# Supplementary material for: Genetic variation, environment and demography intersect to shape Arabidopsis defense metabolite variation across Europe
Source: eLife. 2021 May 5;10:e67784. doi: 10.7554/eLife.67784 (PMC8205490; doi:10.7554/eLife.67784)
Supplement: Supplementary file 1. — (A) List of GSLs and structures. (B) Accessions and glucosinolate (GSL) data – raw data. (C) Heritability values. (D) Accessions and GSL data – emmeans. [file elife-67784-supp1.xlsx]

## Sheet: A. List of GSLs
Short name	Full name	Source and chain length	Structure
3OHP	3-hydroxypropyl	Aliphatic, 3 carbons
3MSO	3-methylsulfinylpropyl	Aliphatic, 3 carbons
4OHB	4-hydroxybutyl	Aliphatic, 4 carbons
OHBut	2S-OH-3-Butenyl	Aliphatic, 4 carbons
4MSO	4-methylsulfinylbutyl	Aliphatic, 4 carbons
Allyl	Allyl-glucosinolate	Aliphatic, 3 carbons
5MSO	5-methylsulfinylpentyl	Aliphatic, 5 carbons
But	3-butenyl	Aliphatic, 4 carbons
Branched	Branched chained glucosinolate	Aliphatic, undetermined
OHPentenyl	3-OH-4-Pentenyl	Aliphatic, 5 carbons
4OHI3M	4-Hydroxy-Indol-3-ylmethyl	Indolic
6MSO	6-methylsulfinylhexyl	Aliphatic, 6 carbons
3MT	3-methylthio	Aliphatic, 3 carbons
7MSO	7-methylsulfinylheptyl	Aliphatic, 7 carbons
4Pentenyl	4-Pentenyl	Aliphatic, 5 carbons
4MT	4-methylthiobutyl	Aliphatic, 4 carbons
8MSO	8-methylsulfinyloctyl	Aliphatic, 8 carbons
I3M	indol-3-ylmethyl	Indolic
7MT	7-methylthioheptyl	Aliphatic, 7 carbons
4MOI3M	4-methoxy-indol-3-ylmethyl	Indolic
BZO	benzoyloxypropyl glucosinolate/ benzoyloxybutyl	Aliphatic, 3/ 4 carbons
8MT	8-methylthiooctyl	Aliphatic, 8 carbons
8MTder	8-methylthiooctyl derivate	Aliphatic, 8 carbons

## Sheet: B. GSLs_raw_data
CS	Round	Name	3OHP..umol.mg.	3MSO..umol.mg.	4OHB..umol.mg.	OH.3.Butenyl..umol.mg.	4MSO..umol.mg.	Allyl..umol.mg.	5MSO..umol.mg.	3.Butenyl..umol.mg.	Branched.chained.GSL..umol.mg.	OH.Pentenyl..umol.mg.	4OHI3M..umol.mg.	6MSO..umol.mg.	3MT..umol.mg.	7MSO..umol.mg.	4.Pentenyl..umol.mg.	4MT..umol.mg.	8MSO..umol.mg.	I3M..umol.mg.	7MT..umol.mg.	4MOI3M..umol.mg.	BZO..umol.mg.	8MT..derivative..umol.mg.	8MT..umol.mg.	Classification_name
CS76350	1	Vezzano-2.2	0.000929078	0	0	0	0	0.00214243	0	0	0	0	0	0	0.000335733	0.000413916	0	3.74862e-05	0.00651868	0.000332779	0	0	0.00109566	0	0.0123775	Allyl
CS76350	2	Vezzano-2.2	0.00135395	0.000150881	0	0	0	0.00302237	0	6.04727e-05	4.05675e-05	0	0	0	0.000464121	0.000281595	0	0	0.00775711	0.000235354	0	0	0.00256682	0	0.0160872	Allyl
CS76351	2	Rovero-1	0.00118435	0	0	0.000131972	0	0.000944986	0	0	0	0	0	0	0.000572841	0.000155393	0	0	0.00629183	0.000404828	0	0	0.00290506	0	0.0156313	Allyl
CS76351	1	Rovero-1	0.000687163	0	0.000104167	9.54784e-05	0	0.000704213	0	0	0	0	0	0	0.000380551	0.000144265	0	9.24456e-05	0.00541779	0.00045159	0	0	0.00226544	0	0.0123982	Allyl
CS76352	1	Voeran-1	0.00291807	0	0	0	0	0	0	0	0	0	0	0	0.000120489	0.000144001	0	0.000197774	0.00377568	0.000284751	0	0	0.00425373	0	0.0100926	3OHP
CS76352	2	Voeran-1	0.0111565	0	0	0	8.85617e-05	0	0	0	0	0	0	0	0.000287024	0.000177791	0.00140019	0.000176949	0.00349796	0.000211616	0	0	0.0047449	0	0.00463447	3OHP
CS76353	1	Altenb-2	0.00107381	0	0	7.63928e-05	0	0.00103099	0	0	5.08328e-05	0	0	0	5.95424e-05	0.000268258	0	0	0.00503376	0.000405888	0	0	0.000977613	0	0.012569	Allyl
CS76353	2	Altenb-2	0.00158874	0	0	0.000119083	0	0.00204119	0	0	0	0	0	0	0.000138448	0.000124033	0	0	0.00372852	0.000400589	0	0	0.00254065	0	0.00655738	Allyl
CS76354	1	Mitterberg-1-181	0.002168	0	0.000119001	0	0	0.00322532	0	0	6.27053e-05	0	0	0	0.000159206	0.000137694	0	5.07552e-05	0.0049417	0.000481576	0	0	0.00180057	0.00268613	0.00988674	Allyl
CS76354	2	Mitterberg-1-181	0.00318857	0	0	0	0	0.00361448	0	0	0	0	0	0	0.000558404	0.000253201	0.000435805	0	0.00363363	0.000353464	0	0	0.00215732	0	0.0041056	Allyl
CS76355	2	Castelfed-4-212	0.00190633	0.000267412	0	0.000132582	0	0.0114125	0	0.000169902	0	0	0	0	0.00258388	0.000344706	0	0	0.00567495	0.000106351	0	0	0.00288309	0	0.013111	Allyl
CS76355	1	Castelfed-4-212	0.0011654	0	0	0	0	0.00176934	0	0	0	0	0	0	0.0010974	0.00024285	0	0.00013802	0.00482583	0.000105594	0	0	0.00220263	0.00451888	0.0154441	Allyl
CS76356	1	Castelfed-4-213	0.000826308	0	0	0	0	0.00272378	0	0	0	0	0	0	0.00034865	0.000244716	0	0.000131891	0.00196318	7.79335e-05	0	0	0.00421753	0	0.00838573	Allyl
CS76357	2	Bozen-1.1	0.00125032	0	0	7.6796e-05	0	0.000575842	0	0	0	0	0	0	0.000453333	0.000114396	0	0	0.00323783	8.84516e-05	0	0	0.00259112	0	0.00860393	Allyl
CS76357	1	Bozen-1.1	0.000709761	0.000167476	0	0	0	0.000638111	0	0	0	0	0	0	0.000957226	7.65587e-05	0	0.000122075	0.00313006	5.24202e-05	0	0	0.0028938	0	0.0089959	Allyl
CS76358	1	Bozen-1.2	0.000819647	0.000268565	0	0	0	0.00158436	0	0	0	0	0	0	0.00164629	0.000111281	0	0.000226034	0.00439652	4.56957e-05	0	0	0.00398479	0	0.0113709	Allyl
CS76359	2	Ciste-1	0	0	0	0.00345001	0	0	0	0	0.000177051	0	0	0	0	0.000469936	0	0.00125697	0.00828143	0.000260855	0.000250334	0	0.0030109	0	0.0184114	OH-But
CS76359	1	Ciste-1	0	0	0.000386995	0.000779144	0	0	0	0	9.68858e-05	0	0	6.61204e-05	0	0.000959385	0	0.000529548	0.0168636	0	0	0	0.000840922	0.00269862	0.0190544	OH-But
CS76360	1	Ciste-2	0	0	0.000676262	0.000632919	0	0	0	0	0.000140675	0	0	4.86819e-05	4.184e-05	0.000592561	0	0.000672142	0.00909044	0.000395836	0.000121473	0	0.000831583	0	0.0103057	OH-But
CS76360	2	Ciste-2	0	0	0	0.00227716	0	0	0	0	0.000218587	0	0	4.0646e-05	6.54964e-05	0.000524472	0	0.000796254	0.00837061	0.000409976	0.00019231	0	0.00222953	0	0.0130168	OH-But
CS76361	2	Monte-1	0	0	0	0.00500939	0	0	0	0	0.000128524	0	0	9.4325e-05	0	0.000648433	0	0.000890788	0.00596105	0.000231147	0.00022142	0	0	0.00669459	0.00747086	OH-But
CS76361	1	Monte-1	0	0	0.000872068	0.00152787	0	0	0	0	0.000131564	0	0	8.84924e-05	0	0.00102302	0	0.000331922	0.0120479	0.000101471	9.11018e-05	0	0.00261212	0	0.0175552	OH-But
CS76362	2	Angel-1	0	0	0	0.0093296	0	0	0	0.000626621	9.0361e-05	0	0	0	4.16232e-05	0.000693089	0.000173312	0.00111571	0.00500694	0.000227853	0.000250044	0	0.00310318	0	0.00954464	OH-But
CS76362	1	Angel-1	0	0	0.00136564	0.00188465	0	0	0	0.000362846	7.17425e-05	0	0	4.56574e-05	3.53946e-05	0.000426436	0	0.000387162	0.00375234	0.000288309	0	0	0.00244037	0	0.0105076	OH-But
CS76364	2	Mammo-2	0	0	0	0.00664591	0	0	0	0.000913083	0.000175842	0	0	3.57651e-05	0	0.000425834	0.000257733	0.000400834	0.00371161	0.000348162	0.000127379	0	0.0034202	0	0.0091225	OH-But
CS76364	1	Mammo-2	0	0	0.0026246	0.0033642	0	0	0	0.000994442	0.000126192	0	0	0	0	0.000324946	0.000250773	0.00140078	0.00384916	0.00035071	0.000146573	0	0.00301092	0	0.0107046	OH-But
CS76365	2	Mammo-1	0	0	0	0.00889255	0	0	0	0.000327157	0.000227333	0	0	0	0.000313035	0.000315313	0.000139377	0.00184482	0.00297736	0.000214295	0	0	0.00432391	0	0.0123628	OH-But
CS76365	1	Mammo-1	0	0	0.0018808	0.00372566	0	0	0	0.000342123	0.000229824	0	0	0	0.000389961	0.000445501	0.000207595	0.00135214	0.0044893	0.000199237	0	0	0.00294847	0	0.0130555	OH-But
CS76366	2	Angit-1	0	0	0	0.00633991	0	0	0	0.00119884	7.29302e-05	0	0	3.36993e-05	0	0.000393017	0.000246879	0.00237173	0.00271539	0.000177245	0.000314879	0	0.00346526	0	0.0102961	OH-But
CS76366	1	Angit-1	0	0	0.00162608	0.00205149	0	0	0	0	0.00069467	0	0	3.65875e-05	0	0.000338972	0	0.00275871	0.00249422	0.000206945	0.000333174	0	0.0027972	0	0.00962824	OH-But
CS76367	1	Lago-1	0	0	0.00100974	0.00215427	0	0	0	0.000281272	0.000382555	0	0	0	0	0.000294803	0	0.00269543	0.00398931	0.000299348	6.15286e-05	8.92742e-06	0.00199035	0	0.0122126	OH-But
CS76367	2	Lago-1	0	0	0	0.00511385	0	0	0	0.000265154	0.000620316	0	0	0	0	0.000297631	6.20398e-05	0.00482823	0.00375681	0.000284388	0	0	0.00219232	0	0.00941199	OH-But
CS76368	1	Apost-1	0.000198765	0	0	0	0	0.000451194	0	0	0	0	0	0	0.000497873	0.000440962	0	4.10916e-05	0.0109158	0.000319606	0	0	0.00079445	0	0.017754	Allyl
CS76368	2	Apost-1	0.00102184	0	0	8.37013e-05	0	0.00144682	0	0	0	0	0	0	0.000978052	0.000367137	0	0	0.00715724	0.000286358	0	0	0.00255515	0	0.0103663	Allyl
CS76369	1	Dobra-1	0.000789813	0	9.58608e-05	0	0	0.00213728	0	0	5.47443e-05	0	0	0	0.000141388	0.000225288	0	3.05466e-05	0.0047643	0.000124188	0	0	0.00255824	0.00266068	0.00988787	Allyl
CS76369	2	Dobra-1	0.00238578	0	0	0	0	0.0090887	0	0	0	0	0	0	0.000245548	0.000327669	0.00127219	0	0.00365356	0.000254458	0	0	0.000493554	0	0.00436348	Allyl
CS76370	1	Petro-1	0.00110293	0	0	0	0	0.00170439	0	0	0	0	0	0	0.000217024	0.000178395	0	0.000100545	0.00459451	0.000430323	0	0	0.00289099	0	0.0115631	Allyl
CS76370	2	Petro-1	0.00160014	0	0	0	0	0.00266794	0	0	0	0	0	0	0.000702775	0.000161938	0.00083762	0.00016183	0.00354959	0.000460543	0	0	0.000685734	0	0.00620838	Allyl
CS76371	1	Lecho-1	0.000259343	0	0.00166009	0.00274705	0	0.00143433	0	0.000462053	0	0	0	4.48041e-05	3.65125e-05	0.000416889	0	0.000409503	0.0050838	0.000457981	6.0957e-05	0	0.00396239	0	0.0105762	OH-But
CS76371	2	Lecho-1	0.000553997	0	0	0.00681195	0	0.00184796	0	0.000748197	0	0	0	4.76397e-05	0	0.000358485	0.000444771	0.000395417	0.00323286	0.000436654	0	0	0.00351356	0	0.00482731	OH-But
CS76372	1	Jablo-1	0	0	0.000950384	0.001931	0	0	0	0.00125038	0.000283798	0	0	0	0	0.000370335	0	0.00170102	0.00543816	0.000248138	0	0	0.00287769	0	0.0114468	OH-But
CS76373	2	Bolin-1	0.000670528	0	0	5.83354e-05	0	0.00112469	0	0	0	0	0	0	8.89025e-05	0.000123944	0	0	0.00290887	0.000551139	0	0	0.00207763	0	0.00980935	Allyl
CS76373	1	Bolin-1	0.000592817	0	0	0	0	0.000742153	0	0	0	0	0	0	8.9145e-05	0.000228217	0	0	0.00399915	0.00035917	0	0	0.00281807	0	0.0115583	Allyl
CS76374	2	Shigu-2	0.00151154	0	0	0	0	0.00119083	0	0	0	0	0	2.60167e-05	4.70158e-05	0.000499132	0	0	0.00748493	0.000278695	0	0	0.00192214	0	0.00480161	Allyl
CS76374	1	Shigu-2	0.00131355	0	8.28799e-05	0	0	0.00166793	0	0	0	0	0	0	0	0.000234905	0	0	0.00498765	0.00022207	0	0	0.00407556	0	0.0100132	Allyl
CS76375	1	Shigu-1	0.000741832	0	0	0	0	0.00111175	0	0	0	0	0	0	7.61765e-05	0.000185943	0	5.81765e-05	0.00600508	0.000547402	0	0	0.00225065	0	0.00922548	Allyl
CS76375	2	Shigu-1	0.00091157	0	0	0	0	0.00191056	0	0	0	0	0	0	7.84096e-05	0.000225978	0.00101143	0	0.00632534	0.00081611	0	0	0.00138479	0.00213741	0.00710366	Allyl
CS76387	1	Xan-1	0.00506588	0	8.75596e-05	0	0	0	0	0	0	0	0	0	0.00198096	3.85432e-05	0	5.91564e-05	0.00134477	0.000218356	0	0	0.00812394	0	0.00888883	3OHP
CS76388	1	Lerik1-3	0.00899158	9.87097e-05	0.000339398	0	0	0	0	0	0	0	0	0	0.00325781	0.000227046	0	0.000274098	0.00281664	0.000208214	0	0	0.00726071	0	0.00927864	3OHP
CS76390	2	Lag2-2	0.00372159	0	0.00115341	0	0.00019525	0	0	0	0	0	0	0	0.000893646	0.000142179	0	0.00336721	0.0039652	0.000109066	0	0	0.00453887	0	0.0146437	3MSO
CS76390	1	Lag2-2	0.00199543	0	0.000742441	0	0	0	0	0	0	0	0	0	0.000414038	0.000184925	0	0.00142228	0.00624057	8.64445e-05	0	0	0.00297442	0	0.0131159	3MSO
CS76392	1	Bak-2	0.000500568	0	0.000350303	0.00060749	0	0.00125738	0	0	6.1338e-05	0	0	0	5.44677e-05	7.01398e-05	0	5.46112e-05	0.00460906	0.000117104	0	0	0.00317804	0	0.0115346	Allyl
CS76394	1	Yeg-1	0.000424703	0	0.00170539	0.00122488	0	0.00150961	0	0.00196694	0	0	0	0	0	0.000244424	8.00144e-05	0.0011194	0.00308085	0.000244783	0	0	0.00264736	0	0.00652019	OH-But
CS76394	2	Yeg-1	0.000455002	0	0	0.0013062	0	0.00130945	0	0.00123967	0	0	0	0	0	0.000273374	0	0.000466654	0.00360765	0.000195834	0	0	0.00226461	0	0.00723934	OH-But
CS76400	1	Star-8	0.000212838	0	0.00118237	0	0	0	0	0	0	0	0	0	0	0.000258334	0	0.00238993	0.00214591	0.00018102	0.000254253	0	0.00228416	0	0.00463008	4MSO
CS76400	2	Star-8	0.000466822	0	0.00260015	0	0.00025443	0	0	0	0	0	0	0	0	0.000345314	0	0.00299153	0.00342095	0.000239717	0.000396426	0	0.00382744	0	0.00627829	4MSO
CS76402	1	Nie1-2	0.00179964	0.000163167	0	0	0.000589127	0	0	0	0	0	0	0	0.002331	0.000147857	0	0	0.00475305	1.31809e-05	0	0	0.00490429	0	0.00992772	3MSO
CS76403	2	TueSB30-3	0.00164795	0	0	0.000148677	0	0.00130804	0	0	0	0	0	0	0.000531192	0.000156891	0	0	0.00371031	0.000262259	0	0	0.00409272	0	0.0100669	Allyl
CS76403	1	TueSB30-3	0.00247392	0.000151123	0.000119762	0	0	0.00207103	0	0	0	0	0	0	0.00112149	0.000189586	0	6.20398e-05	0.00440355	0.000228242	0	0	0.00488938	0	0.0109323	Allyl
CS76404	2	HKT2.4	0.00118497	0	0	0	0	0.00118196	0	0	0	0	0	0	0.000388532	9.86348e-05	0	0	0.00382878	0.000167596	0	0	0.00331763	0	0.00868759	Allyl
CS76404	1	HKT2.4	0.00181399	0	0	0	0	0.00132243	0	0	0	0	0	0	0.000982254	0.000116709	0	0.00019429	0.0043457	0.000281652	0	0	0.00419404	0	0.0111361	Allyl
CS76405	2	TueWa1-2	0.00015417	0	0	0.00395363	0	0	0	6.48929e-05	0.000225538	0	0	5.54731e-05	0	0.000485042	9.04595e-05	0.0031152	0.0039817	0.000103482	0.000397671	0	0.00351507	0	0.00637103	OH-But
CS76405	1	TueWa1-2	0	0	0.00207934	0.00282389	0	0	0	0	0.000146126	0	0	8.86891e-05	0	0.000851986	0.000100597	0.00420489	0.00515065	0.000258477	0.000533176	0	0.00352493	0	0.00951109	OH-But
CS76406	1	Rue3-1-31	0.0019965	0	9.28338e-05	0	0	0.00310763	0	0	0	0	0	0	0.000263998	0.000236736	0	0	0.00547323	0.000335179	0	0	0.00405065	0	0.0110041	Allyl
CS76407	1	TueV-13	0.000128236	0	0.00312035	0.00351836	0	0	0	0	0.000231121	0	0	0.000171525	0	0.00110611	0.000145967	0.00178031	0.00563515	0.000449126	0.00059026	0	0.00517187	0	0.0109878	OH-But
CS76407	2	TueV-13	0.000242982	0	0	0.00509711	0	0	0	0	0.000325191	0	0	4.3811e-05	0	0.000551956	0	0.000563088	0.00361689	0.000170328	0.000293374	0	0.00340981	0	0.00615569	OH-But
CS76410	2	Cdm-0	0	0	0	0.00394337	0	0	0	0.00307667	9.51233e-05	0	0	8.53237e-05	0.000127526	0.000553063	0	0.00412625	0.00417796	0.00019441	0.000860446	0	0.00360893	0	0.0136706	OH-But
CS76411	2	Don-0	0.000358245	0	0	0.00166318	0	0.00158526	0	0.000500756	3.88872e-05	0	0	0	0	0.000508503	6.05344e-05	0.00163236	0.00838693	9.23059e-05	0	0	0.00200741	0	0.0108947	OH-But
CS76412	2	Fei-0	0	0	0	0.00245339	0	0	0	0	0.000262545	0	0	3.45195e-05	0	0.000715633	0	0.000739076	0.00818895	0.000201533	0.000248489	0	0.00105045	0	0.00396914	OH-But
CS76412	1	Fei-0	0.000165532	0	0.00261102	0.0036939	0	0	0	0.000103228	0.00022864	0	0	0.0001279	0	0.000905181	0.000261317	0.00239482	0.00933917	0.000422908	0.000518437	0	0.00433332	0	0.0115049	OH-But
CS76413	1	Leo-1	0.000395797	0	0	0	0	0.000708861	0	0	0	0	1.49155e-05	0	0.000191055	0.000218322	0	0	0.00882376	0.000225294	0	0	0.00160246	0.00304538	0.0167791	Allyl
CS76414	1	Mer-6	0	0	0.00132131	0.00117047	0	0	0	0.00138973	7.44888e-05	0	0	5.60866e-05	0	0.000568221	0.00137611	0.000876579	0.00669174	0.000362256	0.000473561	0	0.00147987	0.00474908	0.0158988	OH-But
CS76416	1	Pra-6	0.000939018	0	0	0	0	0.00140764	0	0	6.18437e-05	0	0	0	0.00029979	0.000228869	0	3.6519e-05	0.00762339	0.000307813	0	0	0.00407225	0	0.013746	Allyl
CS76417	1	Qui-0	0.000106462	0	0.000408273	0.00115317	0	0	0	8.74015e-05	0	0	0	4.96581e-05	7.96027e-05	0.000412186	0	0.00211495	0.00544799	0.000344902	0	0	0.00192555	0	0.0104247	OH-But
CS76417	2	Qui-0	0.000168977	0	0	0.00298742	0	0.000266622	0	0.00032987	0	0	0	4.88688e-05	7.03339e-05	0.000614935	9.52571e-05	0.00377463	0.00640204	0.000316858	0.000366522	0	0.00225434	0	0.00912345	OH-But
CS76418	1	Vie-0	0.000363962	0	0	0	0	0.00151635	0	0	9.23432e-05	0	0	0	0.000883019	0.000166153	0	0	0.00781073	0.000642807	0	0	0.000743569	0.00229556	0.0130376	Allyl
CS76418	2	Vie-0	0.000767184	0	0	0	0	0.00313214	0	0	8.29263e-05	0	0	0	0.00099697	0.000367577	0.000866616	0	0.00677456	0.000442624	0	0	0.00111858	0	0.0103637	Allyl
CS76419	1	Slavi-1	0.000892523	0	0.000165945	0.000171594	0	0.00148948	0	0	0	0	0	0	0.000424354	0.000172462	0	0	0.00344853	0.000724022	0	0	0.00420729	0	0.0110863	Allyl
CS76419	2	Slavi-1	0.0012656	0	0	0.000149869	0.000267641	0.00210151	0	0	0	0	0	0	0.000414708	0.000180995	0	0	0.0030566	0.000632299	0	0	0.00344188	0	0.00613951	Allyl
CS76420	2	Copac-1	0.00146748	0	0	6.59624e-05	0	0.00466064	0	0	0	0	0	0	0.00017543	0.000152029	0	0	0.00256479	0.000330362	0	0	0.00351957	0	0.0119991	Allyl
CS76420	1	Copac-1	0.00491967	0	0.000169872	0.000112842	0	0.00334408	0	0	9.02312e-05	0	0	0	0.000178543	0.00037492	0	0	0.00603259	0.000436947	0	0	0.000672526	0	0.0092693	Allyl
CS76421	1	Borsk-2	0.00211101	0	0.00010409	0	0	0.00168523	0	0	0	0	0	0	0.000277204	0.000183484	0	0	0.00602067	0.000398054	0	0	0.00289681	0	0.0135148	Allyl
CS76421	2	Borsk-2	0.00113698	0	0	0.000188711	0	0.00235925	0	6.46949e-05	0	0	0	0	0.00036807	0.000304271	0	0	0.00471331	0.000332308	0	0	0.00269429	0	0.0107527	Allyl
CS76423	1	Galdo-1	0	0	0.00158167	0.00231409	0	0	0	0.000109613	0.000122615	0	0	5.78374e-05	0	0.000698492	0	0.000556992	0.010084	0.000315039	0.000107609	0	0.00228905	0	0.011688	OH-But
CS76423	2	Galdo-1	0	0	0	0.00635621	0	0	0	7.67636e-05	0.000221228	0	0	4.19804e-05	3.39103e-05	0.000791189	0.000104023	0.000484562	0.0110532	0.000287058	0.000218287	0	0.00218827	0	0.0103042	OH-But
CS76424	2	Timpo-1	0	0	0	0.00402543	0	0	0	0.000358379	0	0	0	0	0	0.000316316	0	0.00230953	0.00301758	0.0002128	0.00023644	0	0.0010783	0	0.00772242	OH-But
CS76424	1	Timpo-1	0	0	0.00106002	0.00191261	0	0	0	0.000117051	8.02159e-05	0	0	0	0	0.000356998	0	0.00292813	0.00409642	0.000217245	0.00025951	0	0.0026201	0	0.01281	OH-But
CS76425	1	Valsi-1	0.000107652	0	0.001554	0.00223412	0	0.00030538	0	0.000195443	0.000102382	0	0	3.50435e-05	0	0.000407322	0	0.000788223	0.00606825	0.000180417	8.97136e-05	0	0.002823	0	0.012439	OH-But
CS76425	2	Valsi-1	0.000362579	0	0	0.00809998	0	0	0	0.000543018	0.000133598	0	2.50607e-05	0	0	0.000550274	0	0.00132944	0.00484668	0.000227084	0.000119295	0	0.0041542	0	0.00877741	OH-But
CS76428	2	Aa-0	0.000515592	0	0.00170852	0	0.000822471	0	6.17673e-05	0	0	0	0	8.00647e-05	0	0.000379092	0	0.00630753	0.00220459	0.000320769	0.000414728	0	0.00257358	0	0.00619993	4MSO
CS76428	1	Aa-0	0.000150459	0	0.00104493	0	0.000182372	0	0	0	7.56237e-05	0	0	0	0	0.000358144	0	0.00638906	0.00278183	0.00058463	0.000478588	0	0.00190536	0	0.00501608	4MSO
CS76430	1	Ag-0	0	0	0.00087542	0.00132732	0	0	0	0	0.000449091	0	0	6.84293e-05	0	0.000569369	0	0.000923187	0.00564904	0.000221439	0.00028666	0	0.00285213	0	0.0102347	OH-But
CS76430	2	Ag-0	0	0	0	0.0063689	0	0	0	0.000381769	0.000215572	0	0	0.000137879	0	0.000805436	0.000345481	0.00175095	0.00556079	0.000238629	0.000533461	0	0.00473154	0	0.00961823	OH-But
CS76431	2	Ak-1	0.000151941	0	0.00148983	0	0.000255173	0	0	0	0	0	0	3.07263e-05	0	0.000445439	0	0.0072814	0.00424029	0.00011521	0.000635328	0	0.00309546	0	0.00541576	4MSO
CS76431	1	Ak-1	0.000291143	0	0.00128388	0	0.000205338	0	0	0	0	0	0	5.22866e-05	0	0.000434033	0	0.00798023	0.00498027	0.000263061	0.000522094	0	0.00292345	0	0.0078142	4MSO
CS76432	2	Alst-1	0	0	0.00019422	0.00847671	0	0	9.85984e-05	0.000108783	0.000425595	0	0	0.000171156	0	0.000648658	0.000268253	0.00184472	0.00350688	0.00041405	0.000367011	0	0.0040259	0	0.00831696	OH-But
CS76432	1	Alst-1	0	0	0.00100347	0.0013318	0	0	0	0	8.1734e-05	0	0	0.000119376	0	0.00028424	9.25694e-05	0.000900076	0.00141968	0.000129518	0.000157445	0	0.0011394	0	0.00294039	OH-But
CS76434	1	Amel-1	0.000595138	0	0	0	0	0.00161803	0	0	0	0	0	0	5.29181e-05	0.000314162	0	0	0.0110603	0.000649078	0	0	0.000891691	0.00289601	0.0144932	Allyl
CS76434	2	Amel-1	0.00111187	0	0	7.02923e-05	0	0.00493826	0	0	0	0	0	0	7.47771e-05	0.000411126	0	0	0.0064534	0.000492708	0	0	0.00166569	0	0.00493331	Allyl
CS76435	1	An-1	0.000215696	0	0.00229657	0.00237597	0	0	0	0.000223076	0	0	0	0	0	0.000207042	8.91283e-05	0.00126997	0.00214658	0.000151181	0.000270717	0	0.00353689	0	0.00891302	OH-But
CS76436	2	Ang-0	0.000311705	0	0	0.00241002	0	0	0	0	9.04607e-05	0	0	6.73026e-05	0	0.000486778	0	0.000606221	0.00424979	0.000197694	0.000172104	0	0.00360157	0	0.00979083	OH-But
CS76436	1	Ang-0	0.00034385	0	0.00201532	0.00223487	0	0	0	0	0.000120695	0	0	0.000125003	7.25729e-05	0.00106137	7.09213e-05	0.00225015	0.00686198	0.000449888	0.000396368	0	0.00407296	0	0.0126626	OH-But
CS76439	2	Anz-0	0.00546122	0	0	0.000187289	0	0	0	0	0	0	0	0	0.000740504	0.000177754	0	0.000588413	0.00222134	5.50663e-05	0	0	0.00762274	0	0.00711788	3OHP
CS76439	1	Anz-0	0.00408294	0	0.000209889	0	0	0	0	0	0	0	0	0	0.000972749	0.000142381	0	7.7289e-05	0.00197472	0.000199942	0	0	0.00658542	0	0.00798798	3OHP
CS76440	1	Appt-1	0	0	0.000394337	0.000796345	0	0	0	0	0.000350347	0	0	0	0	0.000803227	0	0.000626355	0.00578379	0.000389181	0	0	0.00213263	0	0.0115853	OH-But
CS76440	2	Appt-1	0	0	0	0.0023033	0	0	0	0.000316468	0.000629614	0	0	0	0	0.000585192	0.000351836	0.000855513	0.00560295	0.000639604	0.000124331	0	0.00275006	0	0.0110669	OH-But
CS76441	2	Ba-1	0.00126212	0	0	0	0	0.00155773	0	0	0	0	0	0	0.00104714	0.000151929	0.000750119	0	0.00273691	0.000159695	0	0	0.000550825	0	0.0057156	Allyl
CS76441	1	Ba-1	0.000544648	0	0	0	0	0.00100933	0	0	0	0	0	0	0.000911228	0.000273285	0	0	0.00609005	7.68361e-05	0	0	0.000951086	0	0.0131981	Allyl
CS76442	1	Baa-1	0.000614232	0.00156019	0	0	0	0	0	0	0	0	0	0	0.00545077	0.000112375	0	0.000113309	0.00359488	0.000286876	0	0	0.00222706	0	0.0106221	3MSO
CS76442	2	Baa-1	0.00115538	0.000772995	0	0	0	0	0	0	0	0	0	0	0.00737169	8.63819e-05	0	0	0.00222623	0.000376841	0	0	0.00220117	0	0.00717937	3MSO
CS76444	1	Bch-1	0.000226485	0	0.000114051	0	0.000266426	0	0	0	0.000105706	0	0	0	0	0.000242496	0	0.0105327	0.00287357	0.000416304	0.000427864	6.44198e-06	0.00116947	0	0.00260259	4MSO
CS76444	2	Bch-1	0.00031463	0	0.000160355	0	0.000715776	0	0	0	8.76316e-05	0	0	0	6.09654e-05	0.000221945	0	0.00883435	0.00269334	0.000249832	0	0	0.00169068	0	0.00429621	4MSO
CS76447	1	Benk-1	0.00124959	0	0	0	0	0	0	0	0	0	0	0	4.47937e-05	0.000206329	0	0.000115146	0.0041123	0.000322175	0	0	0.0016121	0.00248235	0.00906748	3OHP
CS76447	2	Benk-1	0.00351964	0	0	0	0	0	0	0	0	0	0	0	0.000147761	0.000224227	0.00145781	7.97536e-05	0.00329919	0.000555947	0	0	0.00374659	0	0.0110512	3OHP
CS76449	1	Bik-1	0	0	0.000401226	0.000604731	0	0	0	0.00187223	0	5.6434e-05	0	0	0	0.00109196	0.000349697	9.79736e-05	0.0179923	0.000183689	0	0	0.000701387	0.00225084	0.0126131	OH-But
CS76449	2	Bik-1	0.00195941	0	0	6.0464e-05	0	0.00527842	0	0.000100755	0	0	0	0	0.000259392	0.000178833	0	0	0.00341958	0.000388959	0	0	0.00351666	0	0.00655659	OH-But
CS76449	2	Bik-1	0	0	0	0.00109145	0	0.000187912	0	0.00420483	0.000128271	0	0	0	0	0.00104147	0.000476965	0.000310151	0.012822	0.000225693	0	0	0.00134008	0	0.0109584	OH-But
CS76450	1	Bl-1	0.00128531	0	0	0	0	0	0	0	0	0	0	0	0.00135648	0.000137209	0	0.000298472	0.00520069	6.77724e-05	0	0	0.00309283	0	0.0129158	3MSO
CS76450	2	Bl-1	0.00182107	0	0	0	0	0	0	0	0	0	0	0	0.00103888	0.000176776	0	0	0.00389945	0.000113949	0	0	0.00444841	0	0.0134611	3MSO
CS76451	1	Bla-1	8.40929e-05	0	0.00165446	0.00381053	0	0	0	0.000197158	0.000512745	0	0	0	0	0.00060799	0	0.00203418	0.00638776	0.000175713	5.76029e-05	6.5652e-06	0.000990269	0.00231781	0.00751926	OH-But
CS76451	2	Bla-1	0	0	0	0.00181803	0	0	0	0	0.000141444	0	0	0.000119755	0	0.000977178	0	0.000446279	0.00736338	8.54799e-05	0	0	0.00108628	0	0.00743054	OH-But
CS76452	2	Boot-1	0	0	0.000151637	0.00668767	0	0	0	0.000156168	0.000260635	0	0	0.000132009	0	0.000745495	0.000261145	0.00249373	0.00414808	0.00016973	0.000486828	0	0.00449242	0	0.0104014	OH-But
CS76452	1	Boot-1	0	0	0.0028551	0.00295011	0	0	0	0.000161915	0.000153412	0	0	0.000114484	0	0.000622544	0.000229505	0.00385872	0.00320595	0.000227017	0.000639165	0	0.00369347	0	0.00782425	OH-But
CS76453	1	Bor-1	0.00502584	0	0	0	0	0	0	0	0	0	0	0	0.000871322	0.000209906	0	0.00021841	0.00429117	0.000321821	0	0	0.00461877	0	0.0125363	3OHP
CS76453	2	Bor-1	0.00252347	0	0	0	0	0	0	0	0	0	0	0	0.000212799	0.000132884	0	0	0.0026181	0.000171752	0	0	0.00460796	0	0.00806725	3OHP
CS76454	1	Bor-4	0.00216231	0	0	0	0	0	0	0	0	0	0	0	8.56186e-05	0.00017511	0	0.000129725	0.00355996	0	0	0	0.00354307	0	0.0091166	3OHP
CS76454	2	Bor-4	0.00374303	0	0	0	0	0	0	0	0	0	0	0	5.73807e-05	0.000162271	0	0	0.00329364	0.000457007	0	0	0.00402492	0	0.00717613	3OHP
CS76455	1	Br-0	9.06223e-05	0	0.00118569	0.00170069	0	0	0	0	0.000102902	0	0	5.99499e-05	4.03936e-05	0.00056776	0	0.000512676	0.00628445	0.000455592	0.00012656	0	0.00252468	0	0.0136341	OH-But
CS76455	2	Br-0	0	0	0	0.00463217	0	0	0	0.000210209	7.77913e-05	0	0	8.95284e-05	0	0.000529605	0	0.00108492	0.00349122	0.000343523	0.000197467	0	0.00346535	0	0.00557949	OH-But
CS76457	2	Bsch-0	0.000465965	0	0.0020828	0	0.000287185	0	0	0	0	0	0	3.47976e-05	0	0.00032125	0	0.00234829	0.00162073	0.000290527	0.000249516	0	0.00308209	0	0.00476045	4MSO
CS76457	1	Bsch-0	0.00034817	0	0.00244818	0	0.000271062	0	0	0	4.7486e-05	0	0	0	0	0.000662561	0	0.00502215	0.00409903	0.000307524	0.000466486	0	0.00348953	0	0.00762947	4MSO
CS76459	1	Ca-0	0.000213401	0	0.00107469	0	0.000175356	0	0	0	0	0	0	0	0	0.000206303	0	0.00711733	0.00266366	0.00025729	0.000471023	0	0.00336508	0	0.00864563	4MSO
CS76459	2	Ca-0	0.000261732	0	0	0	0.000326542	0	0	0	0	0	0	0	0	0.000139334	0	0.00495628	0.00158159	0.000200366	0.000325573	0	0.00240351	0	0.00618549	4MSO
CS76460	1	Cal-0	0.000187352	0	0.000461167	0.000761231	0	0.000403266	0	0.000709982	0.000245165	6.46683e-05	0	0	0	0.000702677	0.000264479	0.00134016	0.00520257	0.000261463	0	7.02676e-06	0.00120273	0.00385971	0.0108406	OH-But
CS76460	2	Cal-0	0.000370757	0	0	0.00107311	0	0.000394375	0	0.000657624	0.000331804	0	0	9.58219e-05	4.4507e-05	0.000623818	0.000241399	0.00169094	0.00454283	0.000175214	0	0	0.00278335	0	0.0111745	OH-But
CS76462	1	Cerv-1	0	0	0.00128186	0.00227146	0	0	0	8.20914e-05	0	0	0	4.25439e-05	0	0.00038523	0	0.000589026	0.00734588	0.000287394	0.000106038	0	0.000932786	0	0.00970768	OH-But
CS76462	2	Cerv-1	8.42484e-05	0	0	0.00712596	0	0	0	0.000145466	0.000202363	0	3.6122e-05	0	0	0.000477695	0	0.00101266	0.00536999	0.000419688	0.000234601	0	0.00344451	0	0.00982296	OH-But
CS76463	2	Chat-1	0.00150675	0.000103145	0	0	0	0.000923453	0	0	0	0	0	0	0.00167527	0.00014379	0	0	0.00328934	0.000252131	0	0	0.00328669	0	0.00952724	Allyl
CS76463	1	Chat-1	0.00156109	0.000500239	0	0	0	0.000799742	0	0	0	0	0	0	0.00300309	0.000136648	0	0	0.00389897	0.000195138	0	0	0.00299535	0	0.0105363	Allyl
CS76464	1	Chi-0	0.00145747	0.000175485	0	0	0	0	0	0	0	0	0	0	0.00392223	0.000109275	0	0.000218627	0.00425946	1.25876e-05	0	0	0.00256059	0	0.00845915	3MSO
CS76464	2	Chi-0	0.00154061	0.000205462	0	0	0	0	0	0	0	0	0	0	0.00182665	7.32977e-05	0	0	0.00287506	6.24289e-05	0	0	0.00337418	0	0.0124364	3MSO
CS76467	2	Cnt-1	0	0	0.00015434	0.00848314	0	0	0	0.000119728	0.000756398	0	0	0.000153561	0	0.000690305	0.000178096	0.0016496	0.00697095	0.00014972	0.000128278	0	0.00256273	0	0.0119681	OH-But
CS76467	1	Cnt-1	0	0	0.000509512	0.00120728	0	0	0	7.02432e-05	0.00014732	0	0	0	0	0.000246749	8.88829e-05	0.000516043	0.00256727	8.35666e-05	0	0	0.000824673	0	0.00529075	OH-But
CS76468	1	Co-1	0.000180395	0	0.00161311	0.00156827	0	0	0	0.00023597	0	0	0	0	0.000997388	0.000395272	0.000113237	0.00315795	0.00523885	0.000117895	0.000337159	0	0.00129319	0.00335609	0.00934951	OH-But
CS76468	2	Co-1	0.000133876	0	0	0.00135138	0	0	0	0.000230624	0	0	0	0	0.000476842	0.000325122	5.23492e-05	0.00083269	0.00330927	0.00018994	0.000214773	0	0.00092272	0	0.00514216	OH-But
CS76469	2	Com-1	0.00015931	0	0	0.00396437	0	0	0	0	0.000296384	0	0	7.43915e-05	0	0.000631189	7.38364e-05	0.000394242	0.00286381	0.000286857	0.000198896	0	0.0030144	0	0.00708601	OH-But
CS76469	1	Com-1	8.19657e-05	0	0.0018486	0.00261639	0	0	0	0	0.000198592	0	0	0.00010271	0	0.000739755	0.000164323	0.0017277	0.00384185	0.000350888	0.000404122	0	0.00298508	0	0.00952025	OH-But
CS76470	2	Da(1)-12	0.00352037	0	0	6.80396e-05	0	0	0	0	0	0	0	0	0.000239367	0.000111039	0	0	0.00182168	0.000131776	0	0	0.00530494	0	0.0109781	3OHP
CS76470	1	Da(1)-12	0.00372139	0	0	0	0	0	0	0	0	0	0	0	0.000293021	6.48131e-05	0	0	0.00150074	0.000129472	0	9.38318e-06	0.00402509	0	0.00708223	3OHP
CS76471	1	Db-1	0.00238385	0	0.000113212	0	0	0.00408823	0	0	0	0	0	0	0.000352818	0.000196115	0	0	0.00521883	0.000542495	0	0	0.0031937	0	0.0113582	Allyl
CS76471	2	Db-1	0.00147061	0	0	0	0	0.00145828	0	0	0	0	0	2.69158e-05	0	0.000371318	0	0	0.00510312	0.000218861	0	0	0.00122529	0	0.00358182	Allyl
CS76472	1	Di-G	0.00664715	0	0	0	0	0	0	0	0	0	0	0	0.00100112	0.00013846	0	0.000187848	0.0047949	0	0	0	0.00558614	0	0.0133955	3OHP
CS76472	2	Di-G	0.00473298	0	0	0	0	0	0	0	0	0	0	0	0.000314206	0.000136948	0	0	0.0036224	0	0	0	0.00577761	0	0.0105265	3OHP
CS76474	1	Do-0	0.00116402	0	0	0	0	0.00148479	0	0	7.32977e-05	0	0	0	0.000237771	0.000177919	0	2.51919e-05	0.00465373	0.000385793	0	0	0.00330181	0	0.010923	Allyl
CS76474	2	Do-0	0.00346476	0	0	0	0	0.0037079	0	0	5.51416e-05	0	0	0	0.000294059	0.000205968	0.000593795	0	0.00353797	0.000343546	0	0	0.00262	0.00236148	0.00492066	Allyl
CS76476	1	Dra-0	0.00384293	0	0	0	0	0	0	0	0	0	0	0	0.000359772	7.1887e-05	0	0	0.00190032	0.000167287	0	1.27462e-05	0.0059293	0	0.0100647	3OHP
CS76476	2	Dra-0	0.0032955	0	0	0	0	0	0	0	0	0	0	0	0.000154289	8.64053e-05	0	0	0.00139483	9.73499e-05	0	0	0.00415499	0	0.0101455	3OHP
CS76477	2	Durh-1	0.000225146	0	0	0.00427598	0	0	0	0	0.00027456	0	0	3.11286e-05	0	0.000305404	0	0.00158914	0.00243016	8.6933e-05	0.000353788	0	0.00435184	0	0.00754889	OH-But
CS76477	1	Durh-1	0.000124622	0	0.00354792	0.0045997	0	0	0	0.000121591	0.000248889	0	0	0.000109051	0	0.000452451	0.000202385	0.00211167	0.00356307	0.000149492	0.000469635	0	0.00408558	0	0.0102542	OH-But
CS76478	1	Ei-2	0.00221886	0	0	0	0	0.00228208	0	0	0	4.04647e-05	0	0	0.000342931	0.000399873	0	0	0.00718104	0.000465339	0	0	0.00320382	0	0.0123778	Allyl
CS76478	2	Ei-2	0.00179029	0	0	8.10818e-05	0	0.00255659	0	0	9.76059e-05	0	0	0	4.62466e-05	0.000266572	0	0	0.00619553	0.000373487	0	0	0.00327129	0	0.0105024	Allyl
CS76479	1	El-0	0.00247554	7.51284e-05	0	0	0	0.0012857	0	0	0	0	0	0	0.00188752	0.000180074	0	0	0.00469292	0.000250064	0	0	0.00557496	0	0.0124589	Allyl
CS76479	2	El-0	0.00152049	0.000107882	0	0	0	0.00130408	0	0	0	0	0	0	0.0012239	0.00014821	0	0	0.0034941	0.000146591	0	0	0.00491176	0	0.0147221	Allyl
CS76480	1	Ema-1	0	0	0.00210025	0.00303671	0	0	0	0.000154139	0.000208476	0	0	0.000264212	0	0.00098315	0.000350713	0.000809887	0.00643361	0.000469784	0.000224443	0	0.00264441	0	0.0127873	OH-But
CS76480	2	Ema-1	0	0	0	0.00441336	0	0	0	5.16306e-05	0.000136404	0	0	0.000228933	0	0.00056051	0.000287924	0.000201647	0.00565808	0.000269168	0.000120842	0	0.00257701	0	0.0150667	OH-But
CS76481	1	En-2	0.000255036	0	0.00139523	0	0.000171715	0	0	0	0	0	1.44979e-05	0	5.4884e-05	0.000358354	0	0.00954532	0.00422153	0.00030346	0.000442289	0	0.00334208	0	0.00839753	4MSO
CS76481	2	En-2	0.000187975	0	0.000950134	0	0.000436283	0	0	0	0	0	0	0	0	0.00011441	0	0.00764722	0.00276309	0.000238171	0.000251293	0	0.002431	0	0.00584973	4MSO
CS76482	2	En-D	0.00252598	0	0	0	0	0	0	0	0	0	0	0	8.4416e-05	0.000101884	0	0	0.00212481	0.000184181	0	0	0.00622991	0	0.00861889	3OHP
CS76482	1	En-D	0.00382072	0	0	0	0	0	0	0	0	0	0	0	0.000313364	9.47019e-05	0	0.000297012	0.00294464	0.000264358	0	1.17139e-05	0.00692299	0	0.0123755	3OHP
CS76484	1	Es-0	0.000853579	0	0	0	0	0.00139637	0	0	0	0	0	0	0.000355487	0.000353277	0	5.91697e-05	0.00516143	0.00016679	0	0	0.00415987	0	0.0102629	Allyl
CS76485	2	Est	0.00282277	0	0	0	0	0	0	0	0	0	0	0	0.000237489	0.000151647	0	0.00104838	0.00326461	0.000316354	0	0	0.00488212	0	0.0103868	3OHP
CS76485	1	Est	0.00577205	0	0	0	0	0	0	0	0	0	0	0	0.00103909	0.000168756	0	0.000151515	0.00474859	0.00029737	4.08768e-05	0	0.00487025	0	0.0100187	3OHP
CS76486	2	Et-0	0	0	0	0.00507887	0	0	0	0.000131948	0.000376325	0	0	0.000208009	0	0.00125239	0.000158183	0.000248474	0.0107094	0.000256702	0	0	0.00267977	0	0.00951921	OH-But
CS76486	1	Et-0	0	0	0.000440262	0.00102116	0	0	0	0	0.000150023	0	0	0.000129803	0	0.00145021	0	0.000179899	0.0138943	0.000168188	0.000114736	0	0.00203571	0	0.0117125	OH-But
CS76487	2	Etna-2	0.00155189	0	0	0.000124508	0	0.00263596	0	0	0	0	0	0	6.44602e-05	0.000559373	0.000351458	0.000164692	0.012639	0.000947489	8.68293e-05	0	0.000986557	0.00193096	0.0115207	Allyl
CS76487	1	Etna-2	0.000803902	0	0	8.47193e-05	0	0.00122351	0	0	5.71084e-05	0	0	4.1967e-05	5.50956e-05	0.000415406	0	0.000138743	0.0129637	0.000687199	5.94865e-05	0	0.000689604	0.00135085	0.0115152	Allyl
CS76488	1	Fi-0	0.00185147	0.000744585	0	0	0	0	0	0	0	0	0	0	0.0049231	0.000305923	9.27231e-05	0.00017255	0.00447771	0.000366067	0	0	0.00327471	0	0.0131067	3MSO
CS76488	2	Fi-0	0.00420667	7.62954e-05	0	0	0	0	0	0	0	0	0	0	0.00128403	0.000284019	0	0	0.00345043	0.00031021	0	0	0.00609408	0	0.0158707	3MSO
CS76489	1	Fr-2	0.000363633	0	0	0	0.000139327	0	0	0	0	0	0	7.34975e-05	0	0.000717525	0	0.00492597	0.00558331	0.000849129	0.000267212	0	0.000937442	0.00384917	0.00732789	4MSO
CS76489	2	Fr-2	0.000540595	0	9.73469e-05	0	0.000397313	0	0	0	0	0	0	3.51463e-05	0	0.000431861	0	0.00601706	0.00350638	0.0012176	0	0	0.00145052	0	0.00289588	4MSO
CS76490	2	Ga-0	0.000415939	0.00048203	0	0	0	0.00323343	0	0	0	0	0	0	0.00533441	0.000279928	0	0	0.00443903	0.000338163	0.00021285	0	0.00100011	0	0.00604387	Allyl
CS76490	1	Ga-0	0.000467024	0.0011955	0	0	0	0.001942	0	0	0	0	0	0	0.0066537	0.000234468	0	0.000137572	0.00513482	1.97683e-05	0	0	0.000592077	0.00177466	0.00903873	Allyl
CS76491	1	Gd-1	0.000474429	0	0.00270576	0	0.00019801	0	5.97451e-05	0	0	0	0	7.36662e-05	0	0.000455707	0	0.00946682	0.00318079	0.000403346	0.000857411	0	0.00442944	0	0.00797838	4MSO
CS76491	2	Gd-1	0.000259182	0	0.00182402	0	0.000280389	0	0	0	0	0	0	0	0	0.000196411	0	0.00775621	0.00216622	0.000277849	0	0	0.00360703	0	0.00828976	4MSO
CS76492	2	Gel-1	0.00120504	0	0	0	0	0.00275286	0	0	0	0	0	0	0.000162062	7.58301e-05	0	0	0.00216456	0.000620637	0	0	0.00421201	0	0.00828798	Allyl
CS76492	1	Gel-1	0.00208206	0	0	0	0	0.0028422	0	0	0	0	0	0	0.00105634	7.00449e-05	0	0	0.00291618	0.000460267	0	0	0.00495457	0	0.0108269	Allyl
CS76493	2	Gie-0	0.00116041	0.00318441	0	0	0	0	0	0	0	0	0	0	0.0103854	0.000277294	0	0	0.00347126	4.69109e-05	0	0	0.00130955	0	0.00462806	3MSO
CS76493	1	Gie-0	0.00117838	0.00382346	0	0	0	0	0	0	0	0	0	0	0.0104659	0.000350113	0	0.000162821	0.00478607	0.000127013	0	0	0.000782975	0.00204638	0.00774434	3MSO
CS76496	1	Gr-1	0.00174993	0	0	0	0	0	0	0	0	0	0	0	0.000104555	6.14438e-05	0	8.65771e-05	0.0019122	7.47953e-05	0	0	0.00247777	0	0.00565155	3OHP
CS76496	2	Gr-1	0.0029645	0	0	0	0	0	0	0	0	0	0	0	0	6.24415e-05	0	0	0.00234622	0.00019198	0	0	0.00476187	0	0.00986806	3OHP
CS76498	1	Gu-0	0.000142661	0	0.00153841	0	0.000156554	0	0	0	0	0	0	0	0	0.000282423	0	0.00518861	0.00334523	0.000584715	0.000536624	0	0.00254939	0	0.0067241	4MSO
CS76498	2	Gu-0	0.000209538	0	0.0018911	0	0.000258799	0	0	0	0	0	0	0	0	0.000185623	0	0.00449228	0.00220397	0.00049701	0.000461151	0	0.00328819	0	0.00595829	4MSO
CS76500	1	Ha-0	0.00316576	0.000376985	0	0	0	0.00154967	0	0	0	0	0	0	0.0031439	0.000225356	0	0	0.00632986	8.63458e-06	0	0	0.00343648	0	0.00911804	Allyl
CS76500	2	Ha-0	0.00163999	0	0	9.513e-05	0	0.00128064	0	0	0	0	0	0	0.000466852	0.000182616	0	0	0.0045938	6.72771e-05	0	0	0.00330253	0	0.00908028	Allyl
CS76512	2	Hh-0	0.000982606	0	0	0	0	0.00124735	0	0	0	0	0	0	0.000138892	0.000349511	0	0	0.007143	0.000678076	0	0	0.00246432	0	0.0151361	Allyl
CS76512	1	Hh-0	0.000519137	0	0	0	0	0.000319451	0	0	0	0	0	0	5.68521e-05	0.000343585	0	0	0.00884165	0.000523211	0	0	0.000852377	0.00281171	0.016102	Allyl
CS76513	2	Hn-0	0.00175836	0	0	0	0	0.00119204	0	0	0	0	0	0	0.000968112	0.000201755	0	0	0.00400322	0.000289715	0	0	0.00268727	0	0.00526073	Allyl
CS76513	1	Hn-0	0.00195792	7.19097e-05	0	0	0	0.00198853	0	0	0	0	0	0	0.00181997	0.000195891	0	0.000828128	0.00492289	0.000343748	0	0	0.00413563	0	0.0119306	Allyl
CS76514	1	HR-5	9.03306e-05	0	0.00170587	0.00327404	0	0	0	0.000254694	0.000233879	0	0	8.05554e-05	0	0.000599765	0	0.00106698	0.00446786	0.000275208	0.00021074	0	0.000905981	0.00177443	0.00684092	OH-But
CS76514	2	HR-5	0	0	0	0.00345041	0	0	0	0	0.000298563	0	0	0	0	0.000282314	0.000115243	0.000379693	0.00389732	0.000285977	0.000204642	0	0.000815613	0	0.00800202	OH-But
CS76518	2	Je-0	0.00202947	0.000145583	0	0.000124811	0	0.00698552	0	0	0	0	0	0	0.000852058	0.00060185	0	0	0.00719533	0.000197199	0	0	0.00271303	0	0.010596	Allyl
CS76518	1	Je-0	0.000826253	0	0	0	0	0.00118477	0	0	3.80378e-05	0	0	0	0.000163791	0.000164416	0	7.43186e-05	0.00486694	0.000293761	0	0	0.00144818	0.00319126	0.0111392	Allyl
CS76519	2	Jl-3	0.000670322	0	0	0	0	0.00111584	0	0	0	0	0	0	8.81727e-05	7.14766e-05	0	0	0.00148432	0.000137742	0	0	0.00237856	0	0.00631915	Allyl
CS76519	1	Jl-3	0.00147085	0	8.96519e-05	0	0	0.000915463	0	0	0	0	0	0	0.000421084	0.000114319	0	0	0.00256807	0.000216634	0	0	0.00402725	0	0.0100467	Allyl
CS76520	1	Jm-0	0.00556342	0	0	0	0	0	0	0	0	0	0	0	0.000369289	0.000358812	0	0.000126778	0.00729982	0	0	0	0.00525668	0	0.0063117	3OHP
CS76520	2	Jm-0	0.00557015	0	0	0	0	0	0	0	0	0	0	0	5.71374e-05	0.000422581	0	0	0.00643453	1.51407e-05	0	0	0.00576842	0	0.00552866	3OHP
CS76524	2	Kb-0	0.00129992	0	0.000144952	0	0	0.00555001	0	0	0	0	0	0	0.000618041	0.00010759	0	0	0.00228884	0.000261646	0	0	0.00418185	0	0.00969522	Allyl
CS76524	1	Kb-0	0.00200642	8.91395e-05	0	0	0	0.00409412	0	0	0	0	0	0	0.00207645	0.000121922	0	0	0.00310846	0.000287014	0	0	0.00526333	0	0.00981922	Allyl
CS76525	1	Kelsterbach-4	0.000184467	0	0.00129369	0	0.000175856	0	0	0	0	0	0	0	0	0.000211346	0	0.00810058	0.00294944	0.000250238	0.00062864	0	0.00256279	0	0.00727712	4MSO
CS76525	2	Kelsterbach-4	0.000102906	0	0.00143833	0	0.000194312	0	0	0	0	0	0	0	5.71608e-05	0.000173226	0	0.0061334	0.00206795	0.000250905	0.000569105	0	0.00286881	0	0.0059102	4MSO
CS76526	2	Kil-0	0.00252178	0	0	0	0	0.00270066	0	0	0	0	0	0	0.000302401	0.000318	0	0	0.00712528	3.07101e-05	0	0	0.00690723	0	0.0112619	Allyl
CS76526	1	Kil-0	0.00186647	0.000112721	0	0	0	0.00186928	0	0	0	0	0	0	0.00164324	0.000266247	0	0	0.00742944	0.000162515	0	0	0.0048755	0	0.0120037	Allyl
CS76528	1	Kl-5	0.00220872	0.000110227	7.66059e-05	0	0	0.00532006	0	0	0	0	0	0	0.00189134	0.000118592	0	0	0.00325574	0.000403848	0	0	0.00574792	0	0.0102534	Allyl
CS76528	2	Kl-5	0.00148026	0	0	0.000209299	0	0.00529453	0	0	0	0	0	0	0.00052603	0.000122323	0	0	0.0024899	9.98683e-05	0	0	0.00414654	0	0.012492	Allyl
CS76531	1	Ko-2	0.000363025	0	0	0	0	0.000686527	0	0	0	0	0	0	0.000201892	0.000195302	0	0	0.00437442	9.88837e-05	0	0	0.000556633	0.00200938	0.0074672	Allyl
CS76534	2	Krot-0	0.00436871	0	0	0	0	0	0	0	0	0	0	0	0.000333776	0.000142394	0	0	0.00272674	0.000162516	0	0	0.00638907	0	0.00871993	3OHP
CS76534	1	Krot-0	0.00666777	0	0	0	0	0	0	0	0	0	0	0	0.0011228	0.000213826	0	0.000176265	0.00398456	0.000210618	0	0	0.0057909	0	0.0111275	3OHP
CS76538	1	La-0	0.000494825	0	0.00172649	0	0.00129874	0	0.000171422	0	0	0	0	0.000172573	0	0.00115415	0	0.0107256	0.00774124	8.12906e-05	0.000576395	0	0.00331203	0	0.00658859	4MSO
CS76538	2	La-0	0.000547108	0	0.00112088	0	0.00131119	0	5.66369e-05	0	0	0	0	4.38706e-05	4.42419e-05	0.000517236	0	0.00947276	0.00468827	5.51155e-05	0	0	0.00286808	0	0.00826122	4MSO
CS76539	2	Lan-0	0.000147672	0	0	0.00459303	0	0	0	0.000571753	0.000347453	0	0	5.95613e-05	0	0.000457928	0.000430123	0.00190636	0.00435952	9.62568e-05	0.000548945	0	0.0011495	0	0.00441696	OH-But
CS76539	1	Lan-0	0.000170871	0	0.00222931	0.00291026	0	0	0	0.00088126	0.0001498	0	0	4.85931e-05	0	0.000400559	0.000424115	0.00167764	0.00330322	0.000117485	0.000472122	0	0.00305287	0	0.00762195	OH-But
CS76540	1	Le-0	0.000611652	0.00308489	0	0	0	0	0	0	0	0	0	0	0.00543235	0.000327894	0	0.000132707	0.00701919	3.91461e-05	0	0	0.00087937	0.00184358	0.00884193	3MSO
CS76540	2	Le-0	0.000708031	0.000967718	0.00175567	0	0.000295566	0	0	0	0	0	0	0	0.00280411	0.000252349	0	0.00618258	0.0038038	0.000327312	0.000381041	0	0.00306193	0	0.00641847	3MSO
CS76541	2	Li-2:1	0.00238801	0	0	0	0	0	0	0	0	0	0	0	3.92489e-05	0.000140494	0	0	0.00216998	0.000140741	0	0	0.00292902	0	0.00703565	3OHP
CS76541	1	Li-2:1	0.00393323	0	0	0	0	0	0	0	0	0	0	0	0.000320431	0.000127722	0	0.00017686	0.00307398	0.0001527	0	0	0.00323639	0	0.00821603	3OHP
CS76543	1	Litva	0.00448335	0	0	0	0	0	0	0	0	0	0	0	0.00198865	0.000259932	4.68189e-05	0.00120181	0.00422714	0.000406821	0	0	0.00115039	0.00257955	0.00796726	3OHP
CS76543	2	Litva	0.00323006	0	0	0	0	0	0	0	0	0	0	0	6.4329e-05	0.000164434	0	0.00110614	0.00283804	0.00035196	0	0	0.00134593	0	0.00443015	3OHP
CS76545	2	Lm-2	0.000342071	0	7.64775e-05	0	0.000472838	0	0	0	0	0	0	0	0.000419778	0.000307039	0	0.00813593	0.00358271	7.93558e-05	0.000351301	0	0.00182795	0	0.005469	4MSO
CS76545	1	Lm-2	0.000480492	0	0	0	0.000226285	0	0	0	0	0	0	0	0.000846005	0.000268744	0	0.00969278	0.00443204	1.85018e-05	0.000364524	0	0.00126274	0.00272816	0.0074917	4MSO
CS76546	1	Lp2-2	0.00385332	0.000100908	0	0	0	0	0	0	0	0	0	0	0.0017798	0.00013149	0	0.000776464	0.00303309	0.000242556	0	0	0.00372354	0	0.00952749	3OHP
CS76546	2	Lp2-2	0.0034781	0	0	0	0	0	0	0	0	0	0	0	0.000181928	9.50535e-05	0	0	0.0018427	0.000151506	0	0	0.00471372	0	0.00858261	3OHP
CS76549	2	Me-0	0.000914957	0.000325225	0	0	0	0	0	0	0	0	0	0	0.00361024	0.000130479	0	0	0.0021832	0.000110659	0	0	0.00283391	0	0.00874302	3MSO
CS76549	1	Me-0	0.00118665	0	0.000268955	0	9.778e-05	0	0	0	0	0	0	0	0.000201173	0.00011281	0	0.00145019	0.00185217	0.000173696	0	0	0.00332905	0	0.00497417	3MSO
CS76550	1	Mh-0	0.000252679	0	0.00207215	0	0.000269226	0	0	0	0	0	0	5.61559e-05	0	0.000327846	0	0.00941346	0.00363022	0.000467495	0.000699187	0	0.00298343	0	0.00668061	4MSO
CS76551	1	Mir-0	0	0	0.0020829	0.00255165	0	0	0	0	0.000138263	0	0	6.02196e-05	0	0.000537341	0	0.00124576	0.00456309	0.000475491	0.000271714	0	0.00303519	0	0.00896067	OH-But
CS76551	2	Mir-0	0	0	0	0.00815786	0	0	0	6.25502e-05	0.000355196	0	0	4.53619e-05	0	0.000643779	0.000149867	0.00345142	0.00412918	0.000593493	0.000484007	0	0.00395265	0	0.010166	OH-But
CS76552	1	Mnz-0	0.00182113	0.000106194	0	0	0	0.00215396	0	0	0	0	0	0	0.00277883	0.000156298	0	0.000766653	0.00396313	0.000295075	0	1.7071e-05	0.00303482	0	0.010552	Allyl
CS76552	2	Mnz-0	0.000871819	0	0	0	0	0.00165665	0	0	0	0	0	0	0	6.88429e-05	0	0	0.00190487	5.67891e-05	0	0	0.00179981	0	0.00537908	Allyl
CS76555	2	Ms-0	0.00138083	0	0	5.49534e-05	0	0.00220647	0	0	0	0	0	0	8.55355e-05	0.000158935	0	0	0.00384446	0.000413079	0	0	0.00210116	0	0.00593911	Allyl
CS76555	1	Ms-0	0.00105631	0	0	0	0	0.00130818	0	0	0	0	0	0	5.77257e-05	0.000251809	0	0	0.00596228	0.000524108	0	0	0.00364395	0	0.0133356	Allyl
CS76557	2	Mz-0	0.000264293	0	0.00238923	0	0.000307993	0	0	0	0	0	0	0	0	0.000205947	0	0.00898981	0.00237303	0.000610068	0.000658932	0	0.003146	0	0.00466715	4MSO
CS76557	1	Mz-0	0.000354551	0	0.00104712	0	0.000193529	0	0	0	0	0	0	0	0	0.00029457	0	0.00739006	0.00332844	0.00033389	0.000351686	0	0.00305738	0	0.00769693	4MSO
CS76558	1	Na-1	0.00117325	0	0.000481896	0	0	0	0	0	0	0	0	0	9.3079e-05	0.000226255	0	0.000829174	0.00403033	0	0	0	0.00352456	0	0.0106205	3OHP
CS76558	2	Na-1	0.00140024	0	0.000395744	0	0	0	0	0	0	0	0	0	0.000102545	0.000207782	0	0	0.00340051	0.000130403	0	0	0.00364771	0	0.00851748	3OHP
CS76559	2	Nc-1	0.00661986	0	0	0	0	0	0	0	0	0	0	0	0.000168633	0.00021839	0	0	0.00320721	0.000400639	0	0	0.00536798	0	0.0105564	3OHP
CS76559	1	Nc-1	0.00592463	0.000272077	0	0	0	0	0	0	0	0	0	0	0.00386233	0.000236213	0.000106198	0.000152685	0.00408755	0.000385584	0	0	0.00436257	0	0.011498	3OHP
CS76562	2	Nok-3	0.00156985	0	0	0.000104147	0	0.00171553	0	0	0	0	0	0	0.000104781	0.000134316	0	0	0.00296774	0.000609912	0	0	0.00246944	0	0.0121098	Allyl
CS76563	1	Np-0	0.00142667	7.72379e-05	0	0	0	0	0	0	0	0	0	0	0.00119916	0.000230299	0	0.00101268	0.0057363	0	0	0	0.00313836	0	0.00993665	3OHP
CS76563	2	Np-0	0.00333343	0	0	0	0	0	0	0	0	0	0	0	6.0175e-05	0.000191454	0	0	0.00455274	4.73563e-05	0	0	0.00562444	0	0.0155019	3OHP
CS76564	2	Nw-0	0.000378048	0	0.00331078	0	0.000520689	0	0	0	0	0	0	0	0	0.000228063	0	0.00783883	0.00312607	0.000987356	0	0	0.00414062	0	0.00511294	4MSO
CS76564	1	Nw-0	0.000286463	0	0.00187774	0	0.00049716	0	0	0	0	0	0	5.25843e-05	0	0.000366639	0	0.00956927	0.00370217	0.000691899	0.000451719	0	0.00287677	0	0.00528827	4MSO
CS76566	1	Ob-0	0.000306097	0	0.00233296	0	0.000447667	0	0	0	0	0	0	4.65418e-05	0	0.000339035	0	0.0107942	0.00370933	0.000324563	0.000487478	0	0.00250593	0	0.00519412	4MSO
CS76566	2	Ob-0	0.000270542	0	0.00312856	0	0.000251226	0	0	0	0	0	0	0	0	0.000138352	0	0.00652171	0.00205336	0.000297486	0.000308318	0	0.00360193	0	0.00472496	4MSO
CS76567	2	Old-1	0.000880855	0	0	0	0	0.00113391	0	0	0	0	0	0	5.11192e-05	0.000105354	0	0	0.00336263	0.000254344	0	0	0.00237234	0	0.00754965	Allyl
CS76567	1	Old-1	0.00150181	0	0	0	0	0.00123737	0	0	0	0	0	0	7.89499e-05	0.000253104	0	0	0.00599543	0.00039612	0	0	0.00352194	0	0.0126572	Allyl
CS76568	1	Or-0	0.000489691	0	0.00197508	0	0.000566597	0	0	0	0	0	0	4.8686e-05	7.24829e-05	0.000355219	0	0.0115283	0.00469287	0.000624267	0.000501137	0	0.00386315	0	0.00705404	4MSO
CS76568	2	Or-0	0.000276111	0	0.00227843	0	0.000243938	0	0	0	0	0	0	0	0	0.000191945	0	0.00738765	0.00238721	0.000740962	0.000467909	0	0.00391351	0	0.00474228	4MSO
CS76569	2	Ove-0	0.00044242	0	0.00162331	0	0.000471036	0	0	0	0	0	0	0	0	0.000154727	0	0.00779889	0.00112664	0.000245229	0.000499288	0	0.00290297	0	0.00458196	4MSO
CS76569	1	Ove-0	0.000259856	0	0.00128562	0	0.000260741	0	0	0	0	0	0	0	0	0.000259715	0	0.0101994	0.00287991	0.000322091	0.000695461	0	0.00271735	0	0.00612138	4MSO
CS76573	1	Pla-0	8.61488e-05	0	0.000147062	0	0.000172956	0	0	0	0.000189464	0	0	0	0.000584168	0.000387633	0	0.00484794	0.00595819	0.000101326	0	8.55373e-06	0.000636522	0.00204268	0.0114831	4MSO
CS76573	2	Pla-0	0	0	0.000203323	0.000142981	0.000200862	0	0	0	0.00012099	0	0	0	0.00050929	0.000151711	0	0.00459586	0.00248576	0.000209504	0	0	0.000975526	0	0.00524353	4MSO
CS76579	1	Pu2-23	0.0016441	0	0	0	0	0.00281271	0	0	0	0	0	0	0.000363556	0.000124309	0	6.84133e-05	0.00450225	0.000255703	0	0	0.00283277	0	0.0121695	Allyl
CS76579	2	Pu2-23	0.00121378	0	0	5.48903e-05	0	0.00257615	0	0	0	0	0	0	0.000245931	0.000160464	0	0	0.00461006	0.000143711	0	0	0.000917809	0	0.0106198	Allyl
CS76581	1	Qar-8a	0	0	0.000289527	0.000420099	0	0	0	0.0014465	0.000161956	0	0	0.000109111	0	0.001249	0	0.000211759	0.0171011	0.000188025	0	0	0.000607445	0.00194936	0.00839761	OH-But
CS76581	2	Qar-8a	0.00146252	0	0	0.000753562	0	0.00203011	0	0.002976	0.000110934	0	0	0.000126821	0.000338524	0.0012738	0.00026935	0.000610065	0.0123546	0.000381793	0	0	0.00252407	0	0.00928995	OH-But
CS76582	2	Ra-0	0.00338542	0	0	0	0	0	0	0	0	0	0	0	6.82108e-05	7.877e-05	0	0	0.0022879	0.00022946	0	0	0.00418069	0	0.00761964	3OHP
CS76582	1	Ra-0	0.00370531	6.4063e-05	0	0	0	0	0	0	0	0	0	0	0.00103358	0.000117596	0	0.000893799	0.0030552	0.000287555	0	0	0.00420168	0	0.00775451	3OHP
CS76583	2	Ragl-1	0.000934713	0.000869545	0	0	0	0	0	0	0	0	0	0	0.0106039	0.000109092	0	0	0.00188214	0.000515987	0	0	0.000979443	0	0.00339844	3MSO
CS76583	1	Ragl-1	0.000734642	0.00277163	0	0	0	0	0	0	0	0	0	0	0.0139246	0.000183873	0	0.000910361	0.00341388	0.000561363	0	0	0.00120012	0.00169418	0.0084316	3MSO
CS76584	1	Rd-0	0.000213055	0	0.00285914	0	0.000322848	0	6.89038e-05	0	0	0	0	4.87325e-05	0	0.00036585	0	0.00626479	0.0039942	0.000966583	0.000549343	0	0.0030405	0	0.00563546	4MSO
CS76584	2	Rd-0	0.000166148	0	0.0037512	0	0.000204933	0	0	0	0	0	0	0	0	0.000144049	0	0.00338926	0.00159794	0.000765414	0.000575763	0	0.00455953	0	0.00496992	4MSO
CS76588	2	RLD-1	0.00170334	0.00245527	0	0	7.05745e-05	0	0	0	0	0	0	0	0.00595771	0.000210774	0	0	0.00335559	0.000296194	0	0	0.00259225	0	0.00475632	3MSO
CS76588	1	RLD-1	0.00111671	0.00389332	0	0	8.9098e-05	0	0	0	0	0	0	4.99811e-05	0.0045218	0.000275113	0	9.54667e-05	0.00515682	1.21138e-05	0	0	0.00237335	0	0.00548239	3MSO
CS76590	2	Rome-1	0	0	0	0.00312839	0	0	0	0.000392447	5.45232e-05	0	0	7.96944e-05	0	0.000713934	0	0.00021849	0.00559456	0.000252005	0.000132331	0	0.00118181	0	0.00897731	OH-But
CS76590	1	Rome-1	0	0	0.00159133	0.00169559	0	0	0	0.00061907	0	0	0	9.66574e-05	0	0.000641748	0.00034145	0.000424449	0.00503151	0.000468474	0.000189216	0	0.00234379	0	0.0109393	OH-But
CS76591	1	Rou-0	8.06552e-05	0	0.00165075	0.00187964	0	0	0	0.000113054	0.000171971	0	0	0.000111219	0	0.000501083	0.000164138	0.000761903	0.00560522	0.000249246	0.000203835	0	0.00278112	0	0.0129537	OH-But
CS76591	2	Rou-0	0	0	0	0.00430833	0	0	0	0.000145617	0.000285157	0	0	4.10764e-05	0	0.000616404	0.000211892	0.000896922	0.00568439	0.000121585	0.000381738	0	0.00392514	0	0.0136633	OH-But
CS76594	1	Rubezhnoe-1	0.000787245	9.58971e-05	0	0	0	0.00146307	0	0	0	0	0	0	0.00624486	0.000197089	0	0	0.00603354	6.61674e-05	0	0	0.00233739	0	0.010081	Allyl
CS76594	2	Rubezhnoe-1	0.000883312	8.74872e-05	0	0	0	0.00193318	0	0	0	0	0	0	0.00360917	0.000126468	0	0	0.00364197	0.000382243	0	0	0.00206905	0	0.00868845	Allyl
CS76597	2	Se-0	0.000418144	0	0	0.000311932	0.000602497	0	0	0	0.000381734	0	1.83334e-05	0	0.00146397	0.000245428	0	0.0154812	0.00236087	7.03577e-05	0.000231709	0	0.0015089	0	0.00729741	4MSO
CS76597	1	Se-0	0.000132972	0	0.000125045	0	0.000219566	0	0	0	0.00021553	0	0	0	0.00197642	0.000331048	0	0.0107067	0.00531786	0	0.000213613	0	0.000637245	0.00204499	0.0114703	4MSO
CS76599	2	Sei-0	0.00196367	0	0	0	0	0	0	0	0	0	0	0	5.31226e-05	6.36956e-05	0	0	0.00216876	4.56132e-05	0	0	0.00510181	0	0.0123171	3OHP
CS76599	1	Sei-0	0.00379971	0	0	0	0	0	0	0	0	0	0	0	0.000556661	0.000144896	0	0	0.00413133	0.000161029	0	0	0.0065421	0	0.0109601	3OHP
CS76600	1	Sg-1	0.00017878	0	0.000668389	0	0.000177408	0	0	0	0	0	0	0	0	0.000176369	0	0.00539488	0.00185064	0.00017989	0.000331216	0	0.00172368	0	0.00490089	4MSO
CS76600	2	Sg-1	0.000462893	0	0.000801453	0	0.000403911	0	0	0	0	0	0	0	0	0.000134019	0	0.00899321	0.00120601	0.000164057	0.000472504	0	0.00273695	0	0.0056391	4MSO
CS76601	2	Si-0	0.000557173	0	0.00234996	0	0.000426093	0	0	0	0	0	0	0	0	0.000163785	0	0.00813227	0.00262891	0.000357777	0.000397281	0	0.00386404	0	0.0071491	4MSO
CS76601	1	Si-0	0.000332045	0	0.00146276	0	0.000379989	0	0	0	0	0	0	7.91334e-05	0	0.000494688	0	0.0104443	0.00449881	0.000405957	0.000557286	0	0.00288802	0	0.0077435	4MSO
CS76603	2	Sp-0	0.000233373	0	0.00231114	0	0.000271409	0	0	0	0	0	0	0	0	0.000257126	0	0.00535623	0.00264473	0.000251559	0.000609119	0	0.00335531	0	0.00593091	4MSO
CS76603	1	Sp-0	0.000141522	0	0.00130761	0	0.000123046	0	0	0	0	0	0	0	0	0.0002939	0	0.00460005	0.00282763	0.000234289	0.000506555	0	0.00239953	0	0.00782567	4MSO
CS76604	1	Sq-8	0.00113372	0.00139059	0	0	0	0	0	0	0	0	0	0	0.00770144	9.09787e-05	0	0.000149869	0.00277271	6.28605e-05	0	0	0.00145102	0	0.00639552	3MSO
CS76604	2	Sq-8	0.00708879	0	0	0	0	0	0	0	0	0	0	0	0.00016923	0.000240163	0	0	0.00322103	0.000450033	0	0	0.00589717	0	0.0112351	3MSO
CS76605	1	Stw-0	0.00426267	0	0	0	0	0	0	0	0	0	0	0	0.000368212	0.000123889	0	0.000173227	0.00367254	0.000281228	0	0	0.00610739	0	0.0110036	3OHP
CS76605	2	Stw-0	0.00239225	0	0	0	0	0	0	0	0	0	0	0	0	9.03248e-05	0	0	0.00252212	0.000148199	0	0	0.00639635	0	0.00954732	3OHP
CS76606	2	Su-0	0.000974994	0	0	0	0	0.000961695	0	0	0	0	0	0	0.000430573	0.000182795	0.000682446	7.97697e-05	0.0025205	0.000260353	0	0	0.00128543	0	0.00561893	Allyl
CS76606	1	Su-0	0.000692634	0	0	8.39154e-05	0	0.00101177	0	0	5.47813e-05	0	0	0	0.000669483	0.000118149	0	0.000118352	0.00545699	0.000391864	0	0	0.00223239	0	0.00749505	Allyl
CS76608	1	Ta-0	0.00473243	0	0	0	0	0	0	0	0	0	0	0	0.000511321	0.000101614	0	0.000107067	0.00240189	0.000208518	0	0	0.00562172	0	0.0100988	3OHP
CS76608	2	Ta-0	0.00398294	0	0	0	0	0	0	0	0	0	0	0	0	0.000103901	0	0	0.00227962	0.000417376	0	0	0.00512094	0	0.00923411	3OHP
CS76610	1	Tamm-2	0.00119201	0	0	0	0	0.00332893	0	0	0	0	0	0	0.000662474	0.000190975	0	9.32236e-05	0.00437687	0.000512268	0	0	0.00490366	0	0.00925255	Allyl
CS76611	2	Tha-1	0.00218248	0	0	0.000288066	0	0.00504388	0	5.88995e-05	0	0	0	0	0.000351382	0.000268488	0	0	0.0060091	0.000676598	0	0	0.00160758	0	0.011657	Allyl
CS76611	1	Tha-1	0.00146202	0	0.000115685	0.000117793	0	0.00176415	0	0	0	0	0	0	0.000227748	0.000141103	0	7.86059e-05	0.00492625	0.000491493	0.000268341	0	0.000646691	0.00179179	0.0155284	Allyl
CS76612	1	Ting-1	0.000778524	0	0	0	0.00123785	0	0	0	0	0	0	0	0.000106893	0.000284271	0	0	0.00494749	0.000329472	0	0	0.00306006	0	0.0105215	Butenyl
CS76615	2	Ts-1	0	0	0.000125941	0	0.000158714	0	0	0	0.000270852	0	0	0	0.000232121	0.000165742	0	0.00544755	0.00371862	0.000445489	0.000196294	0	0.001123	0	0.0112588	4MSO
CS76615	1	Ts-1	0	0	0	0	9.40793e-05	0	0	0	0.000218141	0	0	0	0.00019802	0.000199511	0	0.00439884	0.00393539	0.000153666	0.000192247	8.1514e-06	0.00125393	0	0.0140151	4MSO
CS76616	2	Tscha-1	0.00115862	0	0	0	0	0.00162222	0	0	0	0	0	0	9.15554e-05	0.000250315	0	0	0.00524209	3.8107e-05	9.76719e-05	0	0.00106682	0	0.00988124	Allyl
CS76616	1	Tscha-1	0.00131895	0	0	0	0.00171446	0	0	0	0	0	0	0	0.000131442	0.000236377	0	0	0.00446482	6.2962e-05	0	0	0.00310738	0	0.0106582	Allyl
CS76620	1	Uk-1	0.000160797	0	0.000969704	0	0.000207077	0	0	0	0	4.83656e-05	0	0	0	0.000600011	0	0.00592591	0.00425578	0.000231799	0.000693386	0	0.00295491	0	0.00754916	4MSO
CS76620	2	Uk-1	0.00038439	0	0.00138594	0	0.000374263	0	0	0	6.89871e-05	0	0	5.9225e-05	0	0.000852055	0	0.00710057	0.0058843	0.000231164	0.000757542	0	0.000993562	0	0.00663604	4MSO
CS76621	1	Uod-1	0.00774706	0	0	0	0	0	0	0	0	0	0	0	0.000758846	0.000202412	0	0.000201896	0.00517953	0.000347685	0	0	0.00727501	0	0.0138474	3OHP
CS76621	2	Uod-1	0.00371868	0	0	0	0	0	0	0	0	0	0	0	8.91763e-05	0.000112045	0	0	0.00265553	0.000311044	0	0	0.00460798	0	0.00772981	3OHP
CS76622	1	Utrecht	0.00249062	0	0	0	0	0	0	0	0	0	0	0	0.000662441	9.31552e-05	0	0	0.00245568	0.000215616	0	0	0.00631638	0	0.011641	3OHP
CS76622	2	Utrecht	0.00234989	0	0	0	0	0	0	0	0	0	0	0	0.000249697	7.5811e-05	0	0	0.00170265	0.000135871	0	0	0.00515091	0	0.00894918	3OHP
CS76624	2	Ven-1	0.000242912	0	0.000262635	0	0.000598799	0	0	0	0.000143119	0	0	0	0	0.000252647	0	0.00954752	0.00233199	0.000225694	0.000327296	0	0.000519245	0	0.00233966	4MSO
CS76624	1	Ven-1	0.000208261	0	0.000112886	0	0.000467653	0	0	0	0	0	0	8.3413e-05	0	0.000872681	0	0.00888781	0.00623679	0.000321974	0.000407952	0	0.00120234	0	0.00630351	4MSO
CS76625	1	Vind-1	0.000132356	0	0.00304521	0.00464536	0	0	0.000103832	0.00021183	0.000309254	0	0	0.000173926	0	0.000780731	0.000330192	0.00266029	0.00552913	0.000412012	0.000313581	0	0.00286396	0	0.0118878	OH-But
CS76625	2	Vind-1	0	0	0	0.00758205	0	0	0.000118857	8.69655e-05	0.000361191	0	0	0.000223135	0	0.000626512	0.000261678	0.000836276	0.00427841	0.000457766	0.00029984	0	0.00380995	0	0.00930098	OH-But
CS76626	1	Wa-1	0.000995073	0.000969704	0	0	0	0	0	0	0	0	0	0	0.00953658	0.000192091	0	0.000218973	0.00328909	0.000435987	0	0	0.000999773	0.00193543	0.00764799	3MSO
CS76626	2	Wa-1	0.00102848	0.000748499	0	0	0	0	0	0	0	0	0	0	0.00459176	0.00019463	0	0	0.00308789	0.000316088	0	0	0.00248563	0	0.00922437	3MSO
CS76627	2	Wc-1	0.00263564	0	0	0	0	0	0	0	0	0	0	0	0	7.55555e-05	0	0	0.00128823	0.000242999	0	0	0.00526359	0	0.00829437	3OHP
CS76627	1	Wc-1	0.00487691	0	0	0	0	0	0	0	0	0	0	0	0.000490389	0.000198783	0	0.000152952	0.00308161	0.000260115	0	0	0.00556255	0	0.0115512	3OHP
CS76628	2	Wei-0	0.00339614	0	0	0	0	0	0	0	0	0	0	0	0.000178534	0.000113613	0	0	0.00339602	9.79346e-06	0	0	0.00689474	0	0.0143901	3OHP
CS76628	1	Wei-0	0.00552378	0	0	0	0	0	0	0	0	0	0	0	0.000890036	0.000139793	0	0.000221499	0.00499621	5.86898e-06	0	1.16673e-05	0.00600023	0	0.0115932	3OHP
CS76630	2	Wl-0	0.00235534	9.99071e-05	0	0	0	0.00152377	0	0	0	0	0	0	0.000264353	0.000153935	0	0	0.00307611	0.000107835	0	0	0.00244425	0	0.00714848	Allyl
CS76630	1	Wl-0	0.00138114	0.000216639	0	0	0	0.00182167	0	0	0	0	0	0	0.00215031	0.000154919	0	0	0.00386474	9.69914e-06	0	0	0.00290675	0	0.00850595	Allyl
CS76632	2	Wt-5	0.000169369	0	0.000119057	0	0.000551154	0	0	0	0	0	0	0	0	0.000251968	0	0.0091629	0.00304384	0.000237795	0.000358134	0	0.0009159	0	0.00614391	4MSO
CS76632	1	Wt-5	0.000226963	0	0	0	0.000124829	0	0	0	0	0	0	0	0	0.000136775	0	0.00509221	0.00173822	0.000105382	0.000302639	0	0.000287676	0.00157955	0.00363984	4MSO
CS76635	1	Zdr-1	0.00996457	0	0	0	0	0	0	0	0	0	0	0	0.000825555	0.000167991	0	0.0015632	0.00500618	0.000434675	0	0	0.00681314	0	0.012485	3OHP
CS76635	2	Zdr-1	0.00498156	0	0	0	0	0	0	0	0	0	0	0	4.11248e-05	7.0232e-05	0	0	0.00159313	0.000571467	0	0	0.00556154	0	0.00905623	3OHP
CS76640	2	11C1	0	0	0	0.00416147	0	0	0	0	0.000422824	0	0	3.66888e-05	0	0.000409379	7.93411e-05	0.000275474	0.00290565	0.000298982	0.00018593	0	0.00324575	0	0.00851878	OH-But
CS76640	1	11C1	0	0	0.00157188	0.00182221	0	0	0	0	0.00053101	0	0	0	0	0.000511316	0.000201677	0.000993767	0.00373211	0.000342638	0.000382053	0	0.00343975	0	0.0111864	OH-But
CS76642	1	IP-Ace-0	0.000316777	0	0.00100695	0.00131795	0.000915133	0	0	0.000207499	0	0	0	0	0	0.000133225	0	0.00265106	0.00412732	0.000373382	0	0	0.00202467	0	0.0137386	OH-But
CS76642	2	IP-Ace-0	0.000539454	0	0	0.00277917	0	0.00147569	0	0.000163644	0	0	0	0	0	0.000151614	0	0.00327233	0.00325247	0.000247315	0	0	0.0022353	0	0.00940397	OH-But
CS76644	1	??dal 3	0.000813254	0	0	0	0	0.00111659	0	0	0.000100356	0	0	0	4.52789e-05	0.000218694	0	2.70155e-05	0.0114928	0	0	0	0.00266679	0.00383959	0.0168346	Allyl
CS76646	1	IP-Adc-5	0.000353935	0	0	0	0	0.000636625	0	0	5.252e-05	0	0	0	0	0.000447974	0	0	0.0160643	8.58099e-05	0	0	0.000801912	0.00236865	0.0158492	Allyl
CS76646	2	IP-Adc-5	0.00106692	0	0	7.29246e-05	0	0.000936088	0	0	4.29927e-05	0	0	0	0.000300534	0.00030268	0	0	0.0069009	0.000312377	0	0	0.00316342	0	0.0143397	Allyl
CS76647	1	IP-Adm-0	0	0	0.00251644	0.00317497	0	0	0	0.000377799	0.000135182	0	0	7.56081e-05	0	0.000822531	0	0.00138475	0.00792972	0.00052241	0.000342775	0	0.00435295	0	0.0107798	OH-But
CS76647	2	IP-Adm-0	0	0	0	0.00609106	0	0	0	0.000463064	0.000192177	0	0	8.1371e-05	0	0.000649051	0.000247258	0.00133229	0.00603455	0.000305942	0.000299044	0	0.00426007	0	0.00773754	OH-But
CS76648	2	Aiell-1	0	0	0	0.00361328	0	0	0.000147038	0	0	0	0	0	0	0.000183597	0	0.0068236	0.0034545	0.000133197	0.00053895	0	0.00222613	0	0.00823098	OH-But
CS76648	1	Aiell-1	0	0	0.00144631	0.00242386	0	0	0	0.000201262	0	0	0	3.88119e-05	0	0.000394751	0	0.00334459	0.00459315	0.000288583	0.000270053	0	0.00266211	0	0.0124052	OH-But
CS76650	1	IP-Ala-0	0	0	0.0021889	0.00154283	0	0	0	0.00205121	0	0	0	7.36167e-05	0	0.000442284	0.000262569	0.00406007	0.00342422	0.000294808	0.00049713	0	0.0032867	0	0.0104354	OH-But
CS76650	2	IP-Ala-0	0	0	0	0.00401085	0	0	0	0.00186025	0	0	0	6.34491e-05	0	0.000396332	0.00033062	0.00189464	0.00294618	0.000284201	0.000494064	0	0.00337275	0	0.0106565	OH-But
CS76651	1	Ale-Stenar-41-1	0.000317301	0	0	0	0	0.000169958	0	0	0.000125656	0	0	0	4.32368e-05	0.00013701	0	0	0.00548313	0.000106673	0	0	0.00131281	0	0.0125669	Allyl
CS76652	1	Ale-Stenar-44-4	0.000349081	0	0	0	0	0.000290329	0	0	0.000112038	0	0	0	3.84241e-05	0.000225887	0	0	0.0066682	0.000194758	0	0	0.00106278	0.00265672	0.0119043	Allyl
CS76654	1	Ale-Stenar-64-24	0.000526369	0	0	0	0	0.00019004	0	0	0	0	0	6.29702e-05	0	0.000654382	0	0	0.013484	0	0	0	0.00124037	0.00375148	0.0139302	Allyl
CS76656	1	Aledal-6-49	0.000372087	0	0	0	0	0.000220289	0	0	0	0	0	0	0.000193252	0.000207308	0	0	0.00582731	0.00036617	0	0	0.000867815	0	0.0128797	Allyl
CS76659	1	IP-All-0	0.00014715	0	0.00141117	0.00274767	0	0	0	0.00017501	0.00035098	6.14695e-05	0	0	0	0.000451006	5.07202e-05	0.00555701	0.00393755	0.000226915	0.000150038	1.38588e-05	0.00237727	0	0.00935998	OH-But
CS76659	2	IP-All-0	0.000170638	0	0	0.00289713	0	0	0	0.000158456	0.000234424	0	0	0	0	0.000308594	5.78158e-05	0.00511343	0.00334602	9.90377e-05	0.000239116	0	0.00121767	0	0.0066379	OH-But
CS76660	1	IP-Alm-0	0.000207088	0	0	0.000193332	0	0.000469289	0	0	7.45984e-05	0	0	0	0	0.000478752	0	0.000239031	0.0120949	0	0	0	0.000603967	0.00230626	0.0146002	Allyl
CS76660	2	IP-Alm-0	0.000706436	0	0	0.00102022	0	0.00161048	0	0.000284142	0.000116663	0	0	0	6.18871e-05	0.000640935	0.000745575	0.00043527	0.00942719	0.000101389	0	0	0.00106655	0	0.0126931	Allyl
CS76662	2	IP-Alo-0	0.000346151	0	0	0.00187154	0	0.000608023	0	0.000145015	0	0	0	2.76617e-05	0	0.000380169	0	0.0013564	0.00487168	0.000398604	0.000213896	0	0.00231045	0	0.00733518	OH-But
CS76662	1	IP-Alo-0	0.000191792	0	0.000849107	0.00120739	0	0.000416167	0	0.000192973	7.22144e-05	0	0	8.38716e-05	0	0.000906992	0.000106853	0.00146011	0.010731	0.000356345	0.000195861	0	0.00116488	0.00373825	0.0113388	OH-But
CS76663	2	Alt-1	0.00163373	0	0.000117479	0	0	0.00172665	0	0	0	0	0	0	5.21808e-05	0.000153915	0	0	0.00332341	0.000373083	0	0	0.00215023	0	0.00650103	Allyl
CS76663	1	Alt-1	0.00232955	0.000107507	0	0	0	0.00300293	0	0	0	0	0	0	0.000907247	0.00016601	0	0.000887166	0.0040773	0.000352744	0	0	0.00363009	0	0.0106702	Allyl
CS76665	1	??ngs??-74-430	0.000321351	0	0	0	0	0.000697897	0	0	4.1926e-05	0	0	0	0.000204121	0.000245475	0	0	0.00538817	0.000448123	0	0	0.000666291	0	0.0064389	Allyl
CS76667	2	App1-12	0.00273014	0	0	0	0	0	0	0	0	0	0	0	6.40704e-05	0.000134771	0	0	0.00280023	0.000517081	0	0	0.00450746	0	0.0123223	3OHP
CS76667	1	App1-12	0.00203013	0	0	0	0	0	0	0	0	0	0	0	0.000174909	0.000116085	0	0.000226573	0.00342455	0.000428143	0	0	0.00370218	0	0.0139184	3OHP
CS76668	2	App1-14	0.00172302	0.00011798	0	0	0	0.00389459	0	0	0	0	0	0	0.000660726	0.000129197	0	0	0.00380957	0.000361016	0	0	0.00238045	0	0.00859913	Allyl
CS76668	1	App1-14	0.00150603	0	8.42681e-05	0	0	0.00156933	0	0	6.12394e-05	0	0	0	0.000282937	0.000299953	0	5.15231e-05	0.00538275	0.000489457	0	0	0.00323947	0	0.0138155	Allyl
CS76669	2	App1-16	0.00104811	0	0	0	0	0.0011686	0	0	0	0	0	0	0.000481517	0.000105546	0	0	0.002658	0.000417403	0	0	0.00258703	0	0.00932672	Allyl
CS76669	1	App1-16	0.000525726	0	0	0	0	0.00069459	0	0	5.53264e-05	0	0	0	0.000379133	0.000131235	0	0	0.00491694	0.000433979	0	0	0.00113117	0.00214544	0.0116776	Allyl
CS76671	2	IP-Are-0	0.00116572	0	0	7.82178e-05	0	0.00194442	0	0	6.37221e-05	0	0	0	0.000348978	0.000255286	5.63848e-05	0	0.00645065	0.000358275	0	0	0.00125512	0	0.00789004	Allyl
CS76671	1	IP-Are-0	0.00113264	0	0	0	0	0.00126217	0	0	4.96916e-05	0	0	0	0.000338088	0.000279614	0	7.38045e-05	0.00771175	0.000272232	0	0	0.00241452	0	0.0153802	Allyl
CS76672	1	ARGE-1-15	0.000477034	0	0.00269366	0.00399716	0	0	0	7.39314e-05	0.000138217	0	0	9.45483e-05	4.51906e-05	0.000887176	0.000200115	0.00357997	0.00653234	0.000516104	0.000460068	0	0.00454362	0	0.0111985	OH-But
CS76672	2	ARGE-1-15	0.000567211	0	0	0.00492509	0	0	0	0	0.000163615	0	0	3.27552e-05	0	0.000542134	6.83511e-05	0.00122783	0.00436151	0.000305597	0.000324107	0	0.00421181	0	0.00787591	OH-But
CS76673	2	ARR-17	0	0	0	0.00816592	0	0	0	0.000169791	0.000747413	0	0	0	0	0.000326091	9.23408e-05	0.00302506	0.00338564	0.00038332	0	0	0.00332784	0	0.00909478	OH-But
CS76673	1	ARR-17	0	0	0.00108599	0.00216636	0	0	0	0.000143074	0.000440066	0	0	0	0	0.000454742	0	0.00176458	0.00498544	0.000442024	3.47056e-05	0	0.000940078	0	0.00768042	OH-But
CS76674	1	IP-Aru-0	0.000897221	0	0	7.79374e-05	0.000991703	0	0	0	0	0	0	0	6.1171e-05	9.62698e-05	0	5.76452e-05	0.00295058	0.000307765	0	0	0.00137061	0.00129812	0.00701651	Allyl
CS76674	2	IP-Aru-0	0.00121346	0	0	8.08435e-05	0	0.0024917	0	9.13627e-05	0	0	0	0	0	0.000127621	0	0	0.00263547	0.000191742	0	0	0.00165202	0	0.00593537	Allyl
CS76675	2	IP-Aul-0	0.000857862	0	0	0	0	0.00105211	0	0	3.71874e-05	0	0	0	0.000158355	0.000189597	0	0	0.0052752	0.000359219	0	0	0.00213135	0	0.0116138	Allyl
CS76676	1	B?1-2	0.00214909	0	0	0	0	0.00353534	0	0	0	0	0	0	0.00041401	0.00017057	0	0.000707657	0.00457801	0.000176546	0	0	0.0036894	0	0.00867464	Allyl
CS76676	2	B?1-2	0.00221873	0	0	0	0	0.00217061	0	0	0	0	0	0	5.98386e-05	0.000117051	0	0	0.00380573	0.000268014	0	0	0.00299708	0	0.0108579	Allyl
CS76677	2	B?4-1	0.00199421	0	0.000207405	0	0	0.002936	0	0	0	0	0	2.38875e-05	9.87465e-05	0.000486583	0	0	0.00670032	0.000145893	0	0	0.00123652	0	0.0105641	Allyl
CS76677	1	B?4-1	0.00127157	0	0.000109861	0	0.00222929	0	0	0	0	0	0	0	0.000173374	0.000437817	0	0	0.00846818	0.000192825	0	0	0.00160917	0.00282668	0.0118582	Allyl
CS76678	2	B?5-1	0.00167208	0	0	0.000102752	0	0.00282503	0	0	0	0	0	0	0.000218105	0.000288579	0	0	0.00562051	0.000159824	0	0	0.00408393	0	0.0102251	Allyl
CS76678	1	B?5-1	0.00139098	0	0.000124015	0	0	0.00185339	0	0	0	0	0	0	0.000341532	0.000345559	0	0	0.00708087	9.33418e-05	5.44049e-05	0	0.00296186	0	0.0116042	Allyl
CS76679	1	Bach-7	0.00185643	0	0	0	0	0.00241629	0	0	4.64767e-05	0	0	0	0.000763422	0.00014209	0	0	0.00339826	0.000284844	0	0	0.00361111	0	0.0106231	Allyl
CS76679	2	Bach-7	0.00122058	0	0	0	0	0.00150965	0	0	5.25692e-05	0	0	0	0.000119294	0.000173649	0	0	0.00247545	0.000225216	0	0	0.00274899	0	0.0110815	Allyl
CS76681	1	IP-Bae-0	0	0	0.00128167	0.00104416	0	0	0	0.001396	0	0	0	9.37539e-05	0	0.000405765	0.000269271	0.00359164	0.00252449	0.000204337	0.000413136	0	0.000831917	0	0.00369558	OH-But
CS76681	2	IP-Bae-0	0	0	0	0.00241618	0	0	0	0.00172796	0	0	0	2.64963e-05	0	0.000280673	0.000377082	0.00292994	0.00213948	0.00012861	0.000297883	0	0.000931553	0	0.00251386	OH-But
CS76682	2	Bai-10	0.0029617	0	0	0	0	0.00281756	0	0	0	0	0	0	0.000295834	0.00014731	0	0	0.00304529	0.000225164	0	0	0.00272983	0	0.00535362	Allyl
CS76682	1	Bai-10	0.00214709	0.000375975	0	0	0	0.00365621	0	0	0	0	0	0	0.00293952	0.000219137	0	0.00108574	0.00432164	0.000211641	0	0	0.00332725	0	0.00921276	Allyl
CS76688	1	Bar 1	0.000759912	0	0	0	0	0.000945805	0	0	0.000106349	0	0	0	0	0.000287559	0	0	0.00841834	0	0	0	0.00126932	0	0.0101434	Allyl
CS76689	1	IP-Bar-1	8.25843e-05	0	0.000442506	0.00145642	0	0	0	0.000367296	0.000615997	0	0	8.22503e-05	0	0.000814735	0	0.00073562	0.0108382	0	0	0	0.00210236	0	0.0168444	OH-But
CS76689	2	IP-Bar-1	0.000316939	0	0	0.00213459	0	0.000604102	0	0.000730903	0.000337284	0	0	7.69104e-05	0	0.000766983	0	0.000924616	0.00705683	0.000144441	5.99936e-05	0	0.000722447	0	0.010029	OH-But
CS76690	2	Basen-1	0.0012813	8.8724e-05	0	0.00033971	0	0.00543969	0	6.65016e-05	0	0	0	0	0.00139965	0.000135611	5.64638e-05	0	0.00303382	0.000287215	0	0	0.00325677	0	0.00979777	Allyl
CS76690	1	Basen-1	0.00126751	0.00017454	0.000149388	0	0	0.00350646	0	0	0	0	0	0	0.00237228	0.000110029	0	0.000132049	0.00310569	0.000194342	0.000253062	0	0.00317811	0	0.0113972	Allyl
CS76694	2	BAU-15	0	0	0	0.00289214	0	0	0	0	5.63565e-05	0	0	0.000123376	0	0.000655083	9.11839e-05	0.000634734	0.00322248	0.000129203	9.20845e-05	0	0.00153995	0	0.00634926	OH-But
CS76694	1	BAU-15	0	0	0.00121713	0.00210454	0	0	0	0.00016502	0.000229149	0	0	5.74759e-05	0	0.000543988	0.000226294	0.00180188	0.00680358	0.000404166	0	0	0.0032532	0	0.0132966	OH-But
CS76695	1	IP-Bea-0	0	0	0.00182058	0.00138685	0	0	0	0.00105385	0	0	1.36029e-05	0	0	0.000257817	0.000210596	0.00171021	0.00244099	0.000211973	0.000312083	0	0.00220615	0	0.00699842	OH-But
CS76695	2	IP-Bea-0	0.00171289	0	0	0	0	0.00128228	0	0	0	0	0	0	0.000177851	0.000313474	0.00126685	6.71856e-05	0.0033208	0.000299302	0	0	0.00061334	0	0.0061585	OH-But
CS76695	2	IP-Bea-0	0	0	0	0.00406403	0	0	0	0.00141791	6.77581e-05	0	0	0.00013429	0	0.000559497	0.000576655	0.000936145	0.00680551	0.00028743	0.000139417	0	0.00334084	0	0.0135865	OH-But
CS76697	1	Bela-2	0.000654456	0	0	0	0	0.000739723	0	0	0	0	0	0	7.26721e-05	0.000346509	0	3.48965e-05	0.00820026	0.000670883	0	0	0.000935522	0.00311103	0.0148619	Allyl
CS76697	2	Bela-2	0.00151267	0	0	0.000529631	0	0.00246605	0	0	0	0	0	0	0.000140926	0.000226801	0.00088599	0.00015731	0.00449494	0.000380482	0	0	0.00078461	0	0.0080569	Allyl
CS76699	1	Bela-4	0.0007765	0	0	0	0	0.00231608	0	6.57385e-05	0	0	0	0	0.000301738	0.000122931	0	0	0.00327139	0.000293012	0	0	0.00304992	0	0.00757403	Allyl
CS76699	2	Bela-4	0.00148727	0	0	0	0	0.00600576	0	0.000138738	0	0	0	0	0.000342602	0.000144234	0.000854728	0	0.00184927	0.000319543	0	0	0.00195056	0	0.00306878	Allyl
CS76700	1	IP-Ben-0	0.000191759	0	0.00143765	0.00157851	0	0.000309193	0	0.000293277	0.000219909	0	0	0	0	0.000719553	0	0.000360103	0.00564699	0.000444881	0.000134738	0	0.00377574	0	0.00914249	OH-But
CS76700	2	IP-Ben-0	0.000402567	0	0	0.00546146	0	0	0	0.000313627	0	0	0	0.000150852	0	0.000781932	0.000502402	0.000566009	0.00487006	0.000458396	0.000141449	0	0.00453734	0	0.00780793	OH-But
CS76701	2	Berg-1	0.00152966	0	0	0	0	0.00131548	0	0	0	0	0	0	0.000278936	0.0001831	0	0	0.00209113	0.000120985	0	0	0.00377098	0	0.00877437	Allyl
CS76701	1	Berg-1	0.0017459	0.000563025	0	0	0	0.00221799	0	0	0	0	0	0	0.00451042	0.000225808	0	0.000760295	0.00447478	1.75998e-05	0	0	0.00353067	0	0.00932967	Allyl
CS76703	2	BEZ-9	0	0	0	0.0108743	0	0	0	0.000742426	0.000238205	0	0	7.07795e-05	0	0.000387909	0.000269322	0.00128558	0.00263513	0.000764333	0	0	0.00347537	0	0.00890274	OH-But
CS76703	1	BEZ-9	0	0	0.00197031	0.00286522	0	0	0	0.000278961	0.000108804	0	0	4.53617e-05	0	0.000378489	0	0.00131866	0.0037526	0.000347993	0.000114778	0	0.00288901	0	0.0121044	OH-But
CS76706	2	BI-4	0.00162093	0	0	0	0	0.00181298	0	0	0	0	0	0	0.00020589	0.000174758	0	0	0.00330299	7.96784e-05	0	0	0.00393392	0	0.00825467	Allyl
CS76706	1	BI-4	0.00195975	0.000138136	0	0	0	0.00260312	0	0	0	0	0	0	0.0017184	0.000213656	0	0	0.00423306	0.000150729	0	0	0.00410952	0	0.008756	Allyl
CS76711	2	IP-Bis-0	0.00147031	0	0	7.08403e-05	0	0.00379777	0	0.000111156	8.90392e-05	0	0	0	0.000126961	0.000247288	0	0	0.00734437	0.000353276	0	0	0.00279841	0	0.0125829	Allyl
CS76711	1	IP-Bis-0	0.00145583	0	0	0	0	0.00286213	0	0.000103382	5.55299e-05	0	0	0	0.000369585	0.000353719	0	7.95418e-05	0.00925838	0.000540209	0	0	0.000823504	0	0.0166422	Allyl
CS76712	1	Bisig-1	0	0	0.000588705	0.000935747	0	0	0	0.000417801	0	0	0	0	0.000553633	0.000170804	7.77502e-05	0.000480091	0.00287247	3.51306e-05	0	0	0.00105708	0	0.00824478	OH-But
CS76712	2	Bisig-1	0.00035313	0	0	0.00362395	0	0	0	0.00120783	0	0	0	2.54193e-05	0.00130873	0.000378376	0	0.000601563	0.00540686	0.000135738	0.000261704	0	0.000932604	0	0.00865488	OH-But
CS76713	2	Bivio-1	0	0	0	0.00515984	0	0	0	0.000333134	0	0	0	3.12528e-05	0	0.000420368	0	0.00417127	0.00386074	6.66679e-05	0.000372916	0	0.00343958	0	0.011355	OH-But
CS76714	1	IP-Boa-0	0.000840311	0	0	0	0	0.00122703	0	0	5.60474e-05	0	0	0	0.000159671	0.000227376	0	0	0.00801077	0.0001718	0.000154344	0	0.00118047	0	0.017506	Allyl
CS76714	2	IP-Boa-0	0.00161379	0	0	0.000117495	0	0.00280737	0	0	5.7209e-05	0	0	0	0.000138646	0.000182723	0	0	0.00652661	0.000210741	0	0	0.00324412	0	0.0160995	Allyl
CS76715	1	B??n 1	0.00099347	0	0	0	0	0.002009	0	0	4.17936e-05	0	0	0	0.000344171	0.000333677	0	3.82651e-05	0.00573239	0.000598221	0	0	0.0017861	0.00337482	0.0146542	Allyl
CS76715	2	B??n 1	0.00216914	0	0	7.05988e-05	0	0.00494726	0	0	0	0	0	0	0.000306692	0.000204312	0	0	0.00354659	0.000571028	0	0	0.0033827	0	0.0109809	Allyl
CS76717	2	IP-Bor-0	0	0	0	0.000933773	0.00158431	0.000655949	0	0.000333645	6.23034e-05	0	0	0	0	0.000566713	0.000193061	0.000991361	0.00551848	0.000276725	0.000164558	0	0.00269768	0	0.0096325	OH-But
CS76717	1	IP-Bor-0	0	0	0	0	0	0	0	0	0	0	0	0	0	0	0	0	7.03577e-05	0	0	0	0	0	0	OH-But
CS76718	1	Borky1	0.00311066	0	0	0	0	0	0	0	0	0	0	0	0.000151093	0.000155546	0	0.000216875	0.00364258	0.000266529	0	0	0.0036797	0	0.0104015	3OHP
CS76718	2	Borky1	0.00355004	0	0	0	0	0	0	0	0	0	0	0	0.000226057	0.000158548	0	0.000967637	0.00347661	0.000312232	0	0	0.00520051	0	0.0153448	3OHP
CS76719	1	IP-Bos-0	0	0	0.00101756	0.00101606	0	0	0	0	0	0	0	0	0	0.000158088	5.96617e-05	0.000826727	0.00175369	0.000152456	0	0	0.00176309	0	0.00548118	OH-But
CS76719	2	IP-Bos-0	0.000247093	0	0	0.00349129	0	0	0	0.000123441	0	0	0	2.25723e-05	0	0.000289266	0	0.000757039	0.00276874	0.000263491	0.000200655	0	0.00359809	0	0.0084162	OH-But
CS76720	1	B??t 1	0.00052633	0	0	0	0	0.000646098	0	0	0	0	0	0	0	0.000218501	0	0	0.00336494	0	0	0	0.00154975	0.00313242	0.0128461	Allyl
CS76721	2	IP-Bra-0	0.00189965	0.000328767	0	0	0	0.0045576	0	0	0	0	0	0	0.00183356	0.000403063	0.000952975	0	0.00669129	0.0010341	0	0	0.000841816	0	0.00989094	Allyl
CS76721	1	IP-Bra-0	0.00079776	0	0	0	0	0.00150529	0	0	0	0	0	3.6142e-05	0.000254044	0.000363505	0	0	0.0080515	0.000760555	0	0	0.00122438	0	0.0143945	Allyl
CS76722	2	Bran-1	0.00119975	0	0	0.000153717	0	0.00185412	0	0	0	0	0	0	0.000508904	0.000175565	0	0	0.00377241	0.000222217	0	0	0.00327113	0	0.0109356	Allyl
CS76722	1	Bran-1	0.000444444	0	0	0	0	0.00161379	0	0	0	0	0	0	0.000327616	0.000201396	0	0	0.00511693	0.000212146	0	0	0.000817426	0	0.0121254	Allyl
CS76725	1	BRI-2	0.000208646	0	0.00194267	0.00259802	0	0	0	0	0.000142034	0	0	8.32911e-05	4.06489e-05	0.000726771	0	0.00254902	0.00533822	0.000437343	0.00039094	0	0.0036888	0	0.0109246	OH-But
CS76725	2	BRI-2	0.000125984	0	0	0.00477049	0	0	0	0	0.000284645	0	0	3.63967e-05	0	0.000618473	5.41617e-05	0.000539399	0.0047488	0.000203354	0.00026466	0	0.00123441	0	0.00384908	OH-But
CS76726	2	Br??1-6	0.00139193	0	0	0	0	0.00407862	0	0	0	0	0	0	0.000183517	0.00027695	0.00100513	0	0.00618605	0.000853853	0	0	0.00248556	0	0.00528789	Allyl
CS76726	1	Br??1-6	0.000879715	0	0	0	0	0.00312941	0	0	0	0	0	0	0.000130389	0.000472534	0	0	0.00994811	0.000734822	0	0	0.0022795	0.00289515	0.00917801	Allyl
CS76727	1	Br??sarp-11-135	0.000282056	0	0	0	0	8.91956e-05	0	0	5.07328e-05	0	0	0	0	0.000135925	0	0	0.00669141	0	0	0	0.000548081	0.00159439	0.0105723	3OHP
CS76727	2	Br??sarp-11-135	0.000962996	0	0	0	0	0.000288995	0	0	5.32329e-05	0	0	0	0	0.000247057	0.000803984	0	0.00590885	0.000309845	0	0	0.0010013	0.00190264	0.00923576	3OHP
CS76728	2	Br??sarp-15-138	0.00169779	0.00034993	0	0	0	0	0	0	0	0	0	0	0.00475728	0.000139655	0	0	0.00201213	6.01457e-05	0	0	0.00230259	0	0.00453166	3MSO
CS76728	1	Br??sarp-15-138	0.000952634	0.000753882	0	0	0	0	0	0	0	0	0	0	0.00748494	0.000178535	0	0.000119646	0.00433483	3.03907e-05	0	0	0.00271197	0	0.00888377	3MSO
CS76730	1	Br??sarp-34-145	0.00063832	0	0	0	0	0.000925875	0	0	0	0	0	0	0.000139215	0.000100532	0	2.44287e-05	0.00432343	0.000269965	0	0	0.00138679	0.0020962	0.00815959	Allyl
CS76734	2	Bur-0	0.00044731	0	0	0.00163277	0	0.000773162	0	0.00147976	0.000394496	0	0	9.73503e-05	0	0.00110075	0.000212204	0.00230221	0.00638907	9.49773e-05	0	0	0.000637233	0	0.0136172	OH-But
CS76734	1	Bur-0	0.000278948	0	0.000594003	0.000946698	0	0	0	0.00114492	0.000452884	0	0	0.000142321	0	0.00120054	0.000394946	0.00178475	0.00772276	0	0	1.05058e-05	0.00297242	0	0.0148375	OH-But
CS76736	2	IP-Bus-0	0.00143831	0	0	0.000117586	0	0.00196149	0	0	0	0	0	0	0.000157358	0.000218287	0	0	0.00473178	0.000399042	0	0	0.00419352	0	0.0133199	Allyl
CS76738	2	IP-Cab-3	0	0	0	0.00206898	0	0	0	0	0.000618955	0	0	0	0	0.000396653	0	0.00132603	0.0053222	0.000154372	0	0	0.00214159	0	0.0104237	OH-But
CS76738	1	IP-Cab-3	0	0	0.000437003	0.00109142	0	0	0	0	0.000445928	0	0	0	0	0.000593694	0	0.0007611	0.00613393	0.000276887	0	0	0.000972341	0.00312036	0.0150966	OH-But
CS76739	2	IP-Cad-0	0.00105576	0	0	0	0	0.00133571	0	0	5.00272e-05	0	0	0	0.000313302	0.000312165	0	0	0.00703562	0.000315117	0	0	0.00233216	0	0.0120841	Allyl
CS76739	1	IP-Cad-0	0.000801425	0	0	0	0	0.00117799	0	0	6.02181e-05	0	0	0	0.000338232	0.000513681	0	0.000129545	0.00970828	0.000334003	0	0	0.00113583	0.00339118	0.0151389	Allyl
CS76740	1	Can-0	0.00273637	0	0	0	0	0	0	0	0	0	0	0	0.000194167	0.000243698	0	0.00108188	0.0048745	0.000185628	0	0	0.00433094	0	0.0105275	3OHP
CS76740	2	Can-0	0.00236682	0	0	0	0	0	0	0	0	0	0	0	8.54751e-05	0.000182503	0	0	0.00281129	0.000230763	0	0	0.00356258	0	0.00755146	3OHP
CS76741	1	IP-Cap-1	0.000429033	0	0	0	0	0.000761304	0	0	0	0	0	0	4.55712e-05	0.000101032	0	0	0.00432929	0.000592604	0	0	0.00109048	0.00214412	0.0096449	Allyl
CS76741	2	IP-Cap-1	0.00121646	0	0	7.46106e-05	0	0.00221073	0	0	0	0	0	0	0.000228088	0.000212941	0	0	0.00621481	0.000980669	0	0	0.00305262	0	0.0122	Allyl
CS76742	2	IP-Car-1	0.000171342	0	0	0.00961105	0	0	0	0.000479734	0.000124405	0	0	6.61162e-05	0.000479461	0.000533694	0	0.00204118	0.00740566	0.00049366	0.000296052	0	0.00302537	0	0.010102	OH-But
CS76742	1	IP-Car-1	7.95022e-05	0	0.00134677	0.00208682	0	0.000213501	0	0.00016122	7.86209e-05	0	0	0	0.000464291	0.000338085	0	0.00080504	0.00634376	0.000569468	0.000186425	0	0.00237344	0	0.0137109	OH-But
CS76743	1	IP-Cas-0	0.000313951	0	0.00153891	0.00234729	0	0	0	6.96035e-05	0.000202037	0	0	0.00016352	4.46274e-05	0.000837616	0	0.00029675	0.00981302	1.7493e-05	0.000156943	0	0.00474628	0	0.0122899	OH-But
CS76743	2	IP-Cas-0	0.000589106	0	0	0.00734001	0	0	0	0.000377264	0.000234572	0	0	0.000203069	0	0.00120367	0.000438007	0.000403091	0.00815268	0.00032509	0.000196104	0	0.00208374	0	0.00815785	OH-But
CS76744	2	Castelfed-1-195	0.00212828	0	0	0	0	0.00723293	0	0.00015712	0	0	0	0	0.00075311	0.000195909	0.00140766	0	0.00289381	0.000278339	0	0	0.00101553	0	0.00702389	Allyl
CS76744	1	Castelfed-1-195	0.00146216	0	0	0	0	0.00289764	0	0	4.52498e-05	0	0	0	0.00020359	0.000105967	0	0.000110653	0.00272361	0.000226509	0	0	0.00245909	0.00347135	0.0109439	Allyl
CS76745	2	Castelfed-1-196	0.00147712	0	0	0	0	0.00393843	0	0	0	0	0	0	0.000501281	0.000142186	0.000830215	0	0.00169973	0.0002398	0	0	0.0028183	0	0.00398754	Allyl
CS76745	1	Castelfed-1-196	0.000943709	0	0	0	0	0.00192871	0	0	9.69326e-05	0	0	0	5.36145e-05	0.000104656	0	3.9465e-05	0.00293109	0.000260679	0	0	0.00212017	0.00340567	0.0106605	Allyl
CS76746	1	Castelfed-1-197	0.00107365	0	0	0	0	0.00245973	0	0	5.41339e-05	0	0	0	4.1328e-05	0.000159689	0	6.2762e-05	0.00341725	0.000246694	0	0	0.000650134	0	0.00732977	Allyl
CS76746	2	Castelfed-1-197	0.00226254	0	0	0	0	0.00661192	0	9.26862e-05	0	0	0	0	0.000588734	0.000198594	0.00109085	7.75144e-05	0.00230018	0.000326834	0	0	0.000955634	0	0.00614887	Allyl
CS76747	2	Castelfed-1-198	0.0018307	0	0	0	0	0.00538889	0	0.000103153	0	0	0	0	0.000475677	0.000188814	0	0	0.00259952	0.000276616	0	0	0.00350662	0	0.0113926	Allyl
CS76747	1	Castelfed-1-198	0.00113659	0	0	0	0	0.00240717	0	0	4.198e-05	0	0	0	9.48933e-05	8.91295e-05	0	4.45785e-05	0.00234338	0.000197385	0	0	0.00354437	0	0.0114555	Allyl
CS76748	1	Castelfed-1-199	0.00119583	0	0	0	0.00239489	0	0	0	0	0	0	0	0.000120337	8.47094e-05	0	5.31038e-05	0.00202088	0.00017245	0	0	0.00361843	0	0.00995015	Allyl
CS76748	2	Castelfed-1-199	0.00137153	0	0	0	0	0.00215221	0	0	0	0	0	0	9.74357e-05	0.000102732	0	0	0.00155651	6.52582e-05	0	0	0.00255975	0	0.00522026	Allyl
CS76749	1	Castelfed-2-200	0.000610514	0	0	0	0	0.000660515	0	0	4.68113e-05	0	0	0	0.000629004	0.000252005	0	9.25207e-05	0.00502512	0.000292533	0	0	0.00150633	0.00204875	0.00858058	Allyl
CS76749	2	Castelfed-2-200	0.00178507	0	0	0	0	0.00202245	0	0	9.37653e-05	0	0	0	0.000824736	0.000467223	0.000569502	0.000156649	0.00685983	0.000489171	0	0	0.00206968	0.00338732	0.0127788	Allyl
CS76750	1	Castelfed-2-201	0.000629275	0	0	0	0	0.00211214	0	0	4.94195e-05	0	0	0	0.000824714	0.00043795	0	0.000100636	0.00802118	0.000390508	0	0	0.00206419	0	0.0141109	Allyl
CS76750	2	Castelfed-2-201	0.00119238	0	0	0	0	0.00138964	0	0	5.43027e-05	0	0	0	0.000586166	0.00027629	0.000379409	7.06206e-05	0.00463947	0.000297904	0	0	0.00141597	0.00214645	0.00850098	Allyl
CS76751	1	Castelfed-2-202	0.000994021	0	0	0	0	0.00124906	0	0	0.000117272	0	0	0	0.000133686	0.000215304	0	8.65626e-05	0.00732267	0.000254701	0	0	0.00159961	0.00364319	0.0172691	Allyl
CS76751	2	Castelfed-2-202	0.00249817	0	0	0	0	0.00398758	0	0	8.81659e-05	0	0	0	0.000257175	0.000224648	0.000856238	0	0.00634048	0.000319209	0	0	0.002438	0.00315926	0.0122282	Allyl
CS76752	2	Castelfed-2-203	0.00185347	0	0	0	0	0.00240397	0	0	0	0	0	0	0.0016329	0.000418279	0.000526212	0.00011522	0.00688773	0.000675348	0	0	0.00177718	0.00233441	0.0116106	Allyl
CS76752	1	Castelfed-2-203	0.000972551	0	0	0	0	0.0014562	0	0	6.98853e-05	0	0	0	0.000926572	0.000154226	0	0.000148523	0.00519056	0.000405182	0	0	0.00192266	0.00361328	0.0144932	Allyl
CS76754	1	Castelfed-3-205	0.00119474	0	0	0	0	0.00154837	0	0	0	0	0	0	0.000208398	0.00010038	0	4.60031e-05	0.00242966	0.000201073	0	0	0.00293246	0	0.00697779	Allyl
CS76755	1	Castelfed-3-206	0.00180713	0	0	0	0	0.00289016	0	0	0	0	0	0	0.000501204	0.000267359	0	5.84034e-05	0.0031057	0.000294514	0.000144542	0	0.00412182	0	0.00898619	Allyl
CS76755	2	Castelfed-3-206	0.00319205	0.000930924	0	0.000136984	0	0.00557771	0	0	0	0	0	0	0.00264567	0.000144299	0	0	0.00272254	0.000302459	0	0	0.00525912	0	0.0110165	Allyl
CS76756	1	Castelfed-3-207	0.000712207	0	0	6.68201e-05	0.00075115	0	0	0	0	0	0	0	4.14869e-05	0.000218362	0	0.000527085	0.00434558	8.28289e-05	0	0	0.00135341	0.00149362	0.00611134	Allyl
CS76756	2	Castelfed-3-207	0.00169998	0	0	0.000205855	0	0.00184333	0	0	0	0	0	0	8.70509e-05	0.000244921	0	0	0.00453172	8.98403e-05	0	0	0.00232908	0	0.00805826	Allyl
CS76757	2	Castelfed-3-208	0.00370537	0.000161197	0	0	0	0.0052145	0	0	0	0	0	0	0.00225852	0.000331749	0.00104466	0.000128648	0.00365114	0.000353972	0	0	0.00538193	0	0.0133409	Allyl
CS76757	1	Castelfed-3-208	0.00191469	0	0	0	0	0.00258413	0	0	5.13653e-05	0	0	0	8.18904e-05	0.000161764	0	6.12433e-05	0.00396029	0.00036237	0	0	0.00408006	0	0.0102723	Allyl
CS76758	1	Castelfed-3-209	0.00353961	0	0.000154487	9.6702e-05	0	0.00316603	0	0	6.45588e-05	0	0	0	0.000223481	0.00035977	0	0.000132903	0.0044418	0.000278514	0	0	0.00653156	0	0.0151378	Allyl
CS76758	2	Castelfed-3-209	0.00455759	0.000171026	0.000208049	0.000139096	0	0.00546141	0	0	0	0	0	0	0.00263322	0.00017262	0	0	0.00300246	0.000408771	0	0	0.00672118	0	0.00850746	Allyl
CS76759	2	IP-Cat-0	0.00227974	0	0	0.000766149	0	0.003922	0	0.000298181	0	0	0	0	0.000854714	0.000462611	0.00152792	0.000361548	0.0087896	0.000358686	0	0	0.0040023	0	0.00828641	Allyl
CS76759	1	IP-Cat-0	0.000724256	0	0	0.000178951	0	0.00217997	0	0	0	0	0	0	0.000650014	0.000220198	0	0.000135038	0.00624505	0.000135918	0	0	0.00241779	0	0.00766074	Allyl
CS76760	2	CATS-6	0.000276753	0	0	0.00341019	0	0	0	0	0.000305443	0	0	3.21087e-05	0	0.000389682	0	0.000398379	0.00361313	0.000310912	0.000214666	0	0.00341238	0	0.00938449	OH-But
CS76760	1	CATS-6	0.000104735	0	0.00139779	0.00168522	0	0	0	0	0.000126647	0	0	0	0	0.000266588	9.42412e-05	0.000987454	0.00240582	0.000199648	0	0	0.00204887	0	0.00682693	OH-But
CS76760	2	CATS-6	0.00113916	0	0	0	0	0.00297447	0	0	6.48986e-05	0	0	0	0.000423702	0.000343832	0.000849617	0	0.00716228	0.00045047	0	0	0.00131846	0.00220951	0.00987309	OH-But
CS76762	1	IP-Cdo-0	0.000181807	0	0	0	0	0.000139048	0	0	5.7762e-05	0	0	0	0	0.000278048	0	0	0.00760221	0	0	0	0.000469654	0	0.0105436	Allyl
CS76763	2	IP-Cem-0	0.000224976	0	0	0	0	0.0003174	0	0.000892449	0	0	0	4.48578e-05	0.0024141	0.000353906	0	0.000620703	0.00533677	0.000261532	0.000118861	0	0.000488722	0	0.00597919	Allyl
CS76763	1	IP-Cem-0	0.000153239	0	0	0	0	0.000377856	0	0.000760268	0	0	0	4.73134e-05	0.00341762	0.000481393	0	0.000327574	0.00968706	0.000173436	0.000135036	0	0.0005696	0.00367752	0.0146947	Allyl
CS76764	2	IP-Cha-0	0.000793802	0	0	0.000104145	0	0.00066736	0	0	8.52444e-05	0	0	0	6.54607e-05	0.000193002	0	0	0.00547296	0.000524351	0	0	0.00209998	0	0.0111837	Allyl
CS76764	1	IP-Cha-0	0.000375114	0	0	7.92048e-05	0	0.00031303	0	0	6.74872e-05	0	0	0	5.04497e-05	0.000155509	0	0	0.00612377	0.000585713	0	0	0.00123335	0	0.0125906	Allyl
CS76768	1	IP-Cho-0	0.000566675	0	0	0	0	0.00116441	0	0	8.04551e-05	0	0	0	7.24444e-05	0.000534303	0	0.000109411	0.0109097	9.1413e-05	0	0	0.00134143	0.00489128	0.0210721	Allyl
CS76768	2	IP-Cho-0	0.00179213	0	0	0	0	0.002072	0	0	4.64087e-05	0	0	0	0.000177973	0.000292355	0	0	0.0046537	0.000191853	0	0	0.00388119	0	0.0136047	Allyl
CS76769	2	Choto-1	0.000835908	0	0	0.00169969	0	0.00162908	0	0.000361242	0	0	0	0	0	0.000274323	0	0	0.00558245	0.000172214	0	0	0.00306825	0	0.0127922	Allyl
CS76770	2	CIBC-17	0.000640054	0.000186756	0	0.000136275	0	0.00383224	0	0	0	0	0	0	0.00322427	0.000211368	0	0	0.00377842	0.000397051	0	0	0.000533808	0	0.00630274	Allyl
CS76770	1	CIBC-17	0.000291936	0.000347637	0	0	0	0.00279732	0	0	0	0	0	0	0.00258158	0.000156242	0	7.02318e-05	0.00535948	7.71166e-05	0	0	0.000289551	0.00098433	0.00778778	Allyl
CS76771	2	Cimin-1	8.55161e-05	0	0	0.00385421	0	0	0	0.000677491	0	0	0	0	0.00047052	0.000248871	0.000204153	0.00180151	0.00239815	0.000193654	0.000333188	0	0.00378556	0	0.00746706	OH-But
CS76771	1	Cimin-1	0.000112867	0	0.00256793	0.00237891	0	0	0	0.000865333	0	0	0	0	0.00089141	0.000343426	0.000190826	0.00345026	0.00308149	0.000283327	0.000394408	0	0.00395553	0	0.0104341	OH-But
CS76772	1	IP-Cir-0	0.000209312	0	0.000506376	0.000491378	0	0.000681518	0	0.000420126	0	0	0	5.18652e-05	0	0.000582396	0	0.00180647	0.00738635	0.000171784	0.000150914	0	0.000698474	0.00356807	0.00914357	OH-But
CS76772	2	IP-Cir-0	0.00046092	0	0.00110233	0.000879779	0	0.000860029	0	0.000775039	0	0	0	3.25751e-05	0	0.000625094	8.49266e-05	0.00359443	0.00580703	0.000124113	0.000279147	0	0.00103692	0	0.0096324	OH-But
CS76774	1	IP-Cmo-3	0.00164371	0	0	0	0	0.00201546	0	0	6.1457e-05	0	0	0	0.000294052	0.000218571	0	0.000131189	0.00941869	0.000245097	0	0	0.00146296	0.0017142	0.015948	Allyl
CS76774	2	IP-Cmo-3	0.00217612	0	0	0	0	0.00303082	0	0	9.96192e-05	0	0	0	0.000497243	0.000221237	0	0	0.00777764	0.000272334	0	0	0.00105846	0	0.0132616	Allyl
CS76775	2	IP-Coa-0	0	0	0	0.00703104	0	0	0	0.000336179	0.00023288	0	0	7.54996e-05	0	0.000566191	0.000253484	0.0012185	0.00469833	0.000592607	0.000307171	0	0.00380781	0	0.011424	OH-But
CS76776	1	IP-Coc-1	0.000102051	0	0.000593989	0.00135096	0	0	0	0.000402789	0.000203175	0	0	0	0	0.00086171	0	0.000486088	0.0134194	1.47544e-05	0	0	0.00263413	0	0.0141308	OH-But
CS76777	1	IP-Cod-0	0.000525136	0	0	0	0	0.00155258	0	0	0.000103129	0	0	0	0.000207197	0.000136941	0	0	0.00302044	0.000129442	0	0	0.00134568	0.00337125	0.0136482	Allyl
CS76780	2	IP-Con-0	0.000393718	0	0	0.00430778	0	0.00123012	0	0.00143695	0	0	0	2.78588e-05	6.10216e-05	0.000443365	8.53089e-05	0.00396079	0.00467399	0.00013602	0	0	0.00185765	0	0.00915276	OH-But
CS76780	1	IP-Con-0	0.00021389	0	0.000946559	0.00115516	0	0.000569308	0	0.000702176	0	0	0	3.51713e-05	0	0.000353718	0	0.00102321	0.00415973	0.000311557	0	0	0.000797602	0.0025596	0.0119942	OH-But
CS76782	1	IP-Cor-0	0.00126225	0	0.000156878	0.000179156	0	0.00343346	0	0	9.47647e-05	0	0	0	0.000170212	0.00013692	0	4.06303e-05	0.00419725	0	0	0	0.00271924	0.00337785	0.01194	Allyl
CS76784	1	IP-Cot-0	0.00138291	0	0	0	0	0.00239152	0	0	4.53293e-05	0	0	0	0.000351789	0.000127161	0	0	0.00713679	0	0	0	0.00282456	0	0.0137669	Allyl
CS76784	2	IP-Cot-0	0.00255131	0	0	0	0	0.00410388	0	0	4.86857e-05	0	0	0	0.000601104	0.000285044	0	0	0.00645871	0.000376929	0	0	0.00372265	0	0.0107436	Allyl
CS76785	1	IP-Coy-0	0.00024243	0.000105396	0	0	0	0.000683051	0	0	4.56438e-05	0	0	7.46366e-05	0.000142002	0.000783722	0	0	0.0253143	0.000235577	4.7909e-05	0	0.000512254	0	0.0125043	Allyl
CS76786	1	Ct-1	0.00536972	0	0	0	0	0	0	0	0	0	0	0	0.000636788	0.000129953	0	0.00106401	0.00329262	0.000277222	0	0	0.00515201	0	0.0100495	3OHP
CS76786	2	Ct-1	0.0047245	0	0	0	0	0	0	0	0	0	0	0	9.92511e-05	7.72905e-05	0	0	0.00172308	0.000191256	0	0	0.00634191	0	0.00840502	3OHP
CS76787	2	IP-Cum-1	0	0	0	0.00339082	0	0	0	0.000212738	6.61188e-05	0	0	4.37786e-05	9.3497e-05	0.000496953	0	0.00433317	0.00406622	0.000169997	0.000558949	0	0.00279217	0	0.00730404	OH-But
CS76790	2	CYR	0	0	0	0.00727849	0	0	0	0.000105859	0.000158722	0	0	3.34802e-05	0	0.000414917	0.000174443	0.00318895	0.00278888	0.000190751	0.000531956	0	0.00440873	0	0.00717326	OH-But
CS76790	1	CYR	0.000242579	0	0.00358503	0.00514762	0	0	5.40841e-05	0.000176484	0.000157345	0	0	0.000100054	0	0.000665523	0.000225099	0.00428601	0.0041828	0.000252217	0.000560005	0	0.00373287	0	0.00716043	OH-But
CS76791	2	Da-0	0.000218325	0	0.00159551	0	0.00016828	0	0	0	0	0	0	0	5.32039e-05	0.000195569	0	0.00602894	0.00245304	0.000331098	0.000590355	0	0.00345673	0	0.00427268	4MSO
CS76791	1	Da-0	0.000392275	0	0.0024155	0	0.000194966	0	0	0	0	5.46298e-05	0	0	0	0.000483953	0	0.00791895	0.00478893	0.000328207	0.00070393	0	0.00373763	0	0.00690734	4MSO
CS76792	1	IP-Dar-0	0.000632436	0	0	0	0	0.00164636	0	0	6.96677e-05	0	0	0	4.699e-05	0.000124287	0	0	0.0073442	0.000360473	0	0	0.000735111	0	0.0142568	Allyl
CS76793	1	IP-Deh-1	0.000170322	0	0.000405472	0.000893441	0	0	0	0	0.000215127	4.71982e-05	0	0	0	0.000403199	0	0.000641331	0.00680506	0.000240406	0	0	0.000890992	0.0028593	0.0126595	OH-But
CS76793	2	IP-Deh-1	0.0006451	0	0	0.00462574	0	0.00094973	0	0.000155853	0.000308686	0	0	4.48337e-05	8.0393e-05	0.00076562	0.000164317	0.00154729	0.00853111	0.000205115	0	0	0.000847036	0	0.00733481	OH-But
CS76796	1	DIR-9	0.000115406	0	0.00160972	0.00151748	0	0	0	0.000146955	7.46391e-05	0	0	8.67385e-05	0	0.000623504	0.000200464	0.00200607	0.003951	0.000329314	0.000400511	0	0.00360123	0	0.0105894	OH-But
CS76796	2	DIR-9	9.91552e-05	0	0	0.00194666	0	0	0	5.96894e-05	0.000166677	0	0	3.21846e-05	0	0.000403889	7.81949e-05	0.000949755	0.00286072	0.000231713	0.000258361	0	0.00219445	0	0.00413677	OH-But
CS76802	2	Dolen-1	0.000355562	0	0	0.00600115	0	0.000816812	0	0.000918417	6.73036e-05	0	0	4.41463e-05	0	0.000548234	0.00024952	0.000904591	0.00399754	0.000147542	0.000215527	0	0.00374103	0	0.00981094	OH-But
CS76803	2	Dolna-1-10	0.00166261	0	0	0.000211714	0	0.00479844	0	0	0	0	0	0	5.2524e-05	0.000133168	0	0	0.00359044	0.000107007	0	0	0.00323613	0	0.0113	Allyl
CS76803	1	Dolna-1-10	0.000869835	0	0	0	0	0.00444138	0	0	0	0	0	0	6.95777e-05	0.000110968	0	3.11612e-05	0.00460881	0.000268151	0	0	0.00312186	0	0.013045	Allyl
CS76804	2	Dolna-1-39	0.00315212	0.000430054	0	0.000430596	0	0.00921645	0	5.75226e-05	0	0	0	0	0.00194483	0.000263077	0	0	0.00424538	0.000327034	0	0	0.00219533	0	0.00604464	Allyl
CS76805	2	Dolna-1-40	0.000980622	0	0	0.000133429	0	0.00804066	0	0	0	0	0	0	7.45775e-05	0.000153131	0	0	0.00560366	0.000192879	0	0	0.00266653	0	0.011638	Allyl
CS76805	1	Dolna-1-40	0.000760891	0	0	0	0	0.00349205	0	0	4.00431e-05	0	0	0	5.76938e-05	0.000295905	0	2.97688e-05	0.0063112	0.000183084	0	0	0.000794751	0	0.0122501	Allyl
CS76807	2	Dospa-1	0.00203133	0	0	0.000235518	0	0.0023186	0	0	0	0	0	0	0.000543417	0.000140043	0	0	0.00360544	0.000151162	0	0	0.00232562	0	0.00559581	Allyl
CS76807	1	Dospa-1	0.0013282	0	0.000177568	0.000108943	0	0.00178661	0	0	0	0	0	0	0.000301477	0.000117545	0	0	0.00391401	0.000361664	0	0	0.00295498	0	0.0106329	Allyl
CS76809	1	Dra1-4	0.000702	0	0	0	0	0.000342469	0	0	0	0	0	0	5.96009e-05	8.9565e-05	0	0.000105637	0.0033859	0	0	0	0.0035585	0	0.0103815	Allyl
CS76811	1	Dra3-1	0.00136747	0.000185775	0	0	0	0	0	0	0	0	0	0	0.00286867	0.000270665	0	0.000142582	0.00397953	2.70465e-05	0	0	0.00221715	0.00324531	0.0103901	Allyl
CS76812	1	Draha2	0.00259383	0	0	0	0	0	0	0	0	0	0	0	3.65324e-05	0.000122795	0	0.0001226	0.00266779	0.000204326	0	0	0.00568816	0	0.0122233	3OHP
CS76812	2	Draha2	0.0024894	0	0	0	0	0	0	0	0	0	0	0	4.39888e-05	0.000138389	0	0	0.0025206	0.000239712	0	0	0.00534812	0	0.00866371	3OHP
CS76813	1	DraII-1	0.00376864	0	0	0	0	0	0	0	0	0	0	0	0.000289598	0.000236107	0	0.000189045	0.00406279	0.000279337	0	0	0.00278071	0.00219603	0.00703467	3OHP
CS76813	2	DraII-1	0.00404976	0	0	0	0	0	0	0	0	0	0	0	0.000551052	0.000166615	0	0	0.00226776	0.000231505	0	0	0.0031167	0	0.00532742	3OHP
CS76814	1	DraII-6	0.00216711	0	0	0	0	0	0	0	0	0	0	0	0.000265014	0.000141794	0	0.000146522	0.00257937	0.000170798	0	0	0.00330688	0	0.00902181	3OHP
CS76814	2	DraII-6	0.0045086	0	0	0	0	0	0	0	0	0	0	0	0.000412097	0.000228147	0	0	0.00356722	1.77594e-05	0	0	0.00373232	0	0.0122393	3OHP
CS76815	1	DraIII-1	0.00293519	0	0	0	0	0	0	0	0	0	0	0	0.000176561	0.000151139	0	0.000170626	0.0034658	0.000189818	0	0	0.00414181	0	0.0129675	3OHP
CS76815	2	DraIII-1	0.00212494	0	0	0	0	0	0	0	0	0	0	0	5.46618e-05	0.000128628	0	0	0.00252726	3.67036e-05	0	0	0.00365423	0	0.00890059	3OHP
CS76816	1	DraIV 1-11	0.000342723	0	0	0	0	0	0	0	0	0	0	0	0	0	0	0	0.000180188	0	0	0	0.000217612	0	0.000708763	3OHP
CS76816	2	DraIV 1-11	0.00262651	0	0	8.50704e-05	0	0	0	0	0	0	0	0	0.000173638	0.000170513	0	0	0.00315047	0.000199299	0	0	0.00474693	0	0.0135716	3OHP
CS76817	1	DraIV 1-8	0.00477059	0	0	0	0	0	0	0	0	0	0	0	0.000350269	0.000203159	0	0.000155444	0.00405294	0.000279212	0	0	0.00446376	0	0.0109319	3OHP
CS76817	2	DraIV 1-8	0.00468412	0	0	0	0	0	0	0	0	0	0	0	0.000127107	0.000243532	0	0	0.00365131	0.000106992	0	0	0.00520644	0	0.00786502	3OHP
CS76818	2	DraIV 2-9	0.00269869	0	0	0	0	0	0	0	0	0	0	0	4.98293e-05	0.000200653	0	0	0.00372231	0.000138438	0	0	0.00475688	0	0.00957802	3OHP
CS76818	1	DraIV 2-9	0.00256431	0	0	0	0	0	0	0	0	0	0	0	0.000183555	0.000143098	0	0.000130259	0.00268459	0	0	0	0.00390998	0	0.00830301	3OHP
CS76819	2	DraIV 3-7	0.00786266	0	0	0.000131802	0	0	0	0	0	0	0	0	0.000973796	0.000249483	0	0	0.00353431	0.000211528	0	0	0.00536221	0	0.00814686	3OHP
CS76819	1	DraIV 3-7	0.00605251	0	0	0	0	0	0	0	0	0	0	0	0.000877938	0.000166805	0	0.000233849	0.00285202	0.000240814	0	0	0.00458297	0	0.00949636	3OHP
CS76820	2	DraIV 5-12	0.0035664	0.000140938	0	0.000284306	0	0.000143031	0	0	0	0	0	0	0.00116634	0.000321865	0	0	0.00422779	0.000331242	0	0	0.00553617	0	0.00746268	3OHP
CS76820	1	DraIV 5-12	0.00226661	0.000284043	0	0	0	0	0	0	0	0	0	0	0.00125851	0.000327921	0	0.000134885	0.00533346	0.00038472	0	0	0.00527492	0	0.0103326	3OHP
CS76822	2	DraIV 6-13	0.00241647	0	0	0	0	0	0	0	0	0	0	0	0	0.000114705	0	0	0.0021786	1.82301e-05	0	0	0.00278831	0	0.00508023	3OHP
CS76822	1	DraIV 6-13	0.00372865	0	0	0	0	0	0	0	0	0	0	0	3.76179e-05	9.25766e-05	0	0	0.00220868	3.40664e-05	0	0	0.00250479	0	0.00531769	3OHP
CS76823	1	DraIV 6-22	0.000824427	0	0	0	0	0	0	0	0	0	0	0	0	9.13234e-05	0	9.74806e-05	0.00160378	0.000173847	0	0	0.00299608	0	0.00822174	3OHP
CS76823	2	DraIV 6-22	0.00220698	0	0	0	0	0	0	0	0	0	0	0	0.000128228	0.000163763	0	0	0.00224308	0.000249719	0	0	0.00478713	0	0.00875617	3OHP
CS76824	1	Duk	0.0077119	0	0	0	0	0	0	0	0	0	0	0	0.000498796	0.000202015	7.82072e-05	0.000212722	0.00423426	0.0003652	0	0	0.00532232	0	0.0123127	3OHP
CS76824	2	Duk	0.00769664	0	0	0	0	0	0	0	0	0	0	0	5.29746e-05	0.000155534	0	0	0.00274849	0.000364951	0	0	0.00623294	0	0.0097207	3OHP
CS76828	1	Eden-6	0.000614952	0	0	0	0	0.000819292	0	0	5.08874e-05	0	0	0	0	0.000131281	0	0	0.00542634	0.000290995	0	0	0.00207538	0	0.0130041	Allyl
CS76830	1	Eden-9	0.00113501	0	0	0	0	0.00170405	0	0	4.4785e-05	0	0	0	5.45901e-05	0.000135387	0	0	0.00645262	0.000336507	0	0	0.0034186	0	0.0116305	Allyl
CS76831	2	Edi-0	0.00108371	0	0	0.000154887	0	0.00192376	0	0	0	0	0	0	0.000825013	0.00019447	0	0	0.00433783	0.000506278	0	0	0.0023606	0	0.00906319	Allyl
CS76831	1	Edi-0	0.000766594	0	0	8.06759e-05	0	0.000979016	0	0	8.54302e-05	0	0	0	0.00059141	0.000188099	0	0.000121247	0.00630945	0.000316744	0	0	0.00135037	0	0.0155475	Allyl
CS76832	2	Edi-1	0	0	0	0.00246937	0	0	0	0	0.000154609	0	0	0.000211238	0	0.000610288	0	0.00013976	0.00644305	0.000150984	0.000128421	0	0.00175106	0	0.0100107	OH-But
CS76832	1	Edi-1	0	0	0.001614	0.00266063	0	0	0	0.000149017	0.00022653	0	0	0.000194231	0	0.000800679	0.000306466	0.00040785	0.00832967	0.000355637	0.000128108	0	0.00216736	0	0.0157392	OH-But
CS76835	1	Eds-9	0.00106229	0	0	0	0	0.00252624	0	0	6.23808e-05	0	0	0	7.0966e-05	0.000242341	0	3.14607e-05	0.00879523	0.000217517	0	0	0.00184741	0.00293554	0.013478	Allyl
CS76835	2	Eds-9	0.002429	0	0	0	0	0.00300754	0	0	6.14868e-05	0	0	0	6.13362e-05	0.000447714	0.000934319	0	0.00666342	0.000442081	0	0	0.000633065	0	0.00813063	Allyl
CS76836	1	IP-Ees-0	0.000524489	0	0	0	0	0.000155935	0	0	0	0	0	0	0.000190743	7.62189e-05	0	0	0.0044952	0.000388625	0	0	0.0012733	0.00225959	0.0144738	Allyl
CS76836	2	IP-Ees-0	0.00153032	0	0	0	0	0.00154848	0	0	6.582e-05	0	0	0	0.00018551	0.000158413	0	0	0.0049621	0.000438409	0	0	0.00256779	0	0.0099381	Allyl
CS76837	1	EkS 2	0.000745018	0	0	0	0	0.000944656	0	0	0	0	0	0	0.000457081	0.000369356	0	0	0.00893043	0.000266062	0	0	0.00106549	0	0.0155452	Allyl
CS76837	2	EkS 2	0.0014839	0	0	0	0	0.00215765	0	0	0	0	0	0	0.000729696	0.000235076	0	0	0.00503208	0.000539799	0	0	0.00347647	0	0.012317	Allyl
CS76838	1	IP-Elb-0	0.000140779	0	0.000306642	0.000453579	0	0.000226922	0	0.000191712	0	0	0	4.13566e-05	0	0.000237384	0	0	0.00458937	0	0	0	0.0010732	0	0.00703073	OH-But
CS76840	1	IP-Elp-0	0.000912533	0	0	0	0	0.000664186	0	0	5.30458e-05	0	0	0	0.000222479	0.000314096	0	5.52376e-05	0.0100109	0.000245573	0	0	0.00115017	0.00147259	0.0127939	Allyl
CS76840	2	IP-Elp-0	0.0014288	0	0	0	0	0.00143793	0	0	4.47932e-05	0	0	0	0.000153271	0.00019358	5.66703e-05	0	0.00679654	0.000263195	0	0	0.00232251	0	0.0113674	Allyl
CS76841	1	En-1	0.00812082	0	0	0	0	0	0	0	0	0	0	0	0.00116712	0.000179101	0	0.00141057	0.00456318	0.000383735	0	0	0.00550418	0	0.0119999	3OHP
CS76841	2	En-1	0.00453905	0	0	0	0	0	0	0	0	0	0	0	5.75979e-05	6.28072e-05	0	0	0.001805	0.000244631	0	0	0.00605196	0	0.0082662	3OHP
CS76844	2	Epidauros-1	0	0	0.00103583	0.0015331	0	0	0	9.54614e-05	0	0	0	0	0.000400929	0.000366507	0	0.0103204	0.00636637	4.78685e-05	0.000336642	0	0.00110178	0	0.00804472	OH-But
CS76844	1	Epidauros-1	0	0	0.000889004	0.00111461	0	0	0	0.000119256	0	0	0	2.6267e-05	0.000506742	0.00049882	0	0.00777242	0.00891862	0	0.00028957	0	0.000972232	0.00312001	0.0120482	OH-But
CS76845	2	Erg2-6	0.00141703	0	0	0	0	0.00110044	0	0	0	0	0	0	7.59847e-05	0.000144102	0	0	0.0028497	0.0001316	0	0	0.00338394	0	0.0104997	Allyl
CS76845	1	Erg2-6	0.00197006	0	0	0	0	0.00176032	0	0	0	0	0	0	0.00105856	0.000136881	0	0	0.00340131	0.000163266	0	0	0.0053206	0	0.0122289	Allyl
CS76846	1	IP-Esn-2	0.000566152	0	0	0	0	0.00310979	0	0	9.95744e-05	0	0	0	7.66229e-05	0.000127091	0	0	0.00739399	0.000546153	0	0	0.000903328	0.00249826	0.0157513	Allyl
CS76846	2	IP-Esn-2	0.00155423	0	0	0.000109023	0	0.00480334	0	0	0.00012168	0	0	0	7.92701e-05	0.000478733	0.00072557	0	0.00898406	0.000578143	0	0	0.000963248	0	0.0127178	Allyl
CS76847	2	ESP-1-11	0.000230309	0	0.000157397	0.00733109	0	0	0	0	0.000457261	0	0	5.6087e-05	0	0.000675804	0.000124664	0.00237548	0.00413535	0.000207623	0.000527019	0	0.00482736	0	0.0101794	OH-But
CS76847	1	ESP-1-11	0.000170382	0	0.00315704	0.00506088	0	0	0	8.57051e-05	0.000238808	0	0	0.000116256	0	0.000755515	0.00026045	0.00511673	0.00412772	0.000330064	0.00072852	0	0.00355397	0	0.00874742	OH-But
CS76848	1	IP-Evs-0	0.000464348	0	0	0	0.00085556	0	0	0	0	0	0	0	8.35886e-05	0.000152905	0	0	0.0091031	0.000332528	0	0	0.00086352	0.00264435	0.0189301	Allyl
CS76848	2	IP-Evs-0	0.00128234	0	0	6.92156e-05	0	0.00172797	0	0	0	0	0	0	0.000296325	0.000148385	0	0	0.00633402	0.000149361	0	0	0.00234705	0	0.012654	Allyl
CS76850	1	F??b-2	0.000774032	0	0	0	0	0.00175306	0	0	0.00012202	0	2.13077e-05	0	0.000181031	0.000467924	0	0	0.0179499	0.000271011	0	0	0.000959479	0	0.014115	Allyl
CS76851	1	F??b-4	0.000583877	0	0	0	0	0.00394341	0	0.000127862	0	0	1.38422e-05	3.72676e-05	0	0.000332047	0	0	0.0130833	0.000762043	0	0	0.00183829	0.00351146	0.0143687	Allyl
CS76853	1	Faneronemi-3	0.00037472	0	0.000330425	0.000277001	0	0.000978457	0	0.000101745	0	0	0	0	0.000292086	0.000287556	0	0.00509545	0.00388513	0.000181653	0.000309574	0	0.00141438	0.00366442	0.0102365	OH-But
CS76853	2	Faneronemi-3	0	0	0	0.00135923	0	0	0	0.000184982	0	0	0	0	0.000313476	0.000235361	0	0.00620581	0.00246127	0.000178458	0.000251823	0	0.00195304	0	0.00667413	OH-But
CS76854	2	IP-Fel-2	0	0	0	0.00533099	0	0	0	0.000630141	0.000134416	0	0	3.85781e-05	0	0.000416907	0.000471898	0.00252814	0.00320327	0.000277517	0.000523461	0	0.00418567	0	0.0135538	OH-But
CS76854	1	IP-Fel-2	0	0	0.00237999	0.00245717	0	0	0	0.000497993	8.67069e-05	0	0	6.79933e-05	0	0.000437901	0.000263378	0.00253197	0.00323112	0.000285654	0.000422783	0	0.00285282	0	0.00846962	OH-But
CS76856	1	Fell2-4	0.00566692	0	0	0	0	0	0	0	0	0	0	0	0.00123521	0.000152881	0	9.41436e-05	0.00452926	0	0	0	0.00431813	0	0.0115707	3OHP
CS76856	2	Fell2-4	0.00266965	0	0	0	0	0	0	0	0	0	0	0	8.58621e-05	0.000139665	0	0	0.0030772	3.11398e-05	0	0	0.00444045	0	0.015514	3OHP
CS76857	1	Fell3-7	0.00592061	0	0	0	0	0	0	0	0	0	0	0	0.00128287	0.000189089	0	0.000131492	0.00453229	0.000139415	0	0	0.00521131	0	0.0107406	3OHP
CS76857	2	Fell3-7	0.00438175	0	0	0	0	0	0	0	0	0	0	0	0.000538467	0.000160062	0	0	0.00347551	6.89622e-05	0	0	0.00766788	0	0.0114488	3OHP
CS76858	2	Filet-1	0	0	0	0.00686504	0	0	0	0	0.000258887	0	0	0	0	0.000413354	7.16938e-05	0.00128885	0.00327724	0.000378834	0.00023122	0	0.00363524	0	0.00967455	OH-But
CS76860	1	Fj??1-2	0.000543348	0	0	0	0	0.000198801	0	0	9.47e-05	0	0	8.60787e-05	0	0.000614882	0	0	0.0120197	0.000429955	0	0	0.000663892	0.00301539	0.0136506	Allyl
CS76862	2	Fj??2-4	0.00140027	0	0	0	0	0.0023972	0	0	0	0	0	0	0.000174814	0.000658125	0.000746256	0	0.00638898	0.000379577	0	0	0.000586271	0	0.00519071	Allyl
CS76862	1	Fj??2-4	0.000949876	0	0	0	0	0.00118621	0	0	0	0	0	0	0.000186695	0.000423228	0	8.93701e-05	0.00599008	0.000518306	0	0	0.00220279	0.00411763	0.0127498	Allyl
CS76863	2	Fly2-1	0.000235308	0	0.00182062	0	0.000411451	0	5.49542e-05	0	0	0	0	3.88554e-05	5.27765e-05	0.00042066	0	0.0067493	0.00450102	0.000590904	0.000468773	0	0.00247432	0	0.0061476	4MSO
CS76863	1	Fly2-1	0.000115318	0	0.000888575	0	0.00021767	0	0	0	0	0	0	8.03123e-05	6.18949e-05	0.000614644	0	0.00435363	0.0058006	0.00035404	0.000331845	0	0.00225905	0	0.00766734	4MSO
CS76865	1	FlyA 3	8.19409e-05	0	0.0005561	0	7.9072e-05	0	0	0	0	0	0	7.20864e-05	5.46158e-05	0.000600615	0	0.00187287	0.00536662	0.000248825	0.000338403	0	0.00109895	0	0.00884589	Butenyl
CS76867	1	FOR-23	0	0	0	0	0	0	0	0	0	0	0	0	0	0	0	3.4728e-05	4.84692e-05	0	0	0	8.11916e-05	0	0.00016741	OH-But
CS76867	2	FOR-23	0.00020864	0	0	0.00614744	0	0	0	0.000171662	0.000252436	0	0	6.41711e-05	0.000151195	0.000580139	0.000242805	0.00178544	0.00357298	0.000299771	0.000537746	0	0.00368002	0	0.00728028	OH-But
CS76868	1	Fri 1	0.00103978	0	0	0	0	0.00262915	0	0	0	0	0	0	0.000360303	0.000250197	0	0	0.00762053	0.000901131	0.000306605	0	0.00229502	0.00339351	0.0124112	Allyl
CS76868	2	Fri 1	0.00142563	0	0	0	0	0.00474079	0	0	0	0	0	0	0.000722687	0.000297082	0.000799633	0	0.00798784	0.000678171	0	0	0.00118919	0	0.00733361	Allyl
CS76869	1	Fri 2	0.000540389	0	0	0	0	0.00156453	0	0	8.90852e-05	0	0	0	0.000210297	0.000533228	0	0	0.0103623	0.00090283	0	0	0.00057801	0	0.00810722	Allyl
CS76870	1	Fri 3	0.00122418	0	0	0	0	0.00338851	0	0	7.08407e-05	0	0	0	0.000291848	0.000472364	0	0	0.00778929	0.000726575	0	0	0.00292672	0.00383649	0.0108396	Allyl
CS76870	2	Fri 3	0.00199877	0	0	0	0	0.00573136	0	0	0	0	0	0	0.000165658	0.000325812	0.000814784	0	0.00512512	0.000725744	0	0	0.00297779	0	0.00615016	Allyl
CS76871	2	IP-Fue-2	0	0	0	0.00459139	0	0	0	0.0003741	0	0	0	0	0	0.000362059	0	0	0.00408136	0.000422959	0.000186855	0	0.00332793	0	0.0130118	OH-But
CS76871	1	IP-Fue-2	0	0	0.0014043	0.00195825	0	0	0	0.000333982	7.33202e-05	3.50562e-05	0	0	0	0.000433984	0.000152802	0.000722288	0.00685273	0.000397093	0.000197214	0	0.00249232	0	0.0160912	OH-But
CS76873	2	Furni-1	0.00159844	0	0	0.000211198	0	0.00281591	0	0	0	0	0	0	0.000269016	0.000235675	0	0	0.00439198	0.000256228	0	0	0.00269743	0	0.00625713	Allyl
CS76873	1	Furni-1	0.00136086	0	0.000107466	0	0	0.00198283	0	0	0	0	0	0	0.00041167	0.000273621	0	0	0.0045451	0.00041369	0	0	0.00356812	0	0.00941106	Allyl
CS76875	2	Ge-0	0.000331933	0	0.00369051	0	0.000493434	0	0	0	0	0	0	6.21117e-05	0	0.000429946	0	0.00649343	0.00263084	0.000579377	0.0007643	0	0.00360683	0	0.00322223	4MSO
CS76875	1	Ge-0	0	0	0.000214703	0.000481814	0	0	0	0	7.69158e-05	0	0	0	0	0.000708414	0	0.000418492	0.00738236	0.000148761	6.69723e-05	0	0.00158917	0	0.012484	4MSO
CS76876	2	Geg-14	0.00146996	0	0	0	0	0.00468289	0	9.09991e-05	0	0	0	0	0.000628638	0.000115609	0	0	0.00257987	0.000580525	0	0	0.00386583	0	0.00799445	Allyl
CS76877	2	GEN-8	0.00131961	0	0	0	0	0.000831273	0	0	0	0	0	0	0.000211162	0.00017858	0	0	0.00336677	7.18427e-05	0	0	0.00357233	0	0.0102317	Allyl
CS76877	1	GEN-8	0.00184425	0.000104836	0	0	0	0.00193722	0	0	0	0	0	0	0.00123243	0.000186779	0	8.59044e-05	0.00487604	0.000166655	0	0	0.00471241	0	0.0124787	Allyl
CS76878	2	Giffo-1	0	0	0	0.00565859	0	0	0	0	0	0	0	0	0	0.00023423	0	0.00265066	0.0024807	0.000146804	0.00017688	0	0.00267124	0	0.00874584	OH-But
CS76878	1	Giffo-1	0	0	0.00282203	0.00386931	0	0	0	0.000127128	0.000109978	0	3.23104e-05	0	0	0.000428169	6.05034e-05	0.0031434	0.00462952	0.000215801	0	0	0.00356677	0	0.0150438	OH-But
CS76879	2	IP-Glo-1	0.000375915	0	0	0.00659205	0	0	0	0.00025569	0.000457007	0	0	0.000205407	0	0.00126325	0	0.000816971	0.00813669	0.000465391	0	0	0.00294074	0	0.00734522	OH-But
CS76879	1	IP-Glo-1	0.000167399	0	0.00116664	0.00427384	0	0	0	0.000257339	0.000436732	0	0	0.000332912	0	0.00259034	0	0.000711623	0.0195482	0.000508064	0	8.64165e-06	0.00209723	0	0.0170502	OH-But
CS76880	1	Gn-1	0.00210574	0.000373564	0	0	0	0.00414991	0	0	0	0	0	0	0.00227648	0.000254995	0	0	0.00439813	0.000360957	0	0	0.00412628	0	0.0104162	Allyl
CS76880	2	Gn-1	0.00169051	7.92362e-05	0	0	0	0.00450563	0	0	0	0	0	0	0.000761049	0.000150257	0	0	0.00303637	0.000243056	0	0	0.00387197	0	0.00910211	Allyl
CS76881	1	Gn2-3	0.00146572	0	8.47761e-05	0	0	0.00168153	0	0	0	0	0	0	0.000323979	0.000142055	0	0	0.00302875	0.000293932	0	0	0.00307983	0	0.00902966	Allyl
CS76881	2	Gn2-3	0.00117377	0	0	0	0	0.000836713	0	0	0	0	0	0	9.20981e-05	8.29185e-05	0	0	0.00177187	0.000290601	0	0	0.00227817	0	0.00767756	Allyl
CS76882	1	Goced-1	0	0	0.00101555	0.00123933	0	0	0	0.000110201	0	0	0	0	0	0.000265611	0	0.000844117	0.00254835	0.000274737	0.000109101	0	0.00198892	0	0.00589989	OH-But
CS76882	2	Goced-1	0.000202659	0	0	0.0066515	0	0	0	0.000234238	0	0	0	3.09862e-05	0	0.000408138	7.468e-05	0.002138	0.00334096	0.00042617	0.000197517	0	0.0026325	0	0.00742779	OH-But
CS76883	2	Gol-2	0	0	0	0.00319361	0	0	0	0	0.000608816	0	0	0.000182927	0	0.00059449	0.000102779	0.000380307	0.0051175	0.000402657	7.77364e-05	0	0.00148741	0	0.00808878	OH-But
CS76884	2	Got-22	0.000578863	0	0	0	0	0.00146407	0	0	0	0	0	0	5.30503e-05	0.000199288	0	0	0.00383746	0.000418335	0	0	0.000951842	0	0.00617482	Allyl
CS76884	1	Got-22	0.000383064	0	0	0	0	0.00078202	0	0	0.00010292	0	0	0	8.79402e-05	0.000354798	0	5.08669e-05	0.00664702	0.000331643	0	0	0.0010727	0.00250337	0.0111789	Allyl
CS76885	2	Gr-5	0.00270519	0	0	0	0	0	0	0	0	0	0	0	0.000473245	0.000113546	0	0.000940377	0.00306346	0.000214278	0	0	0.00354101	0	0.00853584	3OHP
CS76885	1	Gr-5	0.00268763	0	0	0	0	0	0	0	0	0	0	0	0.00163556	0.000183262	0	0.000159264	0.00547724	0.000113612	0	0	0.00369182	0	0.0118976	3OHP
CS76886	1	IP-Gra-0	0.000149361	0	0.00196929	0.000591993	0.000709528	0	0	0.00271979	0.000206963	0	0	0	0	0.000369062	0	0.00212717	0.00735862	0.00058899	0	0	0.00208108	0	0.0115231	OH-But
CS76886	2	IP-Gra-0	0.000212479	0	0	0.002501	0	0.000965848	0	0.00435349	9.1229e-05	0	0	0	0	0.000467149	0	0.00274986	0.005737	0.000419745	0	0	0.00117889	0	0.00792446	OH-But
CS76887	2	Gradi-1	0.00192388	0	0	0.000227216	0	0.00367973	0	0	0	0	0	0	0.000127693	0.000160154	0	0	0.00255913	0.000240775	0	0	0.00303897	0	0.0095201	Allyl
CS76887	1	Gradi-1	0.00145586	0	0.000137074	9.1395e-05	0	0.00144397	0	0	0	0	0	0	0.000122412	0.000219475	0	0	0.00306838	0.000242198	0	0	0.00346078	0	0.0118377	Allyl
CS76887	2	Gradi-1	0.00339464	0	0	0.000215657	0	0.00303688	0	0	0	0	0	0	0.0002152	0.00022896	0	0	0.00337981	0.000316107	0	0	0.00443494	0	0.0124071	Allyl
CS76888	2	Grivo-1	0.000679101	0	0	0.00208779	0	0.0011834	0	0.00171825	0.000144767	0	0	6.89739e-05	4.77927e-05	0.000635646	0	0.00131099	0.0079601	0	0	0	0.00112357	0.0049375	0.0110232	OH-But
CS76888	1	Grivo-1	0.000322448	0	0.000713782	0.00125926	0	0.000451153	0	0.000292585	0.000316066	0	0	5.13182e-05	6.91209e-05	0.000551782	0	0.00186572	0.00881144	9.10869e-05	0	0	0.000834617	0	0.0215709	OH-But
CS76890	1	Groch-1	0.000368233	0	0.000864299	0.00214443	0	0.00135899	0	0.00017789	0	0	0	0	0.00155157	0.000201995	0	0.000978153	0.00415109	0.000229584	0	0	0.00346477	0	0.0106249	OH-But
CS76891	1	Gr??n 12	0.000938681	0	0	0	0	0.000836385	0	0	8.97499e-05	0	0	0	7.78114e-05	0.000599757	0	0	0.0110436	0.000603434	0	0	0.00236007	0.00380369	0.0135976	Allyl
CS76894	2	IP-Gua-1	0.00147356	0	0	0	0	0.00172486	0	0	6.87909e-05	0	0	7.18968e-05	0.000298774	0.000636674	0.000422697	9.14468e-05	0.0109071	0.0005762	0	0	0.000931061	0	0.00842857	OH-But
CS76894	2	IP-Gua-1	0	0	0	0.00733661	0	0	0	0.0021625	0.00033833	0	0	0	0	0.000529371	0.000433838	0.0012792	0.00504131	0.000190507	0.000338233	0	0.00516786	0	0.0117063	OH-But
CS76894	1	IP-Gua-1	0	0	0.00188855	0	0	0	0	0.000809344	0.000131966	4.12649e-05	0	0	0	0.000549098	0.000274132	0.000820869	0.00585019	0.000272439	0.000257067	0	0.00198354	0.00636541	0.0168684	OH-But
CS76896	1	Gul1-2	0.000507582	0	0	0	0.000565647	0	0	0	0	0	0	0	0	0.000278933	0	0	0.00537642	0.000140502	0	0	0.0013286	0	0.0131012	Allyl
CS76896	2	Gul1-2	0.00149605	0	0	0	0	0.00169091	0	0	0	0	0	0	8.52356e-05	0.000266262	0.000791617	0	0.00609484	0.000227246	0	0	0.0012595	0	0.00892795	Allyl
CS76897	2	H55	0.000787171	0	0.00240744	0	0.00104074	0	9.52639e-05	0	0	0	0	0.00011834	0	0.000673598	0	0.00626075	0.0032043	0.000563549	0.000497957	0	0.00261436	0	0.00470563	4MSO
CS76897	1	H55	0.000244176	0	0.00182599	0	0.00115788	0	0.000181781	0	0	0	0	0.000162949	0	0.000983019	0	0.00845813	0.00550722	0.000669031	0.000944266	0	0.00352559	0	0.00813071	4MSO
CS76898	2	Ha-HBT1-2	0.00187791	0	0	0	0	0.00210063	0	0	0	0	0	0	0.000502402	0.000130246	0	0	0.00251544	0.000392105	0	0	0.0044025	0	0.0103219	Allyl
CS76898	1	Ha-HBT1-2	0.00216716	0.00025981	0	0	0	0.00196679	0	0	0	0	0	0	0.0028944	0.000196007	0	0	0.00323271	0.000284558	0	0	0.0045943	0	0.0111422	Allyl
CS76899	2	Ha-HBT2-10	0.00108908	0	0	0	0	0.000226761	0	0	0	0	0	0	0	0.000181334	0	0	0.00365742	0.000294959	0	0	0.00235115	0	0.00914553	3OHP
CS76899	1	Ha-HBT2-10	0.00133713	0	0	0	0	0.000429642	0	0	3.84431e-05	0	0	0	0.000167593	0.000132159	0	7.41343e-05	0.00559715	0.000178285	0	0	0.00396782	0	0.0135205	3OHP
CS76900	1	Ha-HBT3-11	0.00133176	0	0	0	0	0.00161204	0	0	0.0002209	0	0	0	0.000939949	0.000236184	0	0.000847331	0.00618824	0.000105176	0	0	0.00188886	0.00305309	0.0136898	Allyl
CS76900	2	Ha-HBT3-11	0.00112315	0	0	0	0	0.000833895	0	0	0	0	0	7.38511e-05	5.54924e-05	0.000193767	0	0	0.0037632	8.4862e-05	0	0	0.00186511	0	0.00771177	Allyl
CS76901	2	Ha-P-13	0.00159425	0	0	0	0	0.00131736	0	0	4.90683e-05	0	0	0	0.000135139	0.000190199	0	0	0.00296635	0.000229843	0	0	0.00373826	0	0.00803771	Allyl
CS76901	1	Ha-P-13	0.00207083	9.47207e-05	0	0	0	0.00179193	0	0	0	0	0	0	0.00196657	0.000221876	0	0.00119669	0.00427823	0.000221831	0	0	0.00403	0	0.00899535	Allyl
CS76902	2	Ha-P2-1	0.00177988	0	9.23993e-05	0	0	0.00170577	0	0	5.59724e-05	0	0	0	0.000430047	0.000170645	0	0	0.00274822	0.00012134	0	0	0.00423451	0	0.0103287	Allyl
CS76902	1	Ha-P2-1	0.00323926	0.000458743	0	0	0	0.00323725	0	0	0	0	0	0	0.00254407	0.000211557	0	0.00121486	0.00374752	0.000315821	0	0	0.00372211	0	0.00917829	Allyl
CS76903	1	Ha-S-B	0.00183666	0.00034661	0	0	0	0.001789	0	0	0	0	0	0	0.00122703	0.000366491	0	0	0.00662784	0.000346341	0	0	0.00501352	0	0.0129926	Allyl
CS76903	2	Ha-S-B	0.00123925	0	0	0	0	0.00103079	0	0	5.78678e-05	0	0	0	6.51908e-05	0.000178508	0	0	0.00405627	0.000312932	0	0	0.00215788	0	0.00663894	Allyl
CS76904	1	Ha-SP-2	0.0102495	9.52643e-05	0	0	0	0	0	0	0	0	0	0	0.00219975	0.000184407	0	0.00147613	0.00311653	0.000263841	0	0	0.00398493	0	0.00839472	3OHP
CS76904	2	Ha-SP-2	0.0082002	0	0	0	0	0	0	0	0	0	0	0	0.000329109	0.000112274	0	0	0.00186113	0.000218941	0	0	0.0055615	0	0.00845753	3OHP
CS76905	2	Hadd-2	0.00389447	0.000178626	0	0	0	0	0	0	0	0	0	0	0.00415221	0.000146986	0	0	0.00248875	0.00030846	0	0	0.00577264	0	0.0139959	3MSO
CS76905	1	Hadd-2	0.00178747	0	0	0	0	0	0	0	0	0	0	0	0.00158876	7.18418e-05	0	0.000115845	0.00155761	0	0	0	0.00384593	0	0.00758962	3MSO
CS76906	1	Hadd-3	0.00101574	0	0	0	0	0	0	0	0	0	0	0	0.000104383	0	0	7.05614e-05	0.000976416	7.22187e-05	0	0	0.00196265	0	0.00381694	3OHP
CS76906	2	Hadd-3	0.00403964	0	0	0	0	0	0	0	0	0	0	0	0.000103517	4.6614e-05	0	0	0.00127155	0.000527773	0	0	0.00487035	0	0.0068571	3OHP
CS76907	1	Hag-2	0.000862887	0	0	0	0	0.000556417	0	0	0.000114841	0	1.20603e-05	0	8.96424e-05	0.000533507	0	2.72461e-05	0.0132198	0	0	0	0.000984602	0.00320315	0.0148597	Allyl
CS76909	1	Halca-1	0.00103349	0	0	0	0	0.00263079	0	0	0	0	0	0	0.000151803	0.00015743	0	0	0.00374661	0.000442465	0.000130383	0	0.0029153	0	0.00999729	Allyl
CS76909	2	Halca-1	0.00495576	0	0	0	0	0.00540915	0	0	0	0	0	0	0.000559056	0.000217351	0.0012928	0	0.00325625	0.000509953	0	0	0.00409523	0	0.00547632	Allyl
CS76910	1	Hamm-1	0.000391926	0	0	0	0	0.000275831	0	0	0	0	0	0	4.22172e-05	0.00031226	0	3.26747e-05	0.00843439	0	0	0	0.0010571	0.00320437	0.0120898	Allyl
CS76913	1	Hart-2	0.00186409	9.42513e-05	0	0	0	0.00127515	0	0	0	0	0	0	0.000927764	0.000180967	0	0	0.00480831	8.34927e-05	0	0	0.00327389	0	0.00951125	Allyl
CS76913	2	Hart-2	0.00126308	0	0	0	0	0.00107266	0	0	0	0	0	0	0.000175446	0.000118181	0	0	0.00318756	0.000108913	0	0	0.00267021	0	0.00883675	Allyl
CS76914	2	Haes-1	0.00184752	0	0.000107666	0	0	0.00186343	0	0	0	0	0	0	0.000289665	0.00020888	0	0	0.00310819	3.81562e-05	0	0	0.00282313	0	0.00829211	Allyl
CS76914	1	Haes-1	0.00257389	0.0003655	8.6158e-05	0	0	0.00214866	0	0	0	0	0	0	0.00177054	0.000154343	0	0	0.00445407	0	0	0	0.00392859	0	0.00953349	Allyl
CS76915	1	Hau-0	0.00102247	0	0	0	0	0.000917394	0	0	0.000117816	0	0	0	4.2975e-05	0.000439809	0	0	0.0170287	0.000480409	0	0	0.00116725	0.00233291	0.011186	Allyl
CS76915	2	Hau-0	0.00116759	0	0	7.75531e-05	0	0.00409662	0	0.000149841	0.000111478	0	0	2.6617e-05	0.000115839	0.000910595	6.75783e-05	0	0.0240385	0.000705328	0	0	0.00188994	0	0.00962785	Allyl
CS76916	1	HE-1	0.00372802	0	0	0	0	0	0	0	0	0	0	0	0.000445044	0.000108982	0	0.000159233	0.00252077	0.000215603	0	0	0.00511772	0	0.0112344	3OHP
CS76916	2	HE-1	0.00266488	0	0	0	0	0	0	0	0	0	0	0	5.91671e-05	8.93558e-05	0	0	0.00172841	3.90401e-05	0	0	0.00519545	0	0.00889893	3OHP
CS76917	1	IP-Hec-0	0.000159119	0	0.000654121	0.00148315	0	0	0	0.000130402	6.35267e-05	0	0	0	0	0.00015042	0	0.000504607	0.00370353	0.000337373	0	0	0.0020801	0	0.0124478	OH-But
CS76917	2	IP-Hec-0	0.000302553	0	0	0.00479623	0	0.000335292	0	0.000235008	0.000290326	0	0	0	0	0.000374749	8.68723e-05	0.000759193	0.00512292	0.000180252	0	0	0.00281773	0	0.0136361	OH-But
CS76918	2	Hel-3	0.00117526	0	0	0	0	0.00172519	0	0	0	0	0	0	0.000463475	0.000471852	0	0	0.0108112	0.000382607	0	0	0.00164104	0	0.0134807	Allyl
CS76918	1	Hel-3	0.00044594	0	0	0	0	0.000861347	0	0	0	0	0	0	0.000104797	9.60933e-05	0	0	0.00442834	0.000111145	0	0	0.000431121	0	0.00743349	Allyl
CS76920	2	IP-Her-12	0.000226395	0	0	0.00099461	0	0.00178637	0	0.000938908	0	0	0	5.17018e-05	0	0.000551421	0	0.000969949	0.00870897	0.000266778	0.000186605	0	0.000847231	0	0.00667466	OH-But
CS76920	1	IP-Her-12	0.00014	0	0.000401846	0.000527548	0	0.00139219	0	0.000630669	5.32292e-05	0	0	0	0	0	0	0.000521247	0.0124029	0.000320084	0.000169074	0	0.000659911	0.0030002	0.00995838	OH-But
CS76924	1	Hod	0.00108733	0	0	0	0	0.00127954	0	0	0	0	0	0	0.000372147	0.000162444	0	3.5193e-05	0.00356362	0.00014437	0	0	0.00138319	0.00119847	0.00482243	Allyl
CS76924	2	Hod	0.00174567	0	0	0	0	0.00224307	0	0	0	0	0	0	0.000405984	0.00011715	0	0	0.00314377	0.000195859	0	0	0.00409268	0	0.013373	Allyl
CS76925	2	Hof-1	0.00205194	0	0.000144736	0	0	0.00135309	0	0	0	0	0	0	0.000668466	0.000181559	0	0	0.00298695	0.000185583	0	0	0.00324977	0	0.00720375	Allyl
CS76925	1	Hof-1	0.00211919	0.000301625	0	0	0	0.00170559	0	0	0	0	0	0	0.00182512	0.000223872	0	0.000622019	0.00420195	0.000263671	0	0	0.00349611	0	0.00794638	Allyl
CS76926	1	HolA-1 1	0.000560908	0	0	0	0	0.00186371	0	0	5.35032e-05	0	0	0	0	0.000139838	0	0	0.0039291	0.000237075	0	0	0.00203502	0	0.00951462	Allyl
CS76926	2	HolA-1 1	0.00251461	0	0	0	0	0.00769379	0	9.14632e-05	6.05615e-05	0	0	0	7.5948e-05	0.000568639	0.00108237	0	0.00462647	0.000294005	0	0	0.000787411	0	0.00563564	Allyl
CS76927	1	HolA-1 2	0.000288194	0	0	0	0	0.00207248	0	0	0	0	0	0	0.000858065	0.000136698	0	0	0.00321243	0.000153714	0	0	0.000942136	0.0018739	0.00793154	Allyl
CS76928	2	HolA-2 2	0.000726259	0	0	0	0	0.00280764	0	0	6.98238e-05	0	0	0	0.00122112	0.000256214	0	0	0.00449146	0.00014394	0	0	0.00167969	0	0.00823646	Allyl
CS76928	1	HolA-2 2	0.000587727	0	0	0	0	0.00218654	0	0	5.56453e-05	0	0	0	0.00097348	0.000213817	0	0	0.00621871	0.000180662	0	0	0.000985922	0	0.0112497	Allyl
CS76930	2	IP-Hor-0	0.00149874	0	0	0.000113583	0	0.00202128	0	0	0.000125697	0	0	0	5.2161e-05	0.000271329	0	0	0.0063903	8.28344e-05	0	0	0.00177965	0	0.00996229	Allyl
CS76930	1	IP-Hor-0	0.000950006	0	0	0	0	0.00138536	0	0	9.86332e-05	0	0	0	0	0.000272126	0	0	0.00678767	6.89559e-05	0	0	0.00101919	0.0023889	0.0177169	Allyl
CS76931	1	Hov1-10	0.000183776	0	0.000151847	0	0.000236942	0	0	0	0	0	0	3.51253e-05	7.61046e-05	0.000422553	0	0.00653848	0.00495369	0.000210908	0.000357991	0	0.000603747	0.0040113	0.0114108	4MSO
CS76931	2	Hov1-10	0.000436622	0	0.00017293	0	0.00043236	0	0	0	0.000164253	0	0	3.92901e-05	0.000106966	0.000687628	0	0.00742739	0.00751665	0.000242136	0.000458165	0	0.00188498	0	0.00965125	4MSO
CS76932	1	Hov1-7	0.000885103	0	0	7.59682e-05	0	0.000939789	0	0	0	0	0	0	9.90286e-05	0.000330656	0	0	0.00962796	0.000235285	0	0	0.00122484	0	0.0131901	Allyl
CS76932	2	Hov1-7	0.00159455	0	0	6.88305e-05	0	0.00216754	0	0	0	0	0	0	0.000216341	0.000287438	0	0	0.00846676	0.000274939	0	0	0.0028003	0	0.0153342	Allyl
CS76936	1	Hov4-1	0.00021632	0	0	5.64142e-05	0	0.000433007	0	0	0	0	0	0	0	0.000155244	0	3.54386e-05	0.00397862	0.000336708	0	0	0.00108106	0.00273378	0.013809	Allyl
CS76937	1	Hovdala-2	0.000495626	0	0.000982946	0	0.000103925	0	0	0	0	0	0	0	4.15727e-05	0.000231493	0	0.00321559	0.00374809	0.000389102	0	0	0.00289013	0	0.00769542	4MSO
CS76937	2	Hovdala-2	0.000628101	0	0.00111653	0	0.000200116	0	0	0	0	0	0	0	7.8017e-05	0.000187529	0	0.00297484	0.00359696	0.000229229	0	0	0.00357511	0	0.0124835	4MSO
CS76938	2	Hovdala-6	0.000493143	0	0	0	0	0.000530454	0	0	0	0	0	0	0	0.000258435	0	0	0.00682267	0.000567011	0	0	0.000695939	0	0.0072819	Allyl
CS76938	1	Hovdala-6	0.00029682	0	0	0	0	0.000537036	0	0	0	0	0	0	8.06928e-05	0.000232659	0	0	0.00722434	0.000650391	0	0	0.000918093	0	0.0155871	Allyl
CS76940	1	HR-10	0.000198204	0	0.00278157	0.00419535	0	0	0	0.000167636	0.000198803	0	0	6.71673e-05	0	0.000506932	0.000228504	0.00180025	0.00392405	0.000253428	0.000287545	0	0.00272399	0	0.0110409	OH-But
CS76940	2	HR-10	9.86769e-05	0	0	0.00461514	0	0	0	0	0.000305046	0	0	2.50571e-05	0	0.000357703	0.000122363	0.000449158	0.00345994	0.000118702	0.00023774	0	0.000778326	0	0.00522993	OH-But
CS76941	1	HSm	0.00420657	0	0	0	0	0	0	0	0	0	0	0	0.000286049	0.000278566	0	0.000894964	0.0045404	0.000297319	0	0	0.00538412	0	0.0112448	3OHP
CS76941	2	HSm	0.00260372	0	0	0	0	0	0	0	0	0	0	0	4.8275e-05	0.000215385	0	0	0.00275294	0.00018245	0	0	0.0037194	0	0.00684244	3OHP
CS76942	1	IP-Hue-3	0.00020774	0	0	0	0	9.77472e-05	0	0	0	0	1.70431e-05	6.3514e-05	0	0.000540423	0	0	0.0148305	0.000639919	0	0	0.000492802	0.00267027	0.0175813	Allyl
CS76943	2	IP-Hum-2	0.000586774	0	0	0	0	0.00113991	0	0	0	0	0	0	9.12285e-05	0.000483287	0.000392228	0	0.0103195	0.000807953	0	0	0.000683433	0.00195133	0.0083742	Allyl
CS76943	1	IP-Hum-2	0.000348364	0	0	0	0	0.00130225	0	0	0	0	0	0	4.37077e-05	0.000589858	0	0	0.0151485	0.00105772	0	0	0.00072055	0	0.0107053	Allyl
CS76944	1	Iasi-1	0.00105505	0	0	0	0	0.00184913	0	0	4.75012e-05	0	0	0	6.15935e-05	0.000227786	0	0.000121742	0.00366343	0.000188689	0	0	0.00220223	0	0.00944548	Allyl
CS76944	2	Iasi-1	0.00299888	0.000149405	0	0	0	0.0121088	0	0.000198539	5.44773e-05	0	0	0	0.000773373	0.000323606	5.36597e-05	0	0.00714678	0.000544906	0	0	0.00319309	0	0.0106354	Allyl
CS76945	2	IP-Ini-0	0.00153584	0	0	7.40947e-05	0	0.00141755	0	0	4.49363e-05	0	0	0	0.000279944	0.000300453	0	0	0.00668099	0.000523857	0	0	0.00304478	0	0.0123572	Allyl
CS76945	1	IP-Ini-0	0.00114198	0	0	0	0	0.00124762	0	0	5.76212e-05	0	0	0	0.000199113	0.000272791	0	0	0.00644433	0.000405044	0	0	0.00363556	0	0.0139444	Allyl
CS76947	1	ISS-20	0	0	0.00183469	0.00237976	0	0	0	0.000463693	8.83066e-05	0	0	4.3112e-05	0	0.000383212	0	0.00280236	0.00323583	0.000334184	0.000306078	0	0.00261135	0	0.00890906	OH-But
CS76947	2	ISS-20	0	0	0	0.00737713	0	0	0	0.000732692	0.000167473	0	0	0	0	0.000320806	0.000135938	0.0049049	0.0026524	0.00034239	0.000338532	0	0.00296307	0	0.00836837	OH-But
CS76948	1	IST-29	0	0	0.00118452	0.00198229	0	0	0	0	0.000156159	0	0	0.000175712	0	0.00105354	0	0.00276357	0.00488607	0.000247354	0	0	0.00277231	0	0.00869628	OH-But
CS76948	2	IST-29	0	0	0	0.00311664	0	0	0	0	0.00016494	0	0	7.36891e-05	0	0.000842073	0	0.00186245	0.00583974	0.000141348	0.00033004	0	0.000925698	0	0.00794774	OH-But
CS76950	1	Istisu-5	0.00505592	0	0.000196192	0	0	0	0	0	0	0	0	0	0.0021233	0.000103524	0	0.000170335	0.00164032	0.000442813	0	2.70718e-05	0.00537578	0	0.00743327	3OHP
CS76953	1	Istisu-9	0.00828695	0	0.000139897	0	0	0	0	0	0	0	0	0	0.00356008	0.000151224	0	0.000238888	0.00285394	0.000364199	0	0	0.00822881	0	0.00924738	3OHP
CS76954	1	Ivano-1	0.000556955	0	0	0	0	0.0012503	0	0	0	0	0	5.70514e-05	0.000336965	0.000827856	0	0	0.0118881	1.89113e-05	0	0	0.00106755	0	0.0132174	Allyl
CS76956	2	Jl-2	0.00394093	0	0	0	0	0	0	0	0	0	0	0	0.000214633	0.000172764	0	0	0.00310815	4.92056e-05	0	0	0.00467024	0	0.0136793	3OHP
CS76956	1	Jl-2	0.00787693	0	0	0	0	0	0	0	0	0	0	0	0.00115823	0.000179133	0	0.00022049	0.00419654	0.000209276	0	0	0.00442724	0	0.0110771	3OHP
CS76959	1	Kal 1	0.00077538	0	0	0	0	0.000434027	0	0	7.60068e-05	0	0	0	0.00027857	0.000234835	0	0	0.00685185	0.000449549	0	0	0.000947622	0	0.0135017	Allyl
CS76962	1	Kardz-1	0.000146182	0	0.000335258	0.000553915	0	0.0003708	0	0.000267171	6.07055e-05	0	0	0	0	0.000125683	0	0.000737924	0.00221661	0.000171928	0	0	0.000727683	0	0.00603137	OH-But
CS76962	2	Kardz-1	0.00036069	0	0	0.00284369	0	0.000982785	0	0.00141118	7.7262e-05	0	0	0	0	0.000412778	0.00017664	0.000980059	0.0049128	0.000546769	0	0	0.00242325	0	0.0115336	OH-But
CS76963	1	Kardz-2	0.000181306	0	0.000477596	0.000591445	0	0.000312734	0	0.000150997	0.000139712	0	0	0	0	0.000280326	0	0.000873213	0.00529854	0.000429949	0	0	0.00104142	0	0.0162696	OH-But
CS76963	2	Kardz-2	0.000372173	0	0	0.00118708	0	0.000477985	0	0.000219334	0.000273249	0	0	0	0	0.000239186	0	0.000601905	0.00506247	0.000360685	0	0	0.000674519	0.00300967	0.0109869	OH-But
CS76964	2	K??vlinge-1	0.000944646	0	0	0	0	0.000754423	0	0	0	0	0	0	9.3027e-05	0.000282558	0.000817317	8.97462e-05	0.00558217	0.000553435	0	0	0.00138974	0.00137854	0.00533804	Allyl
CS76964	1	K??vlinge-1	0.00023837	0	0	0	0	0.000255794	0	0	0	0	0	0	6.16748e-05	0.000335547	0	0	0.00824363	0.000593974	0	0	0.00104169	0	0.00809239	Allyl
CS76965	1	KBG1-14	0.00273238	0.000368638	0	0	0	0.00199038	0	0	0	0	0	0	0.00260867	0.000309968	0	0.000892474	0.00546503	9.67288e-05	0	0	0.00391295	0	0.0099467	Allyl
CS76965	2	KBG1-14	0.00202294	0	0.000142189	0	0	0.0018504	0	0	0	0	0	0	0.0003805	0.000170883	0	0	0.00272354	0.000113726	0	0	0.00410729	0	0.00880365	Allyl
CS76966	2	KBG2-13	0.00557718	0	0	0	0	0	0	0	0	0	0	0	0.000151219	0.000152745	0	0	0.00218492	0.000169858	0	0	0.00510543	0	0.0104295	3OHP
CS76966	1	KBG2-13	0.00585434	0	0	0	0	0	0	0	0	0	0	0	0.000571544	0.000153163	0	0.000199423	0.00257634	0.000220624	0	0	0.00500644	0	0.0115104	3OHP
CS76967	2	Kent	0.00365963	0	0	0	0.00010845	0	0	0	0	0	0	0	8.56104e-05	0.00036734	0	0	0.00456194	2.93677e-05	0	0	0.00385498	0	0.00880616	3OHP
CS76967	1	Kent	0.00565149	0	0	0	0	0	0	0	0	0	0	0	0.0023157	0.000114619	0	0.00021822	0.00296507	0.000241512	0	0	0.0049363	0	0.0102075	3OHP
CS76968	1	Kia 1	0.000471356	0	0	0	0	0.000464778	0	0	0	0	1.37456e-05	0	0.000105128	0.000359603	0	3.54692e-05	0.00758606	0.00065204	0	0	0.000532394	0.00269347	0.0141901	Allyl
CS76969	1	Kn-0	0.00260167	0	0	0	0	0	0	0	0	0	0	0	0.000174843	0.000197546	0	0.000145924	0.00374793	0.000162151	0	0	0.00332667	0	0.00761004	3OHP
CS76969	2	Kn-0	0.00196512	0	0	0	0	0	0	0	0	0	0	0	5.78876e-05	0.000195891	0	0	0.00312078	0.000216874	0	0	0.00367933	0	0.00830403	3OHP
CS76970	1	Kni-1	0.000126063	0	0.000697012	0	0.000687461	0	7.81756e-05	0	0	0	0	0.000212199	7.12297e-05	0.00118671	0	0.00425323	0.0105455	0.000245633	0.000327805	0	0.000974764	0	0.00476507	4MSO
CS76970	2	Kni-1	0.000194932	0	0.00160034	0	0.000466039	0	4.96186e-05	0	0	0	0	0.000120788	9.91738e-05	0.000675373	0	0.00622286	0.00621125	0.00084093	0.000523228	0	0.0023813	0	0.00779671	4MSO
CS76971	1	Knjas-1	0.000982072	0	0	0	0	0.002595	0	0	0	0	0	0	0.000403131	0.000120837	0	0.00015637	0.0045333	0.000209787	0	0	0.000993126	0	0.014047	Allyl
CS76971	2	Knjas-1	0.00166522	0	0	7.10614e-05	0	0.00272792	0	0	0	0	0	0	0	0.000165655	0	0	0.00370265	8.44363e-05	0	0	0.00382263	0	0.0145212	Allyl
CS76974	2	Kolar-1	0.0004051	0	0.00117577	0.000761061	0	0.0011167	0	0.00112897	0	0	0	6.58436e-05	0	0.00045156	0.000195294	0.00121425	0.00312208	0.000370971	0.000173711	0	0.00123412	0	0.00732381	OH-But
CS76974	1	Kolar-1	0.000341435	0	0.0010666	0.00106864	0	0.000688971	0	0.000475131	0	0	0	0	0	0.000366139	0.000131581	0.00129554	0.00374444	0.000359693	0.000197482	0	0.000462383	0.00148384	0.00632506	OH-But
CS76976	1	PHW-3	0.00400294	0	0	0	0	0	0	0	0	0	0	0	0.0003466	0.000132601	0	0.000160919	0.0034868	0.000530268	0	0	0.00237089	0	0.0108173	3OHP
CS76976	2	PHW-3	0.00211929	0	0	0	0	0	0	0	0	0	0	0	0	7.60786e-05	0	0	0.00168246	0.000490778	0	0	0.00253073	0	0.00791959	3OHP
CS76981	1	Kor 3	0.0016724	0	0	0	0	0.00132352	0	0	0	0	0	0	8.33525e-05	0.000563721	0	0	0.00959433	0.000268172	0	0	0.0011933	0.00319854	0.0132495	Allyl
CS76981	2	Kor 3	0.00162568	0	0	0.000171446	0	0.00256186	0	0	0	0	0	2.38716e-05	7.48013e-05	0.000490017	0	0	0.00804822	0.000199726	0	0	0.00118927	0	0.0073425	Allyl
CS76982	2	Kor 4	0.000800814	0	0	0.000119628	0	0.00136956	0	0	0	0	0	0	9.345e-05	0.000196242	0	0	0.00358203	0.000336833	0	0	0.00250444	0	0.0111846	Allyl
CS76982	1	Kor 4	0.00144875	0	0	0	0	0.00140852	0	0	0	0	0	0	0.000343963	0.000429852	0	0	0.00665613	0.000339984	0	0	0.00470781	0	0.0145772	Allyl
CS76983	1	Koren-1	0.000411583	0	0.000613634	0.00104728	0	0.000729772	0	0.000580972	6.00784e-05	0	0	0	0	0.000317316	0.000105374	0.00187943	0.00640045	7.25085e-05	0	0	0.00101253	0.00215619	0.00739203	OH-But
CS76983	2	Koren-1	0.000699176	0	0	0.00172004	0	0.00179327	0	0.00140525	0	0	0	3.91256e-05	0	0.000350846	0.000151879	0.00209448	0.00511782	5.23523e-05	0	0	0.00104723	0	0.00569722	OH-But
CS76984	1	Krazo-1	0.000447449	0	0	0	0	0.00171943	0	0	0	0	0	0	5.56177e-05	0.000180604	0	0	0.00598911	0.000526548	0	0	0.00080877	0	0.0102304	Allyl
CS76990	1	Kus2-2	0.00388155	0.000154302	0	0	0	0	0	0	0	0	0	0	0.00273294	0.000154175	6.73401e-05	0.00109892	0.00353718	2.59756e-05	0	0	0.00532341	0	0.0110308	3OHP
CS76990	2	Kus2-2	0.00428945	0	0	0	0	0	0	0	0	0	0	0	0.000156478	0.000102498	0	0	0.00224823	6.97367e-05	0	0	0.006425	0	0.0111307	3OHP
CS76991	2	Kus3-1	0.00431028	0	0	0	0	0	0	0	0	0	0	0	0.000100476	0.000102727	0	0	0.00238226	0.000415337	0	0	0.00506907	0	0.00966991	3OHP
CS76991	1	Kus3-1	0.0044945	0	0	0	0	0	0	0	0	0	0	0	0.000330612	0.000158684	0	0.00115149	0.00372241	0.000256059	0	0	0.00456233	0	0.0111114	3OHP
CS76996	2	IP-Lac-0	0.000193348	0	0.00229908	0.00118757	0	0	0	0.00116811	0	0	0	0	0	0.000200215	0.00021196	0.00310596	0.00202797	0.000185609	0.000487056	0	0.00383704	0	0.00658632	OH-But
CS76996	1	IP-Lac-0	0.000207996	0	0.00266064	0.0017723	0	0	0	0.0020097	0	7.13514e-05	0	0	0	0.000415623	0.000298395	0.00418756	0.00356332	0.000295384	0.000541963	0	0.00446638	0	0.0118528	OH-But
CS76997	2	IP-Laf-1	0.00010634	0	0	0.00464489	0	0	0	0.000109216	0.000164827	0	0	0	0	0.000132805	9.29748e-05	0.00160015	0.00172626	0.00020301	0.000199917	0	0.00368873	0	0.00505917	OH-But
CS76997	1	IP-Laf-1	0	0	0.00430777	0.00424184	0	0	0	0.000275195	8.75563e-05	0	0	5.46582e-05	0	0.000372055	0.000131653	0.00358708	0.0031269	0.000255105	0.000373016	0	0.00543356	0	0.0102123	OH-But
CS76998	2	Lag1-2	0	0	0	0.00582839	0	0	0	0.00034453	0.000373439	0	0	0	0	0.000308382	0.000165119	0.00311238	0.00375388	0.000123199	8.03053e-05	0	0.00304539	0	0.00731697	OH-But
CS76998	1	Lag1-2	7.31024e-05	0	0.00167555	0.00334851	0	0	0	0.000273722	0.000340175	0	0	0	0	0.00035973	0	0.0038685	0.00547772	0.000127878	8.54411e-05	6.26999e-06	0.00293578	0	0.0100737	OH-But
CS76999	2	Lag1-4	0.000189802	0	0	0.00705492	0	0	0	0.000289541	0.000298801	0	0	0	0.000126597	0.000450668	0	0.00597266	0.00413908	0.000100642	0	0	0.00319832	0	0.0063502	OH-But
CS76999	1	Lag1-4	0.000120255	0	0.000646842	0.00191947	0	0	0	8.34343e-05	0.000163345	0	0	0	3.92705e-05	0.000329652	0	0.00206339	0.00685737	9.83904e-05	5.93017e-05	0	0.00164485	0	0.00871213	OH-But
CS77000	1	Lag1-5	0.000211971	0	0.00114396	0.00176524	0	0.000202711	0	6.50992e-05	6.94904e-05	0	0	3.50169e-05	0	0.000405107	0	0.0023754	0.0050593	0.000276428	0.000206894	0	0.00211457	0	0.0124215	OH-But
CS77000	2	Lag1-5	0.000538945	0	0	0.0055032	0	0	0	0.000162116	0	0	0	0	0	0.000396239	0	0.00287352	0.00363822	0.000296412	0.000197072	0	0.00369015	0	0.00681991	OH-But
CS77001	2	Lag1-6	0.000788466	0	0	0.00179432	0	0.00129077	0	0.000108256	0	0	0	3.12367e-05	0.000154277	0.00022378	0	0.00144754	0.00418826	9.17395e-05	0	0	0.00355465	0	0.00979327	OH-But
CS77001	1	Lag1-6	0.000632916	0	0.000651143	0.0011108	0	0.00131598	0	0.000112355	5.74219e-05	0	0	0	0.000209139	0.000298571	0	0.00186573	0.00520647	5.66154e-05	0	0	0.00308846	0	0.0123986	OH-But
CS77002	1	Lag1-7	0.00010018	0	0.00123548	0.00255723	0	0	0	0.000290037	0.000289254	0	0	0	0	0.000385663	0.000187271	0.0037428	0.00516662	0.000129583	7.72616e-05	6.71148e-06	0.00334194	0	0.0117981	OH-But
CS77002	2	Lag1-7	0	0	0	0.00464728	0	0	0	0.00031149	0.000209805	0	0	0	0	0.000286275	0.000128218	0.00314272	0.00419956	0.000113858	5.29673e-05	0	0.0032684	0	0.0104952	OH-But
CS77003	1	Lag1-8	0.00013831	0	0.000847431	0.00221879	0	0.000593708	0	0.000219814	0.000147257	0	0	0	0	0.000215486	0	0.00249233	0.00413233	0.000166742	5.95628e-05	0	0.00110122	0	0.00917714	OH-But
CS77003	2	Lag1-8	0.000438238	0	0	0.00799731	0	0	0	0.000528294	0.000193712	0	1.64941e-05	0	0	0.000304112	0	0.00365861	0.00350375	0.000290893	9.17784e-05	0	0.00302805	0	0.00609122	OH-But
CS77004	1	Lag2-10	0.00249878	0	0.000582349	0	7.91004e-05	0	0	0	0	0	0	0	0.00046876	0.000287802	0	0.00176103	0.00550907	0.000216654	0	0	0.00109954	0	0.0121596	3OHP
CS77004	2	Lag2-10	0.00504491	0	0.00130668	0	0.000157458	0	0	0	0	0	0	0	0.000690936	0.000161405	0.00166114	0.00152339	0.00284299	0.000116922	0	0	0.00446222	0	0.0109346	3OHP
CS77005	2	Lag2-4	0.00963813	0	0.00284332	0	0.000418469	0	0	0	0	0	0	0	0.000556476	0.000282652	0	0.00535049	0.00438208	0.000191154	0	0	0.00518542	0	0.00662196	3OHP
CS77005	1	Lag2-4	0.00340714	0	0.00122786	0	0.000119195	0	0	0	0	0	0	0	0.000569042	0.000301625	0	0.00244382	0.00697303	7.53512e-05	0	0	0.00391654	0	0.012155	3OHP
CS77006	1	Lag2-6	0.00339573	0	0.00121989	0	0	0	0	0	0	0	0	0	0.000390779	0.000237246	0	0.00205829	0.00599495	5.82398e-05	0	0	0.00365685	0	0.010797	4OHB
CS77006	2	Lag2-6	0.00390571	0	0.00179171	0	0.000170518	0	0	0	0	0	0	0	0.000639534	0.000223347	0	0.0035977	0.00394596	5.77558e-05	0	0	0.00458136	0	0.00822709	4OHB
CS77007	1	Lag2-7	0.00270584	0	0.000530464	0	0	0	0	0	0	0	0	0	0.000583067	6.97826e-05	0	0.000750377	0.00159122	0.000112362	0	0	0.00361511	0	0.00555327	3OHP
CS77008	2	IP-Lam-0	0.00111817	0.000342342	0	8.47674e-05	0	0.00198265	0	0	0	0	0	0	0.00403839	0.000262656	0	0	0.0109136	0	0	0	0.00328764	0	0.0127542	Allyl
CS77008	1	IP-Lam-0	0.000583419	0.000173472	0	0	0	0.000731805	0	0	0	0	0	0	0.00165619	0.000139612	0	8.84156e-05	0.00695791	0	0.000101568	0	0.00252979	0	0.0115837	Allyl
CS77009	1	Lan 1	0.00029753	0	0	0	0	0.000201493	0	0	0.000163488	0	0	0	4.70497e-05	0.000335994	0	0	0.00771414	0.000558085	0	0	0.000722928	0.0037149	0.0168515	Allyl
CS77010	1	IP-Lch-0	0.00100407	0	0	0	0	0.00230213	0	0	6.35721e-05	0	0	0	0.00150744	0.000288477	0	4.81302e-05	0.0087857	0	0	0	0.0015449	0.00142661	0.00957378	Allyl
CS77010	2	IP-Lch-0	0.0010697	0	0	6.58595e-05	0	0.00154416	0	0	4.75893e-05	0	0	0	0.00222344	0.000190033	0	0	0.00557421	0	0	0	0.00318058	0	0.0129696	Allyl
CS77012	1	IP-Ldd-0	0.000483066	0	0	0	0	0.00106558	0	0	0	0	1.32232e-05	0	0.000142553	0.000314971	0	3.86018e-05	0.00686458	0.000478931	0	0	0.000934799	0.00284363	0.0117447	Allyl
CS77013	1	LDV-18	9.39701e-05	0	0.00288353	0.0032596	0	0	0	0.000136781	0.00018784	0	0	0.000102622	4.97887e-05	0.000617172	0.000205229	0.0014724	0.00404371	0.000385752	0.000459099	0	0.0042563	0	0.0107919	OH-But
CS77013	2	LDV-18	0	0	0	0.00598135	0	0	0	5.40063e-05	0.00033554	0	0	4.36579e-05	0	0.00046318	0.000154645	0.000705178	0.00353984	0.00026166	0.000226765	0	0.00394187	0	0.00907849	OH-But
CS77014	2	LDV-46	0.000143811	0	0	0.00720475	0	0	0	6.67321e-05	0.000330312	0	0	5.14696e-05	4.31066e-05	0.000515086	0	0.00129007	0.00302855	0.000261592	0.000333809	0	0.00426184	0	0.00870636	OH-But
CS77014	1	LDV-46	0.000104459	0	0.00349082	0.00370201	0	0	0	0.000153866	0.000200547	0	0	9.28325e-05	5.5985e-05	0.000597072	0.000225277	0.00168997	0.00389274	0.000392054	0.000465296	0	0.00363255	0	0.00996089	OH-But
CS77018	1	LEC-25	0	0	0.00133124	0.00185404	0	0	0	0.000211522	0	0	0	0	0	0.000302972	0.000104571	0.00145034	0.00323269	0.000228453	0.000154413	0	0.00260775	0	0.0106643	OH-But
CS77018	2	LEC-25	0.000168527	0	0	0.00599533	0	0	0	0.000281027	0.000156641	0	0	6.07171e-05	8.10856e-05	0.000435466	0.00022116	0.00347236	0.0033535	0.000257687	0.000367637	0	0.00352831	0	0.00814032	OH-But
CS77019	1	IP-Leg-0	0.00060492	0	0	0	0	0.00102402	0	0	4.4267e-05	0	0	0	0.000309833	0.000225875	0	4.80554e-05	0.00805424	0.000198793	0	0	0.00233813	0	0.0166736	Allyl
CS77019	2	IP-Leg-0	0.00119578	0	0	9.37852e-05	0	0.00312696	0	0	9.97059e-05	0	0	0	0.000273592	0.000222602	0	0	0.00800712	0.000266488	0	0	0.000910944	0	0.012684	Allyl
CS77021	1	Ler-1	0.000204843	0	0	0	0	0	0	0	0	0	0	0	0	0	0	0	7.67043e-05	0	0	0	0.000103697	0	0.000222395	3OHP
CS77021	2	Ler-1	0.00430341	0	0	0	0	0	0	0	0	0	0	0	0.000649275	0.000110335	0	0	0.00298817	4.7928e-05	0	0	0.00526272	0	0.00903375	3OHP
CS77023	1	Lerik1-4	0.00697951	0	0.000133008	0	0	0	0	0	0	0	0	0	0.00103963	0.000103717	0	0.000114861	0.00185567	0.000203629	0	0	0.00884085	0	0.00581083	3OHP
CS77024	1	Lerik1-7	0.0035293	0	0.000138003	0	0	0	0	0	0	0	0	0	0.00084815	0.000178369	0	0.000119011	0.00252749	0.000411397	0	0	0.00485853	0	0.0094451	3OHP
CS77025	1	Lerik2-1	0.00531833	0	0.000174644	0	0	0	0	0	0	0	0	0	0.00154049	0.000123562	0	0.000215838	0.00278088	0.000213645	0	0	0.00619968	0	0.0104524	3OHP
CS77026	1	Lerik2-3	0.00510488	0	0.000160548	0	0	0	0	0	0	0	0	0	0.00291434	8.1165e-05	0	0.000200769	0.00170179	0.000344568	0	0	0.008254	0	0.00544208	3OHP
CS77028	1	Lerik2-6	0.00747157	0	0.000308712	0	0	0	0	0	0	0	0	0	0.00160937	0.000153203	0	0.000187675	0.00263658	0.000229271	0	3.35803e-05	0.00785871	0	0.0100716	3OHP
CS77029	2	Lerik2-7	0.00100613	0	0	0	0	0.00142883	0	0	6.44255e-05	0	0	0	0.00016788	0.000404889	0.00049905	0	0.00785558	0.000463406	0	0	0.000885437	0	0.00938981	Allyl
CS77029	1	Lerik2-7	0.000437825	0	0	0	0	0.000558231	0	0	0.000137131	0	0	5.05584e-05	5.81015e-05	0.000435844	0	0	0.012584	0.000319745	0	0	0.000814815	0.00196389	0.0154714	Allyl
CS77030	1	Leska-1-44	0.000200276	0	0.00074698	0.00215668	0	0.00089088	0	0.000799399	0	0	0	3.46605e-05	0.000438356	0.000440039	0	0.00109234	0.00643028	4.99974e-05	7.15214e-05	0	0.000973919	0.00249511	0.00856132	OH-But
CS77030	2	Leska-1-44	0.000402778	0	0	0.00443683	0	0.00143643	0	0.001077	0	0	0	3.10274e-05	0.000259878	0.000497649	0.000177253	0.00211109	0.0057137	0.000153546	0	0	0.00198818	0	0.00783647	OH-But
CS77032	1	Lesno-1	0.000665948	0	0	0	0	0.0013188	0	0	0	0	0	0	4.66275e-05	9.34611e-05	0	0	0.00314108	0.000279647	0	0	0.00158379	0	0.00787888	Allyl
CS77032	2	Lesno-1	0.0013891	0	0	0	0	0.002001	0	0	0	0	0	0	0.000196905	0.000250967	0	0	0.00353093	0.00036835	0	0	0.00329424	0	0.0116767	Allyl
CS77033	1	Lesno-2	0.00117548	0	8.69807e-05	0	0	0.00227292	0	0	0	0	0	0	0.000179554	0.000116781	0	0	0.00404854	0.000375698	0	0	0.00323054	0	0.00979984	Allyl
CS77033	2	Lesno-2	0.00118579	0	0	0	0	0.00428238	0	6.02445e-05	0	0	0	0	0.000139247	0.000163621	0	0	0.00369376	0.000781963	0	0	0.000735456	0	0.00631376	Allyl
CS77034	2	Lesno-4	0.000980329	0	0	0	0	0.00189281	0	0	0	0	0	0	9.48303e-05	0.000198889	0	0	0.00364126	0.000360004	0	0	0.00232934	0	0.00902707	Allyl
CS77034	1	Lesno-4	0.00114489	0	0	0	0	0.00224545	0	0	0	0	0	0	0.000201272	0.000117399	0	0	0.00442689	0.000464317	0	0	0.00304872	0	0.0109797	Allyl
CS77035	1	Li-7	0.0059677	0	0	0	0	0	0	0	0	0	0	0	0.00112057	0.000168051	0	0.000198652	0.00555644	4.34165e-05	0	0	0.0055635	0	0.0148154	3OHP
CS77035	2	Li-7	0.00198735	0	0	0	0	0	0	0	0	0	0	0	0	5.30479e-05	0	0	0.00180111	0.000119309	0	0	0.00410913	0	0.00743031	3OHP
CS77039	1	Lill??-1	0.000343573	0	0	0	0	0.000892052	0	0	0	0	0	0	0.000151678	7.11349e-05	0	0	0.00343057	0.000177431	0	0	0.00082881	0.00219884	0.0111116	Allyl
CS77042	2	Lis-1	0.00209631	0	0	0	0	0.0033086	0	0	5.33814e-05	0	0	0	0.000245955	0.000492984	0.000899476	0	0.00593996	0.000351824	0	0	0.00291891	0	0.00714662	Allyl
CS77042	2	Lis-1	0.00131024	0	0	0	0	0.00133534	0	0	4.15006e-05	0	0	0	0.000120446	0.000226254	0	0.000520955	0.00534294	0.000206733	0	0	0.00402472	0	0.00961743	Allyl
CS77042	1	Lis-1	0.00102767	0	0	0	0	0.0013842	0	0	0	0	0	0	0.000224154	0.000292764	0	0	0.00672977	0.000130222	0	0	0.00439126	0	0.0128785	Allyl
CS77044	2	Lis-3	0.00140209	0	0	0	0	0.000980909	0	0	5.79718e-05	0	0	0	0.000257093	0.000146998	0	0	0.00322181	0.000239743	0	0	0.0031796	0	0.0124831	Allyl
CS77044	1	Lis-3	0.00125883	0	0	0	0	0.0013027	0	0	6.13396e-05	0	0	0	0.00022111	0.000165595	0	0	0.0047721	0.000263244	0	0	0.0027348	0	0.0133474	Allyl
CS77047	2	LL-0	0	9.42927e-05	0	0	0.000167657	0	0	0	0.000180442	0	0	0	0.000189133	0.000231245	0	0.00475574	0.00315719	4.85298e-05	0.000120289	0	0.00101822	0	0.00879174	4MSO
CS77047	1	LL-0	0	0	7.79124e-05	0	0.0002474	0	0	0	0.000255244	0	0	0	0.000324127	0.000424844	0	0.00533491	0.00469392	3.93394e-05	0.000163453	1.0672e-05	0.000708536	0.00227378	0.0129274	4MSO
CS77048	1	Lom1-1	0.00164007	0	0	0	0	0	0	0	0	0	0	0	0.000345476	0.000173157	0	0.000127123	0.00722819	3.18042e-05	0	0	0.0029571	0	0.0120702	4MSO
CS77048	2	Lom1-1	0.00129612	0	0.00133939	0	0.000619881	0	0	0	0	0	0	4.15148e-05	4.86151e-05	0.000512839	0	0.00397366	0.00597911	0.000427003	0	0	0.00360616	0	0.0117302	4MSO
CS77052	2	Lp2-6	0.00193869	0	0	0	0	0	0	0	0	0	0	0	0.000677637	0.000116585	0	0	0.00264871	8.27547e-05	0	0	0.0033381	0	0.0133197	3MSO
CS77052	1	Lp2-6	0.0017978	0.000190865	0	0	0	0	0	0	0	0	0	0	0.00476241	0.000165228	0	0.000234895	0.00503629	0	0	0	0.00256541	0	0.011723	3MSO
CS77054	2	IP-Lro-0	0.0011573	0	0	0.000245579	0	0.00106337	0	0	6.13475e-05	0	0	0	0.000499936	0.000344681	0	0	0.0106858	0.000339854	0	0	0.00233285	0	0.0150213	Allyl
CS77054	1	IP-Lro-0	0.00043412	0	0	0	0	0.000222153	0	0	0	0	0	0	5.75939e-05	3.72139e-05	0	0	0.00248649	0.000123912	0	0	0.00127505	0	0	Allyl
CS77055	1	IP-Lso-0	0.000146673	0	0.000428867	0.0009321	0	0.000537776	0	0.000189947	0.000146777	0	0	4.66217e-05	0	0.00065968	0	0.00114901	0.0077338	0.000198158	0	0	0.00111536	0	0.00729272	OH-But
CS77056	2	Lu-1	0.00198954	0	0	0	0	0	0	0	0	0	0	0	6.75929e-05	7.81921e-05	0	0	0.0021141	0.000223168	0	0	0.00369589	0	0.00657095	3OHP
CS77056	1	Lu-1	0.00269135	0	0	0	0	0	0	0	0	0	0	0	0.000174714	0.00012969	0	0.000134009	0.00382912	0.000160743	6.97306e-05	0	0.00401008	0	0.0117759	3OHP
CS77057	1	Lu3-30	0.001827	0.000170834	0	0	0	0.00491529	0	0	0	0	0	0	0.000998557	0.000168987	0	0	0.00327196	0.000224199	0	0	0.00420295	0	0.00940847	Allyl
CS77057	2	Lu3-30	0.00115968	0	0	0.000191301	0.00274616	0	0	0	0	0	0	0	9.2165e-05	0.000193352	0	0	0.00207381	0.000228993	0.000150434	0	0.00227381	0	0.00599977	Allyl
CS77058	2	Lu4-2	0.000785225	0	0	0	0	0.004061	0	0	0	0	0	0	0.000146067	0.000139218	0	0	0.00366675	0.000288256	0	0	0.00285352	0	0.0082574	Allyl
CS77058	1	Lu4-2	0.00160413	0.000104427	0	0	0	0.00604533	0	0	0	0	0	0	0.000886115	0.000134433	0	0	0.00383471	0.000309458	0	0	0.00376436	0	0.00942397	Allyl
CS77059	2	IP-Lum-0	0.000292915	0	0	0.00309145	0	0.000259418	0	8.07068e-05	0.000204129	0	0	0	0	0.000507359	6.59943e-05	0.000450793	0.00540032	0.000182047	0.000160641	0	0.00130733	0	0.0102114	OH-But
CS77059	1	IP-Lum-0	0.000160394	0	0.00116539	0.00207784	0	0.000402009	0	9.43612e-05	0.000123895	0	0	5.20257e-05	0	0.000472448	0.000143339	0.000366598	0.00590738	0.000322903	0.000158483	0	0.00305938	0	0.0147074	OH-But
CS77060	1	Lund	9.96987e-05	0	0.000550432	0	0	0	0	0	0	0	0	5.60003e-05	0	0.000407088	0	0.00154418	0.00429527	0.000376018	0.000375937	0	0.0012101	0	0.00831053	4MSO
CS77060	2	Lund	0.00025002	0	0.00187114	0	0.000408039	0	0	0	0	0	0	0.00013744	0	0.000937517	0	0.00356197	0.00605028	0.000605863	0.000374631	0	0.000914825	0	0.00530524	4MSO
CS77061	1	IP-Mac-0	0.00055072	0	0	0	0	0.00110728	0	0	4.10784e-05	0	0	0	0	0.00021521	0	0	0.00420291	0.000153805	0	0	0.0011114	0.00159502	0.00703329	Allyl
CS77061	2	IP-Mac-0	0.00162748	0	0	0	0	0.00353739	0	0	7.89916e-05	0	0	0	0.000219094	0.000399646	0.000851535	0	0.00706714	0.000539543	0	0	0.0020502	0.00253884	0.0104779	Allyl
CS77062	2	IP-Mad-0	0	0	0	0.00551411	0	0	0	0.00013452	0.000697551	0	0	0	0	0.00040474	0.000137817	0.00122353	0.00331664	0.000158232	0	0	0.000853648	0	0.00449085	OH-But
CS77062	1	IP-Mad-0	0	0	0.00192012	0.00349809	0	0	0	0.000172844	0.000369227	0	0	0.000150607	0	0.000541046	6.74563e-05	0.00279343	0.00475547	8.41327e-05	5.70575e-05	1.36461e-05	0.00295197	0	0.0122287	OH-But
CS77063	2	IP-Mah-6	0.00020793	0	0	0.00846255	0	0	0	0.000801412	0.00121822	0	0	0.000120236	0	0.000945197	0	0.00341973	0.00479476	0.000325634	0.000196734	1.27657e-05	0.0016395	0.00573246	0.006208	OH-But
CS77063	1	IP-Mah-6	7.76642e-05	0	0.00125035	0.00264859	0	0	0	0.000338688	0.000810581	0	0	0.000110373	0	0.00127676	0	0.00166193	0.00825309	0.000301937	8.32092e-05	0	0.00307609	0	0.0131662	OH-But
CS77068	1	IP-Mar-1	0.000257248	0	0.000210265	0.000412453	0	0.00158998	0	0.000529172	0	0	0	3.86853e-05	0	0.00026824	0	8.92078e-05	0.0108686	0.000563768	0.000258004	0	0.00102083	0	0.0159128	Allyl
CS77069	1	MAR-4-16	0.00144747	0	0.000137524	0.000126452	0	0.00256223	0	0	0	0	0	0	0.000409161	0.000200573	0	0	0.00647025	0.00033143	0	0	0.00359121	0	0.0132123	Allyl
CS77069	2	MAR-4-16	0.00233808	0	0	0.000290442	0	0.00301868	0	0	0	0	0	0	0.000717508	0.000183376	0	0	0.00369783	0.000208653	0	0	0.00431083	0	0.0107903	Allyl
CS77070	1	MAR2-3	0.00130269	0	0	0.0029924	0	0	0	0	0	0	0	0	0.000994974	8.83941e-05	0	0	0.00288482	0.000199614	0	0	0.00283899	0	0.00937085	Allyl
CS77070	2	MAR2-3	0.00116157	0	0	0.000139069	0	0.00239469	0	0	0	0	0	0	0.000271073	0.000129068	0	0	0.00291913	0.000163544	0	0	0.00299304	0	0.00851334	Allyl
CS77071	1	Marce-1	9.75389e-05	0	0.00156503	0.00240985	0	0	0	0.000525596	0	0	0	3.38247e-05	0	0.000337685	0	0.00169665	0.00281554	0.000172154	0.000255656	0	0.00258699	0	0.00882595	OH-But
CS77071	2	Marce-1	0	0	0	0.00354631	0	0.000325626	0	0.000790972	0	0	0	0	0	0.000326447	0	0.00102633	0.00345023	0.000133888	0	0	0.00126316	0	0.00865154	OH-But
CS77072	2	Marti-1	0	0	0	0.00230079	0	0	0	0.000116618	0	0	2.75369e-05	0	0.000428286	0.000614186	0	0.00452743	0.0083045	0.000509013	0.000258605	0	0.000636229	0.00283716	0.00955763	OH-But
CS77072	1	Marti-1	0	0	0.00044578	0.000674639	0	0	0	0	0	0	0	4.38655e-05	0.000214321	0.000530148	0	0.00233575	0.00660925	0.000154154	0.000112337	0	0.00108395	0	0.0104835	OH-But
CS77074	1	IP-Mat-0	0	0	0.000541369	0.00157307	0	0	0	0	0.000415748	3.31969e-05	0	0	0	0.000264742	0	0.00195766	0.00517511	0.000116636	7.46339e-05	7.78699e-06	0.000867822	0.00278495	0.0140169	OH-But
CS77074	2	IP-Mat-0	0	0	0	0.00322356	0	0	0	7.14971e-05	0.000299331	0	0	0	0.000107154	0.000259596	5.07387e-05	0.00182766	0.00291587	0.000107906	0.000107237	0	0.00227774	0	0.00882517	OH-But
CS77078	2	Melic-1	0	0	0	0.00512107	0	0	0	0.000411671	0.000145829	0	0	0	0	0.000304566	0	0.00123059	0.00216583	0.000199741	0.000262933	0	0.00278824	0	0.00561932	OH-But
CS77078	1	Melic-1	0	0	0.00394602	0.00484456	0	0	0	0.00136008	9.17012e-05	0	0	7.84425e-05	0	0.000489804	0.000246599	0.00206901	0.00376248	0.000379777	0.000228971	0	0.00382494	0	0.0117487	OH-But
CS77079	1	Melni-1	0.000193973	0	0.000973106	0.00107179	0	0.000299112	0	0.000165905	0	0	0	0	0	0.000311892	7.77542e-05	0.001448	0.00461633	0.000369626	0.000151503	0	0.00288374	0	0.0167973	OH-But
CS77079	2	Melni-1	0.00149821	0	0	0.0032707	0	0.00170874	0	0.000695399	0	0	0	4.50267e-05	0.000233461	0.000431651	0	0.00141108	0.00473142	0.000286993	0	0	0.0036851	0	0.00621195	OH-But
CS77079	2	Melni-1	0.000313999	0	0	0.00228953	0	0.000317081	0	0.000124799	0	0	0	2.67164e-05	0	0.000381645	4.54261e-05	0.000607169	0.00456951	0.000221289	0.000126287	0	0.00320257	0	0.0157969	OH-But
CS77081	2	IP-Men-2	0.000563329	0.00010845	0	5.83796e-05	0	0.000462705	0	0	0	0	0	0	0.00345044	0.000149121	0	0	0.0054261	0.000465663	0	0	0.00176854	0	0.0110601	Allyl
CS77081	1	IP-Men-2	0.000175109	0	0	0	0	0.000434	0	0	0	0	0	0	0.00296653	0.000187157	0	4.23538e-05	0.00978281	0.000132107	0	0	0.00100197	0.0021004	0.0191646	Allyl
CS77085	1	Mitterberg-2-184	0.000819807	0	0	0	0	0.000710498	0	0	5.80616e-05	0	0	0	0.000134145	0.000208352	0	4.13587e-05	0.00465685	0.0003578	0	0	0.00279845	0	0.0119414	Allyl
CS77085	2	Mitterberg-2-184	0.00282421	0.000210247	0	0	0	0.0028465	0	0	5.51764e-05	0	0	0	0.000747179	0.000166122	0.00138452	0	0.00606234	0.000394645	0	0	0.000397094	0	0.00750693	Allyl
CS77086	1	Mitterberg-2-185	0.00145951	0.000272585	0	0	0	0.00339062	0	0	4.39469e-05	0	0	0	0.00113151	0.000401614	0	2.82092e-05	0.0075237	0.000222515	0	0	0.00365846	0	0.0137344	Allyl
CS77086	2	Mitterberg-2-185	0.00142383	0	0	0	0	0.00301702	0	0	4.29717e-05	0	0	0	0.000489972	0.000490056	0	0	0.00727785	0.000239176	0	0	0.00330043	0	0.0117478	Allyl
CS77088	2	Mitterberg-3-187	0.00185189	0	0	0	0	0.00250199	0	7.00477e-05	0	0	0	0	0.00118209	0.00027124	0	0	0.00606712	0.000313505	0	0	0.00315872	0	0.0119034	Allyl
CS77088	1	Mitterberg-3-187	0.00132179	0	0	0	0	0.00127819	0	0	5.61334e-05	0	0	0	0.000140793	0.00012243	0	5.62525e-05	0.00572566	0.000400746	0	0	0.00334325	0	0.0152943	Allyl
CS77089	2	Mitterberg-3-188	0.0014397	0	0	0	0	0.00370969	0	7.62623e-05	0	0	0	0	0.000284539	0.000145772	4.51109e-05	0	0.00598523	0.000217538	0	0	0.0027526	0	0.0159698	Allyl
CS77089	1	Mitterberg-3-188	0.00112059	0	0	0	0	0.00196139	0	0	0	0	0	0	0.000308694	0.000142818	0	0.000162928	0.00528421	0.000137227	0	0	0.0032052	0	0.01503	Allyl
CS77090	1	Mitterberg-3-189	0.00139794	0	7.61379e-05	0	0	0.00174305	0	0	4.21372e-05	0	0	0	0.000264026	0.000222276	0	0.000131486	0.00574415	0.000311424	0	0	0.0030962	0	0.0132871	Allyl
CS77090	2	Mitterberg-3-189	0.00157607	0	0	6.65015e-05	0	0.00143196	0	0	0.000102382	0	0	0	0.000138611	0.000136239	0	0	0.00698404	0.00031236	0	0	0.00281232	0	0.0134401	Allyl
CS77093	1	Mitterberg-4-192	0.000898208	0	0	0	0	0.00097835	0	0	0	0	0	0	4.58867e-05	0.000127044	0	0.000101095	0.00439964	0.000253578	0	0	0.000525278	0	0.00796694	Allyl
CS77093	2	Mitterberg-4-192	0.0017825	0	0	0	0	0.0026224	0	0	0	0	0	0	0.000259183	0.000370577	0.000868176	0.000355639	0.00390477	0.000429198	0	0	0.000826704	0	0.00752387	Allyl
CS77094	2	Mitterberg-4-193	0.0023197	0.00044801	0	0	0	0.00216847	0	0	0	0	0	0	0.00143477	0.000336952	0.000968427	0.00010129	0.00542522	0.000341708	0	0	0.00209971	0.00283638	0.00841349	Allyl
CS77094	1	Mitterberg-4-193	0.000968622	0	0	0	0	0.00112064	0	0	4.59506e-05	0	0	0	0.000130652	0.000452932	0	0.000123311	0.00881536	0.000464302	0	0	0.00108612	0.00439353	0.0184194	Allyl
CS77095	2	Mitterberg-4-194	0.00197168	0	0	7.91752e-05	0	0.00314406	0	0	4.59426e-05	0	0	0	0.000114911	0.000419771	6.54878e-05	0	0.00810995	0.000146795	0	0	0.000851138	0	0.00756386	Allyl
CS77095	1	Mitterberg-4-194	0.001825	0.0011478	0	0	0	0.0022757	0	0	0	0	0	0	0.00111916	0.000340692	0	0.000285299	0.00539448	0.000195769	0.0002014	0	0.00504405	0	0.0121795	Allyl
CS77102	1	IP-Moa-0	0.000801964	0	0	0	0	0.002395	0	0	8.71886e-05	0	0	0	5.46738e-05	0.000132194	0	4.74931e-05	0.00651663	0.00033171	0	0	0.00397098	0	0.0153387	Allyl
CS77103	1	IP-Moc-11	0.000693786	0	0	0	0	0.00111979	0	0	0	0	0	3.35955e-05	5.15713e-05	0.000190302	0	0	0.00593694	0.000134503	0	0	0.00115983	0.00251628	0.0112684	Allyl
CS77103	2	IP-Moc-11	0.00165737	0.000208385	0	0	0	0.00487108	0	0.00017321	0	0	0	6.66579e-05	0.00038767	0.000431112	0.000692613	0	0.0108308	0.000512511	0	0	0.000881662	0	0.010057	Allyl
CS77104	1	IP-Moe-0	0	0	0.000972613	0.00288978	0	0	0	0.000449248	0.000733054	0	0	0.000172317	0	0.00135953	0	0.00124093	0.00999107	0.000463243	8.87881e-05	9.57677e-06	0.00100687	0.00323118	0.0125735	OH-But
CS77104	2	IP-Moe-0	0	0	0	0.0053301	0	0	0	0.000879174	0.000897957	0	0	0.000182246	0	0.000918432	0.000420457	0.00318676	0.00562752	0.000230622	0	0	0.00222565	0	0.0100374	OH-But
CS77105	2	IP-Moj-0	0	0	0	0.000891997	0	0.000391976	0	0.00244967	0	0	0	4.2512e-05	0	0.000658324	0.000223649	0.00228362	0.00738733	0.000120649	0	0	0.00159882	0	0.0111629	OH-But
CS77105	1	IP-Moj-0	0	0	0.000382957	0.000144239	0	0.000231081	0	0.00143108	0	0	0	7.11487e-05	0	0.000981202	0	0.000880218	0.0142152	0	0.000162438	0	0.000262527	0.00431988	0.013374	OH-But
CS77107	1	IP-Mon-5	0.000113082	0	0.00202194	0.00279139	0	0	0	0.000857671	7.19188e-05	0	0	0.000265042	0	0.00107199	0.000380059	0.000266092	0.0119451	0.000337119	0	0	0.00351376	0	0.0112258	OH-But
CS77107	2	IP-Mon-5	0	0	0	0.00524677	0	0.000354412	0	0.000681887	0.000202401	0	0	0	0	0.000674999	0.000169544	0.000196919	0.00520132	0.000198068	0	0	0.00368972	0	0.00892641	OH-But
CS77108	1	IP-Mos-1	0.000124052	0	0.000435242	0.00104711	0	0.000241221	0	0.000205366	7.20571e-05	7.87199e-05	0	0	0	0.00102358	0	0.00172451	0.0119519	0.000247738	0.000254409	0	0.00157436	0.00505231	0.0135358	OH-But
CS77108	2	IP-Mos-1	0	0	0	0.0016738	0	0.000370366	0	0.000225147	4.37881e-05	0	0	0	0	0.000628571	9.94545e-05	0.00170145	0.0069853	0.000177775	0.00023261	0	0.00210879	0	0.0055027	OH-But
CS77109	2	IP-Mot-0	0.000109026	0	0.00121383	0	0	0	0	0.00250002	7.54635e-05	0	0	0	0	0.000353293	0	0.000652099	0.00329631	0.000245273	0.000179165	0	0.00163244	0	0.00717897	Butenyl
CS77109	1	IP-Mot-0	0	0	0.00109352	0	0	0	0	0.0024617	0	7.54688e-05	0	0	7.2757e-05	0.000507071	0.000356422	0.00138508	0.00631514	0.000298187	0.000310773	0	0.00103846	0.00281188	0.00714276	Butenyl
CS77113	2	Muh-2	0.00388195	0	0	0	0	0	0	0	0	0	0	0	8.30903e-05	0.00013733	0	0	0.00204895	0.000282317	0	0	0.00471371	0	0.00904323	3OHP
CS77113	1	Muh-2	0.00721618	0	0	0	0	0	0	0	0	0	0	0	0.000882915	0.000135512	0	0.000187184	0.00308476	0.000259316	0	0	0.00544305	0	0.0116751	3OHP
CS77114	1	IP-Mun-0	0.00058666	0	0	0	0	0.0011054	0	0	4.80572e-05	0	0	0	7.64934e-05	0.000421344	0	0	0.00731056	0.000634184	0	0	0.00136035	0.00224885	0.00862523	Allyl
CS77119	1	Nar-3	0.00676501	0	0.000257508	0	0	0	0	0	0	0	0	0	0.00140073	9.11839e-05	0	0.000160615	0.0013698	0.000493364	0	0	0.00929678	0	0.00550698	3OHP
CS77121	1	Nar-5	0.00574041	0	0.000127457	0	0	0	0	0	0	0	0	0	0.0010822	0.000122294	0	0.000153595	0.00211345	0.000203887	0	1.17416e-05	0.0086327	0	0.0108716	3OHP
CS77121	2	Nar-5	0.015119	0	0.000240796	0	0.000139801	0	0	0	0	0	0	0	0.000944184	0.000145437	0.00136739	9.74863e-05	0.00169452	0.000196294	0	0	0.00613123	0	0.00482421	3OHP
CS77122	1	N??s 2	0.00080848	0	0	0	0	0.000853162	0	0	4.70828e-05	0	0	0	0.000198559	0.000439711	0	2.76886e-05	0.00970738	0.000550343	0	0	0.00149157	0.00304524	0.0117416	Allyl
CS77125	2	IP-Ndc-0	0.000323645	0	0	0.00258553	0	0	0	0.00187511	0	0	0	3.27653e-05	8.11427e-05	0.000405175	0	0.000986009	0.00461046	0.000215866	0.000187516	0	0.00328139	0	0.0110075	OH-But
CS77125	1	IP-Ndc-0	0	0	0.00156098	0.00110288	0	0	0	0.00206369	0	8.77918e-05	0	0	8.00578e-05	0.000687638	0.000427366	0.00119436	0.0075594	0.000206494	0.000277029	0	0.00280243	0	0.0174271	OH-But
CS77126	2	NFA-10	7.1128e-05	0	0	0.00313222	0	0	0	0	0.00039868	0	0	0	0	0.000385756	4.25465e-05	0.00109937	0.00332002	0.000125033	0	0	0.000863891	0	0.00927706	OH-But
CS77126	1	NFA-10	0.000154598	0	0.00106442	0.00190005	0	0	0	0	0.000367201	0	0	0	0	0.000306164	3.79372e-05	0.00248261	0.003245	6.28401e-05	7.54186e-05	7.622e-06	0.00265823	0	0.0110659	OH-But
CS77127	2	Nicas-1	8.02054e-05	0	0	0.00525825	0	0	0	0.000535815	0.00010906	0	0	0	0.00130877	0.000237725	0.000109896	0.00331552	0.00235081	0.000249486	0.000402339	0	0.00401436	0	0.0126592	OH-But
CS77127	1	Nicas-1	0.000155343	0	0.00307314	0.00418641	0	0	0	0.000670411	8.74718e-05	0	0	0	0.00191434	0.000275124	0.000164767	0.0043769	0.00246147	0.000266468	0.000272813	0	0.00452115	0	0.0118716	OH-But
CS77128	1	No-0	0.00731337	0	0	0	0	0	0	0	0	0	0	0	0.00138599	0.000144318	0	0.000155302	0.00279242	0.000203382	0	0	0.00465719	0	0.0093382	3OHP
CS77128	2	No-0	0.00287629	0.000131128	0	0	0	0	0	0	0	0	0	0	0.00121374	9.99906e-05	0	7.4299e-05	0.000936645	7.88638e-05	0.000246995	0	0.0013273	0	0.00309425	3OHP
CS77129	2	IP-Nog-17	0.0022517	0	0	0	0	0.00369526	0	0	0.000157349	0	0	0	0.000201953	0.000428362	0.000452615	0	0.00529262	0.000456909	0	0	0.000498582	0	0.00665874	Allyl
CS77129	1	IP-Nog-17	0.000474354	0	0	0	0	0.00160425	0	0	0.000130842	0	0	0	0	0.000145198	0	0	0.0047312	0.000418212	0	0	0.00250043	0	0.011512	Allyl
CS77134	1	NOZ-6	0	0	0.00145742	0.00219089	0	0	0	0	0.000110704	0	0	4.95888e-05	0	0.000437104	0	0.00063512	0.00460471	0.000684769	0.000186698	0	0.00287431	0	0.0153685	OH-But
CS77134	2	NOZ-6	0	0	0	0.00521452	0	0	0	0.000104251	0.000138992	0	0	0	0	0.000315889	6.40671e-05	0.000766082	0.00276726	0.000807507	0.000154011	0	0.00121796	0	0.00750136	OH-But
CS77136	1	Nyl-2	0.000592202	0	0	0	0	0.00158664	0	0	7.0282e-05	0	0	0	5.66988e-05	0.000444779	0	0	0.0129575	0.000395744	0	0	0.00157134	0.00310228	0.0138289	Allyl
CS77140	2	Obh-13	0.00333562	0	0	0	0	0.0022843	0	0	0	0	0	0	0.00024341	7.43145e-05	0.000854076	0	0.00359686	0.000329068	0	0	0.00337305	0	0.00689256	Allyl
CS77140	1	Obh-13	0.00210408	0.000212139	0	0	0	0.0037076	0	0	0	0	0	0	0.00201324	0.000109445	0	0.000786406	0.00528341	0.000253282	0	0	0.00476928	0	0.0148802	Allyl
CS77143	2	IP-Oja-0	0.000194145	0	0	0.00507628	0	0	0	0.000460533	0.000101658	0	0	9.81798e-05	0	0.000390635	0	0.00188929	0.00275223	0.000250945	0.000422885	0	0.00335329	0	0.00595369	OH-But
CS77143	1	IP-Oja-0	0.000182566	0	0.00288848	0.00326128	0	0	0	0.000420452	0.000128614	0	0	8.03107e-05	0	0.000440318	0.000293401	0.00264139	0.00389253	0.00033337	0.000498811	0	0.00339546	0	0.00984728	OH-But
CS77144	2	Olympia-2	0.000150694	0	0	0.00446983	0	0	0	0.000226666	0	0	0	0	0.000612817	0.000221409	0	0.00158309	0.00280916	0.000298935	0.000169068	0	0.00303462	0	0.00605819	OH-But
CS77144	1	Olympia-2	0.000151786	0	0.00296802	0.00329852	0	0	0	0.00073338	0	0	0	0	0.00106579	0.00021367	9.22081e-05	0.00320944	0.00351394	0.000337709	0	0	0.00380811	0	0.0104888	OH-But
CS77145	2	Omn-1	0.00157216	0	0	0	0	0.00110433	0	0	0	0	0	0	0.000380353	0.000386101	0.000976577	0	0.00688332	0.00033277	0	0	0.000487277	0	0.00743873	Allyl
CS77145	1	Omn-1	0.00076359	0	0	0	0	0.000970211	0	0	6.18326e-05	0	0	0	0.000154301	0.000148461	0	0	0.00672169	0.000251217	0	0	0.0020164	0.00336227	0.0129932	Allyl
CS77146	1	Omn-5	0.00094361	0	0	0	0	0.00166602	0	0	7.34155e-05	0	0	0	0.000466275	0.000156518	0	0	0.00686006	0.000563313	0	0	0.00181556	0.00371281	0.0152153	Allyl
CS77146	2	Omn-5	0.00378617	0	0	0	0	0.0029697	0	0	0	0	0	0	0.000596769	0.000259654	0.00127132	0	0.00493318	0.000526294	0	0	0.00260875	0.00262517	0.00923787	Allyl
CS77151	1	Orast-1	0.00056231	0	0	0.000150041	0	0.00106397	0	0	0	0	0	0	0.000352964	0.000322338	0	6.85132e-05	0.00610149	0.000312579	0	0	0.00187913	0.00368786	0.0119568	Allyl
CS77151	2	Orast-1	0.00250602	0.000279218	0	0	0	0.00454837	0	0	0	0	0	0	0.00136108	0.000333066	0.00163102	0	0.00487817	0.000323318	0	0	0.000546113	0	0.0054123	Allyl
CS77152	2	IP-Orb-10	0.000310992	0	0	0.00350526	0	0.000510038	0	0.000293873	0	0	0	3.07435e-05	0	0.000496024	0.000152499	0.000646264	0.00440091	0.000109594	0	0	0.00359938	0	0.00940251	OH-But
CS77152	1	IP-Orb-10	0.000120644	0	0.000879922	0.0011904	0	0.000288138	0	0.000137172	0	0	0	4.75929e-05	0	0.000480493	0	0.000429196	0.00578907	0.000316351	8.44718e-05	0	0.0029085	0	0.0145536	OH-But
CS77154	1	Ost-0	0.000408892	0	0	0	0	0.000758478	0	0	0.00014249	0	0	0	0	0.000258975	0	0	0.00888024	0.000820037	0	0	0.00113969	0.00328354	0.0153363	Allyl
CS77155	1	IP-Ovi-1	0.000182569	0	0.00186559	0.00249816	0	0	0	0.000137813	0.000102071	0	1.90584e-05	0	0	0.000461794	0.00015708	0.00319095	0.00306224	0.000287641	0.000464414	0	0.00453349	0	0.0105203	OH-But
CS77155	2	IP-Ovi-1	9.75101e-05	0	0	0.0035016	0	0	0	0.000198592	0.000171591	0	0	2.57052e-05	0	0.000334798	0.000119242	0.00417475	0.00285879	0.000153994	0.000536427	0	0.0035041	0	0.00672577	OH-But
CS77156	1	Oy-0	0.00098602	0.000317993	0	0	0	0	0	0	0	0	0	0	0.00861268	0.000122937	0	0.000173992	0.00249365	0.000496258	0	0	0.00211043	0	0.00761765	3MSO
CS77156	2	Oy-0	0.00119593	0.000248053	0	0	0	0	0	0	0	0	0	0	0.00602745	0.000140263	0.000874384	0.000194882	0.00286897	0.000533403	0	0	0.000830747	0	0.00557879	3MSO
cs77158	2	IP-Pad-0	0.00145035	0	0	0	0	0.00328909	0	9.07744e-05	7.00677e-05	0	0	7.07062e-05	0.000173756	0.00061915	0.000676935	8.43882e-05	0.010633	0.000119576	0	0	0.000927842	0.00122058	0.00605623	Allyl
CS77159	2	IP-Pal-0	0.000750867	0	0	0.00239399	0	0.00127413	0	0.00153587	0.000242601	0	0	0.000220897	0	0.00221917	0	0.00109994	0.00799469	0	0	0	0.000884985	0.00480454	0.00481678	OH-But
CS77159	1	IP-Pal-0	0.000536376	0	0	0	0	0.00137944	0	0	0.000185959	0	1.25986e-05	0	7.31227e-05	0.000331883	0	0	0.013633	0.000372901	7.37797e-05	0	0.000548711	0.0028229	0.0189705	OH-But
CS77161	2	Panik-1	0.00150631	0	0	0	0	0.00326597	0	0	0	0	0	0	0.000149235	0.000168868	0	0	0.00278768	0.00026626	0	0	0.00257715	0	0.00898221	Allyl
CS77161	1	Panik-1	0.00146949	0	8.4809e-05	0	0	0.00219819	0	0	0	0	0	0	0.000155806	0.000137833	0	0	0.00368717	0.000180762	0	0	0.00389586	0	0.0105963	Allyl
CS77163	2	Parti-1	0.00136178	0	0	0	0	0.00320486	0	7.25937e-05	0	0	0	0	6.61217e-05	0.000185228	0	0	0.00336533	0.000323679	0	0	0.00293444	0	0.00702513	Allyl
CS77163	1	Parti-1	0.000880327	0	0	0	0	0.00135801	0	0	0	0	0	0	0	0.000196046	0	0	0.0048343	0.000390589	0	0	0.00363333	0	0.00942617	Allyl
CS77166	1	IP-Pds-1	0.00012971	0	0.000736394	0.000985719	0	0	0	8.49329e-05	8.03802e-05	0	0	0	3.61707e-05	0.00030128	0	0.000951014	0.00767787	0.000662604	0.000213121	0	0.00193249	0	0.0181085	OH-But
CS77166	2	IP-Pds-1	0.000285222	0	0	0.00373925	0	0	0	0.000198752	0	0	0	4.31632e-05	0.000145045	0.000430589	0	0.00188524	0.00751701	0.000683838	0.000233453	0	0.00101057	0	0.010973	OH-But
CS77167	1	IP-Pee-0	0.000450828	0	0	0	0	0.000917766	0	0	9.0046e-05	0	0	0	6.64967e-05	0.000185796	0	0	0.00508848	0.000394781	0	0	0.00159246	0.00243552	0.0118421	Allyl
CS77169	1	IP-Per-0	0.000231068	0	0.000240454	0.00051941	0	0.00135979	0	0.000193612	4.61646e-05	0	0	0	0	0.000379399	0	0.000448217	0.00877502	0.000218887	0	0	0.00113172	0	0.00913994	OH-But
CS77169	2	IP-Per-0	0.000679011	0	0	0.00166177	0	0.00189836	0	0.000600959	7.19438e-05	0	0	0	7.28396e-05	0.000574043	9.767e-05	0.00174113	0.00957719	0.000152949	0	0	0.00218785	0	0.00811368	OH-But
CS77170	2	Petergof	0.00222468	0	0	0	0	0	0	0	0	0	0	0	0.000125952	0.000107625	0.00121546	0.000143435	0.00186251	8.16499e-05	0	0	0.00372229	0	0.00658512	3OHP
CS77170	1	Petergof	0.00207267	0	0	0	0	0	0	0	0	0	0	0	0.000565366	7.48417e-05	0	0.000233879	0.00249578	0.0001921	0	0	0.006151	0	0.0151094	3OHP
CS77171	2	Pfn-10	0.00223408	0.000221489	0	0	0	0.00420223	0	0	0	0	0	0	0.00134428	0.000224642	0.000962433	0	0.00387527	0.00017911	0	0	0.00304492	0	0.00528051	Allyl
CS77171	1	Pfn-10	0.00239925	0.00015528	0.000106009	0	0	0.00271413	0	0	0	0	0	0	0.00115743	0.000225374	0	0	0.00509497	8.60689e-05	0	0	0.00424217	0	0.00885844	Allyl
CS77172	2	Pfn-N2.2-6	0.00490654	0	0	0	0	0.00062358	0	0	7.79083e-05	0	0	0	0.000490404	0.00011477	0.00113141	0	0.00381279	0.000199164	0	0	0.00382581	0	0.00929701	3OHP
CS77172	1	Pfn-N2.2-6	0.00187797	0	0	0	0	0.000717088	0	0	0	4.90914e-05	0	0	0.000721957	0.000228479	0	0	0.00531852	0.000372509	0	0	0.00502314	0	0.018118	3OHP
CS77173	2	PHW-2	0	0	0	0.00657897	0	0	0	0.000156129	0.000203961	0	0	4.81144e-05	0	0.000680362	0.000254931	0.000901705	0.00521956	0.000343307	0.000245382	0	0.00400112	0	0.0117651	OH-But
CS77173	1	PHW-2	0	0	0.0014105	0.00190604	0	0	0	7.45521e-05	0.000157744	0	0	6.39062e-05	0	0.000738048	0	0.000893268	0.00678888	0.000451946	0.000251999	0	0.00337829	0	0.0106193	OH-But
CS77174	1	PHW-34	0.00251084	0	0	0	0	0	0	0	0	0	0	0	0.000233213	0.000127961	0	0.000118851	0.00402785	0	0	0	0.00482258	0	0.0149564	3OHP
CS77174	2	PHW-34	0.00897613	6.82345e-05	0	0	0	0	0	0	0	0	0	0	0.000372295	0.000301828	0	0	0.00403227	0.000244269	0	0	0.00770256	0	0.010808	3OHP
CS77175	1	IP-Pib-1	0.000685073	0	0	0	0	0.00118686	0	0	0.000154043	0	0	0	5.8401e-05	0.000117974	0	0	0.00441148	0.000404461	0	0	0.000814689	0	0.0127114	Allyl
CS77176	2	IP-Pie-0	0.00136257	0	0	0	0	0.00435407	0	0	9.54682e-05	0	0	0	7.38891e-05	0.000772747	0.000799038	0	0.0106187	0.00063863	0	0	0.00122755	0	0.0112628	Allyl
CS77176	1	IP-Pie-0	0.000839778	0	0	0	0	0.00123171	0	0	0.000111221	0	0	0	4.86713e-05	0.000534729	0	7.27059e-05	0.0120889	0.000299387	0	0	0.000543493	0	0.0119641	Allyl
CS77177	2	Pigna-1	0	0	0	0.00821009	0	0	0	0	0.000283982	0	0	0	0	0.000459652	0	0.00066928	0.00467282	0.000471396	0.000155922	0	0.0030136	0	0.0120742	OH-But
CS77178	2	IP-Pil-0	0.000783662	0	0	5.59249e-05	0	0.00141348	0	0	3.98326e-05	0	0	0	0.000780314	0.000188102	0	0	0.00541162	0.00017968	0	0	0.00219723	0	0.0122642	Allyl
CS77178	1	IP-Pil-0	0.000466701	0	0	0	0	0.000832345	0	0	5.21516e-05	0	0	0	0.000889163	0.000111739	0	0.000100109	0.00612258	0.000211771	0	0	0.00116992	0.00261458	0.0130759	Allyl
CS77179	2	IP-Piq-0	0.000491199	0	0	0.00391363	0	0.00110095	0	0.000494302	0	0	0	0	4.83302e-05	0.000275769	9.00889e-05	0.000677101	0.00410495	0.000177041	0	0	0.00445199	0	0.0140066	OH-But
CS77179	1	IP-Piq-0	0.000852442	0	0.00112806	0.00158172	0	0.000835092	0	0.000154123	0	0	0	0	0.00067398	0.000185111	0	0.00149988	0.00363718	0.00012029	0	0	0.00466002	0	0.0102336	OH-But
CS77181	1	PLY-20	0.000178593	0	0.00356799	0.00393898	0	0	0	0.00021858	0.000180993	0	0	8.20388e-05	0	0.000682062	0.00031542	0.00353358	0.00626426	0.000286059	0.000639941	0	0.00534365	0	0.0137162	OH-But
CS77181	2	PLY-20	0	0	0	0.00418171	0	0	0	0.000163206	0.00023803	0	0	0.000112959	0	0.000740168	0.000358943	0.000767653	0.00559201	0.000260736	0.000263058	0	0.00312487	0	0.0115427	OH-But
CS77182	1	Pn-0	0.00182236	0	0	0	0	0	0	0	0	0	0	0	0.000113481	0.00012238	0	0.000166996	0.00321046	0.000227549	0	0	0.00398199	0	0.00900805	3OHP
CS77182	2	Pn-0	0.00492099	0	0	0	0	0	0	0	0	0	0	0	0.000123273	7.08936e-05	0.000475436	6.24005e-05	0.00117637	0.000129907	0	0	0.0017767	0	0.00242789	3OHP
CS77187	1	Podvi-1	8.23629e-05	0	0.00120959	0.00290454	0	0	0	0.000194356	0.00023217	0	0	0	0	0.000480085	0	0.00096334	0.00642327	0.000623189	0	0	0.00259416	0	0.00988161	OH-But
CS77187	2	Podvi-1	0.000190304	0	0	0.00745441	0	0	0	0.000209841	0.000190193	0	0	6.19904e-05	0	0.000377933	0	0.00228484	0.00481354	0.000685151	0.000156135	0	0.00301749	0	0.00884867	OH-But
cs77189	2	IP-Prd-0	0.00096058	0	0	0	0	0.000989943	0	0	9.80262e-05	0	0	0	6.43428e-05	0.000406478	0.000266754	0	0.0101286	0.000474348	0	0	0.000596269	0.00192333	0.0122569	3OHP
CS77190	2	IP-Pru-0	0.00101911	0	0	0	0	0.0033721	0	0	0.000110361	0	0	0	3.8197e-05	0.000205939	0	0	0.0058024	0.000167134	0	0	0.0020888	0	0.0142915	Allyl
CS77190	1	IP-Pru-0	0.00150031	0	0	0	0	0.00223328	0	0	6.54752e-05	0	0	0	0.000203268	0.000359813	0	0	0.00815704	4.20789e-05	5.7435e-05	0	0.00161793	0.00130198	0.0091925	Allyl
CS77192	1	Pu2-8	0.00139041	0.000288232	0	0	0	0.000928378	0	0	0	0	0	0	0.00197282	0.000193707	0	0.00018977	0.00427035	5.87053e-05	0	0	0.00413689	0	0.0123603	Allyl
CS77192	2	Pu2-8	0.0015784	0	0	7.13752e-05	0	0.00100418	0	0	0	0	0	0	0.000660089	0.000136681	0	0	0.00325971	0.000173215	0	0	0.00375022	0	0.0101574	Allyl
CS77194	1	Puk-1	0.00100428	0	0	0	0	0.00370103	0	0	0	0	0	0	0.000286456	0.000133421	0	0.000108909	0.00591179	0.000495424	0	0	0.00315619	0.00321094	0.0118135	Allyl
CS77194	2	Puk-1	0.00146685	0	0	0	0	0.00600269	0	0	0	0	0	0	0.000228885	0.00037443	0.000741252	0	0.00480653	0.000525356	0	0	0.000587148	0	0.00631134	Allyl
CS77195	1	Puk-2	0.00117624	0	0	0	0	0.00447141	0	0	0	0	0	0	0.000188936	0.000112995	0	0.000109828	0.00471311	0.0003782	0	0	0.00376516	0	0.0108187	Allyl
CS77195	2	Puk-2	0.00195721	0	0	0	0	0.00671833	0	0	0	0	0	0	0.000535403	0.000386973	0.000900652	0	0.00578402	0.000529902	0	0	0.000460477	0	0.00547506	Allyl
CS77196	1	IP-Pun-0	0.000395126	0	0	0	0	0.00136441	0	0	0	0	0	4.39639e-05	0	0.00039433	0	0	0.0100013	0.000525513	0	0	0.000839071	0	0.0146668	Allyl
CS77196	2	IP-Pun-0	0.000611979	0	0	0	0	0.00195903	0	0	0	0	0	4.65748e-05	0	0.000411688	0.00056485	8.64671e-05	0.00819405	0.000421022	0	0	0.000916847	0.00231809	0.0109858	Allyl
CS77197	2	IP-Pva-1	0.00114367	0	0	0	0	0.00140456	0	0	0	0	0	0	0.000214478	0.000358395	0.000665129	0	0.00791111	0.000477723	0	0	0.00177806	0.00212657	0.00957548	Allyl
CS77197	1	IP-Pva-1	0.000410995	0	0	0	0	0.000975432	0	0	0	0	0	0	8.01125e-05	0.000303928	0	0	0.00963953	0.000319582	0	0	0.00280085	0	0.0129633	Allyl
CS77198	2	PYL-6	0.00168365	0	0	0	0	0.00351341	0	0	5.63801e-05	0	0	0	0.000796458	0.000144257	0	0	0.0049411	0.000222994	0	0	0.00406842	0	0.00926763	Allyl
CS77198	1	PYL-6	0.00167875	0.000102225	0	0	0	0.00168562	0	0	0	0	0	0	0.00284205	0.000232859	0	0.000111051	0.00561179	0.000293712	0	0	0.00335864	0	0.0104098	Allyl
CS77200	2	RAD-21	8.93311e-05	0	0	0.00564875	0	0	0	0.000211504	0.000301432	0	0	3.53955e-05	0	0.000326779	0.00022175	0.00145571	0.00226657	0.000281918	0.000514892	0	0.00482191	0	0.00644687	OH-But
CS77200	1	RAD-21	0.000134636	0	0.00255537	0.0035746	0	0	0	0.000186751	0.000153394	0	0	0.000119132	0	0.000589189	0.000229003	0.00397011	0.00473532	0.000423178	0.000721608	0	0.00562901	0	0.0106147	OH-But
CS77201	1	Rak-2	0.00146554	0.000169852	0	0	0	0	0	0	0	0	0	0	0.00248523	9.83025e-05	0	0.00013592	0.00207795	0.000185264	0	0	0.00414363	0	0.00742463	3MSO
CS77201	2	Rak-2	0.00195994	9.12299e-05	0	0	0	0	0	0	0	0	0	0	0.00153645	0.000185733	0	0	0.00317231	0.000464165	0	0	0.00613885	0	0.0135403	3MSO
CS77206	2	IP-Rds-0	0	0	0	0.00289187	0	0	0	0	4.78737e-05	0	0	0	0	0.000182578	0	0.00179783	0.00329786	0.000171843	0	0	0.0022008	0	0.0102331	OH-But
CS77206	1	IP-Rds-0	0.00011011	0	0.000564419	0.00152597	0	0	0	0	7.55542e-05	0	0	0	0	0.000305701	0	0.00145069	0.00484709	0.000281146	0.000100622	0	0.00201395	0	0.0165326	OH-But
CS77207	1	IP-Reg-0	0	0	0.00113192	0.00148384	0	0	0	0.000366388	8.96065e-05	0	0	7.53132e-05	0.000123808	0.000681881	0.000252219	0.00097478	0.00583326	0.000267849	0.000283517	0	0.00254929	0	0.0130703	OH-But
CS77207	2	IP-Reg-0	0	0	0	0.00296057	0	0	0	0.000468653	8.34115e-05	0	0	0.000104004	0.000120477	0.000829413	0.000270998	0.000935865	0.00709129	0.000132685	0.000172747	0	0	0	0.0214788	OH-But
CS77208	1	IP-Rei-0	6.69191e-05	0	0.0023958	0.00411872	0	0	0	0.000772112	0.000196667	0	0	0.000227482	0	0.00147607	0.000475341	0.00279494	0.0102865	0.000229164	0.000666676	0	0.00163496	0.00524677	0.0124633	OH-But
CS77208	2	IP-Rei-0	0	0	0	0.00676601	0	0	0	0.000703054	0.000118065	0	0	0.000144664	0	0.000928533	0.000323789	0.00377248	0.00576281	0.000196194	0.000750951	0	0.00424275	0	0.0084234	OH-But
cs77209	2	IP-Rel-0	0.000220876	0	0	0.00112617	0	0.00029235	0	0.000408872	0	0	0	7.41726e-05	0	0.000378954	0	0.000498146	0.00516369	0.000454312	6.32557e-05	0	0.000607612	0.0030933	0.00832438	OH-But
CS77210	1	Rennes-1	0	0	0.000784152	0.00177542	0	0	0	0	0.000143579	0	0	0	3.7574e-05	0.000208156	0	0.00270885	0.00331914	0.000347916	0.000312677	0	0.00240857	0	0.0125536	OH-But
CS77210	2	Rennes-1	0	0	0	0.0022219	0	0	0	0	0.00027277	0	0	0	0	0.000143907	0	0.000903824	0.0022131	0.000170897	0.000223115	0	0.00237289	0	0.00843567	OH-But
CS77211	1	Rennes-11	0	0	0.00186245	0.00173829	0	0	0	0	9.95491e-05	0	0	0	0	0.000211108	0	0.000738342	0.00254671	0.000223141	0.000222391	0	0.00352355	0	0.0109769	OH-But
CS77211	2	Rennes-11	0	0	0	0.00328989	0	0	0	0	0.000162762	0	0	0	0	0.000193919	0	0.00028137	0.00170764	0.000195027	0.000174712	0	0.00328006	0	0.0119844	OH-But
CS77213	1	IP-Rev-0	0.000387667	0	0	0	0	0.000768824	0	0	0.000133407	0	0	0.000115605	0	0.000596981	0	0	0.0214807	0	0	0	0.000446461	0.00187978	0.01244	Allyl
CS77215	1	Rev-2	0.000746973	0	0	0	0	0.000455946	0	0	0.000110178	0	0	0	6.42849e-05	0.000181299	0	0	0.0046929	0.000420038	0	0	0.00237788	0.00332621	0.0123073	Allyl
CS77216	1	IP-Ria-0	0.00082215	0	0	0	0	0.0013458	0	0	0.000167044	0	0	4.04939e-05	0	0.000406226	0	0	0.00801574	0.000681613	0	0	0.00112106	0.00287343	0.0141544	Allyl
CS77217	1	IP-Rib-1	0.000656754	0	0	7.75047e-05	0	0.0010093	0	0	5.02292e-05	0	0	0	9.7477e-05	0.000296833	0	2.61191e-05	0.00654548	0.000428201	0	0	0.001585	0.00208989	0.0122026	Allyl
CS77217	2	IP-Rib-1	0.00164528	0	0	0	0	0.00206001	0	0	6.71211e-05	0	0	0	0.000186444	0.000249583	0.0010888	0	0.00564473	0.000387407	0	0	0.00294568	0	0.00920229	Allyl
CS77222	1	Rsch-4	0.00404602	0	0	0	0	0	0	0	0	0	0	0	0.00198833	0.000103933	0	0.000291353	0.00319186	8.14854e-05	0	1.65649e-05	0.00475711	0	0.0106347	3OHP
CS77222	2	Rsch-4	0.00373791	0	0	0	0	0	0	0	0	0	0	0	0.00142393	9.49836e-05	0	0	0.00332866	2.04934e-05	0	0	0.00538211	0	0.0103617	3OHP
CS77223	1	Ru-2	0.0012393	0	0	0	0	0.00125125	0	0	0	0	0	0	0.000206629	0.000182096	0	0	0.0061896	0.000278697	0	0	0.00402017	0	0.0126368	Allyl
CS77223	2	Ru-2	0.000849721	0	0	0	0	0.000995302	0	0	0	0	0	0	7.66428e-05	0.000149286	0	0	0.00340235	0.000143354	0	0	0.00293262	0	0.00867794	Allyl
CS77225	1	Ru4-16	0.00177306	0.000111576	0	0	0	0.00215378	0	0	0	0	0	0	0.000446704	0.000163684	0	0.000861678	0.00408804	6.51412e-05	0	0	0.004271	0	0.00938933	Allyl
CS77225	2	Ru4-16	0.00137197	0	0	0	0	0.0020605	0	0	0	0	0	0	8.38313e-05	0.000130317	0	0	0.00330646	5.6988e-05	0	0	0.00396375	0	0.00810916	Allyl
CS77226	2	RUM-20	0	0	0	0.00606099	0	0.000394884	0	0.000789407	0	0	0	0	0	0.000274682	0.000129088	0.00414932	0.00241117	0.000400558	0.000265639	0	0.00321567	0	0.00745395	OH-But
CS77226	1	RUM-20	9.68665e-05	0	0.0019641	0.00239787	0	0	0	0.000409572	0	0	0	3.19553e-05	0	0.000336012	0.000110509	0.00366478	0.00311243	0.00033755	0.000293803	0	0.00268391	0	0.00985048	OH-But
CS77229	1	IP-Sac-0	0.000927737	0	0	0	0	0.00120474	0	0	0	0	0	0	0.00053848	0.000181233	0	0	0.0036981	0.000173289	0	0	0.00172625	0	0.00848315	Allyl
CS77229	2	IP-Sac-0	0.00172975	0	0	0	0	0.0026592	0	0	8.61522e-05	0	0	0	0.000314611	0.000218641	0	0	0.00483853	0.000276516	0	0	0.00314237	0	0.0128164	Allyl
CS77230	2	IP-Sal-0	0	0	0	0.00276617	0	0	0	7.68009e-05	0.000604338	0	0	0	0	0.000730131	0	0.00124909	0.00575998	0.000210821	0	0	0.00214219	0	0.0115644	OH-But
CS77230	1	IP-Sal-0	0	0	0.000624158	0.00137377	0	0	0	0	0.000397098	0	0	0	0	0.000510101	0	0.000678531	0.00916264	0	0	0	0.00188195	0	0.013124	OH-But
CS77231	2	IP-Sam-0	0.0018925	0	0	9.65766e-05	0	0.00258396	0	0	3.83101e-05	0	0	0	0.000423458	0.000208516	0	0.000819202	0.00803042	8.91997e-05	0	0	0.00322464	0	0.0126487	Allyl
CS77231	1	IP-Sam-0	0.000822181	0	0	0	0	0.00110904	0	0	4.31244e-05	0	0	0	0.000149789	0.000235402	0	3.59634e-05	0.00669866	0	0	0	0.00246988	0	0.0102699	Allyl
CS77232	1	IP-San-10	0.0001075	0	0.000375336	0.000497551	0	0.000303326	0	0.000359073	0	0	0	0.000147248	0	0.0009194	0	0	0.0110072	0.000748656	0	0	0.00102124	0	0.00601776	OH-But
CS77232	2	IP-San-10	0.000342339	0	0	0.00181597	0	0.000428497	0	0.00077427	0	0	0	0.000146959	0	0.000752837	0.000289473	7.78582e-05	0.00641682	0.000443313	0	0	0.00123444	0	0.00545085	OH-But
CS77233	1	San-2	0.000115966	0	0.000773274	0	7.191e-05	0	0	0	0	0	0	5.64405e-05	0	0.00053876	0	0.00298741	0.00487965	0.000322974	0.000313972	0	0.00129229	0	0.00821321	4MSO
CS77233	2	San-2	0.000341399	0	0.00171993	0	0.000623279	0	0	0	0	0	0	9.12236e-05	0	0.000634046	0	0.00584526	0.00430427	0.000380276	0.000449016	0	0.00121448	0	0.00643968	4MSO
CS77234	1	Sanna-2	0.000756565	0	0	0	0	0.000905743	0	0	0.000175722	0	0	0	7.83872e-05	0.000305997	0	0.000288659	0.0107047	0.000877432	0	0	0.00181892	0.0033996	0.0164027	Allyl
CS77236	2	Sarno-1	0	0	0	0.00422576	0	0	0	7.93183e-05	7.27044e-05	0	0	2.88218e-05	0	0.000374027	0	0.00144787	0.00388601	0.000133036	0.000232548	0	0.00318169	0	0.0088765	OH-But
CS77236	1	Sarno-1	0	0	0.00193237	0.00236508	0	0	0	9.09736e-05	7.15897e-05	0	0	6.16147e-05	0	0.000391305	0.000135978	0.00138919	0.00388661	0.000220076	0.000192397	0	0.00217407	0	0.0094196	OH-But
CS77237	2	SAUL-24	0.000397452	0	0	0.00358732	0	0.00074496	0	0.000430264	0.000263126	0	0	0	0	0.000297318	8.86417e-05	0.00280938	0.00321546	0.000816449	0	0	0.00279645	0	0.0116181	OH-But
CS77237	1	SAUL-24	0.000211983	0	0.00068883	0.00190677	0	0.0005319	0	0.000230541	0.000181219	0	0	0	0	0.000299625	0	0.00270302	0.00341362	0.000415459	5.35865e-05	0	0.0014506	0.00383297	0.0100202	OH-But
CS77239	1	Schip-1	0.00114657	0	0	0.000116996	0	0.0014788	0	0	0	0	0	0	0.000237201	0.00022222	0	6.63111e-05	0.004776	0.000457082	0	0	0.00326332	0	0.0112906	Allyl
CS77239	2	Schip-1	0.00109858	0	0	0.00013326	0	0.00207487	0	0	0	0	0	0	0.000125272	0.000104834	0	0	0.00345781	0.000395917	0	0	0.00231702	0	0.00720387	Allyl
CS77240	2	Schl-7	0.000750981	0	0	0	0	0.00153356	0	0	0	0	0	0	4.50184e-05	0.000165782	0	0	0.00365465	0.000224118	0	0	0.00284977	0	0.011316	Allyl
CS77240	1	Schl-7	0.00146468	0.000257034	0.000744148	0	0	0.00130714	0	0	0	0	0	0	0.00155572	0.000323096	0	0.0033899	0.00438374	0.000380266	0	0	0.00441175	0	0.00928297	Allyl
CS77243	1	IP-Sen-0	0.0011355	0	0	0	0	0.00301736	0	0	6.73235e-05	0	0	0	0.00034113	0.000270293	0	6.54349e-05	0.0050689	0.000309948	0	0	0.003451	0	0.00741547	Allyl
CS77243	2	IP-Sen-0	0.00177999	0	0	0	0	0.00308299	0	0	0	0	0	0	0.000256874	0.000190386	0.00117152	0.00013832	0.00303011	0.000378249	0	0	0.000476208	0	0.00548751	Allyl
CS77244	1	IP-Ses-0	0.00048313	0	0	0	0	0.00104724	0	0	0	0	0	0	8.71418e-05	5.95021e-05	0	0	0.00215381	0.000190165	0	0	0.000789578	0.00100568	0.0051069	Allyl
CS77244	2	IP-Ses-0	0.00227188	0	0	0	0	0.00784346	0	0	0	0	0	0	0.000448098	0.000160308	0.00125481	0.000173768	0.00284899	0.000190787	0	0	0.000648441	0	0.00602599	Allyl
CS77246	1	Sf-1	0	0	0.00060407	0.00120266	0	0	0	0	0.000319466	0	0	0	0.000774198	0.000380891	0	0.00451548	0.00279208	0.000147356	0.000125629	0	0.000910446	0.00292173	0.0117663	OH-But
CS77247	1	Sf-2	0.000155064	0	9.64612e-05	0	0.000206303	0	0	0	0.000149605	0	0	0	0.00179911	0.000225449	0	0.00840014	0.00316943	9.38045e-05	0.00014841	0	0.000903314	0	0.00710858	4MSO
CS77247	2	Sf-2	0.000398807	0	0.000267053	0	0.000407722	0	0	0	0.00022975	0	0	0	0.00180774	0.000328011	0	0.0110062	0.00529547	0.000129169	0.000300214	0	0.00154731	0	0.00972211	4MSO
cs77248	2	IP-Sfb-6	0.000115445	0	0	0.00390414	0	0	0	0.000138454	0.000641916	0	0	0	0	0.00044416	0	0.00186088	0.00509397	0.000121839	2.63343e-05	0	0	0.00653176	0.00798026	OH-But
CS77251	1	Sku-30	0.00108904	0	0	0	0	0.00218678	0	0	5.01976e-05	0	0	0	0.000105949	6.88796e-05	0	3.88067e-05	0.00405636	0.000235887	0	0	0.00376717	0	0.00847927	Allyl
CS77252	1	Slavi-2	0.001356	0	0.000356014	0.000351475	0	0.00324277	0	0	0	0	0	0	7.18717e-05	0.000165314	0	4.8398e-05	0.00326543	0.000293267	0	0	0.00356114	0	0.00862288	Allyl
CS77252	2	Slavi-2	0.00144329	0	0	0.000583477	0	0.00361066	0	0	0	0	0	0	0.000106345	0.000141556	0	0	0.00323467	0.000312425	0	0	0.00250834	0	0.00630691	Allyl
CS77256	1	Smolj-1	0.000342106	0	0.00124107	0.00177388	0	0.000905699	0	9.92518e-05	0	0	0	3.80747e-05	0.000104068	0.000191869	0	0	0.00720654	0.000332771	0	0	0.00278762	0	0.0114697	OH-But
CS77256	2	Smolj-1	0	0	0	0.00467814	0	0	6.10771e-05	0.000184339	0	0	0	0	0	0.000332571	5.87752e-05	0.00403414	0.00370421	0.000127858	0.000251439	0	0.00247517	0	0.0108921	OH-But
CS77257	1	IP-Smt-1	0.000260487	0	0.00132321	0.00250977	0	0.000839763	0	0.000227197	0.000126063	0	0	4.369e-05	4.99334e-05	0.000629473	0	0.00123495	0.00685109	0.000509437	0	0	0.00255642	0	0.0110093	OH-But
CS77257	2	IP-Smt-1	0.000677782	0	0	0.00328401	0	0.000650709	0	0.000263207	8.93913e-05	0	0	0	5.83726e-05	0.000393345	4.60265e-05	0.00190774	0.00468844	0.000233507	0	0	0.00310592	0	0.0104788	OH-But
CS77258	1	IP-Sne-0	0.000813274	0	0	0	0	0.00180609	0	0	0	0	0	0	0	0.000487144	0	7.53212e-05	0.00531914	0.000964394	0	0	0.00214985	0.00433085	0.00960847	Allyl
CS77259	1	IP-Som-0	0.000968709	0	0	0	0	0.000521783	0	0	8.91751e-05	0	0	0	0.00012827	0.00044146	0	6.9742e-05	0.0111317	0.000230184	0	0	0.00219283	0	0.0128635	Allyl
CS77263	1	Spro 1	0.000722219	0	0	0	0	0.00050761	0	0	8.06413e-05	0	0	0	0.000317723	0.000145844	0	0	0.00582444	0.000241171	0	0	0.00300806	0	0.0106192	Allyl
CS77263	2	Spro 1	0	0	0	0	0	0	0	0	0	0	0	0	0	0	0	0	0.000302655	1.47888e-05	0	0	0.000245311	0	0.000495899	Allyl
CS77265	1	Spro 3	0.000345851	0	0	0	0	0.000211687	0	0	0	0	0	3.46727e-05	0.000185446	0.000316938	0	0	0.00845069	0.000347791	0	0	0.00138343	0.00347796	0.013638	Allyl
CS77266	2	Sq-1	0	0	0	0.00439853	0	0	0	0	0.000281109	0	0	0	0	0.000352674	0	0.000279573	0.00338642	0.000272461	0.000150669	0	0.0022964	0	0.00726865	OH-But
CS77266	1	Sq-1	0	0	0.00190622	0.00267333	0	0	0	0.000205797	0.000151761	0	0	8.47099e-05	0	0.000443341	0.000195772	0.00181753	0.00446778	0.000364706	0.000335446	0	0.00317451	0	0.0123676	OH-But
CS77267	1	Sr:3	0.000596381	0	0	0	0	0.00105368	0	0	0	0	0	0	5.36301e-05	0.00038292	0	0	0.00778659	0.000641846	0	0	0.00202464	0.00361842	0.0138473	Allyl
CS77268	1	Sr:5	0.00145592	0	0	0	0	0	0	0	0	0	0	0	0.000277327	0.000120835	0	0.000141101	0.0025741	0.00019714	0	0	0.00291268	0	0.00931494	3OHP
CS77268	2	Sr:5	0.00159706	0	0	0	0	0	0	0	0	0	0	0	5.87856e-05	0.000124972	0	0	0.00238194	0.000216807	0	0	0.00323034	0	0.0128621	3OHP
CS77269	1	Sredn-1	0.000511079	0	0	0	0	0.00223407	0	0	0	0	0	0	5.38286e-05	6.92185e-05	0	7.48127e-05	0.00331644	0.000256536	0	0	0.00204264	0.00321564	0.0118907	Allyl
CS77270	1	St-0	0.00159972	0	0	0	0	0	0	0	0	0	0	0	0.000598783	0.000122125	0	0.000189968	0.00304914	0.000257463	0	0	0.00380648	0	0.0116782	3OHP
CS77270	2	St-0	0.00125474	0	0	0	0	0	0	0	0	0	0	0	5.6651e-05	0.000109476	0	0	0.00221889	0.00017851	0	0	0.00286451	0	0.00752818	3OHP
CS77271	2	Stara-1	0.00118026	0	0	7.42409e-05	0	0.00160186	0	0	0	0	0	0	0.00093057	0.000138566	0	0	0.00229184	0.000230626	0	0	0.00229514	0	0.00803169	Allyl
CS77271	1	Stara-1	0.00146276	0.000250805	0.000107482	0.00014158	0	0.00236404	0	0	0	0	0	0	0.00240847	0.000156303	0	0.000587241	0.00340571	0.000268179	0	0	0.00175012	0.00162713	0.00624658	Allyl
CS77272	1	Staro-1	0	0	0	0	0	0	0	0	0	0	0	0	0	0	0	0	0	0	0	0	0	0	0	OH-But
CS77272	2	Staro-1	0.000307733	0	0	0.00106793	0	0.000456351	0	9.22101e-05	0	0	0	0	0.00011209	8.44897e-05	0.00050536	0	0.00156228	0.000296488	0	0	0.00145605	0	0.00383892	OH-But
CS77273	2	Staro-2	0.00220667	0	0	0.000321146	0	0.00874334	0	0	0	0	0	0	0.000134986	0.000246999	0.000884365	0	0.00374162	0.000311754	0	0	0.00198298	0.00186972	0.00481994	Allyl
CS77273	1	Staro-2	0.00103998	0	9.31541e-05	0	0	0.00387757	0	0	0	0	0	0	0	0.000248499	0	0	0.00407433	0.000244737	0	0	0.000850826	0	0.00869339	Allyl
CS77274	1	Stenk-2	0.00115936	0	0	0	0	0.00151459	0	0	0.000119544	0	0	0	0.000102973	0.000311723	0	0	0.00964953	0.000239716	0	0	0.00150475	0	0.0184468	Allyl
CS77276	1	Stenk-4	0.000947761	0	0	0	0	0.00246546	0	0	0	0	0	0	8.89608e-05	0.000157427	0	0	0.00446402	0.00031323	0	0	0.00342731	0	0.0132919	Allyl
CS77279	2	Stiav-1	0.00219192	0	0.000133275	9.37217e-05	5.58117e-05	0.00211071	0	0	0	0	0	0	0.000367063	0.000262528	0	0	0.00452659	0.000225117	0	0	0.00405404	0	0.0119387	Allyl
CS77279	1	Stiav-1	0.00106967	0	0	0	0	0.00122548	0	0	0	0	0	0	0.000304976	0.000223102	0	6.88457e-05	0.00473993	0.00015339	0	0	0.00284045	0	0.0110572	Allyl
CS77280	2	Stiav-2	0.0021435	0	0	0	0	0.00174094	0	0	0	0	0	0	0.000200384	0.000219006	0.00131275	0	0.00436338	0.000592565	0	0	0.000404565	0	0.00702751	Allyl
CS77280	1	Stiav-2	0.000805026	0	0	0	0	0.000772311	0	0	0	0	0	0	5.64769e-05	0.000209691	0	0	0.00442454	0.000410687	0	0	0.00172064	0.00324746	0.0133971	Allyl
CS77281	1	Stiav-3	0.000653812	0	0	0	0	0.000433295	0	0	0	0	0	0	3.85017e-05	0.000247411	0	0	0.00546057	0.000380028	0	0	0.00184925	0	0.00874623	Allyl
CS77281	2	Stiav-3	0.00137006	0	0	0	0	0.00118558	0	0	0	0	0	0	8.69747e-05	0.000160135	0.000640302	0	0.0031989	0.000251108	0	0	0.00122479	0	0.00696788	Allyl
CS77283	2	IP-Stp-0	0.000712302	0	0	0	0	0.000383187	0	0	0	0	0	0	0	0.00025257	0.00105944	0	0.00394137	0.000239778	0	0	0.00111259	0.00201237	0.00835561	3OHP
CS77284	1	Strand-1	0.000853167	0	0	0	0	0.000777551	0	0	0	0	0	0	0.000106475	0.000160303	0	0	0.00782322	0	0	0	0.00246473	0	0.0101015	Allyl
CS77285	1	Stu1-1	0.000408048	0	0	0	0	0.000892824	0	0	0	0	0	0	4.72924e-05	0.000233964	0	4.50737e-05	0.00566416	0.000290679	0	0	0.000844088	0	0.0119004	Allyl
CS77287	1	IP-Svi-0	0.00262083	0.00042917	0	0	0	0.00118242	0	0	0	0	0	0	0.00369995	0.000201874	0	0.000218618	0.00246339	6.09498e-05	0	0	0.00499976	0	0.00760971	Allyl
CS77287	2	IP-Svi-0	0.00125122	0.000183195	0	0	0	0.000921018	0	0	0	0	0	0	0.00307039	6.54985e-05	0	0	0.00153749	0	0	0	0.003365	0	0.00564989	Allyl
CS77288	1	T1000	0.0003337	0	0	0	0	0.00013967	0	0	0.000108063	0	0	0	5.85113e-05	0.000441035	0	0	0.010733	0.000293848	0	0	0.00079676	0	0.0119785	Allyl
CS77289	2	T1020	0.00198403	0	0	0	0	0.00321499	0	8.68602e-05	6.94044e-05	0	0	0	0.000380464	0.000590251	0.00119373	0	0.0067755	0.000692555	0	0	0.000879022	0	0.00871705	Allyl
CS77289	1	T1020	0.000433472	0	0	0	0	0.000341429	0	0	7.82125e-05	0	0	0	0.000205054	0.000290262	0	0	0.0094405	0.0003672	0	0	0.000639205	0.00290805	0.0165095	Allyl
CS77290	1	T1040	0.00066034	0	0	0	0	0.0004589	0	0	0	0	0	0	6.87554e-05	8.24538e-05	0	5.48644e-05	0.00180284	0.000141091	0	0	0.00155784	0	0.00643372	Allyl
CS77291	1	T1070	0.000393378	0	0	0	0	0.000552003	0	0	0	0	0	0	0	0.0003002	0	0	0.00532089	0.000258476	0	0	0.00088919	0	0.00934533	Allyl
CS77294	1	T1110	0.000582528	0	0	0	0	0.000899648	0	0	0.000164587	0	0	0	0.000675985	0.000330819	0	0	0.00863791	0.000360665	0	0	0.00110371	0.00384138	0.0172407	Allyl
CS77296	2	T1160	0.000313515	0	0.00153033	0	0.000609428	0	5.49511e-05	0	0	0	0	9.72761e-05	6.86965e-05	0.000698005	0	0.0063551	0.00521991	0.000524726	0.000457597	0	0.000966083	0.00323512	0.00515925	4MSO
CS77296	1	T1160	0.00010619	0	0.00079756	0	0.00016863	0	5.24486e-05	0	0	0	0	0.000137522	4.12631e-05	0.000973256	0	0.00370663	0.00924511	0.000710284	0.000403786	0	0.00167486	0	0.0099365	4MSO
CS77297	1	T450	0.000543923	0	0	0	0	0.00178223	0	0	9.35685e-05	0	0	0	0.000794666	0.000184532	0	3.54485e-05	0.00413639	0.000352224	0	0	0.00159104	0.00274505	0.0102391	Allyl
CS77300	2	T480	0	0	0	0.00341762	0	0	0	0	0.000376011	0	0	9.97209e-05	0	0.000500659	0	0.000783735	0.00555044	0.000254542	0	0	0.00325273	0	0.0112738	OH-But
CS77301	1	T510	0.000555718	0	0	0	0	0.000572387	0	0	0	0	0	0	4.94186e-05	0.000197847	0	0	0.00545243	0.000233109	0	0	0.00204743	0	0.012884	Allyl
CS77305	1	T570	0.00084891	0	0	0	0	0.000711572	0	0	0	0	0	4.59263e-05	9.91568e-05	0.000629522	0	0	0.0130017	0.00029764	0	0	0.00416899	0	0.012145	Allyl
CS77306	2	T580	0.00185437	0	0	0	0	0.0019039	0	0	0	0	0	0	7.77945e-05	0.000129281	0.000698208	0	0.00278948	0.000280861	0	0	0.00178015	0.00138186	0.00299593	Allyl
CS77306	1	T580	0.00120566	0	9.30595e-05	0	0	0.00107678	0	0	0	0	0	0	6.91611e-05	0.000293681	0	0	0.00706346	0.000475263	0	0	0.00365327	0	0.0109829	Allyl
CS77307	1	T610	0.0001239	0	0.000683515	0	9.9188e-05	0	0	0	0	0	0	4.63453e-05	0	0.000302399	0	0.00316581	0.00388609	0.000432416	0.000344152	0	0.0032737	0	0.00915619	4MSO
CS77307	2	T610	0.000251128	0	0.00135577	0	0.00071032	0	0	0	0	0	0	0.000104537	0.000168452	0.000494702	0	0.00677269	0.00414273	0.000250886	0.000284259	0	0.000940479	0.00234343	0.00383327	4MSO
CS77308	1	T670	0.000100611	0	0.000611307	0	6.34056e-05	0	0	0	0	0	0	7.13301e-05	0	0.000478382	0	0.00205183	0.00621453	0.000271536	0.000238739	0	0.00131555	0	0.00972463	Butenyl
CS77310	1	T710	0.000107546	0	0.000613144	0	7.00125e-05	0	0	0	0	0	0	0	0	0.000243333	0	0.00223421	0.00322701	0.000206275	0.000281123	0	0.00317381	0	0.00910768	Butenyl
CS77311	1	T720	0.000368528	0	0	0	0	0.000216752	0	0	0	0	0	0	0.00017393	0.000108306	0	0	0.00253102	0.000296431	0	0	0.00243907	0	0.0111065	Allyl
CS77316	2	T790	0.00139728	0	0	0	0	0.0019987	0	0	4.58003e-05	0	0	0	0	9.09045e-05	0.000870193	0	0.00288787	0.000614633	0	0	0.000563093	0	0.00637106	Allyl
CS77316	1	T790	0.000507502	0	0	0	0	0.000656037	0	0	9.22046e-05	0	0	0	0	0.000219678	0	0	0.00523628	0.000726508	0	0	0.00142198	0.00284126	0.0105121	Allyl
CS77319	2	T840	0.000288523	0	0.00197331	0	0.000316051	0	0	0	0	0	0	5.90126e-05	0	0.000455929	0	0.00506591	0.00428458	0.0002404	0.000325712	0	0.00235266	0	0.00384591	4MSO
CS77319	1	T840	0.000107083	0	0.000724545	0	0.000153305	0	0	0	0	0	0	8.87366e-05	0	0.00072971	0	0.0026161	0.0089389	0	0.000280836	0	0.00360825	0	0.00754652	4MSO
CS77320	1	T850	9.40043e-05	0	0.000752167	0	0.00011571	0	0	0	0	0	0	4.48322e-05	0	0.000345909	0	0.00305173	0.0050308	0.000398316	0	0	0.00277417	0	0.0102501	Butenyl
CS77321	1	T860	0.000800673	0.00134123	0	0	0	0	0	0	0	0	0	0	0.00532914	0.000313046	0	4.26661e-05	0.0059503	3.47431e-05	0	0	0.00127064	0.00232363	0.00892901	3MSO
CS77321	2	T860	0.00146616	0.0013445	0	0	0	0	0	0	0	0	0	0	0.00822552	0.000199446	0.00113236	0	0.00350912	0.000379825	0	0	0.00183197	0.00122139	0.00410916	3MSO
CS77322	1	T880	9.29664e-05	0	0.000750267	0	9.79789e-05	0	0	0	0	0	0	3.99937e-05	0	0.000355846	0	0.00354706	0.00439615	0.000313525	0.000353014	0	0.00289896	0	0.00947753	Butenyl
CS77323	1	T900	0	0	0.000621646	0	7.52416e-05	0	0	0	0	0	0	0	0	0.000192184	0	0.00231527	0.00272241	0.000346229	0.000250533	0	0.00295899	0	0.00885217	4MSO
CS77323	2	T900	0.000141072	0	0.00208869	0	0.000311293	0	0	0	0	0	0	0	0	0.000183121	0	0.00439171	0.00192088	0.000415575	0.000368147	0	0.00221974	0	0.00336551	4MSO
CS77325	1	T960	0.000376856	0	0	0	0	0.000152258	0	0	0	0	0	0	0	0.000299225	0	0	0.00632575	0.000148431	0	0	0.00137693	0.00307578	0.011914	Allyl
CS77325	2	T960	0.00170176	0	0	0	0	0.00170858	0	0	0	0	0	0	0.000126801	0.000215132	0.00163025	0	0.00406733	0.00129746	0	0	0.000689747	0	0.00734461	Allyl
CS77326	1	T970	0.000467959	0.0018416	0	0	0	0	0	0	0	0	0	0	0.0049	0.000281368	0	5.05581e-05	0.00445564	0.000382968	0	0	0.00112502	0.00191062	0.00729049	3MSO
CS77326	2	T970	0.00153809	0.00485017	0	0	0.000142817	0	0	0	0	0	0	0	0.00797446	0.000353942	0.000905555	0	0.00507173	0.000469812	0	0	0.00109535	0	0.0059349	3MSO
CS77327	1	T980	0	0	0.000667023	0	0	0.000113295	0	0	0	0	0	0	0	0.000178707	0	0.00176651	0.00210335	0.000331587	0.000235593	0	0.00308312	0	0.00727186	4MSO
CS77327	2	T980	0.000211631	0	0.00272997	0	0.000415162	0	0	0	0	0	0	5.95555e-05	0	0.00031969	0	0.00510424	0.00279106	0.000717491	0.000425656	0	0.00277417	0	0.00501816	4MSO
CS77328	1	T990	0.000139088	0	0	0	0	0.000137071	0	0	0	0	0	0	0	0.000108941	0	0	0.00383278	0	0	0	0.000412579	0.000976921	0.00465172	Allyl
CS77330	1	TAA 04	0.00140881	0	0	0	0	0.00368554	0	0	0	0	0	0	0.000343027	0.000345989	0	3.91501e-05	0.0064206	0.000341102	0	0	0.00385146	0	0.0117921	Allyl
CS77335	1	T??D 04	0.00128728	0	0	0	0	0.00102579	0	0	5.5829e-05	0	0	0	0.000123373	0.000185741	0	4.71785e-05	0.00886246	0.000416181	0	0	0.00339372	0	0.0123423	Allyl
CS77337	1	T??D 06	0.000873209	0	0	0	0	0.000508002	0	0	9.39618e-05	0	0	0	4.90802e-05	0.000580445	0	0	0.0160869	0.00047289	0.000331041	0	0.00199295	0.00372131	0.0152023	Allyl
CS77339	1	T??L 07	0.00033296	0	0.000161491	0	0.000892924	0	6.65946e-05	0	0.000131993	0	0	7.92631e-05	0	0.000550966	0	0.0112984	0.00533007	0.000540252	0.000493369	0	0.00070759	0.00285641	0.00600133	4MSO
CS77339	2	T??L 07	0.000335065	0	0.000236286	0	0.000578126	0	0	0	0.000185097	0	0	6.67829e-05	0	0.000359316	0	0.00804515	0.00260998	0.000389535	0.000385506	0	0.000728439	0	0.00298966	4MSO
cs77341	2	Tamm-27	0.0016627	0	0	0	0	0.00559953	0	0	0	0	0	0	0.000348047	0.000156805	0.00223076	0.000144113	0.0027836	0.000912781	0	0	0.00325567	0	0.00437618	Allyl
CS77342	1	IP-Tau-0	0.00104485	0	0	0	0	0.00201373	0	0	0	0	0	0	9.3513e-05	0.000215729	0	7.87998e-05	0.00676568	0.000411037	0	0	0.00247793	0	0.0147118	Allyl
CS77342	2	IP-Tau-0	0.000954832	0	0	0	0	0.00264463	0	0	3.49102e-05	0	0	0	0.000190553	0.000174109	0	0	0.0051629	0.000407459	0	0	0.00256694	0	0.0105558	Allyl
CS77344	1	IP-Tdc-0	0.000303777	0	0	0	0	0.000340196	0	0	0	0	0	0	6.71972e-05	0.000207709	0	0	0.00546508	0.000108789	0	0	0.00065171	0.00181026	0.0088686	Allyl
CS77348	2	TDr-16	0.00103	0	0	0.000119055	0	0.001327	0	0	0	0	0	0	0.000166982	0.00044615	0	0	0.00956647	0.000670672	0	0	0.00150344	0	0.0145126	Allyl
CS77348	1	TDr-16	0.000822007	0	0	0	0	0.0013005	0	0	0	0	0	0	8.51105e-05	0.000461504	0	0	0.00963033	0.000333451	0	0	0.000841742	0.00325238	0.0144868	Allyl
CS77349	1	TDr-17	0.000488862	0	0	0	0.000930982	0	0	0	6.67194e-05	0	0	0	4.61591e-05	0.00014628	0	0	0.00488932	0.000449563	0	0	0.0012646	0.00311013	0.0119922	Allyl
CS77349	2	TDr-17	0.00115745	0	0	0	0	0.00232934	0	0	0	0	0	0	0.000157923	0.000363306	0.000880338	0	0.00526554	0.000606326	0	0	0.000393267	0	0.00644492	Allyl
CS77350	2	TDr-18	0.00284005	0	0	0	0	0.00279049	0	0	0	0	0	0	0.000353339	0.000312793	0.00109105	0	0.00472847	0.000976351	0	0	0.00261362	0.00297537	0.00891413	Allyl
CS77351	1	TDr-2	0.00237981	0	0	0	0	0	0	0	0	0	0	0	0.000872998	0.000149644	0	0.000208715	0.00522982	0	0	0	0.00452948	0	0.0101865	3OHP
CS77351	2	TDr-2	0.00223765	0	0	0	0	0.00048738	0	0	0	0	0	0	9.07581e-05	0.000178813	0	0	0.00484838	8.29117e-05	0	0	0.00374602	0	0.00949224	3OHP
CS77352	1	TDr-4	0.00127469	0	0	0	0	0.00170916	0	0	0	0	0	0	0.000893579	0.00021352	0	4.02356e-05	0.00444478	0.000244781	0	0	0.00416748	0	0.00944518	Allyl
CS77352	2	TDr-4	0.00123925	0	0	0	0	0.00128321	0	0	0	0	0	0	0.000623826	0.000215626	0	0	0.00365868	0.000311096	0	0	0.00361026	0	0.00746637	Allyl
CS77353	2	TDr-5	0.00304231	0	0	0	0	0	0	0	0	0	0	0	0	0.000109354	0	0	0.00251979	0.000207832	0	0	0.00393022	0	0.0121455	3OHP
CS77353	1	TDr-5	0.0027457	0	0	0	0	0	0	0	0	0	0	0	0.000101025	0.000154712	0	0.000314665	0.00411685	0.000282399	0	0	0.00407221	0	0.0136657	3OHP
CS77354	2	TDr-7	0.0020861	0	0	0	0	0	0	0	0	0	0	0	0.000131014	0.000115968	0	0	0.00234211	0.000221858	0	0	0.00389566	0	0.00931181	3OHP
CS77354	1	TDr-7	0.00268891	0	0	0	0	0	0	0	0	0	0	0	0.00158142	0.000151363	0	0.000312042	0.00397038	0	0	0	0.00455924	0	0.0135691	3OHP
CS77355	1	TDr-8	0.000587213	0	0	0	0	0.000289908	0	0	0	0	0	0	0	0.0002271	0	0	0.00695808	0.00106379	0	0	0.00107721	0.00260454	0.0143335	Allyl
CS77355	2	TDr-8	0.00111743	0	0	6.59246e-05	0	0.00158802	0	0	0	0	0	0	0.000308674	0.000323127	0	0	0.0103671	0.00175631	0	0	0.00101169	0	0.0105234	Allyl
CS77357	1	Teano-1	0	0	0.00152909	0.0017166	0	0	0	0	0.00010954	0	0	3.8161e-05	5.31209e-05	0.000318574	0	0.000322223	0.0049922	0.000346454	8.44569e-05	0	0.00353109	0	0.0110295	OH-But
CS77357	2	Teano-1	0	0	0	0.00912226	0	0	0	0.00016478	0.000399901	0	0	7.9636e-05	9.92147e-05	0.000579258	0.000312196	0.000658641	0.00725471	0.000251102	0	0	0.00357522	0	0.00906485	OH-But
CS77358	1	TEDEN 02	0.00121594	0	0	0	0	0.00279161	0	0	6.88764e-05	0	0	0	4.47562e-05	0.000126061	0	0	0.00466804	0.000382613	0	0	0.00253763	0.00306592	0.012259	Allyl
CS77359	1	TEDEN 03	0.000827679	0	0	0	0	0.00210529	0	6.89265e-05	8.78197e-05	0	0	0	0	9.27564e-05	0	0	0.00517415	0.000606401	0	0	0.00233918	0.00318901	0.0118012	Allyl
CS77361	2	Teiu-2	0.00141768	0	0	8.68264e-05	0	0.00297504	0	0	0	0	0	0	0.000131587	0.000187497	0	0	0.0030637	0.000442541	0	0	0.00404953	0	0.00785252	Allyl
CS77361	1	Teiu-2	0.000981666	0	0	0	0	0.00186154	0	0	0	0	0	0	0.000105853	0.000290169	0	6.11709e-05	0.00405524	0.000470318	0	0	0.00381841	0	0.0110834	Allyl
CS77365	1	TGR 01	0.000772226	0	0	0	0	0.000417675	0	0	0.000100186	0	0	0	0	0.00041325	0	0	0.00884272	0.00105026	0	0	0.00125084	0	0.0129334	Allyl
CS77366	1	TGR 02	0.00109281	0	0	0	0	0.00168574	0	0	0.000144852	0	0	0	0	0.000278523	0	0	0.0084339	0.000716285	0	0	0.00233634	0.0033733	0.0128837	Allyl
CS77370	2	Toc-1	0.00112738	0.000125503	0	8.25689e-05	0	0.00146582	0	0	0	0	0	0	0.000967008	0.000198511	0	0	0.00385954	0.000237139	0	0	0.00192306	0	0.01007	Allyl
CS77370	1	Toc-1	0.000633587	0	0	0	0	0.00174308	0	0	0	0	0	0	0.000568598	0.00023008	0	6.06819e-05	0.00592271	0.000293762	0	0	0.00273732	0	0.0117253	Allyl
CS77371	1	IP-Tol-7	0.000582097	0	0	0	0	0.00206683	0	0	0.00012246	0	0	0	7.96246e-05	0.000263944	0	0	0.0113635	0.000152739	0	0	0.00108938	0.00266147	0.0151384	Allyl
CS77373	2	TOM 03	0.000810898	0	0	0	0	0.000880448	0	0	0	0	0	0	0.000320296	0.000134833	0.000488642	0	0.00319237	0.000369622	0	0	0.00122042	0	0.00444883	Allyl
CS77373	1	TOM 03	0.000432714	0	0	0	0	0.000836955	0	0	0	0	0	0	0.000114107	0.000307781	0	8.21102e-05	0.00809388	0.000372101	0	0	0.00196377	0.00270835	0.0103115	Allyl
CS77374	1	TOM 04	0.000509832	0	0	0	0	0.00158768	0	0	7.01763e-05	0	0	0	5.79721e-05	0.000428261	0	0	0.00831202	0.000635897	0	0	0.000969011	0	0.00776169	Allyl
CS77375	1	TOM 06	0.000791191	0	0	0	0	0.0018138	0	0	0	0	0	0	0.000613166	0.000371063	0	4.75914e-05	0.00556183	0.000430677	0	0	0.00403705	0	0.0089969	Allyl
CS77376	1	TOM 07	0.0013308	0	0	0	0	0.00145549	0	0	7.43275e-05	0	0	0	0.000225155	0.000392455	0	3.44382e-05	0.00898163	0.000344753	0	0	0.002195	0.00322276	0.0118934	Allyl
CS77377	1	Tomegap-2	0.00077749	0	0	0	0	0.00031113	0	0	0	0	0	3.41142e-05	0.000257351	0.000450989	0	5.5708e-05	0.0103035	0.000422545	0	0	0.0012488	0.00329806	0.0155023	Allyl
CS77378	2	IP-Tor-1	0.00116064	0	0	0	0	0.000945784	0	0	7.39559e-05	0	0	0	8.31109e-05	0.000124636	0.00112738	0	0.00666845	0.000554531	0	0	0.00151688	0.00212267	0.010215	Allyl
CS77378	1	IP-Tor-1	0.000684109	0	0	0	0	0.000458999	0	0	6.3554e-05	0	0	0	0.000118659	0.000166592	0	6.62311e-05	0.00966523	0.000519478	0	0	0.0022651	0	0.0135666	Allyl
CS77380	1	Tos-95-393	0.000896472	0.000191114	0	0	0	0.00166823	0	0	0	0	0	0	0.00074671	0.000297582	0	0	0.00481602	0.000316399	0	0	0.00295751	0	0.00883542	Allyl
CS77380	2	Tos-95-393	0.00156026	0	0	0	0	0.00675618	0	0	0	0	0	0	0.000366705	0.000411545	0	0	0.00562668	0.000391668	0	0	0.00307912	0	0.0101256	Allyl
CS77381	2	Tottarp-2	0.00490537	0	0	0	0	0	0	0	0	0	0	0	9.58474e-05	0.000177046	0	0	0.00365421	8.48999e-05	0	0	0.00478826	0	0.00896936	3OHP
CS77381	1	Tottarp-2	0.00605205	0	0	0	0	0	0	0	0	0	0	0	0.000427128	0.000186396	0	0.000201943	0.00464927	0.000276437	0	0	0.00479756	0	0.0121167	3OHP
CS77382	2	TOU-A1-88	0.000282591	0	0	0.00236562	0	0.000209261	0	7.25642e-05	5.58274e-05	0	0	0	0	0.000394152	0	0.00197394	0.00291069	0.000255164	0.000306746	0	0.00282613	0	0.00963023	OH-But
CS77382	1	TOU-A1-88	0.000212005	0	0.00124336	0.00203168	0	0	0	0	7.04199e-05	4.86828e-05	0	0	4.69594e-05	0.000442629	7.59558e-05	0.00396884	0.00410294	0.000303078	0.000338873	0	0.00315006	0	0.0126797	OH-But
CS77383	2	TOU-A1-89	0	0	0	0.00460508	0	0	0	0.000168763	0.00042724	0	0	0	0	0.000411845	0	0.0019161	0.00339407	0.000174572	0	0	0.00203941	0	0.00979091	OH-But
CS77383	1	TOU-A1-89	8.86393e-05	0	0.00124448	0.00207015	0	0	0	7.69637e-05	0.000327269	0	0	0	0	0.000490646	0	0.00274775	0.00334595	0.000221203	0	6.50652e-06	0.00209766	0	0.00750229	OH-But
CS77384	1	TR?? 01	0.000534121	0	0	0	0	0.000891681	0	0	0	0	0	0	0.000173056	5.98783e-05	0	0	0.0032668	0.000224575	0	0	0.00174855	0	0.00652238	Allyl
CS77385	1	TRE-1	0	0	0.00171015	0.00203507	0	0	0	0.000138286	0.000338713	0	2.70074e-05	0	0	0.000382761	0.000258541	0.000431843	0.0063091	0.000184127	0.000186108	0	0.00200571	0	0.0175246	OH-But
CS77385	2	TRE-1	0	0	0	0.00444742	0	0	0	0.000152281	0.000442425	0	0	2.73808e-05	0	0.000391177	0	0.000351925	0.0070082	0.000115793	0.000284711	0	0.00227371	0	0.0180227	OH-But
CS77386	2	IP-Tri-0	0.000356759	0	0	0.00110034	0.000112653	0.000231141	0	0.00481661	0	0	0	0	0.000160862	0.000250138	0	0.00451323	0.00360491	0.000136259	0.000430276	0	0.0024859	0	0.00699117	Butenyl
CS77386	1	IP-Tri-0	0.000113632	0	0.00139412	0	0.000245672	0	0	0.00582839	0	3.92449e-05	0	0	0.000252797	0.000307913	0.000272299	0.00541195	0.00376637	0.00019508	0.000275177	0	0.00246298	0	0.0091962	Butenyl
CS77387	1	IP-Trs-0	0.00010893	0	0.001996	0.00210946	0	0	0	0.000218629	8.09301e-05	0	0	0	0	0.000307272	0.000152307	0.00446031	0.0044122	0.000134499	0.000447158	0	0.00326726	0	0.0105306	OH-But
CS77387	2	IP-Trs-0	9.06308e-05	0	0	0.00364251	0	0	0	0.000248238	0.000138342	0	0	0	0	0.00021521	0.000119282	0.0043765	0.00324641	0.000122521	0.000428792	0	0.00283781	0	0.00676401	OH-But
CS77388	2	Ts-5	0.000139558	0	0	0.00238988	0	0	0	8.08269e-05	0.000342502	0	0	6.84115e-05	0	0.000442027	6.36904e-05	0.00111508	0.00539221	0.000140344	0	0	0.00135162	0	0.00811	OH-But
CS77388	1	Ts-5	0	0	0.000454354	0.00128983	0	0	0	9.64204e-05	0.00024128	0	0	0	0	0.000628555	0	0.00156298	0.00597743	0.000410382	4.67942e-05	0	0.000924118	0.0029656	0.0144257	OH-But
CS77391	1	Tu-B1-2	0.00496411	0	0	0	0	0	0	0	0	0	0	0	0.000206595	0.000175398	0	9.81359e-05	0.00442981	0.000208492	0	0	0.00619283	0	0.012096	3OHP
CS77391	2	Tu-B1-2	0.00208525	0	0	0	0	0.000111719	0	0	0	0	0	0	0	0.000134854	0	0	0.00273163	0.000199786	0	0	0.00443638	0	0.00828102	3OHP
CS77392	1	Tu-B2-3	0.00195199	0.000396417	0	0	0	0.00225242	0	0	0	0	0	0	0.00182823	0.000269581	0	0	0.00588353	0.000143038	0	0	0.00359873	0	0.0113329	Allyl
CS77393	1	Tu-KB-6	8.12836e-05	0	0.00164741	0.00194206	0	0	0	0	0.000118431	0	0	7.74543e-05	0	0.000488978	0.000111786	0.000803123	0.00261715	0.000231127	0.000268243	0	0.00247949	0	0.00514793	OH-But
CS77393	2	Tu-KB-6	0.000267275	0	0	0.00459773	0	0	0	0	0.00027361	0	0	3.68958e-05	0	0.000504004	0	0.00046837	0.00381187	0.000168972	0.000267275	0	0.00360573	0	0.00681281	OH-But
CS77394	1	Tu-KS-7	0.00246486	0.000132495	9.70046e-05	0	0	0.0019943	0	0	0	0	0	0	0.00145341	8.54048e-05	0	5.21156e-05	0.00325226	9.70072e-05	0	0	0.00353791	0	0.010398	Allyl
CS77394	2	Tu-KS-7	0.00145471	0	0	0.000141054	0	0.00225081	0	0	0	0	0	0	0.000103789	7.30447e-05	0	0	0.00206262	0.000113578	0	0	0.00328227	0	0.0128128	Allyl
CS77395	2	Tu-NK-12	0.00478966	0	0	0	0	0	0	0	0	0	0	0	0.000318947	0.000150786	0	0	0.00235456	0.000536911	0	0	0.00530101	0	0.00870985	3OHP
CS77395	1	Tu-NK-12	0.00478277	0	0	0	0	0	0	0	0	0	0	0	0.000350348	8.66219e-05	0	0.00015419	0.0015935	0.000214948	0	0	0.00262716	0	0.00597292	3OHP
CS77396	2	Tu-PK-7	0.00229689	0	0	6.03874e-05	0	0.00255992	0	0	0	0	0	0	0.000146893	0.000304816	0	0	0.00609806	0.000497686	0	0	0.00296458	0	0.0104358	Allyl
CS77396	1	Tu-PK-7	0.000715632	0	0	0	0	0.000781005	0	0	0	0	0	0	9.58308e-05	0.000211739	0	0	0.00594153	0.000396289	0	0	0.0014445	0.00269787	0.0129818	Allyl
CS77397	1	Tu-W1	0.00152002	0.00027663	0	0	0	0.00112485	0	0	0	0	0	0	0.00302955	0.000175793	0	0.000109382	0.0041782	1.25172e-05	0	0	0.00357609	0	0.0108467	Allyl
CS77397	2	Tu-W1	0.00165376	0	0	7.56005e-05	0	0.00100119	0	0	0	0	0	0	0.0007428	0.000141984	0	0	0.00306203	1.39599e-05	0	0	0.00423267	0	0.0143628	Allyl
CS77398	1	Tu-WH	0.0019086	0.000155694	0	0	0	0.000897401	0	0	0	0	0	0	0.00198634	0.000177955	0	0.000170947	0.00698761	1.47969e-05	0	0	0.00334337	0	0.0108252	Allyl
CS77398	2	Tu-WH	0.00145263	0	0	0	0	0.00119699	0	0	0	0	0	0	0.000526645	0.000122752	0	0	0.00476743	4.13252e-05	0	0	0.0031142	0	0.00927856	Allyl
CS77399	1	Tur-4	0.000676616	0	0	0.000119825	0	0.00141877	0	0	7.04916e-05	0	0	0	9.64912e-05	0.000404089	0	6.68586e-05	0.00982738	0.00064796	0	0	0.0013308	0.00274721	0.014377	Allyl
CS77636	1	Ale-Stenar-77-31	0.0002933	0	0	0	0	0.000104059	0	0	0.00016705	0	0	0	3.77853e-05	0.000136483	0	0	0.00578941	0.000191236	0	0	0.00159747	0	0.013078	Allyl
CS77643	2	Br??sarp-45-153	0.00204627	0.000499784	0	0	0	0.000153703	0	0	0	0	0	0	0.00282282	0.000320382	0	0	0.00349682	0.000313651	0	0	0.00362085	0	0.00872917	3MSO
CS77643	1	Br??sarp-45-153	0.00122951	0	9.50817e-05	5.59681e-05	0	0.00029	0	0	0	0	0	0	0.000105746	8.38287e-05	0	5.573e-05	0.00322175	0.000291571	0.000121658	0	0.00307254	0	0.0111745	3MSO
CS77651	1	Aledal-14-73	0.000614189	0	9.03814e-05	6.87327e-05	0	0.000504207	0	0	0	0	0	3.67063e-05	0.00028046	0.000316424	0	0.000146751	0.00828167	0.000222282	0	0	0.00081038	0	0.0155347	Allyl
CS77651	2	Aledal-14-73	0.00187491	0	0	0	0	0.00246698	0	0	0	0	0	6.5635e-05	0.000884635	0.000327857	0.00105823	0	0.00787867	0.000487359	0	0	0.000901645	0	0.0139991	Allyl
CS77906	2	Boo2-3	0.000365655	0	0.00215938	0	0.000273873	0	0	0	0	0	0	5.79703e-05	0	0.000385234	0	0.00477913	0.00270964	0.000280855	0.000324731	0	0.00259775	0	0.00303589	4MSO
CS77906	1	Boo2-3	0.000140576	0	0.000709239	0	0.000133291	0	0	0	0	0	0	4.47536e-05	0	0.000335892	0	0.00411084	0.00420155	0.000336261	0.000291997	0	0.00402263	0	0.00751324	4MSO
CS77913	1	Dra-3	0.000587096	0	0	0	0	0.000948145	0	0	0.000119172	0	0	0	6.79914e-05	0.000209251	0	0	0.00886679	0.000746156	0	0	0.00199106	0.00294262	0.0143372	Allyl
CS78000	1	Eden-5	0.000426414	0	0	0	0	0.00084854	0	0	0	0	0	0	0	4.71128e-05	0	0	0.00304282	0.000209517	0	0	0.00144579	0	0.00602515	Allyl
CS78009	2	Fj??2-6	0.00136592	0	0	0	0	0.00159119	0	0	0	0	0	0	0.000551595	0.000431731	0.000753906	0	0.00530499	0.000617351	0	0	0.00184659	0.00177919	0.00505107	Allyl
CS78009	1	Fj??2-6	0.000676287	0	0	0	0	0.00137204	0	0	4.36475e-05	0	0	0	0.000298453	0.000465199	0	0	0.00719897	0.000646812	0	0	0.00224032	0	0.014065	Allyl
CS78030	1	Rev-3	0.00010676	0	0.0011115	0	0.000157856	0	0	0	0	0	0	7.80624e-05	0	0.000641698	0	0.00397343	0.00580227	0.000354981	0.000443808	0	0.00288445	0	0.011027	4MSO
CS78035	1	T1010	9.80348e-05	0	0.000484222	0	0.00010689	0	0	0	0	0	0	4.1852e-05	0	0.00031626	0	0.00305804	0.00404198	0.000359498	0.000286944	0	0.00257686	0	0.0085945	4MSO
CS78035	2	T1010	0.00034784	0	0.00195414	0	0.000368075	0	0	0	0	0	0	6.95104e-05	0	0.00049084	0	0.00496236	0.0047244	0.000483499	0.000423818	0	0.00115416	0	0.00356949	4MSO
CS78039	1	T1050	0.000678655	0	0	0	0	0.000562897	0	0	8.166e-05	0	0	0	4.38681e-05	0.000536288	0	0	0.0111575	0	0	0	0.000735944	0	0.0116652	Allyl
CS78039	2	T1050	0.000570137	0	0	5.723e-05	0	0.00100926	0	0	0.000126855	0	0	0	5.70687e-05	0.000273283	0	0	0.00837711	0.000377765	0	0	0.00124168	0	0.0122958	Allyl
CS78040	1	T1060	0.000458902	0	0	0	0	0.000324628	0	0	5.19793e-05	0	0	0	0	9.11368e-05	0	0	0.00479977	0.000210631	0	0	0.00175135	0	0.0112202	Allyl
CS78064	1	T680	0.000803692	0	0	0	0	0.000950185	0	0	7.0974e-05	0	0	0	0.000347744	0.000376332	0	0	0.00721386	0.000299023	0	0	0.00252317	0	0.0157579	Allyl
CS78079	1	T890	0.000600595	0	0	0	0	0.000675902	0	0	0	0	0	0	0	0.000393732	0	0	0.00883344	0.000204112	0	0	0.000805448	0	0.00822221	Allyl
CS78552	1	Ull2-13	0.00135985	0.000199496	0	0	0	0.00111743	0	0	0	0	0	0	0.0012384	0.000180689	0	0	0.00608313	0.000155807	0	0	0.00348698	0	0.00941932	Allyl
CS78552	2	Ull2-13	0.00167977	0	0	0.000165818	0	0.00181386	0	0	0	0	0	0	0.000472144	0.000166379	0	0	0.00463804	0.000312596	0	0	0.00367804	0	0.00889867	Allyl
CS78767	1	TV-10	0.00070252	0	0	0	0	0.000213193	0	0	0	0	0	0	0	0.000265184	0	0	0.00416939	0.000335263	0	0	0.00248374	0	0.0114926	Allyl
CS78768	1	TV-22	0.000448511	0	0	0	0	0.00178108	0	0	0.000121344	0	0	0	6.30372e-05	0.000358159	0	0	0.00913285	0.00151441	0	0	0.00175718	0.00389256	0.0157655	Allyl
CS78769	1	TV-30	0.000429692	0	0	0	0	0.00113542	0	0	9.18304e-05	0	0	0	0.000198679	0.000190973	0	0	0.00665185	0.000651166	0	0	0.00183008	0	0.0142959	Allyl
CS78770	1	TV-38	0.000320602	0	0	0	0	0	0	0	0	0	0	0	0	0.00015973	0	0	0.00295032	0.000263467	0	0	0.00185888	0	0.0118254	Allyl
CS78774	2	UduI 1-11	0.00369626	9.22245e-05	0	0	0	0	0	6.29469e-05	0	0	0	0	0.000852632	0.000207375	0	0	0.00351197	4.91955e-05	0	0	0.00372967	0	0.0104894	3OHP
CS78774	1	UduI 1-11	0.00385612	0.000216398	0	0	0	0	0	0	0	0	0	0	0.00249962	0.000219314	0	0.000126422	0.00541929	2.75901e-05	0	0	0.00368324	0	0.00896255	3OHP
CS78775	2	UduI 3-36	0.00453209	0	0	0	0	0	0	0	0	0	0	0	0.000143307	0.000206012	0	0	0.00339134	0.000314808	0	0	0.00370707	0	0.00827501	3OHP
CS78776	1	UduI 4-9	0.00215094	0	0	0	0	0	0	0	0	0	0	0	0.000110594	0.000102017	0	9.39703e-05	0.00198724	0.000143951	0	0	0.00549052	0	0.00983486	3OHP
CS78776	2	UduI 4-9	0.00364856	0	0	0	0	0	0	0	0	0	0	0	9.4386e-05	0.000147899	0	0	0.00290321	8.83583e-05	0	0	0.0063171	0	0.00932103	3OHP
CS78777	1	Uk-3	0.000161069	0	0.00226404	0	0.000102044	0	0	0	0	0	0	8.28188e-05	0	0.000424749	0	0.00365831	0.00379946	0.000329456	0.000462772	0	0.00394461	0	0.00823571	4MSO
CS78777	2	Uk-3	0.000289465	0	0.00179931	0	0.0001963	0	0	0	0	0	0	0	0	0.000307681	0	0.00233739	0.00229206	0.00019063	0.000329821	0	0.00301197	0	0.00515334	4MSO
CS78781	1	Cal-2	0.000310397	0	0.00063313	0.00093373	0	0.000563178	0	0.000999761	0.000316427	8.75218e-05	0	0	4.11236e-05	0.000921653	0.000289334	0.00225281	0.00584828	0.000197675	0	9.47565e-06	0.00139976	0.00449201	0.0117729	OH-But
CS78782	1	Cnt-1	0	0	0.0016907	0.00289629	0	0	0	0.000153305	0.000747747	0	0	0	0	0.000371795	0.000183248	0.00158202	0.00454788	0.000297128	5.03247e-05	1.04612e-05	0.00247289	0	0.0132856	OH-But
CS78782	2	Cnt-1	0	0	0	0.00483182	0	0	0	5.62598e-05	0.00065587	0	0	0	0	0.000306115	0.000139811	0.000939081	0.0037312	0.000329906	6.42771e-05	0	0.00243839	0	0.0108346	OH-But
CS78783	2	For-2	0.000562738	0	0	0.00417689	0	0.00107957	0	0.000768306	0.000518948	0	0	0	0.000122499	0.000794672	0	0.00192648	0.00624381	0.000602835	0	0	0.00127823	0.0065214	0.0115048	OH-But
CS78783	1	For-2	0.00015985	0	0.000725941	0.00118495	0	0.000569195	0	0.000287228	0.000369806	0	0	0	0	0.000331601	0	0.000948332	0.00346717	0.000319194	0	0	0.0020585	0	0.00970072	OH-But
CS78784	2	Kil-0	0.00237559	0	0	9.00662e-05	0	0.00140492	0	0	0	0	0	0	0.000309797	0.000221991	0	0	0.00579469	4.95313e-05	0	0	0.00523081	0	0.0161119	Allyl
CS78784	1	Kil-0	0.00188076	0	8.62234e-05	0	0	0.00199218	0	0	0	0	0	0	0.00062364	0.000299975	0	0	0.00815579	8.17209e-05	0	0	0.00457907	0	0.012644	Allyl
CS78785	2	Mc-1	0.00185397	0.000434697	0	0	0	0	0	0	0	0	0	0	0.00779316	0.000155412	0	0	0.00270436	0.000542976	0	0	0.00113626	0	0.00695544	3MSO
CS78785	1	Mc-1	0.000975008	0.000959111	0	0	0	0	0	0	0	0	0	0	0.0127127	0.000205674	0	0.000241783	0.00371779	0	0	0	0.00105445	0.00204065	0.00848116	3MSO
CS78786	2	UKID63	0.00118112	0	0	0.00011148	0	0.00356062	0	0	0	0	0	0	7.52757e-05	0.000184706	0	0	0.00423005	0.000568509	0	0	0.00270548	0	0.0109468	Allyl
CS78786	1	UKID63	0.00065588	0	0	0	0	0.00131196	0	0	0	0	0	0	0	5.51344e-05	0	5.02545e-05	0.00260132	0.000287628	0	0	0.00159261	0.00192716	0.00825659	Allyl
CS78787	2	Set-1	0.000663686	0	0.000740024	0	0	0	0	0	0	0	0	0	0	0.000161897	0	0	0.00227941	0.000234015	0	0	0.00326662	0	0.00931982	4OHB
CS78787	1	Set-1	0.000653359	0	0.000699361	0	0	0	0	0	0	0	0	0	0	0.0001986	0	0.000895172	0.00308507	0.000258548	0	0	0.00319949	0	0.00824116	4OHB
CS78789	1	UKID74	6.62983e-05	0	0.00166981	0.00232572	0	0	0	8.45792e-05	0.00021223	0	0	0.00013572	0	0.00087181	0	0.000560684	0.00521688	0.000471431	0.00029148	0	0.00171015	0.00340983	0.00490891	OH-But
CS78789	2	UKID74	0	0	0	0.00726527	0	0	0	0.000263288	0.000561531	0	0	0.000250693	0	0.0014414	0.000246023	0.0010985	0.00583891	0.000606146	0.000506873	0	0.00382163	0	0.0103362	OH-But
CS78790	1	Ty-1	0.000831584	0	0	0	0	0.00237588	0	0	3.85503e-05	0	0	0	0.00038524	0.000205963	0	0	0.0030989	0.000380385	0	0	0.00160252	0.00155966	0.00702768	Allyl
CS78790	2	Ty-1	0.00121061	0	0	6.23884e-05	0	0.00371153	0	0	0	0	0	0	0.000131833	0.000394237	0	0	0.00512138	0.000311424	0	0	0.00203531	0	0.0119834	Allyl
CS78791	2	UKID96	0.0071765	0	0	0.000455082	0	0	0	0	0	0	0	0	0.000282198	0.000118691	0	0	0.001867	3.25099e-05	0	0	0.00518593	0	0.00934214	3OHP
CS78791	1	UKID96	0.0070843	0	0	0	0	0	0	0	0	0	0	0	0.00109071	0.000110083	0	0.000243503	0.00232356	3.07208e-05	0	0	0.00450478	0	0.0118973	3OHP
CS78792	2	UKNW06-003	0	0	0	0.00669654	0	0	7.82118e-05	0.000161392	0.000291328	0	0	0.000215674	0	0.000830114	0	0.000560269	0.00627535	0.000518582	0.000238187	0	0.00283135	0	0.0127294	OH-But
CS78792	1	UKNW06-003	0	0	0.00198893	0.00305878	0	0	0	0.000192097	0.000194637	0	0	0.000225385	0	0.000785896	0.000359794	0.000614605	0.00619126	0	0.000223509	0	0.00274209	0	0.013352	OH-But
CS78794	1	UKNW06-233	0.00292666	0.0021007	0	0	0	0	0	0.000138003	6.14516e-05	0	0	0	0.00389658	0.000166085	0	7.92589e-05	0.00567511	0.000454047	3.96776e-05	8.94938e-06	0.00657943	0	0.010927	3MSO
CS78794	2	UKNW06-233	0.00294784	0.00347041	0	0	0	0.00015565	0	0.000182233	0	0	1.01189e-05	0	0.00808869	0.000182916	0	0	0.00690741	0.000661821	0	0	0.00478744	0	0.00830041	3MSO
CS78797	1	UKNW06-403	0	0	0.00149599	0.00286214	0	0	0	8.93283e-05	0.000831892	0	0	0.000218067	0	0.00105208	6.32e-05	0.00139735	0.00798816	0	5.49907e-05	7.40395e-06	0.00219415	0	0.0159282	OH-But
CS78797	2	UKNW06-403	0	0	0	0.00279353	0	0	0	9.58712e-05	0.000603965	0	0	0.000189605	0	0.000626842	0.000151712	0.000626786	0.00795994	0.00013725	3.24529e-05	0	0	0	0.0161337	OH-But
CS78798	1	UKNW06-481	0.000158517	0	0.00233562	0.00308735	0	0	0	9.65414e-05	0.000251227	0	0	0.000135558	0	0.00103369	0.000196427	0.00309575	0.0079043	0.000332077	0.000621525	0	0.00409922	0	0.0158337	OH-But
CS78798	2	UKNW06-481	0	0	0	0.00345475	0	0	0	0	0.000292438	0	0	3.35855e-05	0	0.000592909	6.16033e-05	0.00132033	0.00488206	0.000106074	0.00037277	0	0.00109233	0	0.00859123	OH-But
CS78799	2	UKSE06-118	0	0	0.000118681	0.00639298	0	0	0	0.000131387	0.000511461	0	0	4.76077e-05	0	0.000423723	0	0.000991808	0.00374025	0.000326848	0.000351446	0	0.00257919	0	0.00883313	OH-But
CS78799	1	UKSE06-118	0	0	0.00238526	0.00398371	0	0	0	0.000200863	0.000234031	0	0	7.42856e-05	0	0.000438609	0.0002699	0.00143655	0.00434644	0.000460329	0.000364434	0	0.00248314	0	0.0114392	OH-But
CS78800	1	UKSE06-252	0.00230155	0.000401846	0	0	0	0	0	0.000204656	0	0	0	0	0.00486722	0.000102261	0	9.27457e-05	0.00411923	0.00058426	0	0	0.0042525	0	0.00970297	3MSO
CS78800	2	UKSE06-252	0.00310376	0.00074945	0	0	0	0.000239401	0	0.00027704	0	0	0	0	0.00496016	0.000112198	0	0	0.00629387	0.000111898	0	0	0.0037633	0	0.0136669	3MSO
CS78801	1	UKSE06-325	0.000195806	0	0.00100028	0.00168139	0	0	0	9.99556e-05	0	0	0	3.59312e-05	4.50983e-05	0.000575305	0	0.000468167	0.00557999	0.000322237	9.04482e-05	0	0.00293204	0	0.0110387	OH-But
CS78801	2	UKSE06-325	0.000465741	0	0	0.00844531	0	0.000499968	0	0.000474206	0.000134164	0	0	3.54589e-05	0.000258147	0.000836613	0.000190988	0.0012932	0.00755318	0.000176223	0	0	0.0010137	0	0.00546233	OH-But
CS78802	2	UKSE06-362	0.00148396	0	0	6.35917e-05	0	0.00128723	0	0	0	0	0	0	0	0.000209717	0	0	0.00323403	0.000547349	0	0	0.00328872	0	0.00865798	Allyl
CS78802	1	UKSE06-362	0.000888314	0	0	0	0	0.0020906	0	0	0	0	0	0	0.000104874	0.000162002	0	4.85689e-05	0.00408667	0.000773338	0	0	0.00325993	0	0.014341	Allyl
CS78803	2	UKSE06-432	0	0	0	0.00503574	0	0	0	7.82114e-05	0.000250439	0	0	3.17728e-05	8.68535e-05	0.000508572	8.42053e-05	0.000602058	0.006272	0.000576177	0.000210382	0	0.00208449	0	0.0110579	OH-But
CS78803	1	UKSE06-432	0	0	0.00151996	0.00265237	0	0	0	0.000140386	0.000154551	0	0	5.15026e-05	0.000167727	0.000510384	0	0.000773461	0.00719297	0.00070174	0.000232095	0	0.00219332	0	0.0129883	OH-But
CS78804	2	UKSE06-470	0	0	0.000157572	0.00622341	0	0	6.67194e-05	0.000265353	0.000278254	0	0	0.000285311	0	0.000858941	0.000379983	0.000407216	0.00728155	0.000343005	0.000225351	0	0.000981187	0	0.0104725	OH-But
CS78804	1	UKSE06-470	0	0	0.00110064	0.00160455	0	0	0	0.000101246	0.000118971	0	0	0.000169244	0	0.000570492	0.000241845	0.00048853	0.00402344	0.000302722	8.43345e-05	0	0.00144497	0	0.00782683	OH-But
CS78805	1	UKSE06-500	0	0	0.00274723	0.00367378	0	0	3.72234e-05	0.000178823	0.000163512	0	0	0.000151513	0	0.000603451	0.000249849	0.00147821	0.00485655	0.000443639	0.000312445	0	0.00352165	0	0.0121497	OH-But
CS78805	2	UKSE06-500	0	0	0	0.00528438	0	0	0	0.0001304	0.000201675	0	0	0.000181477	0	0.000586118	0.000247905	0.00096163	0.00481158	0.000243684	0.000357034	0	0.00378018	0	0.008919	OH-But
CS78806	1	UKSE06-533	0	0	0.00121056	0.00228179	0	0	0	0.000105743	0.000592743	0	0	0	0	0.000277534	0.000167963	0.00491474	0.00393395	0.000291692	0.000175366	1.25618e-05	0.00260961	0	0.014609	OH-But
CS78806	2	UKSE06-533	0	0	0	0.000692585	0.00189485	0	0	0	0.000493003	0	0	0	0	0.000127444	0	0.00385683	0.002207	9.44748e-05	7.52072e-05	0	0.00242671	0	0.00924679	OH-But
CS78807	1	UKSE06-639	0.000270299	0	0.00182678	0	0.000280309	0	0	0	0	0	0	5.77395e-05	0	0.000452208	0	0.00650998	0.00344396	0.000505899	0.000612344	0	0.00360761	0	0.00646314	OH-But
CS78807	2	UKSE06-639	0	0	0	0.00276168	0	0	0	0.000191587	0.000208894	0	0	9.26551e-05	0	0.000526886	0.000216853	0.000334657	0.00607584	0.000345258	0.000249784	0	0.00114289	0	0.00828465	OH-But
CS78808	2	UKSW06-179	0	0	0	0.00148521	0.00271682	0	0	0	0.000408805	0	0	5.00524e-05	0	0.000574903	0	0.00141584	0.00291941	0.00028809	0.000379579	0	0.00339735	0	0.0117156	OH-But
CS78808	1	UKSW06-179	0	0	0.00148409	0.00199494	0	0	0	0	0.000163476	0	0	8.67599e-05	0	0.000553187	0.000102213	0.00258305	0.00279343	0.000183464	0.000411658	0	0.00259748	0	0.00904962	OH-But
CS78809	1	UKSW06-207	0	0	0.00150131	0.00156672	0	0	0	0.00032025	0.000127386	0	0	0.000121653	0	0.00102302	0	0.000651819	0.00790847	0.000267207	0.000318603	0	0.0020735	0	0.010787	OH-But
CS78810	1	UKSW06-226	0.000121396	0	0.00208215	0.00299789	0	0	0	0	0.000262709	0	0	7.79194e-05	0.000118379	0.000542091	0.000172664	0.00419858	0.00411607	0.000289277	0.000752878	0	0.00303189	0	0.0107262	OH-But
CS78810	2	UKSW06-226	0.000450103	0	0	0.00302654	0	0	0	0	0.000312289	0	0	0	4.62438e-05	0.000320124	0	0.00239854	0.00338144	0.000141958	0.000477789	0	0.00106087	0	0.00486127	OH-But
CS78811	1	UKSW06-285	0.000116222	0	0.00162732	0.00240238	0	0	0	9.48973e-05	0.000177653	0	0	8.43953e-05	0	0.000507236	0.000179443	0.00177899	0.00388853	0.000310289	0.000435648	0	0.00278805	0	0.0128145	OH-But
CS78811	2	UKSW06-285	0.000252913	0	0	0.00113073	0.00180856	0	0	0	0.000243328	0	0	3.6759e-05	0	0.000324003	0	0.000589857	0.00275071	0.000129853	0.000286445	0	0.00292036	0	0.0102986	OH-But
CS78812	1	UKSW06-302	0	0	0.00179767	0.00265955	0	0	0	0.000124236	0.000211596	0	0	0.000154613	0	0.000551728	0.000249117	0.000836544	0.00503399	0.000346341	0.000185806	0	0.00243176	0	0.0135048	OH-But
CS78812	2	UKSW06-302	0	0	0	0.0007532	0.00175205	0	0	0	0.00018994	0	0	0.000157266	0	0.000513546	0	0.000235695	0.00532765	0.000165974	0.000205703	0	0.00231626	0	0.0115624	OH-But
CS78814	1	UKSW06-360	0	0	0.000624877	0.001074	0	0	0	0	0.00019344	0	0	0.000149075	0	0.00150782	0	0.000903922	0.00830024	0.000597336	0.000289081	0	0.00350318	0	0.011582	OH-But
CS78815	1	Ulies-1	0.0013005	0	0	0	0	0.00346028	0	0	0	0	0	0	0.000882895	0.000250494	0	5.69038e-05	0.00487113	0.000497106	0	0	0.00315085	0	0.0130478	Allyl
CS78815	2	Ulies-1	0.00168025	0	0	0.000122375	0	0.00531535	0	0	0	0	0	0	0.000250612	0.000130568	0	0	0.0032415	0.000553295	0	0	0.00276871	0	0.00863981	Allyl
CS78816	2	Ull1-1	0.00147597	0.000322682	0	0	0	0.00119283	0	0	0	0	0	0	0.00186481	0.000153063	0	0	0.00458745	2.09383e-05	0	0	0.0040155	0	0.00874397	Allyl
CS78816	1	Ull1-1	0.00140841	0.000963764	0	0	0	0.000949572	0	0	0	0	0	0	0.00415166	0.000222559	0	7.30367e-05	0.00684721	2.17478e-05	0	0	0.00315431	0	0.00823144	Allyl
CS78817	2	Ull2-3	0.00178592	0	0	0	0	0	0	0	0	0	0	0	0.000191642	0.000103826	0	0	0.00231023	0.000214405	0	0	0.00375721	0	0.00878406	3OHP
CS78817	1	Ull2-3	0.00265752	0	0	0	0	0	0	0	0	0	0	0	0.000515219	0.000127179	0	8.04514e-05	0.00351543	0.000536077	0	0	0.00425809	0	0.0118434	3OHP
CS78818	1	Ull2-5	0.000574371	0	0	0	0	0.000291375	0	0	0	0	0	0	0.000105801	0.000288034	0	0	0.00889062	0.000272088	0	0	0.00149523	0.00292952	0.0140671	Allyl
CS78819	1	Ull3-4	0.000589669	0	0	0	0	0.00047402	0	0	4.50103e-05	0	0	0	7.28021e-05	0.000400482	0	0.000135526	0.00598039	0.000609391	0	0	0.00197546	0.00420768	0.0127092	Allyl
CS78819	2	Ull3-4	0.00145262	0	0	0	0	0.00108497	0	0	5.66188e-05	0	0	0	0.000161814	0.00041988	0.000912901	0	0.0051718	0.000714733	0	0	0.000588489	0	0.00618971	Allyl
CS78820	2	Ull-A-1	0.000306337	0	0.00194677	0	0.000596917	0	0	0	0	0	0	4.92111e-05	0	0.000293897	0	0.00643189	0.00301887	0.000458032	0.000411656	0	0.00252483	0	0.0048442	4MSO
CS78820	1	Ull-A-1	0.000120607	0	0.000955178	0	9.72792e-05	0	0	0	0	0	0	5.86381e-05	0	0.000501283	0	0.003121	0.00581771	0.000485756	0.000298171	0	0.00245712	0	0.00839228	4MSO
CS78821	1	Ullapool-8	0	0	0.00391269	0.004499	0	0	0	0.000120501	0.000336987	0	0	0	0	0.00050487	0.000185208	0.00175722	0.00372517	0.000340932	0.000241872	0	0.0040098	0	0.0104979	OH-But
CS78821	2	Ullapool-8	0	0	0	0.00294613	0.00362243	0	0	0	0.00023745	0	0	2.89869e-05	0	0.000453238	0	0.00103978	0.00389136	0.000183177	0.000187354	0	0.00437467	0	0.00909532	OH-But
CS78823	2	Uod-7	0.000992884	0	0	5.65655e-05	0	0.000978791	0	0	0	0	0	0	0.000435527	0.000121725	0	0	0.00240743	0.000220375	0	0	0.0022498	0	0.0083476	Allyl
CS78823	1	Uod-7	0.000723073	0	0	0	0	0.000561979	0	0	0	0	0	0	0.000551388	0.000187904	0	0	0.00290463	0.000167722	0.000162813	0	0.00261675	0	0.0101465	Allyl
CS78824	1	IP-Urd-1	0.000156569	0	0.000655858	0.00128085	0	0.000509616	0	0	0	0	0	5.03615e-05	0	0.000269413	0	4.55412e-05	0.00583253	0.000225783	0	0	0.000914727	0	0.0153424	OH-But
CS78824	2	IP-Urd-1	0.000602917	0	0	0.00416393	0	0.00125074	0	0.000278429	0	0	0	6.98518e-05	0	0.000339743	0.000500563	0.000147138	0.00481918	0.000318188	0	0	0.00278115	0	0.00864968	OH-But
CS78825	1	IP-Usa-0	0.000975893	0	0	0	0	0.00261352	0	0	6.0024e-05	0	0	0	0.000274518	0.000229228	0	0	0.00882649	0.000413708	0	0	0.00131278	0	0.00903876	Allyl
CS78826	1	IP-Vad-0	0.000556608	0	0.00110095	0.00164964	0	0.000757031	0	0.000401048	6.32261e-05	0	0	0	3.84372e-05	0.000414852	0	0.000547795	0.00948492	0.000239069	0	0	0.0027487	0	0.012208	OH-But
CS78826	2	IP-Vad-0	0.000978481	0	0	0.00321129	0	0.00091075	0	0.000285301	0.000120693	0	0	0	4.07517e-05	0.000498109	0	0.000655638	0.00959837	0.000104577	0	0	0.00380475	0	0.0113667	OH-But
CS78827	1	IP-Vae-2	0.000323695	0	0	0	0	0.00109553	0	0	0	0	0	5.9772e-05	0.000111916	0.000531951	0	0	0.0153409	0	0	0	0.000883081	0.00220687	0.0118648	Allyl
CS78828	2	Vajug-1	0.000919737	0	0	0.00338097	0	0.00242443	0	0.000538638	0.000139703	0	0	0	5.2606e-05	0.000487199	8.24821e-05	0.00178377	0.00752454	0.000216291	0	0	0.00313385	0	0.0114702	OH-But
CS78828	1	Vajug-1	0.000631127	0	0.000534831	0.00117747	0	0.00234405	0	0.000612742	0.000154164	0	0	4.7383e-05	0	0.000504274	0	0.000894667	0.00937652	9.81452e-05	0	0	0.000945635	0	0.00695873	OH-But
CS78830	1	V?r2-1	0.00080601	0	0	0	0	0.00117879	0	0	0	0	0	0	6.85512e-05	0.000294408	0	0	0.00796042	0.000447132	0	0	0.00141211	0.00406709	0.0142284	Allyl
CS78831	1	V?r2-6	0.000501814	0	0	0	0	0.00245862	0	0	0	0	0	0	0	0.000236747	0	0	0.00595389	0.00056606	0	0	0.00157944	0	0.0100874	Allyl
CS78832	1	V?rA 1	0.000490371	0	0	0	0	0.00157814	0	0	9.64492e-05	0	0	0	9.55779e-05	0.000332799	0	0	0.00839559	0.00116046	0	0	0.00158203	0.00415754	0.0148756	Allyl
CS78833	1	IP-Vas-0	0.00661573	0	0.00024036	0	0	0	0	0	0	0	0	0	0.00142618	0.000126229	0	0.000145712	0.00258708	0.000188114	0	0	0.00654479	0	0.00870958	3OHP
CS78835	1	IP-Vav-0	0.000142121	0	0.0020736	0.000775111	0	0	0	0.00284245	0	0	0	7.00357e-05	0	0.000372302	0.00043881	0.00335202	0.004403	0.000551025	0.000496153	0	0.00347838	0	0.0129198	OH-But
CS78835	2	IP-Vav-0	0.000309043	0	0	0.00272197	0	0.000376714	0	0.00249644	0	0	0	2.81467e-05	0	0.00024418	0.000423023	0.00280282	0.00299218	0.000491452	0.000449345	0	0.00340378	0	0.00908583	OH-But
CS78836	1	IP-Vaz-0	0.000752695	0	0	0	0	0.00156845	0	0	9.47664e-05	0	0	0	9.07404e-05	0.000202836	0	0	0.0066493	0.000672057	0	0	0.000957184	0	0.0155039	Allyl
CS78837	2	IP-Vdm-0	0.000990203	0	0	0	0	0.00423941	0	0	7.10372e-05	0	0	0	0	0.00034335	0.000427653	0	0.00887431	0.000301103	0	0	0.000934574	0.00202634	0.0106636	Allyl
CS78837	1	IP-Vdm-0	0.000762173	0	0	0	0	0.00143296	0	0	7.89331e-05	0	0	0	6.47733e-05	0.000184536	0	0	0.00918081	0.000335882	0	0	0.00111586	0	0.0169575	Allyl
CS78838	2	IP-Vdt-0	0.00144282	0	0	0.000146308	0	0.00224531	0	0	0	0	0	0	0.000201907	0.000134445	0	0	0.00369313	8.89669e-05	0	0	0.00276498	0	0.0122697	Allyl
CS78838	1	IP-Vdt-0	0.00149341	0	0	0	0	0.00146745	0	0	4.71699e-05	0	0	0	0.000165379	0.000265693	0	0	0.00616238	4.68084e-05	0	0	0.000470865	0	0.00715075	Allyl
CS78839	1	VED-10	0.000403243	0	0	0	0.000230704	0	0	0	0	0	0	0	0	0.000139227	0	0.00941853	0.00254919	3.99712e-05	0.000311551	0	0.00112442	0.00198723	0.00511695	4MSO
CS78839	2	VED-10	0.000354352	0	0.000102898	0	0.000299855	0	0	0	0	0	0	0	0	0.000157221	0	0.0102736	0.0013703	6.03848e-05	0.00040368	0	0.00165145	0	0.00314244	4MSO
CS78840	1	IP-Ven-0	0.000458946	0	0	0	0	0.000302804	0	0	0	0	0	0	0.000158461	0.000559827	0	7.6029e-05	0.00819414	0.000448582	0	0	0.00172287	0.00359951	0.0131167	Allyl
CS78840	2	IP-Ven-0	0.00164673	0	0	0	0	0.0015377	0	0	0	0	0	0	0.000268556	0.0010341	0.000993422	0	0.0123595	0.000499748	0	0	0.00123492	0	0.0119572	Allyl
CS78841	2	IP-Ver-5	0.000436859	0	0	0.00128673	0	0.000464006	0	7.54273e-05	0	0	0	0	4.70343e-05	0.000296414	0	0.00115586	0.00535747	0.000197854	0	0	0.00109408	0	0.00800601	OH-But
CS78841	1	IP-Ver-5	0.000313597	0	0.000648771	0.00110761	0	0.000495013	0	0.000114134	0	0	0	0	0	0.000444763	0	0.00158049	0.00703845	0.000221115	0	0	0.00259105	0	0.0128	OH-But
CS78842	1	IP-Vid-1	0	0	0.00126068	0.00130493	0	0	0	0.00159335	0	0	0	3.69983e-05	5.46565e-05	0.000273991	0.000357691	0.0014845	0.00229969	0.000248138	0	0	0.00141787	0	0.00504336	OH-But
CS78842	2	IP-Vid-1	0.00026515	0	0	0.00305159	0	0	0	0.00100054	0	0	0	0	3.41879e-05	0.000285502	0	0.00238205	0.00254231	0.000350298	0.000731971	0	0.00281444	0	0.00568303	OH-But
CS78843	1	IP-Vig-1	0.00102699	0	0	0	0	0.000807538	0	0	0	0	0	0	0.00020253	9.288e-05	0	0	0.00229866	5.99504e-05	0	0	0.00209598	0	0.00613321	Allyl
CS78843	2	IP-Vig-1	0.00135861	0	0	0	0	0.00110758	0	0	0	0	0	0	9.31819e-05	0.000227843	0	0	0.00410395	0.000102968	0	0	0.00265543	0	0.00886753	Allyl
CS78844	1	IP-Vim-0	0.00103568	0	0	0	0	0.00168139	0	0	0	0	0	0	0.000205992	0.000305725	0	0.000208786	0.00781377	0.000837058	0	0	0.000866894	0	0.0118873	Allyl
CS78844	2	IP-Vim-0	0.00126373	0	0	9.52338e-05	0	0.00255202	0	0	0	0	0	0	0.000227203	0.000247901	0	0	0.00832229	0.000802932	0.000225964	0	0.00272418	0	0.0144864	Allyl
cs78845	2	Vimmerby	0.00153527	0	0	0	0	0.00350467	0	0	4.60246e-05	0	0	0	0.00010129	0.00023532	0.000998978	0	0.00414923	0.000384931	0	0	0.00160984	0.00206097	0.0085673	Allyl
CS78846	1	IP-Vin-0	0.00017224	0	0.000937789	0	0.000309764	0	0	0	0	0	0	0	0	0.000212216	0	0.00749809	0.00223285	0.000231964	0.000591375	0	0.00344653	0	0.00808104	4MSO
CS78846	2	IP-Vin-0	0.00116424	7.65016e-05	0	6.63763e-05	0	0.000875165	0	0	0	0	0	3.15945e-05	0.001487	0.000260075	0	0	0.00572955	0.000370347	0	0	0.00250249	0	0.0127285	4MSO
CS78847	1	Vinsl??v	0.00158394	0	0	0	0	0	0	0	0	0	0	0	0.000142889	8.19587e-05	0	0.000189239	0.00184681	0.000146006	0	0	0.00450865	0	0.0114843	3OHP
CS78847	2	Vinsl??v	0.00260328	0	0	0	0	0	0	0	0	0	0	0	0.00013587	7.31947e-05	0	0	0.00154515	0.000251431	0	0	0.0043796	0	0.00795514	3OHP
CS78848	2	IP-Vis-0	0.000937142	0	0	0	0	0.00181568	0	0	0	0	0	0	0	0.000188279	0.000644784	0	0.00420004	0.000338058	0	0	0.001096	0	0.00679796	OH-But
CS78848	1	IP-Vis-0	0	0	0.000520061	0.00112539	0	0	0	0.00103242	0.000187671	0	0	0	0	0.000224753	0	0.00402658	0.00470143	0.000387486	0	1.78171e-05	0.00145094	0	0.00970004	OH-But
CS78849	1	IP-Voz-0	0.000299197	0	0	0	0	0.000234784	0	0	0	0	0	0	4.7981e-05	0.00017522	0	0	0.00461256	0.000249947	0	0	0.000671999	0.00209336	0.0119521	Allyl
CS78849	2	IP-Voz-0	0.00094386	0	0	0	0	0.00095857	0	0	0	0	0	0	0.000382455	0.000198209	0.000953624	0	0.00472756	0.000277678	0	0	0.000678469	0	0.00996954	Allyl
CS78850	2	IP-Vpa-1	0.00149536	0	0	0.000190801	0	0.00545111	0	0	0.000132492	0	0	0	0.000270226	0.000425512	0	0	0.0107129	0.000425843	0	0	0.00275679	0	0.0131762	Allyl
CS78850	1	IP-Vpa-1	0.000873757	0	0	0	0	0.00296016	0	0	7.81987e-05	0	0	0	0.000273995	0.000429063	0	4.50328e-05	0.0101441	0.000457667	0	0	0.000554614	0	0.00784253	Allyl
CS78852	2	Wank-2	0.00396737	0	0	0	0	0	0	0	0	0	0	0	0.00039685	8.18539e-05	0	0	0.00235265	8.47618e-05	0	0	0.00689454	0	0.0102053	3OHP
CS78852	1	Wank-2	0.00568886	0	0	0	0	0	0	0	0	0	0	0	0.000681806	0.000110766	0	0.000206556	0.00311863	0.000181452	0	0	0.00701803	0	0.0127408	3OHP
CS78854	1	WAV-8	0	0	0.00131512	0.00294658	0	0	0	0	0.00060096	0	0	0.000246221	0	0.00140981	0	0.00294755	0.0061507	0	0	1.2936e-05	0.0020241	0	0.00650202	OH-But
CS78854	2	WAV-8	0	0	0.000136633	0.00473948	0	0	0	0	0.0008629	0	0	0.000159254	0	0.00087082	0	0.00224666	0.00612687	0.000154416	0.000135908	0	0.00111714	0	0.00743475	OH-But
CS78855	1	Wil-1	0.00473948	0.00022656	0	0	0	0	0	0	0	0	0	0	0.00260286	0.000172577	0	0.000140814	0.00452312	4.28162e-05	0	0	0.0050721	0	0.00904149	3OHP
CS78855	2	Wil-1	0.00372429	0	0	0	0	0	0	0	0	0	0	0	0.000453857	0.000143098	0	0	0.00225632	0.000197494	0	0	0.00490961	0	0.00593966	3OHP
CS78856	2	Wil-2	0.00540523	0	0	0	0	0	0	0	0	0	0	0	0.000350364	0.000137051	0	0	0.00327397	0.000409121	0	0	0.0043588	0	0.00706287	3OHP
CS78856	1	Wil-2	0.00925413	0	0	0	0	0	0	0	0	0	0	0	0.0006237	0.000207632	0	0.000236249	0.00546229	0.000385293	0	0	0.00401157	0	0.00926349	3OHP
CS78858	2	Wu-0	0.00440156	0	0	0	0	0.000623772	0	0	0	0	0	0	0.000210981	0.000224595	0	0	0.00460342	0.000181219	0	0	0.00480305	0	0.0165913	3OHP
CS78858	1	Wu-0	0.00511555	0	0	0	0	0.00113758	0	0	0	0	0	0	0.000747777	0.000190418	0	0.000150243	0.00458688	0.000319741	0	0	0.00454538	0	0.0102294	3OHP
CS78861	1	Xan-5	0.00333019	0	0	0	0	0	0	0	0	0	0	0	0.00147367	0.000119846	0	0.000171447	0.00209894	0.000308349	0	0	0.00829869	0	0.00792159	3OHP
CS78861	2	Xan-5	0.00545013	0	0	0	0	0.00031899	0	0	0	0	0	0	0.000996879	0.000129875	0.00111505	0.000176677	0.00169612	0.00029835	0	0	0.00536387	0	0.00376407	3OHP
CS78862	1	Xan-6	0.00689628	0	0.000439188	0	0	0	0	0	0	0	0	0	0.00189948	0.000106538	0	0.000240211	0	0.00016952	0	0	0.00729209	0	0.00684348	3OHP
CS78864	2	Yeg-2	0.00075297	0	0	0.00174784	0.00105219	0.00280931	0	0.00259417	0	0	0	4.63942e-05	0	0.000311179	0	0.000581977	0.00384097	0.000353088	0	0	0.00380693	0	0.00849524	OH-But
CS78864	1	Yeg-2	0.000583024	0	0.0020809	0.0020287	0	0.00252857	0	0.00334127	0	0	0	0	0	0.000248584	0.000112676	0.000937611	0.00398892	0.00038495	0	0	0.00270829	0	0.00799123	OH-But
CS78865	2	Yeg-4	0.000555616	0	0	0.00223281	0	0.00221968	0	0.00235614	0	0	0	4.18792e-05	0	0.000300924	0	0.000566122	0.0035895	0.000278235	0	0	0.00381268	0	0.00860885	OH-But
CS78865	1	Yeg-4	0.000627357	0	0.00239676	0.00172561	0	0.00239418	0	0.00305889	0	5.87931e-05	0	0	0	0.000348639	0.000121315	0.00131435	0.00422517	0.000473819	0	0	0.00411873	0	0.00916003	OH-But
CS78866	2	Yeg-5	0.000534657	0	0	0.00182326	0	0.00227145	0	0.00256807	0	0	0	3.39378e-05	0	0.000313083	0	0.000595709	0.00356823	0.000170061	0	0	0.00308873	0	0.00945045	OH-But
CS78866	1	Yeg-5	0.00038581	0	0.00147004	0.000909428	0.00125237	0	0	0.00212659	0	0	0	0	0	0.000240271	8.12532e-05	0.00106326	0.00300408	0.000238891	0	0	0.00307531	0	0.00702862	OH-But
CS78867	1	Yeg-7	0.000314757	0	0.00146274	0.00139337	0	0.000966703	0	0.00208996	0	0	0	0	0	0.000209474	0	0.00124488	0.00424423	0.000274121	8.51376e-05	0	0.00299147	0	0.00942749	OH-But
CS78867	2	Yeg-7	0.000535053	0	0	0.0021708	0	0.00142427	0	0.00317725	0	0	0	0	4.2261e-05	0.000203975	0.000129793	0.000618875	0.00436818	0.000213783	0	0	0.00240444	0	0.0110025	OH-But
CS78868	1	Yeg-8	0.00025098	0	0.00113966	0.00087044	0	0.000634453	0	0.00132449	0	0	0	0	0	0.000175654	9.57365e-05	0.000359886	0.00375693	0.000228981	6.02649e-05	0	0.00277801	0	0.00935928	OH-But
CS78868	2	Yeg-8	0.000485387	0	0	0.00291412	0	0.00155791	0	0.00301744	0	0	0	0	3.9541e-05	0.000175364	0	0.000891507	0.00341161	0.000300232	0	0	0.00304602	0	0.0114427	OH-But
CS78870	1	Zabar-1	0.000403399	0	0	0	0	0.00136293	0	0	0	0	0	0	5.55692e-05	0.000238164	0	0	0.00598099	0.000292233	0	0	0.00127069	0.00302113	0.0149563	Allyl
CS78871	1	Zagub-1	0.000304687	0	0.00131177	0.0015495	0	0.000396155	0	0	0	0	0	0	0	0.000161006	0	0.000184694	0.0031475	0.000310255	0	0	0.00325964	0	0.0118376	OH-But
CS78871	2	Zagub-1	0.000651075	0	0	0.00728393	0	0.00117334	0	8.91866e-05	0.000149664	0	0	0	0	0.000239548	4.07044e-05	0	0.00292987	0.00045706	0	0	0.00447008	0	0.0121099	OH-But
CS78873	1	Zdarec3	0.0021852	0	0	0	0	0	0	0	0	0	0	0	0.000730536	0.000108561	0	0.000202704	0.00308262	0.000237844	0	0	0.0052461	0	0.0139281	3OHP
CS78873	2	Zdarec3	0.00164641	0	0	0	0	0	0	0	0	0	0	0	0.000126736	9.70482e-05	0	0	0.00193919	0.000219136	0	0	0.00390443	0	0.00691381	3OHP
CS78875	1	ZdrI 1-23	0.00165068	0	0	0	0	0	0	0	0	0	0	0	6.89656e-05	0.000188505	0	0.000204231	0.0032757	0.00022857	0	0	0.00286313	0	0.00844818	3OHP
CS78875	2	ZdrI 1-23	0.00186753	0	0	0	0	0	0	0	0	0	0	0	0	0.000158939	0	0	0.00300888	0.000138971	0	0	0.00120813	0	0.00828182	3OHP
CS78876	1	ZdrI 2-21	0.00645009	0	0	0	0	0	0	0	0	0	0	0	0.00114358	0.00015842	0	0.00021717	0.0038978	0.000287351	0	0	0.00501419	0	0.00993053	3OHP
CS78876	2	ZdrI 2-21	0.00262904	0	0	0	0	0	0	0	0	0	0	0	0.000173443	0.000190458	0	0	0.00314146	0.000116656	0	0	0.00334146	0	0.00771258	3OHP
CS78877	1	ZdrI 2-9	0.00657866	0.000185121	0	0	0	0	0	0	0	0	0	0	0.00199939	0.000172681	0	0.000252034	0.00643528	0	0	0	0.00584306	0	0.0133966	3OHP
CS78877	2	ZdrI 2-9	0.00337682	0	0.000109397	0.0001949	0	0	0	0	0	0	0	0	0.000511134	9.77884e-05	0	0	0.00250663	6.37523e-05	0	0	0.00456628	0	0.00835788	3OHP
CS78878	1	Zerev-1-34	0.000232284	0	0.000408515	0.000477837	0	0.000946994	0	0.000864519	8.35666e-05	0	0	0	0	0.000277614	0	0.000493697	0.00463908	0.000391924	0	0	0.00108765	0	0.0140526	OH-But
CS78879	2	Zerev-1-35	0.00334641	0.000149796	0	0	0	0.00568865	0	9.53984e-05	0	0	0	0	0.00139406	0.00037369	0.00142919	0	0.00637458	0.000573041	0	0	0.00440389	0	0.00975584	Allyl
CS78879	1	Zerev-1-35	0.00121232	0	0.000103658	0.000128331	0	0.00190493	0	0	0	0	0	0	0.00037649	0.000153605	0	3.32527e-05	0.00582353	0.000450972	0	0	0.00339122	0	0.0119908	Allyl
CS78880	1	Zu-0	0	0	0.0024568	0.00372144	0	0	0	0.000117336	0.00028145	0	0	6.2033e-05	0	0.000571628	0	0.00145656	0.00423124	0.000418544	0.000239843	0	0.00363741	0	0.0103062	OH-But
CS78880	2	Zu-0	0.000131197	0	0	0.0112234	0	0	0	0.000151645	0.000602467	0	0	0.000103115	0	0.000865406	0.000302846	0.00228396	0.00528267	0.000264545	0.000463374	0	0.0033358	0	0.0104141	OH-But
CS78881	1	Zu-1	0.00161233	0.000443964	0	0	0	0.00205567	0	0	0	0	0	0	0.00642983	0.000137977	0	0.000205685	0.00400545	6.91998e-05	0	0	0.00289139	0	0.011173	Allyl
CS78881	2	Zu-1	0.00162147	0	0	7.88559e-05	0	0.00204431	0	0	0	0	0	0	0.00223976	0.000107415	0	0	0.00245375	0.00020623	0	0	0.00361156	0	0.00969181	Allyl
CS78882	1	Zupan-1	0.00142931	0	9.85273e-05	0.000101464	0	0.00103447	0	0	5.62673e-05	0	0	0	0.000333567	0.000296319	0	5.20286e-05	0.00468433	0.000400673	0	0	0.00263256	0.00202926	0.0079796	Allyl
CS78882	2	Zupan-1	0.00160104	0	0	0.00018836	0	0.00132661	0	0	4.31306e-05	0	0	0	0.00033009	0.000213528	0	0	0.00413747	0.000333556	0	0	0.00310175	0	0.0115912	Allyl
CS78886	1	IP-Ang-0	0	0	0.000284576	0.000996043	0	0	0	0	0.000251466	0	0	7.82322e-05	0	0.000571467	0	0.00189522	0.00559207	0	0	7.34963e-06	0.00114599	0	0.00832173	OH-But
CS78886	2	IP-Ang-0	0	0	0	0.00198423	0	0	0	0	0.000358465	0	0	0.000166178	0	0.000963614	0	0.00242271	0.00722238	0.000113114	0.000221359	0	0	0.00512791	0.010053	OH-But
CS78888	1	Bs-1	0.000117414	0	0.00248851	0.00337466	0	0	0	0	0.000176325	0	0	8.58978e-05	0	0.000538867	0.000135054	0.00173654	0.00279382	0.000406384	0.000420227	0	0.00337886	0	0.00887264	OH-But
CS78888	2	Bs-1	0.000188073	0	0	0.00443545	0	0	0	0	0.000157445	0	0	4.17104e-05	0	0.000461811	0	0.000633971	0.00235645	0.000440358	0.000198712	0	0.00273415	0	0.00764823	OH-But
CS78890	2	IP-Cal-0	0.00247247	0	0	0	0	0.00449198	0	0	0	0	0	0	0.000237553	0.000204104	0.00101148	6.09422e-05	0.00291372	0.00106544	0	0	0.00302045	0.00285387	0.00687179	Allyl
CS78890	1	IP-Cal-0	0.00141734	0	0	0	0	0.00128385	0	0	6.88198e-05	0	0	0	0.000136793	0.000144953	0	8.53346e-05	0.00415363	0.000853137	0	0	0.00215287	0.00354919	0.0122146	Allyl
CS78891	1	Castelfed-4-210	0.00129691	7.22117e-05	0	0	0	0.00315827	0	0	0	0	0	0	0.00091948	0.000256421	0	0.000131418	0.00588866	0	0	0	0.00071144	0	0.00722012	Allyl
CS78891	2	Castelfed-4-210	0.00216009	0.000216357	0	9.44072e-05	0	0.00560021	0	6.46858e-05	0	0	0	0	0.00253931	0.000245385	0	0	0.00317292	0.000162072	0	0	0.00366169	0	0.00998087	Allyl
CS78892	1	Castelfed-4-211	0.0013382	0	0	0	0	0.00223928	0	0	0	0	0	0	0.000406113	0.000181915	0	9.29172e-05	0.0039058	2.23967e-05	0	0	0.000549131	0	0.00603904	Allyl
CS78892	2	Castelfed-4-211	0.00153103	0	0	0.000191996	0	0.00560338	0	0.000104452	0	0	0	0	0.000921853	0.000246196	0	0	0.00398615	0.000109959	0	0	0.00330358	0	0.0127857	Allyl
CS78893	1	Castelfed-4-214	0.00120212	0	0	0	0.00229932	0	0	0	0	0	0	0	0.000783754	0.0002245	0	0.000422594	0.00223227	0	0	0	0.00214537	0.0019857	0.00540382	Allyl
CS78893	2	Castelfed-4-214	0.00401982	0.0001459	0	0.000155457	0	0.00719358	0	5.4998e-05	0	0	0	0	0.00149578	0.00037074	0	0	0.00343072	4.75133e-05	0	0	0.00394615	0	0.011384	Allyl
CS78894	1	CIBC-5	0	0	0.0020974	0.00309718	0	0	0	0.000120656	0.000272772	0	0	0.000144408	0	0.000863602	0.000242775	0.00191667	0.0043747	0.000381755	0.000534948	0	0.00303379	0	0.00932521	OH-But
CS78894	2	CIBC-5	0	0	0	0.00596225	0	0	0	0	0.00054141	0	0	0.000233263	0	0.00126632	0	0.00190649	0.00599293	0.000262931	0.000527798	0	0.00202861	0	0.00814612	OH-But
CS78895	1	Co	0.000165607	0	0.00356494	0.00428836	0	0	0	0.000337954	9.59189e-05	0	0	7.44848e-05	0	0.000584294	0.000250894	0.0032014	0.00620058	0.00031738	0.000294774	0	0.00461524	0	0.00936492	OH-But
CS78895	2	Co	0	0	0	0.0044512	0	0	0	0.000268771	7.12811e-05	0	0	5.64477e-05	0	0.000413015	0.000210546	0.00104281	0.00320003	0.000220781	0.00013262	0	0.00389913	0	0.00632901	OH-But
CS78896	1	Dju-1	0.000528037	0	0	0	0	0.00376256	0	0	5.3086e-05	0	0	0	0.000100253	0.000528774	0	3.27181e-05	0.00980876	0.000770382	0	0	0.00130052	0	0.0187809	Allyl
CS78896	2	Dju-1	0.000945324	0	0	0	0	0.00549146	0	0	0	0	0	0	0.000131004	0.000343114	0.000831581	0	0.00547629	0.000604669	0	0	0.00143997	0.00195998	0.00788605	Allyl
CS78897	1	Dr-0	0.00422322	0.000275175	0	0	0	0	0	0	0	0	0	0	0.00253085	0.000427101	0	0.00022831	0.00815082	1.63951e-05	0	0	0.00478626	0	0.00843106	3OHP
CS78897	2	Dr-0	0.00393403	0	0	0	0	0	0	0	0	0	0	0	0.000102634	0.000410692	0	0	0.00624787	1.43613e-05	0	0	0.00528689	0	0.00565732	3OHP
CS78898	1	Er-0	0.00183977	9.72798e-05	0	0	0	0.00355262	0	0	0	0	0	0	0.00113986	0.000396823	0	0	0.00627665	0.000201996	0	0	0.00388161	0	0.0109918	Allyl
CS78898	2	Er-0	0.00147124	0	0	0	0	0.00132841	0	0	6.80824e-05	0	0	0	0.00015699	0.000335376	0	0	0.00556347	8.20278e-05	0	0	0.00199903	0	0.00446805	Allyl
CS78901	1	Gy-0	0.000106921	0	0.00149688	0.00169097	0	0	0	0	0.000150817	0	0	0.000103506	0	0.000716094	0.000159157	0.0027785	0.00398267	0.000306339	0.000630349	0	0.00425913	0	0.0092349	OH-But
CS78901	2	Gy-0	0.000293721	0	0	0.00250288	0	0	0	0	0.000282891	0	0	4.41154e-05	0	0.000521436	4.96252e-05	0.00081571	0.00379962	0.000315573	0.000292563	0	0.00349944	0	0.0073594	OH-But
CS78903	2	In-0	0.000545672	0.0002027	0	7.03945e-05	0	0.00102735	0	0	0	0	0	0	0.00337208	0.000251916	0	0	0.00417568	3.00027e-05	4.96122e-05	0	0.00039131	0	0.00560298	Allyl
CS78903	1	In-0	0.000278586	0.000727668	0	0	0	0.00214198	0	0	0	0	0	0	0.00506918	0.000326654	0	0.000110347	0.00704719	2.94923e-05	0	0	0.000333005	0.00153653	0.00825111	Allyl
CS78904	1	Is-0	0	0	0.00206022	0	0.000309049	0	5.85585e-05	0	0	0	0	0.000101154	0	0.000436595	0	0.00649613	0.00279089	0.000408849	0.000800873	0	0.00274968	0	0.00946682	OH-But
CS78904	2	Is-0	0	0	0	0.00179014	0.000366976	0	5.65077e-05	0	0	0	0	0	0	0.000209211	0	0.00514694	0.00195721	0.000461626	0.000741377	0	0.00306531	0	0.00924702	OH-But
CS78907	1	Mitterberg-1-179	0.000930739	0	0	0	0	0.00124851	0	0	4.99254e-05	0	0	0	0.000130153	9.37098e-05	0	0	0.00458567	0.000167691	0	0	0.00288095	0	0.0135406	Allyl
CS78907	2	Mitterberg-1-179	0.00464838	0	0	0	0	0.00478855	0	0	4.95851e-05	0	0	0	0.00148046	0.000463199	0.000670375	8.83158e-05	0.00759994	0.000222058	0	0	0.00133928	0	0.0116457	Allyl
CS78909	2	Mitterberg-1-182	0.00215328	0	0	0.000132073	0	0.0018339	0	0	6.40812e-05	0	0	0	0.000277942	0.000239492	0	0	0.00620748	0.000296121	0	0	0.00328494	0	0.0144786	Allyl
CS78909	1	Mitterberg-1-182	0.001713	0	0	0	0	0.00170344	0	0	5.35777e-05	0	0	0	0.000341864	0.000318239	0	5.81048e-05	0.0049142	0.000478396	0	0	0.0010592	0	0.0133375	Allyl
CS78910	1	Mitterberg-1-183	0.000450187	0	0	0	0	0.00104739	0	0	0	0	0	0	0	9.7139e-05	0	0	0.00237341	0.000280712	0	0	0.00222901	0	0.00614738	Allyl
CS78914	2	IP-Pro-0	0.000418003	0	0	0.00403544	0	0	4.18441e-05	0.00064607	8.86757e-05	0	0	8.05547e-05	0	0.000383747	0.000369101	0.0027185	0.00247935	0.000196388	0.000688238	0	0.00391733	0	0.00669539	OH-But
CS78914	1	IP-Pro-0	0.000265164	0	0.00321096	0.00350906	0	0	5.2044e-05	0.000821274	9.79048e-05	0	0	0.000105038	0	0.000664545	0.000393451	0.00418707	0.0049112	0.0003523	0.000661117	0	0.00424072	0	0.0116984	OH-But
CS78915	1	Pt-0	0.00183358	0.000136083	0	0	0	0	0	0	0	0	0	0	0.00174483	0.000219758	0	0.000161878	0.00459287	0.000403826	0	0	0.00347348	0	0.00886088	3MSO
CS78915	2	Pt-0	0.00261612	0.000567383	0	0	0	0	0	0	0	0	0	0	0.00347079	0.000271075	0	0	0.00491132	4.67759e-05	0	0	0.00135838	0	0.00895757	3MSO
CS78916	1	Rhen-1	0.0024772	0	0	0	0	0	0	0	0	0	0	0	5.94524e-05	0.000113746	0	0.000183616	0.00301644	0.000274108	0	0	0.00515963	0	0.0122162	3OHP
CS78916	2	Rhen-1	0.00629308	0	0	0	0	6.25829e-05	0	0	0	0	0	0	0.000226787	0.000217584	3.75881e-05	0	0.00368226	0.00038338	0	0	0.00550991	0	0.0133014	3OHP
CS78920	2	Ws-2	0.000936512	0.00119348	0	0	0	0	0	0	0	0	0	0	0.0105716	0.000124305	0	0	0.0019007	0	0	0	0.00196624	0	0.00559441	3MSO
CS78920	1	Ws-2	0.000893393	0.00106289	0	0	0	0	0	0	0	0	0	0	0.0105146	0.000107504	0	0.00012711	0.00233105	8.78281e-05	0	0	0.00227401	0	0.00702558	3MSO
CS78923	1	Kos-1	0.00116582	0	0	0	0	0.00602488	0	0.000138871	0	0	0	0	5.45751e-05	0	0	0	0.00369284	0.000485568	0	0	0.00274724	0	0.00690449	Allyl
CS78923	2	Kos-1	0.00290865	0	0	0	0	0.00594856	0	0.000102651	0	0	0	0	0.000144348	0.000121564	0.000942357	0.000188538	0.00209735	0.000292766	0	0	0.00290676	0	0.00361283	Allyl
CS78924	1	Kos-2	0.00103109	0	0	0	0	0.00554146	0	0.000142882	0	0	0	0	4.74734e-05	8.58119e-05	0	0	0.00334207	0.000417536	0	0	0.00295153	0	0.00932785	Allyl
CS78926	2	Pien	0.000374362	0	0	0.000238803	0	0.00194184	0	0.00783643	5.23577e-05	0	0	0	0	0.000353402	0.000246955	0	0.00507844	0.000440385	0	0	0.00113433	0	0.00459523	Butenyl
CS78926	1	Pien	0.000343349	0	0.000678859	0	0	0.000808415	0	0.00310533	0	0	0	0	0	0.000275137	0.000146861	0.000326016	0.00543823	0.000405783	0	0	0.00247889	0	0.00863789	Butenyl
CS78927	1	Radk-1	0.00145312	0	0	0	0	0.00674558	0	0.000205781	4.97744e-05	0	0	0	0.000530218	0.000218033	0	5.58439e-05	0.00542946	0.000454463	0	0	0.00399055	0	0.0128955	Allyl
CS78927	2	Radk-1	0.00135841	0	0	0	0	0.00965642	0	0.00023093	4.6805e-05	0	0	0	0.000327593	0.000168328	4.31065e-05	0	0.00504263	0.000418373	0	0	0.00285285	0	0.0117188	Allyl
CS78928	2	Radk-2	0.00170596	0	0	0	0	0.00649804	0	0.000196201	0	0	0	0	0.000269397	0.000242026	0.00112056	0	0.00366453	0.000465359	0	0	0.00299449	0	0.00538106	Allyl
CS78928	1	Radk-2	0.000545947	0	0	0	0.00354722	0	0	0.000135504	0	0	0	0	0.000263822	0.000280809	0	3.5843e-05	0.00506773	0.000414393	0	0	0.00332919	0	0.00905793	Allyl
CS78929	1	Samm	0.00192958	0	0.000120629	0	0	0.00317683	0	8.17464e-05	0	0	0	0	0.000254224	0.000143736	0	0	0.0042632	0.00037706	0	0	0.00513216	0	0.0119664	Allyl
CS78930	2	Shu-1	0.000816834	0	0	7.14441e-05	0	0.00233915	0	0	0	0	0	0	0.000919314	0.000168009	0	0	0.00405575	0.000906572	0	0	0.00230081	0	0.00916927	Allyl
CS78930	1	Shu-1	0.000601036	0	0	0	0	0.00152722	0	0	0	0	0	0	0.000461712	0.000203262	0	0	0.00458688	0.000481383	0	0	0.0027298	0	0.0129308	Allyl
CS78931	2	Shu-2	0.00227548	0	0	8.42723e-05	0	0.00986531	0	0.000104657	0	0	0	0	0.000356197	0.000168602	0	0.000799326	0.00328651	0.000562343	0	0	0.00366954	0	0.011085	Allyl
CS78931	1	Shu-2	0.00176315	0	0	0	0	0.00575823	0	0	0	0	0	0	0.000343718	8.59237e-05	0	0.000114735	0.0022874	0.000270322	0	0	0.00463072	0	0.00724714	Allyl
CS78939	2	OOE1-1	0.00260712	0	0	0	0	0	0	0	0	0	0	0	0.000139303	0.000242488	0	0	0.00418111	0.000356154	0	0	0.00362286	0	0.0104103	3OHP
CS78939	1	OOE1-1	0.00273442	0	0	0	0	0	0	0	0	0	0	0	0.000977714	0.000120426	0	0.000197339	0.00301726	0.000291771	0	0	0.00439317	0	0.00954988	3OHP
CS78940	1	OOE3-1	0.00149571	0	0	0	0	0	0	0	0	0	0	0	7.90276e-05	8.14035e-05	0	0.000141323	0.00161488	9.85806e-05	0	0	0.00152925	0	0.00517561	3OHP
CS78940	2	OOE3-1	0.00654928	0	0	0	0	0	0	0	0	0	0	0	0.000229901	0.000223551	4.05013e-05	0	0.00372297	4.03927e-05	0	0	0.0038924	0	0.00979269	3OHP
CS78941	2	OOE3-2	0.00361669	0	0	0	0	0.000374826	0	0	0	0	0	0	0.000147522	0.000160169	0	0	0.00264156	7.64707e-05	0	0	0.00458996	0	0.00790093	3OHP
CS78941	1	OOE3-2	0.00315338	0	0	0	0	0	0	0	0	0	0	0	0.000138283	0.000313181	0	0.000255762	0.00406326	0.000135043	0	0	0.00436348	0	0.0119438	3OHP

## Sheet: C. Heritability
Trait	Heritability (percentage of variance explained by the ecotype identity)
4MT	93.4526
4MOI3M	92.949
Branched.chained.GSL	91.718
3.Butenyl	91.7038
3MT	89.2396
7MT	88.1516
3OHP	87.9775
3MSO	87.3401
8MSO	85.4629
I3M	84.0566
BZO	83.7194
7MSO	82.8948
Allyl	82.7378
OH.3.Butenyl	81.8986
6MSO	81.0757
4OHB	74.8467
8MT	69.0451
8MTderivate	65.0118
4MSO	59.6969
4OHI3M	59.0383
4.Pentenyl	53.0928
OH.Pentenyl	44.3228
5MSO	34.6062

## Sheet: D. GSLs_data emmeans
CS	Name	Country	Latitude	Longitude	3OHP	3MSO	4OHB	2-OH-3-Butenyl	4MSO	Allyl	5MSO	3-Butenyl	Branched	OHPentenyl	4OHI3M	6MSO	3MT	7MSO	4Pentenyl	4MT	8MSO	I3M	7MT	4MOI3M	BZO	8MT	8MTder	AOP status	MAM status	GS-OH functionality	Classification_name	Geography	PC1	PC2
CS76350	Vezzano-2.2	ITA	46.6297	10.817	0.001136	7.59e-05	8.88e-06	-1.51e-05	3.46e-07	0.00257006	2.67e-07	2.92e-05	2e-05	5.38e-08	5.8e-10	1.56e-07	0.000403817	0.000348626	-3.22e-06	2.58e-05	0.00716253	0.000283457	8.76e-07	1.17e-08	0.00182978	0.0142805	9.86e-06	Alk	C3	NF	Allyl	South	1.16761	1.39487
CS76351	Rovero-1	ITA	46.2543	11.167	0.000930241	4.78e-07	6.1e-05	9.86e-05	3.46e-07	0.000812255	2.67e-07	-9.99e-07	-2.82e-07	5.38e-08	5.8e-10	1.56e-07	0.000480586	0.0001507	-3.22e-06	5.33e-05	0.00587944	0.000427599	8.76e-07	1.17e-08	0.00258379	0.014063	9.86e-06	Alk	C3	F	Allyl	South	1.22404	0.671789
CS76352	Voeran-1	ITA	46.36	11.23	0.00703178	4.78e-07	8.88e-06	-1.51e-05	4.46e-05	-1.23e-05	2.67e-07	-9.99e-07	-2.82e-07	5.38e-08	5.8e-10	1.56e-07	0.000207647	0.000161767	0.000696875	0.00019443	0.00366145	0.000247574	8.76e-07	1.17e-08	0.00449786	0.00741169	9.86e-06	OH	C3	NF	3OHP	South	2.19524	-1.68136
CS76353	Altenb-2	ITA	46.3716	11.2376	0.00132576	4.78e-07	8.88e-06	8.26e-05	3.46e-07	0.00152374	2.67e-07	-9.99e-07	2.51e-05	5.38e-08	5.8e-10	1.56e-07	0.000102886	0.000197016	-3.22e-06	7.07e-06	0.00440577	0.000402629	8.76e-07	1.17e-08	0.00175767	0.00961137	9.86e-06	Alk	C3	F	Allyl	South	1.17264	0.22492
CS76354	Mitterberg-1-181	ITA	46.366	11.2832	0.00267277	4.78e-07	6.84e-05	-1.51e-05	3.46e-07	0.00340755	2.67e-07	-9.99e-07	3.11e-05	5.38e-08	5.8e-10	1.56e-07	0.000362695	0.000196318	0.000214684	3.24e-05	0.0043123	0.00041691	8.76e-07	1.17e-08	0.00197749	0.00704434	0.00135292	Alk	C3	NF	Allyl	South	1.65445	0.483124
CS76355	Castelfed-4-212	ITA	46.3378	11.2928	0.00153035	0.000134184	8.88e-06	5.12e-05	3.46e-07	0.00657856	2.67e-07	8.4e-05	-2.82e-07	5.38e-08	5.8e-10	1.56e-07	0.00184453	0.000294649	-3.22e-06	7.61e-05	0.00527502	0.000105363	8.76e-07	1.17e-08	0.0025414	0.0143258	0.0022693	Alk	C3	F	Allyl	South	2.25869	1.74604
CS76356	Castelfed-4-213	ITA	46.3378	11.2928	0.000922616	-8.35e-06	-0.000154943	0.000263744	-6.04e-06	0.00293925	-4.66e-06	1.74e-05	4.93e-06	-9.4e-07	-1.01e-08	-2.72e-06	0.000280746	0.000229517	5.62e-05	8.51e-06	0.0015333	8.86e-05	-1.53e-05	-2.04e-07	0.00424299	0.00754489	-0.000172045	Alk	C3	NF	Allyl	South	1.79181	-1.07498
CS76357	Bozen-1.1	ITA	46.513	11.331	0.000974524	8.42e-05	8.88e-06	2.33e-05	3.46e-07	0.000594632	2.67e-07	-9.99e-07	-2.82e-07	5.38e-08	5.8e-10	1.56e-07	0.00070917	9.63e-05	-3.22e-06	6.81e-05	0.00320858	6.98e-05	8.76e-07	1.17e-08	0.002741	0.00884809	9.86e-06	Alk	C3	F	Allyl	South	1.41884	-0.970048
CS76358	Bozen-1.2	ITA	46.513	11.331	0.000915955	0.000260215	-0.000154943	0.000263744	-6.04e-06	0.00179982	-4.66e-06	1.74e-05	4.93e-06	-9.4e-07	-1.01e-08	-2.72e-06	0.00157839	9.61e-05	5.62e-05	0.000102655	0.00396665	5.63e-05	-1.53e-05	-2.04e-07	0.00401025	0.01053	-0.000172045	Alk	C3	NF	Allyl	South	2.05478	-0.809056
CS76359	Ciste-1	ITA	41.62	12.87	-5.52e-06	4.78e-07	0.000202374	0.00209947	3.46e-07	-1.23e-05	2.67e-07	-9.99e-07	0.000136686	5.38e-08	5.8e-10	3.32e-05	3.89e-06	0.000715531	-3.22e-06	0.000900326	0.0125971	0.000129818	0.000126043	1.17e-08	0.00192445	0.0187811	0.00135917	Alk	C4	F	OH-But	South	-1.63605	3.29694
CS76360	Ciste-2	ITA	41.62	12.87	-5.52e-06	4.78e-07	0.000347008	0.00143993	3.46e-07	-1.23e-05	2.67e-07	-9.99e-07	0.000179349	5.38e-08	5.8e-10	4.48e-05	5.76e-05	0.000559387	-3.22e-06	0.000741267	0.00875515	0.000402296	0.000157768	1.17e-08	0.0015291	0.0117094	9.86e-06	Alk	C4	F	OH-But	South	-1.67168	1.47097
CS76361	Monte-1	ITA	40.28	15.65	-5.52e-06	4.78e-07	0.000444911	0.00325352	3.46e-07	-1.23e-05	2.67e-07	-9.99e-07	0.000129762	5.38e-08	5.8e-10	9.16e-05	3.89e-06	0.000836598	-3.22e-06	0.000618424	0.00902912	0.000165699	0.000157137	1.17e-08	0.0013046	0.0125612	0.00335715	Alk	C4	F	OH-But	South	-2.80605	2.90531
CS76362	Angel-1	ITA	38.62	16.17	-5.52e-06	4.78e-07	0.000691698	0.00559201	3.46e-07	-1.23e-05	2.67e-07	0.000493735	8.08e-05	5.38e-08	5.8e-10	2.3e-05	4.24e-05	0.000560633	8.34e-05	0.000758503	0.00440427	0.000257471	0.000125898	1.17e-08	0.00277032	0.0100743	9.86e-06	Alk	C4	F	OH-But	South	-2.26555	-0.0556986
CS76364	Mammo-2	ITA	38.38	16.22	-5.52e-06	4.78e-07	0.00132118	0.00498995	3.46e-07	-1.23e-05	2.67e-07	0.000952764	0.000150735	5.38e-08	5.8e-10	1.8e-05	3.89e-06	0.000376261	0.000251035	0.000907878	0.00380502	0.000348826	0.000137852	1.17e-08	0.0032141	0.00996173	9.86e-06	Alk	C4	F	OH-But	South	-2.54707	-0.434281
CS76365	Mammo-1	ITA	38.36	16.23	-5.52e-06	4.78e-07	0.000949278	0.00629399	3.46e-07	-1.23e-05	2.67e-07	0.000333641	0.000228296	5.38e-08	5.8e-10	1.56e-07	0.000355388	0.000381278	0.000170268	0.00160555	0.00375796	0.000206156	8.76e-07	1.17e-08	0.00363473	0.0127573	9.86e-06	Alk	C4	F	OH-But	South	-2.07189	-0.139818
CS76366	Angit-1	ITA	38.76	16.24	-5.52e-06	4.78e-07	0.000821917	0.00418059	3.46e-07	-1.23e-05	2.67e-07	0.000598421	0.000383518	5.38e-08	5.8e-10	3.53e-05	3.89e-06	0.000366865	0.000120221	0.00257229	0.00262943	0.000191485	0.000324903	1.17e-08	0.00312977	0.0100104	9.86e-06	Alk	C4	F	OH-But	South	-3.2325	-0.789859
CS76367	Lago-1	ITA	39.18	16.26	-5.52e-06	4.78e-07	0.000513747	0.00361895	3.46e-07	-1.23e-05	2.67e-07	0.000272214	0.000501153	5.38e-08	5.8e-10	1.56e-07	3.89e-06	0.000297088	2.78e-05	0.0037689	0.00389769	0.000291258	3.16e-05	4.48e-06	0.00208987	0.0108605	9.86e-06	Alk	C4	F	OH-But	South	-2.33066	0.0159703
CS76368	Apost-1	ITA	39.01	16.47	0.000604782	4.78e-07	8.88e-06	2.67e-05	3.46e-07	0.000936664	2.67e-07	-9.99e-07	-2.82e-07	5.38e-08	5.8e-10	1.56e-07	0.000741853	0.00040492	-3.22e-06	2.76e-05	0.00906115	0.000302372	8.76e-07	1.17e-08	0.00167334	0.0141083	9.86e-06	Alk	C3	F	Allyl	South	0.747356	1.60757
CS76369	Dobra-1	SRB	44.84	20.16	0.00158228	4.78e-07	5.68e-05	-1.51e-05	3.46e-07	0.00560064	2.67e-07	-9.99e-07	2.71e-05	5.38e-08	5.8e-10	1.56e-07	0.000197358	0.000277349	0.000632879	2.23e-05	0.00423356	0.000188713	8.76e-07	1.17e-08	0.00152444	0.00717385	0.00134019	Alk	C3	NF	Allyl	South	1.62235	1.21942
CS76370	Petro-1	SRB	44.34	21.46	0.00134602	4.78e-07	8.88e-06	-1.51e-05	3.46e-07	0.00217382	2.67e-07	-9.99e-07	-2.82e-07	5.38e-08	5.8e-10	1.56e-07	0.00046379	0.000171037	0.000415592	0.000138256	0.00409668	0.000444823	8.76e-07	1.17e-08	0.0017869	0.00893392	9.86e-06	Alk	C3	NF	Allyl	South	1.38447	0.386149
CS76371	Lecho-1	BUL	41.43	23.5	0.000401152	4.78e-07	0.000838923	0.00476439	3.46e-07	0.0016288	2.67e-07	0.000604126	-2.82e-07	5.38e-08	5.8e-10	4.64e-05	2.21e-05	0.000388558	0.000219167	0.000409529	0.00418295	0.000446708	3.14e-05	1.17e-08	0.00373652	0.00774993	9.86e-06	Alk	C4	F	OH-But	South	-1.39276	-0.311416
CS76372	Jablo-1	BUL	41.59	25.2	9.63e-05	-8.35e-06	0.000795441	0.00219475	-6.04e-06	0.000215467	-4.66e-06	0.00126782	0.000288728	-9.4e-07	-1.01e-08	-2.72e-06	-6.79e-05	0.000355136	5.62e-05	0.00157764	0.00500828	0.000258783	-1.53e-05	-2.04e-07	0.00290315	0.0106059	-0.000172045	Alk	C4	F	OH-But	South	-1.42765	0.16425
CS76373	Bolin-1	ROU	44.46	25.74	0.000626155	4.78e-07	8.88e-06	1.41e-05	3.46e-07	0.000921075	2.67e-07	-9.99e-07	-2.82e-07	5.38e-08	5.8e-10	1.56e-07	9.29e-05	0.000176951	-3.22e-06	7.07e-06	0.00347864	0.000454545	8.76e-07	1.17e-08	0.00244639	0.010732	9.86e-06	Alk	C3	F	Allyl	South	1.14204	0.0609174
CS76374	Shigu-2	RUS	53.33	49.48	0.00140703	4.78e-07	5.03e-05	-1.51e-05	3.46e-07	0.00141704	2.67e-07	-9.99e-07	-2.82e-07	5.38e-08	5.8e-10	1.32e-05	2.74e-05	0.000367889	-3.22e-06	7.07e-06	0.00626092	0.000249773	8.76e-07	1.17e-08	0.00299739	0.00745559	9.86e-06	Alk	C3	NF	Allyl	North	0.845209	-0.0853297
CS76375	Shigu-1	RUS	53.33	49.48	0.000821183	4.78e-07	8.88e-06	-1.51e-05	3.46e-07	0.00149881	2.67e-07	-9.99e-07	-2.82e-07	5.38e-08	5.8e-10	1.56e-07	8.12e-05	0.000206831	0.000502499	3.62e-05	0.00618984	0.000681146	8.76e-07	1.17e-08	0.00181626	0.00821274	0.00107856	Alk	C3	NF	Allyl	North	1.00736	1.38635
CS76387	Xan-1	AZE	38.6536	48.7992	0.00516218	-8.35e-06	-6.74e-05	0.000263744	-6.04e-06	0.000215467	-4.66e-06	1.74e-05	4.93e-06	-9.4e-07	-1.01e-08	-2.72e-06	0.00191306	2.33e-05	5.62e-05	-6.42e-05	0.000914895	0.000229001	-1.53e-05	-2.04e-07	0.0081494	0.00804799	-0.000172045	OH	C3	NF	3OHP	North	2.9167	-3.34656
CS76388	Lerik1-3	AZE	38.7406	48.6131	0.00908789	9.04e-05	0.000184455	0.000263744	-6.04e-06	0.000215467	-4.66e-06	1.74e-05	4.93e-06	-9.4e-07	-1.01e-08	-2.72e-06	0.0031899	0.000211847	5.62e-05	0.000150719	0.00238676	0.000218859	-1.53e-05	-2.04e-07	0.00728617	0.0084378	-0.000172045	OH	C3	NF	3OHP	North	3.24216	-3.54162
CS76390	Lag2-2	GEO	41.8296	46.2831	0.00285299	4.78e-07	0.0009568	-1.51e-05	9.8e-05	-1.23e-05	2.67e-07	-9.99e-07	-2.82e-07	5.38e-08	5.8e-10	1.56e-07	0.000657732	0.000164423	-3.22e-06	0.00240181	0.00512752	9.71e-05	8.76e-07	1.17e-08	0.00375518	0.013928	9.86e-06	MSO	C3	NF	3MSO	South	0.593433	-1.21969
CS76392	Bak-2	GEO	41.7942	43.4767	0.000596876	-8.35e-06	0.00019536	0.000871234	-6.04e-06	0.00147285	-4.66e-06	1.74e-05	6.63e-05	-9.4e-07	-1.01e-08	-2.72e-06	-1.34e-05	5.49e-05	5.62e-05	-6.88e-05	0.00417919	0.000127749	-1.53e-05	-2.04e-07	0.0032035	0.0106937	-0.000172045	Alk	C3	F	Allyl	South	1.18159	-0.267797
CS76394	Yeg-1	ARM	39.8692	45.3622	0.000434335	4.78e-07	0.000861573	0.00125043	3.46e-07	0.00139719	2.67e-07	0.00160231	-2.82e-07	5.38e-08	5.8e-10	1.56e-07	3.89e-06	0.00025977	3.68e-05	0.000800097	0.00336888	0.000219699	8.76e-07	1.17e-08	0.00245453	0.00692794	9.86e-06	Alk	C4	F	OH-But	South	-0.418622	-0.83147
CS76400	Star-8	GER	48.43	8.82	0.000334312	4.78e-07	0.00190013	-1.51e-05	0.000127561	-1.23e-05	2.67e-07	-9.99e-07	-2.82e-07	5.38e-08	5.8e-10	1.56e-07	3.89e-06	0.000302695	-3.22e-06	0.0026978	0.00280806	0.000209759	0.000326216	1.17e-08	0.00305434	0.00550236	9.86e-06	MSO	C4	NF	4MSO	North	-1.73137	-2.66995
CS76402	Nie1-2	GER	48.52	8.8	0.00189595	0.000154817	-0.000154943	0.000263744	0.000583092	0.000215467	-4.66e-06	1.74e-05	4.93e-06	-9.4e-07	-1.01e-08	-2.72e-06	0.0022631	0.000132658	5.62e-05	-0.000123379	0.00432317	2.38e-05	-1.53e-05	-2.04e-07	0.00492976	0.00908687	-0.000172045	MSO	C3	NF	3MSO	North	1.69759	-2.05432
CS76403	TueSB30-3	GER	48.53	9.06	0.00205542	7.6e-05	6.88e-05	5.92e-05	3.46e-07	0.00167719	2.67e-07	-9.99e-07	-2.82e-07	5.38e-08	5.8e-10	1.56e-07	0.000830233	0.000174109	-3.22e-06	3.81e-05	0.00408156	0.000244641	8.76e-07	1.17e-08	0.00448959	0.0105478	9.86e-06	Alk	C3	F	Allyl	North	1.72501	-0.825217
CS76404	HKT2.4	GER	48.14	9.4	0.00149397	4.78e-07	8.88e-06	-1.51e-05	3.46e-07	0.00123985	2.67e-07	-9.99e-07	-2.82e-07	5.38e-08	5.8e-10	1.56e-07	0.000689283	0.000108543	-3.22e-06	0.000104214	0.00411187	0.000224014	8.76e-07	1.17e-08	0.00375438	0.00996002	9.86e-06	Alk	C3	NF	Allyl	North	1.60812	-0.719455
CS76405	TueWa1-2	GER	48.53	9.04	7.16e-05	4.78e-07	0.00104855	0.00337365	3.46e-07	-1.23e-05	2.67e-07	3.14e-05	0.00018555	5.38e-08	5.8e-10	7.22e-05	3.89e-06	0.000669385	9.23e-05	0.00366711	0.0045908	0.00018037	0.0004663	1.17e-08	0.00351854	0.00798923	9.86e-06	Alk	C4	F	OH-But	North	-3.9265	-1.189
CS76406	Rue3-1-31	GER	48.56	9.16	0.00209281	-8.35e-06	-6.21e-05	0.000263744	-6.04e-06	0.00332309	-4.66e-06	1.74e-05	4.93e-06	-9.4e-07	-1.01e-08	-2.72e-06	0.000196094	0.000221537	5.62e-05	-0.000123379	0.00504336	0.000345824	-1.53e-05	-2.04e-07	0.00407611	0.0101633	-0.000172045	Alk	C3	NF	Allyl	North	1.93579	0.0154287
CS76407	TueV-13	GER	48.52	9.05	0.000180091	4.78e-07	0.00156905	0.00429262	3.46e-07	-1.23e-05	2.67e-07	-9.99e-07	0.000277874	5.38e-08	5.8e-10	0.000107824	3.89e-06	0.000829904	6.98e-05	0.00117877	0.00465065	0.000309117	0.000442693	1.17e-08	0.00428938	0.00861989	9.86e-06	Alk	C4	F	OH-But	North	-4.72307	-0.736855
CS76410	Cdm-0	ESP	39.73	-5.74	-0.000107343	9.31e-06	0.000172697	0.00364941	6.73e-06	-0.000240156	5.19e-06	0.00305723	8.96e-05	1.05e-06	1.13e-08	8.84e-05	0.000203211	0.000570004	-6.26e-05	0.00426377	0.0046571	0.000182545	0.000877493	2.28e-07	0.00358055	0.0146077	0.000191759	Alk	C4	F	OH-But	South	-5.10898	-0.764979
CS76411	Don-0	ESP	36.83	-6.36	0.000250902	9.31e-06	0.000172697	0.00136922	6.73e-06	0.00134511	5.19e-06	0.000481322	3.34e-05	1.05e-06	1.13e-08	3.03e-06	7.57e-05	0.000525444	-2.07e-06	0.00176987	0.00886606	8.04e-05	1.7e-05	2.28e-07	0.00197903	0.0118319	0.000191759	Alk	C4	F	OH-But	South	-0.567089	1.05946
CS76412	Fei-0	POR	40.92	-8.54	7.72e-05	4.78e-07	0.00131439	0.00305854	3.46e-07	-1.23e-05	2.67e-07	5.06e-05	0.00024531	5.38e-08	5.8e-10	8.14e-05	3.89e-06	0.000811278	0.00012744	0.00157402	0.00878869	0.000311611	0.000384339	1.17e-08	0.00269043	0.00778519	9.86e-06	Alk	C4	F	OH-But	South	-4.15215	0.315543
CS76413	Leo-1	ESP	41.8	-3.11	0.000492105	-8.35e-06	-0.000154943	0.000263744	-6.04e-06	0.000924328	-4.66e-06	1.74e-05	4.93e-06	-9.4e-07	1.49e-05	-2.72e-06	0.000123151	0.000203123	5.62e-05	-0.000123379	0.00839389	0.000235939	-1.53e-05	-2.04e-07	0.00162792	0.0159383	0.00287333	Alk	C3	NF	Allyl	South	1.03175	3.66121
CS76414	Mer-6	ESP	38.92	-6.34	9.63e-05	-8.35e-06	0.00116637	0.00143421	-6.04e-06	0.000215467	-4.66e-06	0.00140717	7.94e-05	-9.4e-07	-1.01e-08	5.34e-05	-6.79e-05	0.000553022	0.00143228	0.0007532	0.00626187	0.000372901	0.000458267	-2.04e-07	0.00150533	0.015058	0.00457704	Alk	C4	F	OH-But	South	-2.9638	3.45405
CS76416	Pra-6	ESP	41.05	-3.54	0.00103533	-8.35e-06	-0.000154943	0.000263744	-6.04e-06	0.00162311	-4.66e-06	1.74e-05	6.68e-05	-9.4e-07	-1.01e-08	-2.72e-06	0.000231886	0.00021367	5.62e-05	-8.69e-05	0.00719351	0.000318458	-1.53e-05	-2.04e-07	0.00409771	0.0129052	-0.000172045	Alk	C3	NF	Allyl	South	1.42604	0.7087
CS76417	Qui-0	ESP	42.69	-6.93	0.000132202	4.78e-07	0.000213013	0.00205519	3.46e-07	0.000120967	2.67e-07	0.000207637	-2.82e-07	5.38e-08	5.8e-10	4.94e-05	7.89e-05	0.000514431	4.44e-05	0.00295186	0.00594964	0.00033027	0.000184137	1.17e-08	0.00208849	0.00982227	9.86e-06	Alk	C4	F	OH-But	South	-1.61081	0.0853846
CS76418	Vie-0	ESP	42.63	0.76	0.000560055	4.78e-07	8.88e-06	-1.51e-05	3.46e-07	0.0023119	2.67e-07	-9.99e-07	8.74e-05	5.38e-08	5.8e-10	1.56e-07	0.000943885	0.000267736	0.00043009	7.07e-06	0.00731727	0.000542106	8.76e-07	1.17e-08	0.000929616	0.0117488	0.00115764	Alk	C3	NF	Allyl	South	0.901686	2.30169
CS76419	Slavi-1	BUL	41.43	23.65	0.00107354	4.78e-07	9.18e-05	0.000145621	0.000134166	0.00178315	2.67e-07	-9.99e-07	-2.82e-07	5.38e-08	5.8e-10	1.56e-07	0.000423421	0.000177599	-3.22e-06	7.07e-06	0.0032772	0.000677551	8.76e-07	1.17e-08	0.00382313	0.00866106	9.86e-06	Alk	C3	F	Allyl	South	1.26321	-0.491733
CS76420	Copac-1	ROU	46.11	21.95	0.00318805	4.78e-07	9.38e-05	7.43e-05	3.46e-07	0.00399001	2.67e-07	-9.99e-07	4.48e-05	5.38e-08	5.8e-10	1.56e-07	0.000180877	0.000264345	-3.22e-06	7.07e-06	0.00432332	0.000383045	8.76e-07	1.17e-08	0.00209459	0.0106824	9.86e-06	Alk	C3	F	Allyl	South	1.72173	0.368618
CS76421	Borsk-2	RUS	53.04	51.75	0.00161847	4.78e-07	6.09e-05	7.92e-05	3.46e-07	0.0020099	2.67e-07	3.13e-05	-2.82e-07	5.38e-08	5.8e-10	1.56e-07	0.000326527	0.000244748	-3.22e-06	7.07e-06	0.00539162	0.000364571	8.76e-07	1.17e-08	0.00279409	0.0121819	9.86e-06	Alk	C3	F	Allyl	North	1.3584	0.417446
CS76423	Galdo-1	ITA	40.57	15.32	-5.52e-06	4.78e-07	0.000799713	0.00432004	3.46e-07	-1.23e-05	2.67e-07	9.22e-05	0.000171639	5.38e-08	5.8e-10	5.01e-05	2.08e-05	0.000745711	4.88e-05	0.000527846	0.0105932	0.000300439	0.000163824	1.17e-08	0.00223721	0.0110443	9.86e-06	Alk	C4	F	OH-But	South	-2.91325	1.49991
CS76424	Timpo-1	ITA	39.27	16.27	-5.52e-06	4.78e-07	0.000538886	0.00295391	3.46e-07	-1.23e-05	2.67e-07	0.000236716	3.98e-05	5.38e-08	5.8e-10	1.56e-07	3.89e-06	0.000337528	-3.22e-06	0.0026259	0.00358163	0.000214413	0.000248851	1.17e-08	0.00184774	0.0103144	9.86e-06	Alk	C4	F	OH-But	South	-1.48717	-0.6842
CS76425	Valsi-1	ITA	40.18	16.45	0.000229598	4.78e-07	0.000785877	0.00515194	3.46e-07	0.000140346	2.67e-07	0.000368232	0.000117708	5.38e-08	1.25e-05	1.77e-05	3.89e-06	0.000479669	-3.22e-06	0.0010659	0.00548209	0.000203141	0.000105381	1.17e-08	0.00348714	0.0106564	9.86e-06	Alk	C4	F	OH-But	South	-2.19009	0.507338
CS76428	Aa-0	GER	50.9167	9.57073	0.000327508	4.78e-07	0.0013856	-1.51e-05	0.000502767	-1.23e-05	3.12e-05	-9.99e-07	3.75e-05	5.38e-08	5.8e-10	4.02e-05	3.89e-06	0.000369489	-3.22e-06	0.00635536	0.00251784	0.00045209	0.000447534	1.17e-08	0.00223801	0.00565618	9.86e-06	MSO	C4	NF	4MSO	North	-3.62449	-3.19498
CS76430	Ag-0	FRA	45	1.3	-5.52e-06	4.78e-07	0.000446587	0.003833	3.46e-07	-1.23e-05	2.67e-07	0.000189886	0.000332049	5.38e-08	5.8e-10	0.00010331	3.89e-06	0.000688273	0.000169522	0.00134413	0.00562954	0.000229424	0.000410937	1.17e-08	0.00379038	0.00997466	9.86e-06	Alk	C4	F	OH-But	North	-3.82165	0.142618
CS76431	Ak-1	GER	48.0683	7.62551	0.000216024	4.78e-07	0.00139573	-1.51e-05	0.000230601	-1.23e-05	2.67e-07	-9.99e-07	-2.82e-07	5.38e-08	5.8e-10	4.17e-05	3.89e-06	0.000440607	-3.22e-06	0.00763789	0.00463491	0.000188526	0.000579587	1.17e-08	0.00300799	0.00666315	9.86e-06	MSO	C4	NF	4MSO	North	-3.42349	-2.80081
CS76432	Alst-1	UK	54.8	-2.4333	-5.52e-06	4.78e-07	0.000607721	0.00488915	3.46e-07	-1.23e-05	4.96e-05	5.34e-05	0.000253382	5.38e-08	5.8e-10	0.000145422	3.89e-06	0.00046732	0.000177193	0.00137947	0.00248791	0.000271174	0.000263104	1.17e-08	0.00258119	0.00567685	9.86e-06	Alk	C4	F	OH-But	North	-4.57876	-1.37288
CS76434	Amel-1	NED	53.448	5.73	0.000847988	4.78e-07	8.88e-06	2e-05	3.46e-07	0.0032658	2.67e-07	-9.99e-07	-2.82e-07	5.38e-08	5.8e-10	1.56e-07	6.77e-05	0.000363515	-3.22e-06	7.07e-06	0.00878146	0.000570283	8.76e-07	1.17e-08	0.00127723	0.00976145	0.00145786	Alk	C3	F	Allyl	North	0.995407	2.21244
CS76435	An-1	BEL	51.2167	4.4	0.000312004	-8.35e-06	0.00214163	0.00263972	-6.04e-06	0.000215467	-4.66e-06	0.000240512	4.93e-06	-9.4e-07	-1.01e-08	-2.72e-06	-6.79e-05	0.000191843	0.000145299	0.00114659	0.00171671	0.000161826	0.000255423	-2.04e-07	0.00356236	0.00807218	-0.000172045	Alk	C4	F	OH-But	North	-1.62831	-2.31423
CS76436	Ang-0	BEL	50.3	5.3	0.00032226	4.78e-07	0.00101654	0.00230734	3.46e-07	-1.23e-05	2.67e-07	-9.99e-07	0.000105295	5.38e-08	5.8e-10	9.63e-05	4.02e-05	0.000774943	3.22e-05	0.00143526	0.00558051	0.000323181	0.000285112	1.17e-08	0.0038358	0.0112749	9.86e-06	Alk	C4	F	OH-But	North	-3.02482	-0.0894288
CS76439	Anz-0	IRN	37.47	49.47	0.00476656	4.78e-07	0.000113821	7.85e-05	3.46e-07	-1.23e-05	2.67e-07	-9.99e-07	-2.82e-07	5.38e-08	5.8e-10	1.56e-07	0.000860517	0.000160938	-3.22e-06	0.00033992	0.00212266	0.000126894	8.76e-07	1.17e-08	0.00710262	0.0076011	9.86e-06	OH	C3	F	3OHP	North	2.06925	-2.95969
CS76440	Appt-1	NED	51.8333	5.5833	-5.52e-06	4.78e-07	0.000206045	0.00153472	3.46e-07	-1.23e-05	2.67e-07	0.000157235	0.000489698	5.38e-08	5.8e-10	1.56e-07	3.89e-06	0.00069508	0.0001727	0.000748003	0.005718	0.000513783	6.3e-05	1.17e-08	0.00243989	0.0113743	9.86e-06	Alk	C4	F	OH-But	North	-1.8561	1.56914
CS76441	Ba-1	UK	56.5459	-4.79821	0.000897865	4.78e-07	8.88e-06	-1.51e-05	3.46e-07	0.00127118	2.67e-07	-9.99e-07	-2.82e-07	5.38e-08	5.8e-10	1.56e-07	0.000983076	0.000213478	0.000371841	7.07e-06	0.00443811	0.000117656	8.76e-07	1.17e-08	0.000749497	0.00950503	9.86e-06	Alk	C3	NF	Allyl	North	1.16635	0.346106
CS76442	Baa-1	NED	51.3333	6.1	0.00087929	0.00116707	8.88e-06	-1.51e-05	3.46e-07	-1.23e-05	2.67e-07	-9.99e-07	-2.82e-07	5.38e-08	5.8e-10	1.56e-07	0.00641512	0.000100249	-3.22e-06	6.37e-05	0.00293518	0.000331249	8.76e-07	1.17e-08	0.00221266	0.0089489	9.86e-06	MSO	C3	NF	3MSO	North	2.36342	-1.75797
CS76444	Bch-1	GER	49.5166	9.3166	0.00026504	4.78e-07	0.00014608	-1.51e-05	0.000491447	-1.23e-05	2.67e-07	-9.99e-07	9.64e-05	5.38e-08	5.8e-10	1.56e-07	3.44e-05	0.000233091	-3.22e-06	0.00969061	0.00280808	0.000332458	0.000214808	3.23e-06	0.00142862	0.00349757	9.86e-06	MSO	C4	NF	4MSO	North	-1.93753	-2.76898
CS76447	Benk-1	NED	52	5.675	0.0023791	4.78e-07	8.88e-06	-1.51e-05	3.46e-07	-1.23e-05	2.67e-07	-9.99e-07	-2.82e-07	5.38e-08	5.8e-10	1.56e-07	0.000100168	0.000216149	0.000725689	0.000104518	0.00373037	0.000438451	8.76e-07	1.17e-08	0.00267788	0.0101075	0.00125103	OH	C3	NF	3OHP	North	1.20558	0.552406
CS76449	Bik-1	LBN	33.92	35.7	0.000613678	3.42e-06	0.000197226	0.000477486	2.47e-06	0.00173383	1.91e-06	0.00205213	4.07e-05	1.92e-05	4.15e-09	1.11e-06	0.000114286	0.000776982	0.000252539	0.000186593	0.0115874	0.000261752	6.27e-06	8.37e-08	0.00184227	0.0103872	0.000820769	Alk	C4	F	OH-But	South	-1.20562	2.52592
CS76450	Bl-1	ITA	44.5041	11.3396	0.00154767	4.78e-07	8.88e-06	-1.51e-05	3.46e-07	-1.23e-05	2.67e-07	-9.99e-07	-2.82e-07	5.38e-08	5.8e-10	1.56e-07	0.00120157	0.000157863	-3.22e-06	0.000156305	0.0045747	9.03e-05	8.76e-07	1.17e-08	0.00376916	0.0132366	9.86e-06	MSO	C3	NF	3MSO	South	1.47678	-0.560782
CS76451	Bla-1	ESP	41.6833	2.8	3.65e-05	4.78e-07	0.000836106	0.00279917	3.46e-07	-1.23e-05	2.67e-07	9.76e-05	0.000326812	5.38e-08	5.8e-10	6e-05	3.89e-06	0.000793455	-3.22e-06	0.0012473	0.0069002	0.000129987	2.97e-05	3.29e-06	0.00103682	0.00752307	0.00116876	Alk	C4	F	OH-But	South	-2.99413	1.122
CS76452	Boot-1	UK	54.4	-3.2667	-5.52e-06	4.78e-07	0.00151225	0.00480378	3.46e-07	-1.23e-05	2.67e-07	0.000158043	0.000206741	5.38e-08	5.8e-10	0.000123402	3.89e-06	0.00068489	0.000242107	0.00318329	0.00370164	0.000197764	0.000563873	1.17e-08	0.00409149	0.009161	9.86e-06	Alk	C4	F	OH-But	North	-5.18211	-1.29876
CS76453	Bor-1	CZE	49.4013	16.2326	0.00376913	4.78e-07	8.88e-06	-1.51e-05	3.46e-07	-1.23e-05	2.67e-07	-9.99e-07	-2.82e-07	5.38e-08	5.8e-10	1.56e-07	0.000545951	0.000172266	-3.22e-06	0.000116274	0.00347926	0.000246177	8.76e-07	1.17e-08	0.0046119	0.0103499	9.86e-06	OH	C3	NF	3OHP	North	1.78732	-1.38207
CS76454	Bor-4	CZE	49.4013	16.2326	0.00294715	4.78e-07	8.88e-06	-1.51e-05	3.46e-07	-1.23e-05	2.67e-07	-9.99e-07	-2.82e-07	5.38e-08	5.8e-10	1.56e-07	7.54e-05	0.000169561	-3.22e-06	7.19e-05	0.00345143	0.000227894	8.76e-07	1.17e-08	0.00378253	0.00819453	9.86e-06	OH	C3	NF	3OHP	North	1.49837	-1.29922
CS76455	Br-0	CZE	49.2	16.6166	3.98e-05	4.78e-07	0.00060172	0.00315132	3.46e-07	-1.23e-05	2.67e-07	0.000104106	9.01e-05	5.38e-08	5.8e-10	7.49e-05	2.41e-05	0.000549553	-3.22e-06	0.000805866	0.00491247	0.000398948	0.00016289	1.17e-08	0.00299355	0.00965496	9.86e-06	Alk	C4	F	OH-But	North	-2.1363	0.0254953
CS76457	Bsch-0	GER	50.0167	8.6667	0.00040155	4.78e-07	0.00227437	-1.51e-05	0.000279469	-1.23e-05	2.67e-07	-9.99e-07	2.35e-05	5.38e-08	5.8e-10	1.76e-05	3.89e-06	0.000492776	-3.22e-06	0.00369229	0.00288451	0.000298416	0.000358877	1.17e-08	0.00328435	0.00624313	9.86e-06	MSO	C4	NF	4MSO	North	-2.77681	-2.74228
CS76459	Ca-0	GER	50.2981	8.26607	0.000232049	4.78e-07	0.000546223	-1.51e-05	0.000251295	-1.23e-05	2.67e-07	-9.99e-07	-2.82e-07	5.38e-08	5.8e-10	1.56e-07	3.89e-06	0.000173689	-3.22e-06	0.00604388	0.00214725	0.000228218	0.000399174	1.17e-08	0.00288284	0.00746373	9.86e-06	MSO	C4	NF	4MSO	North	-1.37409	-2.63079
CS76460	Cal-0	UK	53.2699	-1.64293	0.000273537	4.78e-07	0.00023946	0.000902062	3.46e-07	0.000386476	2.67e-07	0.000682804	0.000288202	3.24e-05	5.8e-10	4.81e-05	2.61e-05	0.000664118	0.000249721	0.00152262	0.00489733	0.000217729	8.76e-07	3.53e-06	0.00199159	0.0110557	0.00193971	Alk	C4	F	OH-But	North	-2.1875	1.66089
CS76462	Cerv-1	ITA	42	12.1	3.66e-05	4.78e-07	0.000649807	0.0046836	3.46e-07	-1.23e-05	2.67e-07	0.00011278	0.000100899	5.38e-08	1.81e-05	2.14e-05	3.89e-06	0.000432333	-3.22e-06	0.000807913	0.00638257	0.000352931	0.000171196	1.17e-08	0.00218719	0.00981349	9.86e-06	Alk	C4	F	OH-But	South	-2.23556	1.27546
CS76463	Chat-1	FRA	48.0717	1.33867	0.0015284	0.00030217	8.88e-06	-1.51e-05	3.46e-07	0.000849253	2.67e-07	-9.99e-07	-2.82e-07	5.38e-08	5.8e-10	1.56e-07	0.00234307	0.00014109	-3.22e-06	7.07e-06	0.00361878	0.000223025	8.76e-07	1.17e-08	0.00313956	0.01008	9.86e-06	Alk	C3	NF	Allyl	North	1.81042	-0.959769
CS76464	Chi-0	RUS	53.7502	34.7361	0.00149352	0.000190952	8.88e-06	-1.51e-05	3.46e-07	-1.23e-05	2.67e-07	-9.99e-07	-2.82e-07	5.38e-08	5.8e-10	1.56e-07	0.00287833	9.22e-05	-3.22e-06	0.000116382	0.00359189	3.69e-05	8.76e-07	1.17e-08	0.00296593	0.010496	9.86e-06	MSO	C3	NF	3MSO	North	1.79199	-1.25725
CS76467	Cnt-1	UK	51.3	1.1	-5.52e-06	4.78e-07	0.000340803	0.0048301	3.46e-07	-1.23e-05	2.67e-07	9.4e-05	0.000451577	5.38e-08	5.8e-10	7.69e-05	3.89e-06	0.000469398	0.000130271	0.00108989	0.00479374	0.000116033	6.5e-05	1.17e-08	0.00169224	0.00867759	9.86e-06	Alk	C4	F	OH-But	North	-2.93059	0.609682
CS76468	Co-1	POR	40.12	-8.25	0.000151618	4.78e-07	0.000815431	0.00144471	3.46e-07	-1.23e-05	2.67e-07	0.000232298	-2.82e-07	5.38e-08	5.8e-10	1.56e-07	0.000741005	0.000361068	7.96e-05	0.00200239	0.00429869	0.000153308	0.000276842	1.17e-08	0.0011065	0.00729401	0.0016879	Alk	C4	F	OH-But	South	-1.24856	-0.406061
CS76469	Com-1	FRA	49.416	2.823	0.00011512	4.78e-07	0.000933176	0.00327527	3.46e-07	-1.23e-05	2.67e-07	-9.99e-07	0.000247206	5.38e-08	5.8e-10	8.87e-05	3.89e-06	0.000686343	0.000115862	0.00106804	0.00337745	0.000318263	0.000302385	1.17e-08	0.00299828	0.0083513	9.86e-06	Alk	C4	F	OH-But	North	-3.36765	-0.389459
CS76470	Da(1)-12	CZE	0	0	0.00361536	4.78e-07	8.88e-06	1.89e-05	3.46e-07	-1.23e-05	2.67e-07	-9.99e-07	-2.82e-07	5.38e-08	5.8e-10	1.56e-07	0.000270084	8.88e-05	-3.22e-06	7.07e-06	0.00168583	0.000130014	8.76e-07	4.7e-06	0.00466356	0.00907834	9.86e-06	OH	C3	F	3OHP	North	1.84458	-2.1394
CS76471	Db-1	GER	50.3058	8.32213	0.00192171	4.78e-07	6.55e-05	-1.51e-05	3.46e-07	0.00276092	2.67e-07	-9.99e-07	-2.82e-07	5.38e-08	5.8e-10	1.36e-05	0.000180299	0.000284587	-3.22e-06	7.07e-06	0.00518561	0.000380068	8.76e-07	1.17e-08	0.00220804	0.00751818	9.86e-06	Alk	C3	NF	Allyl	North	1.23489	0.0774995
CS76472	Di-G	FRA	47.3239	5.04278	0.00568455	4.78e-07	8.88e-06	-1.51e-05	3.46e-07	-1.23e-05	2.67e-07	-9.99e-07	-2.82e-07	5.38e-08	5.8e-10	1.56e-07	0.000661552	0.000138575	-3.22e-06	0.000100993	0.00423328	-6.1e-07	8.76e-07	1.17e-08	0.00568042	0.0120092	9.86e-06	OH	C3	NF	3OHP	North	2.31066	-1.87065
CS76474	Do-0	GER	50.7224	8.2372	0.00230887	4.78e-07	8.88e-06	-1.51e-05	3.46e-07	0.002584	2.67e-07	-9.99e-07	6.39e-05	5.38e-08	5.8e-10	1.56e-07	0.000269805	0.000192814	0.000293679	1.97e-05	0.00412048	0.00036406	8.76e-07	1.17e-08	0.00295944	0.00797001	0.0011906	Alk	C3	NF	Allyl	North	1.51366	0.285749
CS76476	Dra-0	CZE	49.4167	16.2667	0.0035637	4.78e-07	8.88e-06	-1.51e-05	3.46e-07	-1.23e-05	2.67e-07	-9.99e-07	-2.82e-07	5.38e-08	5.8e-10	1.56e-07	0.000260921	8e-05	-3.22e-06	7.07e-06	0.0016722	0.000131709	8.76e-07	6.38e-06	0.00504069	0.0101533	9.86e-06	OH	C3	NF	3OHP	North	1.87758	-2.15075
CS76477	Durh-1	UK	54.7761	-1.5733	0.000169366	4.78e-07	0.00178284	0.00442273	3.46e-07	-1.23e-05	2.67e-07	5.98e-05	0.000261442	5.38e-08	5.8e-10	7.02e-05	3.89e-06	0.000379798	9.8e-05	0.00185747	0.00302124	0.000117603	0.000412588	1.17e-08	0.00421725	0.00894974	9.86e-06	Alk	C4	F	OH-But	North	-3.81116	-1.7607
CS76478	Ei-2	GER	50.3	6.3	0.00199906	4.78e-07	8.88e-06	2.54e-05	3.46e-07	0.00240699	2.67e-07	-9.99e-07	4.85e-05	2.03e-05	5.8e-10	1.56e-07	0.000198479	0.000334093	-3.22e-06	7.07e-06	0.00671291	0.000418803	8.76e-07	1.17e-08	0.0032361	0.0114883	9.86e-06	Alk	C3	F	Allyl	North	0.949579	0.705254
CS76479	El-0	GER	51.5105	9.68253	0.0019925	9.2e-05	8.88e-06	-1.51e-05	3.46e-07	0.00128254	2.67e-07	-9.99e-07	-2.82e-07	5.38e-08	5.8e-10	1.56e-07	0.0015596	0.000165013	-3.22e-06	7.07e-06	0.00411814	0.000197718	8.76e-07	1.17e-08	0.0052419	0.0136387	9.86e-06	Alk	C3	NF	Allyl	North	1.93991	-0.77799
CS76480	Ema-1	UK	51.3	0.5	-5.52e-06	4.78e-07	0.001059	0.00370993	3.46e-07	-1.23e-05	2.67e-07	0.000101886	0.000172158	5.38e-08	5.8e-10	0.000246728	3.89e-06	0.000772701	0.0003161	0.000512836	0.00607047	0.000368866	0.000173519	1.17e-08	0.00260925	0.0139751	9.86e-06	Alk	C4	F	OH-But	North	-4.58228	1.50993
CS76481	En-2	GER	50	8.5	0.000215988	4.78e-07	0.00118156	-1.51e-05	0.000304345	-1.23e-05	2.67e-07	-9.99e-07	-2.82e-07	5.38e-08	7.25e-06	1.56e-07	3.13e-05	0.000237253	-3.22e-06	0.00860334	0.00351694	0.000270206	0.000347667	1.17e-08	0.00288508	0.0071718	9.86e-06	MSO	C4	NF	4MSO	North	-2.3523	-2.47795
CS76482	En-D	GER	50	8.5	0.00316783	4.78e-07	8.88e-06	-1.51e-05	3.46e-07	-1.23e-05	2.67e-07	-9.99e-07	-2.82e-07	5.38e-08	5.8e-10	1.56e-07	0.00020278	9.92e-05	-3.22e-06	0.000155575	0.00255936	0.00022366	8.76e-07	5.87e-06	0.00657499	0.0105454	9.86e-06	OH	C3	NF	3OHP	North	1.82802	-2.1602
CS76484	Es-0	FIN	60.1997	24.5682	0.000949887	-8.35e-06	-0.000154943	0.000263744	-6.04e-06	0.00161183	-4.66e-06	1.74e-05	4.93e-06	-9.4e-07	-1.01e-08	-2.72e-06	0.000287583	0.000338078	5.62e-05	-6.42e-05	0.00473156	0.000177435	-1.53e-05	-2.04e-07	0.00418534	0.00942209	-0.000172045	Alk	C3	NF	Allyl	North	1.38038	-0.2711
CS76485	Est	EST	58.6656	24.9871	0.0042919	4.78e-07	8.88e-06	-1.51e-05	3.46e-07	-1.23e-05	2.67e-07	-9.99e-07	-2.82e-07	5.38e-08	5.8e-10	1.56e-07	0.000642179	0.000161072	-3.22e-06	0.000607017	0.00403123	0.000306252	2.13e-05	1.17e-08	0.00487472	0.0102509	9.86e-06	OH	C3	NF	3OHP	North	1.78538	-1.48873
CS76486	Et-0	FRA	44.6447	2.56481	-5.52e-06	4.78e-07	0.000229008	0.00303491	3.46e-07	-1.23e-05	2.67e-07	6.5e-05	0.000262892	5.38e-08	5.8e-10	0.000169062	3.89e-06	0.00135217	7.59e-05	0.000221255	0.0123265	0.000211835	5.82e-05	1.17e-08	0.00235628	0.010664	9.86e-06	Alk	C4	F	OH-But	North	-4.21003	2.91326
CS76487	Etna-2	ITA	37.69	14.98	0.00117238	4.78e-07	8.88e-06	8.95e-05	3.46e-07	0.00191739	2.67e-07	-9.99e-07	2.83e-05	5.38e-08	5.8e-10	2.11e-05	6.37e-05	0.00048826	0.000172511	0.000158786	0.012826	0.000816734	7.4e-05	1.17e-08	0.000836622	0.0115661	0.00165076	Alk	C3	F	Allyl	South	0.0684848	3.52013
CS76488	Fi-0	GER	50.5	8.0167	0.00302355	0.000410919	8.88e-06	-1.51e-05	3.46e-07	-1.23e-05	2.67e-07	-9.99e-07	-2.82e-07	5.38e-08	5.8e-10	1.56e-07	0.00310745	0.000295842	4.31e-05	9.33e-05	0.0039887	0.000337529	8.76e-07	1.17e-08	0.00468294	0.0145369	9.86e-06	MSO	C3	NF	3MSO	North	1.9848	-0.883362
CS76489	Fr-2	GER	50.1102	8.6822	0.000446596	4.78e-07	5.76e-05	-1.51e-05	0.000268666	-1.23e-05	2.67e-07	-9.99e-07	-2.82e-07	5.38e-08	5.8e-10	5.45e-05	3.89e-06	0.000575564	-3.22e-06	0.00547858	0.00456947	0.00103276	0.000134482	1.17e-08	0.00119252	0.00516006	0.00193444	MSO	C4	NF	4MSO	North	-1.7426	0.393857
CS76490	Ga-0	GER	50.3	8	0.000435964	0.000839245	8.88e-06	-1.51e-05	3.46e-07	0.00257537	2.67e-07	-9.99e-07	-2.82e-07	5.38e-08	5.8e-10	1.56e-07	0.00599795	0.000258069	-3.22e-06	7.59e-05	0.00481156	0.000178356	0.000107301	1.17e-08	0.000794633	0.00758947	0.000897186	Alk	C3	NF	Allyl	North	1.87289	-0.502565
CS76491	Gd-1	GER	53.5	10.5	0.000361288	4.78e-07	0.00227377	-1.51e-05	0.000239545	-1.23e-05	3.01e-05	-9.99e-07	-2.82e-07	5.38e-08	5.8e-10	3.7e-05	3.89e-06	0.00032693	-3.22e-06	0.00861858	0.00269813	0.000339988	0.000429582	1.17e-08	0.00401678	0.00818224	9.86e-06	MSO	C4	NF	4MSO	North	-3.9777	-3.85855
CS76492	Gel-1	NED	51.0167	5.86667	0.00163803	4.78e-07	8.88e-06	-1.51e-05	3.46e-07	0.00278519	2.67e-07	-9.99e-07	-2.82e-07	5.38e-08	5.8e-10	1.56e-07	0.000613091	7.38e-05	-3.22e-06	7.07e-06	0.002565	0.000539842	8.76e-07	1.17e-08	0.00458183	0.00960559	9.86e-06	Alk	C3	NF	Allyl	North	1.97309	-0.731348
CS76493	Gie-0	GER	50.584	8.67825	0.00116388	0.00350442	8.88e-06	-1.51e-05	3.46e-07	-1.23e-05	2.67e-07	-9.99e-07	-2.82e-07	5.38e-08	5.8e-10	1.56e-07	0.0104295	0.000314574	-3.22e-06	8.85e-05	0.0041533	8.64e-05	8.76e-07	1.17e-08	0.0010448	0.00623437	0.00103305	MSO	C3	NF	3MSO	North	3.218	-2.63337
CS76496	Gr-1	AUT	47	15.5	0.0023517	4.78e-07	8.88e-06	-1.51e-05	3.46e-07	-1.23e-05	2.67e-07	-9.99e-07	-2.82e-07	5.38e-08	5.8e-10	1.56e-07	5.62e-05	6.28e-05	-3.22e-06	5.04e-05	0.00215384	0.000132778	8.76e-07	1.17e-08	0.00361836	0.00780798	9.86e-06	OH	C3	NF	3OHP	South	1.5859	-1.6335
CS76498	Gu-0	GER	50.3	8	0.000170582	4.78e-07	0.00172363	-1.51e-05	0.000208022	-1.23e-05	2.67e-07	-9.99e-07	-2.82e-07	5.38e-08	5.8e-10	1.56e-07	3.89e-06	0.000234894	-3.22e-06	0.00484751	0.00279923	0.000540253	0.000499764	1.17e-08	0.00291733	0.00638937	9.86e-06	MSO	C4	NF	4MSO	North	-2.34185	-2.70334
CS76500	Ha-0	GER	52.3721	9.73569	0.00239735	0.000188971	8.88e-06	3.25e-05	3.46e-07	0.00140281	2.67e-07	-9.99e-07	-2.82e-07	5.38e-08	5.8e-10	1.56e-07	0.00180926	0.000204857	-3.22e-06	7.07e-06	0.00548646	3.73e-05	8.76e-07	1.17e-08	0.00336805	0.00914733	9.86e-06	Alk	C3	F	Allyl	North	1.80438	-0.890577
CS76512	Hh-0	GER	54.4175	9.88682	0.000745354	4.78e-07	8.88e-06	-1.51e-05	3.46e-07	0.000771058	2.67e-07	-9.99e-07	-2.82e-07	5.38e-08	5.8e-10	1.56e-07	0.000101762	0.000347419	-3.22e-06	7.07e-06	0.00801695	0.000600034	8.76e-07	1.17e-08	0.00165689	0.0156672	0.00141571	Alk	C3	NF	Allyl	North	0.787697	2.4169
CS76513	Hn-0	GER	51.3472	8.28844	0.00185262	3.64e-05	8.88e-06	-1.51e-05	3.46e-07	0.00157794	2.67e-07	-9.99e-07	-2.82e-07	5.38e-08	5.8e-10	1.56e-07	0.00139793	0.000199694	-3.22e-06	0.000421133	0.00448769	0.000316122	8.76e-07	1.17e-08	0.00340999	0.00864386	9.86e-06	Alk	C3	NF	Allyl	North	1.57162	-0.704221
CS76514	HR-5	UK	51.4083	-0.6383	3.96e-05	4.78e-07	0.000861814	0.00334711	3.46e-07	-1.23e-05	2.67e-07	0.000126348	0.000265939	5.38e-08	5.8e-10	4.04e-05	3.89e-06	0.00044191	5.44e-05	0.000730405	0.00420722	0.000279983	0.000208567	1.17e-08	0.000859338	0.00746964	0.000897073	Alk	C4	F	OH-But	North	-2.52352	0.308819
CS76518	Je-0	GER	50.927	11.587	0.00142234	7.33e-05	8.88e-06	4.73e-05	3.46e-07	0.0040728	2.67e-07	-9.99e-07	1.87e-05	5.38e-08	5.8e-10	1.56e-07	0.000511815	0.000384004	-3.22e-06	4.42e-05	0.00605576	0.00024487	8.76e-07	1.17e-08	0.00207915	0.0109158	0.00160549	Alk	C3	F	Allyl	North	1.39187	1.42348
CS76519	Jl-3	CZE	49.2	16.6166	0.00106507	4.78e-07	5.37e-05	-1.51e-05	3.46e-07	0.00100331	2.67e-07	-9.99e-07	-2.82e-07	5.38e-08	5.8e-10	1.56e-07	0.000258519	9.38e-05	-3.22e-06	7.07e-06	0.00205082	0.000176578	8.76e-07	1.17e-08	0.00320144	0.0082311	9.86e-06	Alk	C3	NF	Allyl	North	1.43737	-1.13494
CS76520	Jm-0	CZE	49	15	0.00556126	4.78e-07	8.88e-06	-1.51e-05	3.46e-07	-1.23e-05	2.67e-07	-9.99e-07	-2.82e-07	5.38e-08	5.8e-10	1.56e-07	0.000217104	0.000391567	-3.22e-06	7.05e-05	0.0068918	6.96e-06	8.76e-07	1.17e-08	0.00551109	0.00596836	9.86e-06	OH	C3	NF	3OHP	North	1.65354	-1.83592
CS76524	Kb-0	GER	50.1797	8.50861	0.00164766	4.5e-05	8.14e-05	-1.51e-05	3.46e-07	0.00480972	2.67e-07	-9.99e-07	-2.82e-07	5.38e-08	5.8e-10	1.56e-07	0.00135114	0.000115627	-3.22e-06	7.07e-06	0.00272328	0.00027372	8.76e-07	1.17e-08	0.00472113	0.00980539	9.86e-06	Alk	C3	NF	Allyl	North	2.3119	-0.798484
CS76525	Kelsterbach-4	GER	50.0667	8.5333	0.000138169	4.78e-07	0.00137489	-1.51e-05	0.00018543	-1.23e-05	2.67e-07	-9.99e-07	-2.82e-07	5.38e-08	5.8e-10	1.56e-07	3.25e-05	0.000193157	-3.22e-06	0.00712406	0.00253332	0.000249962	0.000599749	1.17e-08	0.00271434	0.00664183	9.86e-06	MSO	C4	NF	4MSO	North	-2.5798	-3.23066
CS76526	Kil-0	UK	55.6395	-5.66364	0.00218861	5.68e-05	8.88e-06	-1.51e-05	3.46e-07	0.00227262	2.67e-07	-9.99e-07	-2.82e-07	5.38e-08	5.8e-10	1.56e-07	0.000976711	0.000292994	-3.22e-06	7.07e-06	0.00730199	9.6e-05	8.76e-07	1.17e-08	0.00588991	0.011681	9.86e-06	Alk	C3	NF	Allyl	North	1.77202	-0.444967
CS76528	Kl-5	GER	50.95	6.9666	0.00183897	5.56e-05	4.72e-05	8.95e-05	3.46e-07	0.00529495	2.67e-07	-9.99e-07	-2.82e-07	5.38e-08	5.8e-10	1.56e-07	0.00121258	0.000121328	-3.22e-06	7.07e-06	0.00289745	0.000251248	8.76e-07	1.17e-08	0.00494577	0.0114208	9.86e-06	Alk	C3	F	Allyl	North	2.43475	-0.565597
CS76531	Ko-2	DEN	0	0	0.000459333	-8.35e-06	-0.000154943	0.000263744	-6.04e-06	0.000901994	-4.66e-06	1.74e-05	4.93e-06	-9.4e-07	-1.01e-08	-2.72e-06	0.000133988	0.000180103	5.62e-05	-0.000123379	0.00394454	0.000109529	-1.53e-05	-2.04e-07	0.000582096	0.00662635	0.00183734	Alk	C3	NF	Allyl	North	1.17276	0.61835
CS76534	Krot-0	GER	49.631	11.5722	0.00551272	4.78e-07	8.88e-06	-1.51e-05	3.46e-07	-1.23e-05	2.67e-07	-9.99e-07	-2.82e-07	5.38e-08	5.8e-10	1.56e-07	0.000732176	0.000178981	-3.22e-06	9.52e-05	0.00338028	0.000185957	8.76e-07	1.17e-08	0.00608853	0.00997191	9.86e-06	OH	C3	NF	3OHP	North	2.21906	-2.13475
CS76538	La-0	POL	52.7333	15.2333	0.000515449	4.78e-07	0.00143256	-1.51e-05	0.00130531	-1.23e-05	0.000114296	-9.99e-07	-2.82e-07	5.38e-08	5.8e-10	0.000108378	2.6e-05	0.000836563	-3.22e-06	0.0101062	0.00623938	6.76e-05	0.000289074	1.17e-08	0.00308859	0.00747308	9.86e-06	MSO	C4	NF	4MSO	North	-7.01832	-4.53589
CS76539	Lan-0	UK	55.6739	-3.78181	0.000153754	4.78e-07	0.00112353	0.00373654	3.46e-07	-1.23e-05	2.67e-07	0.000725508	0.000248344	5.38e-08	5.8e-10	5.42e-05	3.89e-06	0.000430114	0.000423901	0.00179907	0.003856	0.000106261	0.00051141	1.17e-08	0.00209973	0.00606763	9.86e-06	Alk	C4	F	OH-But	North	-3.78704	-1.06212
CS76540	Le-0	NED	52.1611	4.49015	0.000654324	0.00202678	0.000886714	-1.51e-05	0.000148129	-1.23e-05	2.67e-07	-9.99e-07	-2.82e-07	5.38e-08	5.8e-10	1.56e-07	0.00412212	0.000290992	-3.22e-06	0.00316471	0.00543613	0.000182619	0.000191397	1.17e-08	0.00196919	0.00767837	0.000931645	MSO	C3	NF	3MSO	North	0.323563	-2.14755
CS76541	Li-2:1	GER	50.3833	8.0666	0.0031551	4.78e-07	8.88e-06	-1.51e-05	3.46e-07	-1.23e-05	2.67e-07	-9.99e-07	-2.82e-07	5.38e-08	5.8e-10	1.56e-07	0.00018373	0.000134979	-3.22e-06	9.55e-05	0.00264661	0.000146111	8.76e-07	1.17e-08	0.00308124	0.00767401	9.86e-06	OH	C3	NF	3OHP	North	1.57501	-1.48756
CS76543	Litva	LTU	0	0	0.00385119	4.78e-07	8.88e-06	-1.51e-05	3.46e-07	-1.23e-05	2.67e-07	-9.99e-07	-2.82e-07	5.38e-08	5.8e-10	1.56e-07	0.00103038	0.000213054	2.02e-05	0.00116105	0.00355722	0.000378781	8.76e-07	1.17e-08	0.0012467	0.00624688	0.00129963	OH	C3	NF	3OHP	North	1.33546	-0.617716
CS76545	Lm-2	FRA	48	0.5	0.000405764	4.78e-07	4.71e-05	-1.51e-05	0.000349907	-1.23e-05	2.67e-07	-9.99e-07	-2.82e-07	5.38e-08	5.8e-10	1.56e-07	0.000636782	0.000288762	-3.22e-06	0.00892142	0.004032	4.83e-05	0.000358789	1.17e-08	0.00154389	0.00652852	0.00137394	MSO	C4	NF	4MSO	North	-1.64847	-1.98045
CS76546	Lp2-2	CZE	49.38	16.81	0.00366019	5.09e-05	8.88e-06	-1.51e-05	3.46e-07	-1.23e-05	2.67e-07	-9.99e-07	-2.82e-07	5.38e-08	5.8e-10	1.56e-07	0.000984755	0.000114143	-3.22e-06	0.000395301	0.00246253	0.000196421	8.76e-07	1.17e-08	0.00421717	0.00910322	9.86e-06	OH	C3	NF	3OHP	North	1.87467	-1.81056
CS76549	Me-0	GER	51.9183	10.1138	0.00104529	0.000163091	0.000143354	-1.51e-05	4.92e-05	-1.23e-05	2.67e-07	-9.99e-07	-2.82e-07	5.38e-08	5.8e-10	1.56e-07	0.0019096	0.000122515	-3.22e-06	0.000732163	0.00204231	0.000141568	8.76e-07	1.17e-08	0.00308002	0.00690677	9.86e-06	MSO	C3	NF	3MSO	North	1.28416	-1.85005
CS76550	Mh-0	POL	50.95	20.5	0.000348987	-8.35e-06	0.0019172	0.000263744	0.000263191	0.000215467	-4.66e-06	1.74e-05	4.93e-06	-9.4e-07	-1.01e-08	5.34e-05	-6.79e-05	0.000312647	5.62e-05	0.00929008	0.00320034	0.00047814	0.000683893	-2.04e-07	0.00300889	0.00583977	-0.000172045	MSO	C4	NF	4MSO	North	-4.11948	-3.44358
CS76551	Mir-0	ITA	44	12.37	-5.52e-06	4.78e-07	0.00105033	0.00533965	3.46e-07	-1.23e-05	2.67e-07	3.03e-05	0.000246447	5.38e-08	5.8e-10	5.29e-05	3.89e-06	0.000591431	7.17e-05	0.00235566	0.00437076	0.000533882	0.000378737	1.17e-08	0.00349246	0.00961148	9.86e-06	Alk	C4	F	OH-But	South	-3.80782	-0.406808
CS76552	Mnz-0	GER	50.001	8.26664	0.00134096	5.36e-05	8.88e-06	-1.51e-05	3.46e-07	0.00189296	2.67e-07	-9.99e-07	-2.82e-07	5.38e-08	5.8e-10	1.56e-07	0.0013933	0.000113441	-3.22e-06	0.000390395	0.00295863	0.000175322	8.76e-07	8.55e-06	0.00241586	0.00801372	9.86e-06	Alk	C3	NF	Allyl	North	1.54195	-1.18524
CS76555	Ms-0	RUS	55.7522	37.6322	0.00121306	4.78e-07	8.88e-06	1.24e-05	3.46e-07	0.00174498	2.67e-07	-9.99e-07	-2.82e-07	5.38e-08	5.8e-10	1.56e-07	7.55e-05	0.000206243	-3.22e-06	7.07e-06	0.004928	0.000467984	8.76e-07	1.17e-08	0.0028711	0.00968551	9.86e-06	Alk	C3	F	Allyl	North	1.29358	0.13689
CS76557	Mz-0	GER	50.3	8.3	0.000303904	4.78e-07	0.00172705	-1.51e-05	0.000251107	-1.23e-05	2.67e-07	-9.99e-07	-2.82e-07	5.38e-08	5.8e-10	1.56e-07	3.89e-06	0.000251129	-3.22e-06	0.008197	0.00287537	0.000471369	0.000506185	1.17e-08	0.00310023	0.00623021	9.86e-06	MSO	C4	NF	4MSO	North	-2.88637	-3.28126
CS76558	Na-1	FRA	47.5	1.5	0.00128122	4.78e-07	0.000447697	-1.51e-05	3.46e-07	-1.23e-05	2.67e-07	-9.99e-07	-2.82e-07	5.38e-08	5.8e-10	1.56e-07	0.000101702	0.000217889	-3.22e-06	0.000421656	0.00374005	6.46e-05	8.76e-07	1.17e-08	0.00358467	0.00961714	9.86e-06	OH	C3	NF	3OHP	North	0.806131	-1.12281
CS76559	Nc-1	FRA	48.6167	6.25	0.00626673	0.000136517	8.88e-06	-1.51e-05	3.46e-07	-1.23e-05	2.67e-07	-9.99e-07	-2.82e-07	5.38e-08	5.8e-10	1.56e-07	0.00201937	0.000228172	4.99e-05	8.34e-05	0.00367201	0.000392502	8.76e-07	1.17e-08	0.00486382	0.0110754	9.86e-06	OH	C3	NF	3OHP	North	2.39767	-1.66067
CS76562	Nok-3	NED	52.24	4.45	0.0014625	9.31e-06	0.000172697	-0.000189817	6.73e-06	0.00147537	5.19e-06	-1.94e-05	-5.5e-06	1.05e-06	1.13e-08	3.03e-06	0.000180466	0.000151257	-6.26e-05	0.000137516	0.00344688	0.000598047	1.7e-05	2.28e-07	0.00244106	0.013047	0.000191759	Alk	C3	F	Allyl	North	1.21887	0.258619
CS76563	Np-0	GER	52.6969	10.981	0.00237453	3.91e-05	8.88e-06	-1.51e-05	3.46e-07	-1.23e-05	2.67e-07	-9.99e-07	-2.82e-07	5.38e-08	5.8e-10	1.56e-07	0.000633556	0.000211747	-3.22e-06	0.00051341	0.00516915	2.31e-05	8.76e-07	1.17e-08	0.00437994	0.0127675	9.86e-06	OH	C3	NF	3OHP	North	1.44645	-0.791428
CS76564	Nw-0	GER	50.5	8.5	0.000326738	4.78e-07	0.00260314	-1.51e-05	0.00050927	-1.23e-05	2.67e-07	-9.99e-07	-2.82e-07	5.38e-08	5.8e-10	2.64e-05	3.89e-06	0.000298222	-3.22e-06	0.00871112	0.00343875	0.000839018	0.000226736	1.17e-08	0.00350724	0.00524878	9.86e-06	MSO	C4	NF	4MSO	North	-3.41645	-3.26671
CS76566	Ob-0	GER	50.2	8.5833	0.000282802	4.78e-07	0.00273964	-1.51e-05	0.000349792	-1.23e-05	2.67e-07	-9.99e-07	-2.82e-07	5.38e-08	5.8e-10	2.34e-05	3.89e-06	0.000239564	-3.22e-06	0.00866505	0.00290597	0.000310415	0.000398774	1.17e-08	0.00305247	0.00500771	9.86e-06	MSO	C4	NF	4MSO	North	-3.63956	-3.97632
CS76567	Old-1	GER	53.1667	8.2	0.00118581	4.78e-07	8.88e-06	-1.51e-05	3.46e-07	0.0011733	2.67e-07	-9.99e-07	-2.82e-07	5.38e-08	5.8e-10	1.56e-07	6.89e-05	0.0001801	-3.22e-06	7.07e-06	0.00470366	0.000324622	8.76e-07	1.17e-08	0.00294568	0.0101516	9.86e-06	Alk	C3	NF	Allyl	North	1.28512	-0.102145
CS76568	Or-0	GER	50.3827	8.01161	0.000377383	4.78e-07	0.00213563	-1.51e-05	0.000405613	-1.23e-05	2.67e-07	-9.99e-07	-2.82e-07	5.38e-08	5.8e-10	2.45e-05	4.01e-05	0.000274453	-3.22e-06	0.00946506	0.00356467	0.000682005	0.000485399	1.17e-08	0.00388687	0.00594633	9.86e-06	MSO	C4	NF	4MSO	North	-3.62495	-3.56931
CS76569	Ove-0	GER	53.3422	8.42255	0.00034562	4.78e-07	0.00146334	-1.51e-05	0.000366234	-1.23e-05	2.67e-07	-9.99e-07	-2.82e-07	5.38e-08	5.8e-10	1.56e-07	3.89e-06	0.000208092	-3.22e-06	0.00900623	0.0020279	0.00028305	0.000598251	1.17e-08	0.0028087	0.00539984	9.86e-06	MSO	C4	NF	4MSO	North	-3.03273	-3.89629
CS76573	Pla-0	ESP	41.5	2.25	3.76e-05	4.78e-07	0.000184069	5.64e-05	0.000187255	-1.23e-05	2.67e-07	-9.99e-07	0.000154945	5.38e-08	5.8e-10	1.56e-07	0.000550619	0.000270543	-3.22e-06	0.00472897	0.0042466	0.000154805	8.76e-07	4.29e-06	0.000804565	0.00841148	0.00103119	MSO	C4	F	4MSO	South	-0.686857	-0.405359
CS76579	Pu2-23	CZE	49.42	16.36	0.00142342	4.78e-07	8.88e-06	1.23e-05	3.46e-07	0.00268208	2.67e-07	-9.99e-07	-2.82e-07	5.38e-08	5.8e-10	1.56e-07	0.000308634	0.000143257	-3.22e-06	4.13e-05	0.00458078	0.000199097	8.76e-07	1.17e-08	0.00187383	0.0114428	9.86e-06	Alk	C3	F	Allyl	North	1.59781	0.289255
CS76581	Qar-8a	LBN	34.1	35.84	0.000725743	4.78e-07	0.00015364	0.00057172	3.46e-07	0.00100271	2.67e-07	0.00221025	0.000136163	5.38e-08	5.8e-10	0.000118122	0.000173152	0.00126227	0.000131457	0.000417981	0.0147525	0.000284299	8.76e-07	1.17e-08	0.0015643	0.00889195	0.000984538	Alk	C4	F	OH-But	South	-3.15051	3.57746
CS76582	Ra-0	FRA	46	3.3	0.00353985	3.25e-05	8.88e-06	-1.51e-05	3.46e-07	-1.23e-05	2.67e-07	-9.99e-07	-2.82e-07	5.38e-08	5.8e-10	1.56e-07	0.000554786	9.91e-05	-3.22e-06	0.000453968	0.00269617	0.000257898	8.76e-07	1.17e-08	0.00418973	0.00773524	9.86e-06	OH	C3	NF	3OHP	North	1.76619	-1.82413
CS76583	Ragl-1	UK	54.3512	-3.41697	0.00082916	0.00182106	8.88e-06	-1.51e-05	3.46e-07	-1.23e-05	2.67e-07	-9.99e-07	-2.82e-07	5.38e-08	5.8e-10	1.56e-07	0.0122681	0.000147353	-3.22e-06	0.000462249	0.00267264	0.000538065	8.76e-07	1.17e-08	0.00108832	0.0059632	0.000856946	MSO	C3	NF	3MSO	North	3.07102	-2.35135
CS76584	Rd-0	GER	50.5	8.5	0.000184084	4.78e-07	0.00331405	-1.51e-05	0.000264236	-1.23e-05	3.47e-05	-9.99e-07	-2.82e-07	5.38e-08	5.8e-10	2.45e-05	3.89e-06	0.00025582	-3.22e-06	0.0048341	0.0028207	0.000865389	0.000563429	1.17e-08	0.00379856	0.00535087	9.86e-06	MSO	C4	NF	4MSO	North	-4.41742	-3.89168
CS76588	RLD-1	UNK	0	0	0.00140451	0.00317477	8.88e-06	-1.51e-05	8.02e-05	-1.23e-05	2.67e-07	-9.99e-07	-2.82e-07	5.38e-08	5.8e-10	2.51e-05	0.00524364	0.000243814	-3.22e-06	5.48e-05	0.00428084	0.000153544	8.76e-07	1.17e-08	0.00248134	0.00516752	9.86e-06	MSO	C3	NF	3MSO	North	2.37184	-2.76802
CS76590	Rome-1	ITA	42	12.1	-5.52e-06	4.78e-07	0.000804541	0.00239688	3.46e-07	-1.23e-05	2.67e-07	0.00050476	2.7e-05	5.38e-08	5.8e-10	8.83e-05	3.89e-06	0.000678712	0.000167507	0.000328538	0.00533766	0.00035963	0.00016165	1.17e-08	0.00176134	0.0100065	9.86e-06	Alk	C4	F	OH-But	South	-2.43599	0.592074
CS76591	Rou-0	FRA	49.4424	1.09849	3.48e-05	4.78e-07	0.000834252	0.00307887	3.46e-07	-1.23e-05	2.67e-07	0.000128337	0.000228282	5.38e-08	5.8e-10	7.63e-05	3.89e-06	0.000559614	0.000184797	0.000836481	0.00566943	0.000184806	0.000293663	1.17e-08	0.00335167	0.0133567	9.86e-06	Alk	C4	F	OH-But	North	-2.84556	0.393553
CS76594	Rubezhnoe-1	UKR	49	38.28	0.000829761	9.22e-05	8.88e-06	-1.51e-05	3.46e-07	0.00168578	2.67e-07	-9.99e-07	-2.82e-07	5.38e-08	5.8e-10	1.56e-07	0.0049309	0.000162649	-3.22e-06	7.07e-06	0.00486239	0.000223595	8.76e-07	1.17e-08	0.00220176	0.00943289	9.86e-06	Alk	C3	NF	Allyl	North	1.95305	-0.619385
CS76597	Se-0	ESP	38.3333	-3.53333	0.00027004	4.78e-07	7.14e-05	0.000140856	0.000411377	-1.23e-05	2.67e-07	-9.99e-07	0.00029835	5.38e-08	9.17e-06	1.56e-07	0.00172408	0.000289109	-3.22e-06	0.013101	0.00386399	3.46e-05	0.000223537	1.17e-08	0.00107161	0.00943205	0.00103235	MSO	C4	F	4MSO	South	-2.73595	-1.27533
CS76599	Sei-0	ITA	46.5438	11.5614	0.00287618	4.78e-07	8.88e-06	-1.51e-05	3.46e-07	-1.23e-05	2.67e-07	-9.99e-07	-2.82e-07	5.38e-08	5.8e-10	1.56e-07	0.000308782	0.000105167	-3.22e-06	7.07e-06	0.00317467	0.000102711	8.76e-07	1.17e-08	0.0058205	0.0116868	9.86e-06	OH	C3	NF	3OHP	South	1.84437	-1.59942
CS76600	Sg-1	GER	47.6667	9.5	0.000315319	4.78e-07	0.000743798	-1.51e-05	0.000291005	-1.23e-05	2.67e-07	-9.99e-07	-2.82e-07	5.38e-08	5.8e-10	1.56e-07	3.89e-06	0.000156065	-3.22e-06	0.00720111	0.00155295	0.000171364	0.000402736	1.17e-08	0.00222886	0.00531817	9.86e-06	MSO	C4	NF	4MSO	North	-1.73096	-3.18881
CS76601	Si-0	GER	50.8738	8.02341	0.000439091	4.78e-07	0.00191524	-1.51e-05	0.000403387	-1.23e-05	2.67e-07	-9.99e-07	-2.82e-07	5.38e-08	5.8e-10	3.97e-05	3.89e-06	0.000330107	-3.22e-06	0.00929535	0.00358849	0.000381257	0.00047816	1.17e-08	0.00337457	0.00749448	9.86e-06	MSO	C4	NF	4MSO	North	-3.62439	-3.34611
CS76603	Sp-0	GER	52.5339	13.181	0.00018193	4.78e-07	0.00181825	-1.51e-05	0.000197573	-1.23e-05	2.67e-07	-9.99e-07	-2.82e-07	5.38e-08	5.8e-10	1.56e-07	3.89e-06	0.000276384	-3.22e-06	0.00498521	0.00276081	0.000242314	0.000558713	1.17e-08	0.00287596	0.00692646	9.86e-06	MSO	C4	NF	4MSO	North	-2.57439	-3.00717
CS76604	Sq-8	UK	51.4083	-0.6383	0.00410574	0.000695774	8.88e-06	-1.51e-05	3.46e-07	-1.23e-05	2.67e-07	-9.99e-07	-2.82e-07	5.38e-08	5.8e-10	1.56e-07	0.00393922	0.000166442	-3.22e-06	8.2e-05	0.0030215	0.000255837	8.76e-07	1.17e-08	0.00367264	0.00886347	9.86e-06	MSO	C3	NF	3MSO	North	2.45782	-2.11722
CS76605	Stw-0	RUS	52	36	0.00332195	4.78e-07	8.88e-06	-1.51e-05	3.46e-07	-1.23e-05	2.67e-07	-9.99e-07	-2.82e-07	5.38e-08	5.8e-10	1.56e-07	0.000187996	0.000107978	-3.22e-06	9.37e-05	0.00312196	0.000214104	8.76e-07	1.17e-08	0.00625041	0.0103236	9.86e-06	OH	C3	NF	3OHP	North	1.88442	-1.83476
CS76606	Su-0	UK	53.6473	-3.00733	0.000828296	4.78e-07	8.88e-06	2.68e-05	3.46e-07	0.00097439	2.67e-07	-9.99e-07	2.71e-05	5.38e-08	5.8e-10	1.56e-07	0.000553918	0.000151343	0.000338005	0.000106129	0.00401337	0.000325499	8.76e-07	1.17e-08	0.00175745	0.00660516	9.86e-06	Alk	C3	F	Allyl	North	1.07117	-0.178757
CS76608	Ta-0	CZE	49.5	14.5	0.00435217	4.78e-07	8.88e-06	-1.51e-05	3.46e-07	-1.23e-05	2.67e-07	-9.99e-07	-2.82e-07	5.38e-08	5.8e-10	1.56e-07	0.000259551	0.000103628	-3.22e-06	6.06e-05	0.00236538	0.000312337	8.76e-07	1.17e-08	0.00536987	0.00971464	9.86e-06	OH	C3	NF	3OHP	North	2.02989	-1.87751
CS76610	Tamm-2	FIN	60	23.5	0.00128832	-8.35e-06	-0.000154943	0.000263744	-6.04e-06	0.0035444	-4.66e-06	1.74e-05	4.93e-06	-9.4e-07	-1.01e-08	-2.72e-06	0.00059457	0.000175776	5.62e-05	-3.02e-05	0.00394699	0.000522913	-1.53e-05	-2.04e-07	0.00492912	0.00841171	-0.000172045	Alk	C3	NF	Allyl	North	2.03057	-0.350696
CS76611	Tha-1	NED	52.08	4.3	0.00181673	4.78e-07	6.67e-05	0.000187819	3.46e-07	0.00339167	2.67e-07	2.85e-05	-2.82e-07	5.38e-08	5.8e-10	1.56e-07	0.000293455	0.000205666	-3.22e-06	4.64e-05	0.00549231	0.000583436	0.000135047	1.17e-08	0.00112568	0.0136409	0.00090575	Alk	C3	F	Allyl	North	1.20983	1.53249
CS76612	Ting-1	SWE	56.5	14.9	0.000874832	-8.35e-06	-0.000154943	0.000263744	0.00123182	0.000215467	-4.66e-06	1.74e-05	4.93e-06	-9.4e-07	-1.01e-08	-2.72e-06	3.9e-05	0.000269072	5.62e-05	-0.000123379	0.00451761	0.000340117	-1.53e-05	-2.04e-07	0.00308552	0.00968062	-0.000172045	Alk	C4	NF	Butenyl	North	0.391992	-1.12758
CS76615	Ts-1	ESP	41.7194	2.93056	-5.52e-06	4.78e-07	7.18e-05	-1.51e-05	0.000126742	-1.23e-05	2.67e-07	-9.99e-07	0.000244214	5.38e-08	5.8e-10	1.56e-07	0.000218961	0.000183497	-3.22e-06	0.00493027	0.00385163	0.000298968	0.000195147	4.09e-06	0.00118701	0.0126851	9.86e-06	MSO	C4	NF	4MSO	South	-1.05665	-0.310149
CS76616	Tscha-1	AUT	47.0748	9.9042	0.00123326	4.78e-07	8.88e-06	-1.51e-05	0.000857575	0.000798768	2.67e-07	-9.99e-07	-2.82e-07	5.38e-08	5.8e-10	1.56e-07	0.000115389	0.000244217	-3.22e-06	7.07e-06	0.00487808	4.99e-05	4.97e-05	1.17e-08	0.00208564	0.0103179	9.86e-06	Alk	C3	NF	Allyl	North	0.47146	-0.922279
CS76620	Uk-1	GER	48.0333	7.7667	0.000267076	4.78e-07	0.0011867	-1.51e-05	0.000291016	-1.23e-05	2.67e-07	-9.99e-07	3.42e-05	2.42e-05	5.8e-10	2.98e-05	3.89e-06	0.000726904	-3.22e-06	0.00652031	0.00509467	0.000230872	0.00072634	1.17e-08	0.00197278	0.00714077	9.86e-06	MSO	C4	NF	4MSO	North	-4.33529	-2.04626
CS76621	Uod-1	AUT	48.3	14.45	0.00572735	4.78e-07	8.88e-06	-1.51e-05	3.46e-07	-1.23e-05	2.67e-07	-9.99e-07	-2.82e-07	5.38e-08	5.8e-10	1.56e-07	0.000427901	0.000158099	-3.22e-06	0.000108017	0.00394216	0.000328755	8.76e-07	1.17e-08	0.00594003	0.0108368	9.86e-06	OH	C3	NF	3OHP	North	2.22228	-1.76383
CS76622	Utrecht	NED	52.0918	5.1145	0.00241474	4.78e-07	8.88e-06	-1.51e-05	3.46e-07	-1.23e-05	2.67e-07	-9.99e-07	-2.82e-07	5.38e-08	5.8e-10	1.56e-07	0.000459959	8.54e-05	-3.22e-06	7.07e-06	0.00210379	0.000175134	8.76e-07	1.17e-08	0.00573219	0.0103433	9.86e-06	OH	C3	NF	3OHP	North	1.8027	-1.82935
CS76624	Ven-1	NED	52.0333	5.55	0.000220069	4.78e-07	0.000196637	-1.51e-05	0.000533572	-1.23e-05	2.67e-07	-9.99e-07	7.13e-05	5.38e-08	5.8e-10	4.19e-05	3.89e-06	0.000563535	-3.22e-06	0.00922473	0.00430902	0.000273224	0.0003685	1.17e-08	0.000859335	0.00436976	9.86e-06	MSO	C4	NF	4MSO	North	-3.12762	-2.04162
CS76625	Vind-1	UK	54.9902	-2.3671	6.07e-05	4.78e-07	0.00153148	0.00609859	3.46e-07	-1.23e-05	0.000111611	0.000148399	0.00033494	5.38e-08	5.8e-10	0.000198686	3.89e-06	0.000704492	0.000292717	0.00175535	0.0049284	0.000434279	0.000307587	1.17e-08	0.00333549	0.0106426	9.86e-06	Alk	C4	F	OH-But	North	-7.69113	-1.13827
CS76626	Wa-1	POL	52.3	21	0.00100626	0.00085958	8.88e-06	-1.51e-05	3.46e-07	-1.23e-05	2.67e-07	-9.99e-07	-2.82e-07	5.38e-08	5.8e-10	1.56e-07	0.00706806	0.000194231	-3.22e-06	0.000116555	0.00321312	0.000375428	8.76e-07	1.17e-08	0.00174124	0.00848436	0.00097757	MSO	C3	NF	3MSO	North	2.17487	-1.17925
CS76627	Wc-1	GER	52.6	10.0667	0.00375076	4.78e-07	8.88e-06	-1.51e-05	3.46e-07	-1.23e-05	2.67e-07	-9.99e-07	-2.82e-07	5.38e-08	5.8e-10	1.56e-07	0.000249085	0.00013804	-3.22e-06	8.35e-05	0.00220955	0.000250947	8.76e-07	1.17e-08	0.00541161	0.00997097	9.86e-06	OH	C3	NF	3OHP	North	1.88075	-1.8255
CS76628	Wei-0	SUI	47.25	8.26	0.00445444	4.78e-07	8.88e-06	-1.51e-05	3.46e-07	-1.23e-05	2.67e-07	-9.99e-07	-2.82e-07	5.38e-08	5.8e-10	1.56e-07	0.000538175	0.000127574	-3.22e-06	0.000117818	0.00422074	7.22e-06	8.76e-07	5.85e-06	0.00644602	0.0130398	9.86e-06	OH	C3	NF	3OHP	North	2.08266	-1.93778
CS76630	Wl-0	GER	47.9299	10.8134	0.00186272	0.000158751	8.88e-06	-1.51e-05	3.46e-07	0.00166037	2.67e-07	-9.99e-07	-2.82e-07	5.38e-08	5.8e-10	1.56e-07	0.00121122	0.000155298	-3.22e-06	7.07e-06	0.00349505	5.82e-05	8.76e-07	1.17e-08	0.00267404	0.00787539	9.86e-06	Alk	C3	NF	Allyl	North	1.72403	-1.04544
CS76632	Wt-5	GER	52.3	9.3	0.000192648	4.78e-07	6.84e-05	-1.51e-05	0.000338337	-1.23e-05	2.67e-07	-9.99e-07	-2.82e-07	5.38e-08	5.8e-10	1.56e-07	3.89e-06	0.000195242	-3.22e-06	0.00713463	0.00241565	0.000170979	0.000331263	1.17e-08	0.000600329	0.00494005	0.000799631	MSO	C4	NF	4MSO	North	-1.36023	-2.03027
CS76635	Zdr-1	CZE	49.3853	16.2544	0.00746755	4.78e-07	8.88e-06	-1.51e-05	3.46e-07	-1.23e-05	2.67e-07	-9.99e-07	-2.82e-07	5.38e-08	5.8e-10	1.56e-07	0.00043723	0.000119982	-3.22e-06	0.000788666	0.00332428	0.000502461	8.76e-07	1.17e-08	0.00618588	0.0108188	9.86e-06	OH	C3	NF	3OHP	North	2.50326	-2.12279
CS76640	11C1	UK	55.8877	-3.21072	-5.52e-06	4.78e-07	0.000794817	0.00297673	3.46e-07	-1.23e-05	2.67e-07	-9.99e-07	0.000476635	5.38e-08	5.8e-10	1.85e-05	3.89e-06	0.000461218	0.000137291	0.000641689	0.00334351	0.0003202	0.000284868	1.17e-08	0.00334129	0.00990077	9.86e-06	Alk	C4	F	OH-But	North	-2.63063	-0.15854
CS76642	IP-Ace-0	ESP	39.84	-6.6	0.000422598	4.78e-07	0.000512353	0.00203345	0.000457912	0.000725502	2.67e-07	0.000184573	-2.82e-07	5.38e-08	5.8e-10	1.56e-07	3.89e-06	0.00014329	-3.22e-06	0.00296876	0.00371452	0.000309739	8.76e-07	1.17e-08	0.00212853	0.0116195	9.86e-06	Alk	C4	F	OH-But	South	-0.428947	-0.805606
CS76644	??dal 3	SWE	62.8622	18.336	0.000909562	-8.35e-06	-0.000154943	0.000263744	-6.04e-06	0.00133205	-4.66e-06	1.74e-05	0.000105286	-9.4e-07	-1.01e-08	-2.72e-06	-2.26e-05	0.000203495	5.62e-05	-9.64e-05	0.011063	1.06e-05	-1.53e-05	-2.04e-07	0.00269226	0.0159937	0.00366754	Alk	C3	NF	Allyl	North	1.16934	3.19767
CS76646	IP-Adc-5	ESP	38.77	-4.07	0.000704908	4.78e-07	8.88e-06	2.14e-05	3.46e-07	0.000774012	2.67e-07	-9.99e-07	4.75e-05	5.38e-08	5.8e-10	1.56e-07	0.000154157	0.000376198	-3.22e-06	7.07e-06	0.0115072	0.000198484	8.76e-07	1.17e-08	0.00198121	0.0151426	0.00119418	Alk	C3	F	Allyl	South	0.597369	2.45855
CS76647	IP-Adm-0	ESP	39.15	-4.54	-5.52e-06	4.78e-07	0.00126709	0.00461791	3.46e-07	-1.23e-05	2.67e-07	0.000419433	0.000163397	5.38e-08	5.8e-10	7.86e-05	3.89e-06	0.000736662	0.000120411	0.00136559	0.00700676	0.000413566	0.000321786	1.17e-08	0.00430505	0.00930682	9.86e-06	Alk	C4	F	OH-But	South	-3.90562	-0.106651
CS76648	Aiell-1	ITA	39.1269	16.1702	-5.52e-06	4.78e-07	0.000732034	0.00300346	3.46e-07	-1.23e-05	7.38e-05	9.96e-05	-2.82e-07	5.38e-08	5.8e-10	1.96e-05	3.89e-06	0.000290045	-3.22e-06	0.00509116	0.00404846	0.00021028	0.000405378	1.17e-08	0.00244266	0.0103662	9.86e-06	Alk	C4	F	OH-But	South	-3.59665	-2.36049
CS76650	IP-Ala-0	ESP	39.72	-6.89	-5.52e-06	4.78e-07	0.00110333	0.00276173	3.46e-07	-1.23e-05	2.67e-07	0.00195473	-2.82e-07	5.38e-08	5.8e-10	6.87e-05	3.89e-06	0.000420179	0.000293376	0.00298442	0.00320983	0.000288895	0.000496473	1.17e-08	0.00332827	0.0105941	9.86e-06	Alk	C4	F	OH-But	South	-3.4958	-1.15164
CS76651	Ale-Stenar-41-1	SWE	55.3833	14.05	0.000413609	-8.35e-06	-0.000154943	0.000263744	-6.04e-06	0.000385425	-4.66e-06	1.74e-05	0.000130586	-9.4e-07	-1.01e-08	-2.72e-06	-2.47e-05	0.000121811	5.62e-05	-0.000123379	0.00505326	0.000117318	-1.53e-05	-2.04e-07	0.00133827	0.0117261	-0.000172045	Alk	C3	NF	Allyl	North	0.976491	0.628652
CS76652	Ale-Stenar-44-4	SWE	55.3833	14.05	0.000445389	-8.35e-06	-0.000154943	0.000263744	-6.04e-06	0.000505796	-4.66e-06	1.74e-05	0.000116968	-9.4e-07	-1.01e-08	-2.72e-06	-2.95e-05	0.000210688	5.62e-05	-0.000123379	0.00623832	0.000205403	-1.53e-05	-2.04e-07	0.00108824	0.0110634	0.00248468	Alk	C3	NF	Allyl	North	0.832749	1.91043
CS76654	Ale-Stenar-64-24	SWE	55.3833	14.05	0.000622677	-8.35e-06	-0.000154943	0.000263744	-6.04e-06	0.000405507	-4.66e-06	1.74e-05	4.93e-06	-9.4e-07	-1.01e-08	6.03e-05	-6.79e-05	0.000639183	5.62e-05	-0.000123379	0.0130541	1.06e-05	-1.53e-05	-2.04e-07	0.00126583	0.0130894	0.00357944	Alk	C3	NF	Allyl	North	-0.226107	3.79245
CS76656	Aledal-6-49	SWE	56.7	16.5167	0.000468395	-8.35e-06	-0.000154943	0.000263744	-6.04e-06	0.000435756	-4.66e-06	1.74e-05	4.93e-06	-9.4e-07	-1.01e-08	-2.72e-06	0.000125348	0.000192109	5.62e-05	-0.000123379	0.00539743	0.000376815	-1.53e-05	-2.04e-07	0.000893278	0.0120389	-0.000172045	Alk	C3	NF	Allyl	North	1.12438	0.985939
CS76659	IP-All-0	ESP	42.19	-7.8	0.000153376	4.78e-07	0.00071446	0.00280729	3.46e-07	-1.23e-05	2.67e-07	0.000165734	0.00029242	3.08e-05	5.8e-10	1.56e-07	3.89e-06	0.000380671	5.1e-05	0.00534229	0.00366641	0.000162366	0.000195453	6.94e-06	0.00179601	0.00804711	9.86e-06	Alk	C4	F	OH-But	South	-3.04299	-1.15016
CS76660	IP-Alm-0	ESP	39.88	-0.36	0.000451244	4.78e-07	8.88e-06	0.000591667	3.46e-07	0.00102754	2.67e-07	0.000141072	9.53e-05	5.38e-08	5.8e-10	1.56e-07	3.48e-05	0.000560714	0.000369569	0.000344219	0.0107857	5.01e-05	8.76e-07	1.17e-08	0.000833798	0.0136948	0.00116299	Alk	C3	F	Allyl	South	-0.12997	2.83577
CS76662	IP-Alo-0	POR	40.11	-7.47	0.000263454	4.78e-07	0.00043343	0.00152436	3.46e-07	0.000499751	2.67e-07	0.000167995	3.58e-05	5.38e-08	5.8e-10	5.59e-05	3.89e-06	0.000644451	5.02e-05	0.00141533	0.00782596	0.000376865	0.000205755	1.17e-08	0.00173621	0.00938517	0.00187898	Alk	C4	F	OH-But	South	-1.79541	1.42883
CS76663	Alt-1	GER	48.59	9.22	0.00197612	5.42e-05	6.76e-05	-1.51e-05	3.46e-07	0.00235245	2.67e-07	-9.99e-07	-2.82e-07	5.38e-08	5.8e-10	1.56e-07	0.000483604	0.000160833	-3.22e-06	0.000450652	0.00372498	0.000362304	8.76e-07	1.17e-08	0.0028887	0.00863381	9.86e-06	Alk	C3	NF	Allyl	North	1.58751	-0.524261
CS76665	??ngs??-74-430	SWE	59.5667	16.8667	0.000417659	-8.35e-06	-0.000154943	0.000263744	-6.04e-06	0.000913364	-4.66e-06	1.74e-05	4.69e-05	-9.4e-07	-1.01e-08	-2.72e-06	0.000136217	0.000230276	5.62e-05	-0.000123379	0.00495829	0.000458768	-1.53e-05	-2.04e-07	0.000691754	0.00559805	-0.000172045	Alk	C3	NF	Allyl	North	0.910879	0.376221
CS76667	App1-12	SWE	56.3333	15.9667	0.00237462	4.78e-07	8.88e-06	-1.51e-05	3.46e-07	-1.23e-05	2.67e-07	-9.99e-07	-2.82e-07	5.38e-08	5.8e-10	1.56e-07	0.00012338	0.000126299	-3.22e-06	0.000120355	0.00313702	0.000472002	8.76e-07	1.17e-08	0.00410336	0.0131685	9.86e-06	OH	C3	NF	3OHP	North	1.54905	-0.51834
CS76668	App1-14	SWE	56.3333	15.9667	0.001609	5.95e-05	5.1e-05	-1.51e-05	3.46e-07	0.00271962	2.67e-07	-9.99e-07	3.03e-05	5.38e-08	5.8e-10	1.56e-07	0.000475722	0.000215446	-3.22e-06	3.28e-05	0.00462078	0.000424627	8.76e-07	1.17e-08	0.0028085	0.0112555	9.86e-06	Alk	C3	NF	Allyl	North	1.50654	0.295647
CS76669	App1-16	SWE	56.3333	15.9667	0.000781402	4.78e-07	8.88e-06	-1.51e-05	3.46e-07	0.000919252	2.67e-07	-9.99e-07	2.74e-05	5.38e-08	5.8e-10	1.56e-07	0.000434215	0.000119261	-3.22e-06	7.07e-06	0.0038121	0.000425081	8.76e-07	1.17e-08	0.00185764	0.0105504	0.00108258	Alk	C3	NF	Allyl	North	1.20708	0.50275
CS76671	IP-Are-0	ESP	41	-4.71	0.00114366	4.78e-07	8.88e-06	2.4e-05	3.46e-07	0.00159095	2.67e-07	-9.99e-07	5.64e-05	5.38e-08	5.8e-10	1.56e-07	0.000347423	0.000268321	2.5e-05	4.4e-05	0.00710583	0.000314644	8.76e-07	1.17e-08	0.00183336	0.0116833	9.86e-06	Alk	C3	F	Allyl	South	0.987665	0.96301
CS76672	ARGE-1-15	FRA	47.16	4.28	0.000516605	4.78e-07	0.00135571	0.00444602	3.46e-07	-1.23e-05	2.67e-07	3.6e-05	0.000150634	5.38e-08	5.8e-10	6.38e-05	2.65e-05	0.000715526	0.000131015	0.00241097	0.00547155	0.000410241	0.000392964	1.17e-08	0.00437626	0.00958538	9.86e-06	Alk	C4	F	OH-But	North	-3.80072	-0.743606
CS76673	ARR-17	FRA	44.05	3.69	-5.52e-06	4.78e-07	0.000551871	0.00515103	3.46e-07	-1.23e-05	2.67e-07	0.000155434	0.000593457	5.38e-08	5.8e-10	1.56e-07	3.89e-06	0.000391287	4.3e-05	0.00240188	0.00421017	0.000412062	1.82e-05	1.17e-08	0.0021325	0.00843577	9.86e-06	Alk	C4	F	OH-But	North	-2.76461	0.406842
CS76674	IP-Aru-0	ESP	41.81	2.49	0.00104982	4.78e-07	8.88e-06	6.43e-05	0.000496197	0.0012335	2.67e-07	4.47e-05	-2.82e-07	5.38e-08	5.8e-10	1.56e-07	3.45e-05	0.000112816	-3.22e-06	3.59e-05	0.00281765	0.000249144	8.76e-07	1.17e-08	0.00150985	0.00652411	0.000658917	Alk	C3	F	Allyl	South	0.928108	-0.840435
CS76675	IP-Aul-0	ESP	40.52	-4.02	0.000750519	9.31e-06	0.000172697	-0.000293964	6.73e-06	0.000811952	5.19e-06	-1.94e-05	3.17e-05	1.05e-06	1.13e-08	3.03e-06	0.00023404	0.000206538	-6.26e-05	0.000137516	0.00575434	0.000347354	1.7e-05	2.28e-07	0.00210297	0.0125509	0.000191759	Alk	C3	NF	Allyl	South	0.791237	0.514062
CS76676	B?1-2	SWE	56.4	12.9	0.00217839	4.78e-07	8.88e-06	-1.51e-05	3.46e-07	0.00284063	2.67e-07	-9.99e-07	-2.82e-07	5.38e-08	5.8e-10	1.56e-07	0.000240815	0.000144681	-3.22e-06	0.000360897	0.0042165	0.00022167	8.76e-07	1.17e-08	0.00334178	0.00981443	9.86e-06	Alk	C3	NF	Allyl	North	1.77829	-0.436903
CS76677	B?4-1	SWE	56.4	12.9	0.00162737	4.78e-07	0.00016751	-1.51e-05	0.00111499	0.00145566	2.67e-07	-9.99e-07	-2.82e-07	5.38e-08	5.8e-10	1.21e-05	0.000139951	0.000463071	-3.22e-06	7.07e-06	0.00760888	0.000168749	8.76e-07	1.17e-08	0.00142139	0.0112593	0.0014232	Alk	C3	NF	Allyl	North	-0.0653684	0.469292
CS76678	B?5-1	SWE	56.4	12.9	0.00152601	4.78e-07	7.09e-05	3.63e-05	3.46e-07	0.00232687	2.67e-07	-9.99e-07	-2.82e-07	5.38e-08	5.8e-10	1.56e-07	0.000283709	0.00031794	-3.22e-06	7.07e-06	0.00637532	0.000125973	2.81e-05	1.17e-08	0.00352144	0.0109628	9.86e-06	Alk	C3	F	Allyl	North	1.24789	0.0990277
CS76679	Bach-7	GER	48.41	8.84	0.00153299	4.78e-07	8.88e-06	-1.51e-05	3.46e-07	0.00195063	2.67e-07	-9.99e-07	4.92e-05	5.38e-08	5.8e-10	1.56e-07	0.000445248	0.00015874	-3.22e-06	7.07e-06	0.00296148	0.00025442	8.76e-07	1.17e-08	0.00317859	0.0109004	9.86e-06	Alk	C3	NF	Allyl	North	1.51453	-0.371073
CS76681	IP-Bae-0	ESP	43.34	-5.84	-5.52e-06	4.78e-07	0.000649712	0.00171506	3.46e-07	-1.23e-05	2.67e-07	0.00156098	-2.82e-07	5.38e-08	5.8e-10	6.03e-05	3.89e-06	0.00034409	0.000319958	0.00326786	0.00235661	0.000165864	0.000356386	1.17e-08	0.000880276	0.0031529	9.86e-06	Alk	C4	F	OH-But	South	-2.65021	-1.54542
CS76682	Bai-10	GER	48.5	8.78	0.00254888	0.000188466	8.88e-06	-1.51e-05	3.46e-07	0.00322454	2.67e-07	-9.99e-07	-2.82e-07	5.38e-08	5.8e-10	1.56e-07	0.00162156	0.000184094	-3.22e-06	0.000549939	0.00370809	0.000217793	8.76e-07	1.17e-08	0.00302709	0.00733136	9.86e-06	Alk	C3	NF	Allyl	North	2.00455	-0.988423
CS76688	Bar 1	SWE	62.8698	18.381	0.00085622	-8.35e-06	-0.000154943	0.000263744	-6.04e-06	0.00116127	-4.66e-06	1.74e-05	0.000111279	-9.4e-07	-1.01e-08	-2.72e-06	-6.79e-05	0.00027236	5.62e-05	-0.000123379	0.00798846	1.06e-05	-1.53e-05	-2.04e-07	0.00129479	0.00930257	-0.000172045	Alk	C3	NF	Allyl	North	0.865747	0.880173
CS76689	IP-Bar-1	ESP	41.43	2.13	0.000194244	4.78e-07	0.00023013	0.0017804	3.46e-07	0.000289707	2.67e-07	0.000548101	0.000476358	5.38e-08	5.8e-10	7.97e-05	3.89e-06	0.00079173	-3.22e-06	0.000837187	0.00897216	7.16e-05	3.09e-05	1.17e-08	0.00141095	0.0134849	9.86e-06	Alk	C4	F	OH-But	South	-2.76892	2.32471
CS76690	Basen-1	ITA	40.37	16.77	0.00126888	0.00013211	8.36e-05	0.000154745	3.46e-07	0.00446074	2.67e-07	3.23e-05	-2.82e-07	5.38e-08	5.8e-10	1.56e-07	0.00188985	0.000123691	2.5e-05	7.31e-05	0.00309439	0.000240169	0.000127407	1.17e-08	0.00321598	0.0106457	9.86e-06	Alk	C3	F	Allyl	South	1.843	-0.511035
CS76694	BAU-15	FRA	50.6	2.93	-5.52e-06	4.78e-07	0.000617441	0.00248323	3.46e-07	-1.23e-05	2.67e-07	8.15e-05	0.00014247	5.38e-08	5.8e-10	9.06e-05	3.89e-06	0.000600406	0.000155521	0.00122538	0.00503766	0.000266075	4.69e-05	1.17e-08	0.00239512	0.00987108	9.86e-06	Alk	C4	F	OH-But	North	-2.18275	0.427042
CS76695	IP-Bea-0	ESP	36.52	-5.27	0.000531503	3.42e-06	0.000670344	0.0017089	2.47e-06	0.000339144	1.91e-06	0.000816777	2.06e-05	3.85e-07	4.54e-06	4.59e-05	8.71e-05	0.000383157	0.000661684	0.000955063	0.00436523	0.000261873	0.000156766	8.37e-08	0.00204301	0.00925898	7.05e-05	Alk	C4	F	OH-But	South	-1.46385	0.362734
CS76697	Bela-2	SVK	48.47	18.94	0.00107804	4.78e-07	8.88e-06	0.000249705	3.46e-07	0.00159054	2.67e-07	-9.99e-07	-2.82e-07	5.38e-08	5.8e-10	1.56e-07	0.000110689	0.000287526	0.000439777	0.000103172	0.00637223	0.000525073	8.76e-07	1.17e-08	0.000858607	0.0115076	0.00156537	Alk	C3	F	Allyl	South	0.889793	2.09476
CS76699	Bela-4	SVK	48.47	18.94	0.00112637	4.78e-07	8.88e-06	-1.51e-05	3.46e-07	0.00414858	2.67e-07	0.000101239	-2.82e-07	5.38e-08	5.8e-10	1.56e-07	0.00032606	0.000134453	0.000424146	7.07e-06	0.00258496	0.000305668	8.76e-07	1.17e-08	0.00249878	0.00536958	9.86e-06	Alk	C3	NF	Allyl	South	1.70481	-0.329095
CS76700	IP-Ben-0	ESP	38.37	-2.66	0.000291645	4.78e-07	0.000727701	0.00350487	3.46e-07	0.000142252	2.67e-07	0.000302453	0.000109672	5.38e-08	5.8e-10	7.56e-05	3.89e-06	0.000751613	0.000247983	0.000470125	0.00528316	0.000451029	0.00013897	1.17e-08	0.00415508	0.00852338	9.86e-06	Alk	C4	F	OH-But	South	-2.52375	0.123113
CS76701	Berg-1	GER	48.41	8.79	0.00163226	0.000281991	8.88e-06	-1.51e-05	3.46e-07	0.00175439	2.67e-07	-9.99e-07	-2.82e-07	5.38e-08	5.8e-10	1.56e-07	0.00239857	0.000205325	-3.22e-06	0.000387216	0.00330759	6.87e-05	8.76e-07	1.17e-08	0.00364936	0.00910019	9.86e-06	Alk	C3	NF	Allyl	North	1.84662	-1.29288
CS76703	BEZ-9	FRA	44.12	3.77	-5.52e-06	4.78e-07	0.000994034	0.00685468	3.46e-07	-1.23e-05	2.67e-07	0.000509695	0.000173222	5.38e-08	5.8e-10	5.82e-05	3.89e-06	0.00038407	0.000131443	0.00130919	0.00321849	0.000555553	5.83e-05	1.17e-08	0.00318073	0.0105518	9.86e-06	Alk	C4	F	OH-But	North	-2.88199	-0.0488473
CS76706	BI-4	GER	48.4	8.77	0.00178482	6.95e-05	8.88e-06	-1.51e-05	3.46e-07	0.00219571	2.67e-07	-9.99e-07	-2.82e-07	5.38e-08	5.8e-10	1.56e-07	0.000966034	0.000195078	-3.22e-06	7.07e-06	0.00379265	0.000114594	8.76e-07	1.17e-08	0.00402026	0.00855351	9.86e-06	Alk	C3	NF	Allyl	North	1.75277	-1.00161
CS76711	IP-Bis-0	ESP	42.49	0.54	0.00145755	4.78e-07	8.88e-06	2.03e-05	3.46e-07	0.0033176	2.67e-07	0.00010627	7.2e-05	5.38e-08	5.8e-10	1.56e-07	0.000252163	0.000301374	-3.22e-06	4.68e-05	0.008326	0.000446133	8.76e-07	1.17e-08	0.0018095	0.0146607	9.86e-06	Alk	C3	F	Allyl	South	1.17327	1.92942
CS76712	Bisig-1	ITA	39.48	16.28	0.000171047	4.78e-07	0.000303229	0.00226474	3.46e-07	-1.23e-05	2.67e-07	0.000811815	-2.82e-07	5.38e-08	5.8e-10	1.29e-05	0.00093507	0.000275461	3.57e-05	0.000547896	0.0041643	8.48e-05	0.000131728	1.17e-08	0.000993382	0.008498	9.86e-06	Alk	C4	F	OH-But	South	-0.628861	-0.435636
CS76713	Bivio-1	ITA	39.13	16.17	-0.000107343	9.31e-06	0.000172697	0.00486588	6.73e-06	-0.000240156	5.19e-06	0.0003137	-5.5e-06	1.05e-06	1.13e-08	3.43e-05	7.57e-05	0.000437309	-6.26e-05	0.00430878	0.00433988	5.48e-05	0.000389963	2.28e-07	0.0034112	0.0122922	0.000191759	Alk	C4	F	OH-But	South	-2.60885	-1.04579
CS76714	IP-Boa-0	ESP	40.4	-3.88	0.00122153	4.78e-07	8.88e-06	4.36e-05	3.46e-07	0.00200486	2.67e-07	-9.99e-07	5.63e-05	5.38e-08	5.8e-10	1.56e-07	0.000153049	0.00020592	-3.22e-06	7.07e-06	0.00729332	0.000190661	7.8e-05	1.17e-08	0.00221084	0.0168509	9.86e-06	Alk	C3	F	Allyl	South	1.08662	1.34415
CS76715	B??n 1	SWE	62.8794	18.4473	0.00157578	4.78e-07	8.88e-06	2.02e-05	3.46e-07	0.00346578	2.67e-07	-9.99e-07	2.06e-05	5.38e-08	5.8e-10	1.56e-07	0.000329322	0.000269865	-3.22e-06	2.62e-05	0.00466412	0.000584015	8.76e-07	1.17e-08	0.00258294	0.0128657	0.00169727	Alk	C3	F	Allyl	North	1.52993	1.52624
CS76717	IP-Bor-0	ESP	42.49	-6.71	-5.52e-06	4.78e-07	8.88e-06	0.000451776	0.000792498	0.00031563	2.67e-07	0.000165824	3.09e-05	5.38e-08	5.8e-10	1.56e-07	3.89e-06	0.000284227	9.33e-05	0.000502749	0.00281905	0.000137753	8.32e-05	1.17e-08	0.00134738	0.00486443	9.86e-06	Alk	C4	F	OH-But	South	-0.336446	-1.46059
CS76718	Borky1	CZE	49.403	16.232	0.00332484	4.78e-07	8.88e-06	-1.51e-05	3.46e-07	-1.23e-05	2.67e-07	-9.99e-07	-2.82e-07	5.38e-08	5.8e-10	1.56e-07	0.000192465	0.000157918	-3.22e-06	0.000599325	0.00358422	0.000288771	8.76e-07	1.17e-08	0.00443865	0.0129213	9.86e-06	OH	C3	NF	3OHP	North	1.63326	-0.912879
CS76719	IP-Bos-0	ESP	42.78	0.69	0.000118029	4.78e-07	0.000517657	0.00223857	3.46e-07	-1.23e-05	2.67e-07	6.07e-05	-2.82e-07	5.38e-08	5.8e-10	1.14e-05	3.89e-06	0.000224548	2.66e-05	0.000798952	0.00228584	0.000207364	0.000101204	1.17e-08	0.00267913	0.00699686	9.86e-06	Alk	C4	F	OH-But	South	-0.43441	-1.28508
CS76720	B??t 1	SWE	57.7133	15.0689	0.000622638	-8.35e-06	-0.000154943	0.000263744	-6.04e-06	0.000861565	-4.66e-06	1.74e-05	4.93e-06	-9.4e-07	-1.01e-08	-2.72e-06	-6.79e-05	0.000203302	5.62e-05	-0.000123379	0.00293506	1.06e-05	-1.53e-05	-2.04e-07	0.00157522	0.0120053	0.00296037	Alk	C3	NF	Allyl	North	1.33078	1.21338
CS76721	IP-Bra-0	ESP	42.5	-6.15	0.00134319	0.000164862	8.88e-06	-1.51e-05	3.46e-07	0.0030191	2.67e-07	-9.99e-07	-2.82e-07	5.38e-08	5.8e-10	1.82e-05	0.00104769	0.000384155	0.000473269	7.07e-06	0.00739602	0.000896717	8.76e-07	1.17e-08	0.00103164	0.0121909	9.86e-06	Alk	C3	NF	Allyl	South	1.03325	2.27462
CS76722	Bran-1	ROU	45.57	25.42	0.000816577	4.78e-07	8.88e-06	6.17e-05	3.46e-07	0.00172161	2.67e-07	-9.99e-07	-2.82e-07	5.38e-08	5.8e-10	1.56e-07	0.00042215	0.000189351	-3.22e-06	7.07e-06	0.0044693	0.000216572	8.76e-07	1.17e-08	0.00204282	0.0115787	9.86e-06	Alk	C3	F	Allyl	South	1.29903	0.25186
CS76725	BRI-2	FRA	50.68	3.52	0.000161797	4.78e-07	0.000980209	0.00366914	3.46e-07	-1.23e-05	2.67e-07	-9.99e-07	0.000213057	5.38e-08	5.8e-10	6e-05	2.42e-05	0.000673493	2.39e-05	0.00155128	0.00506813	0.000319739	0.000328676	1.17e-08	0.00246015	0.007435	9.86e-06	Alk	C4	F	OH-But	North	-3.34331	-0.371786
CS76726	Br??1-6	SWE	56.3	16	0.0011303	4.78e-07	8.88e-06	-1.51e-05	3.46e-07	0.00359167	2.67e-07	-9.99e-07	-2.82e-07	5.38e-08	5.8e-10	1.56e-07	0.000160843	0.000375613	0.000499345	7.07e-06	0.00809171	0.000793728	8.76e-07	1.17e-08	0.00238107	0.00728112	0.00145743	Alk	C3	NF	Allyl	North	1.08417	2.0889
CS76727	Br??sarp-11-135	SWE	55.7167	14.1333	0.000617008	4.78e-07	8.88e-06	-1.51e-05	3.46e-07	0.000176751	2.67e-07	-9.99e-07	5.17e-05	5.38e-08	5.8e-10	1.56e-07	3.89e-06	0.000192362	0.000398774	7.07e-06	0.00632476	0.000154313	8.76e-07	1.17e-08	0.000773232	0.00995223	0.00175837	OH	C3	NF	3OHP	North	0.701553	1.44209
CS76728	Br??sarp-15-138	SWE	55.7167	14.1333	0.0013197	0.000552384	8.88e-06	-1.51e-05	3.46e-07	-1.23e-05	2.67e-07	-9.99e-07	-2.82e-07	5.38e-08	5.8e-10	1.56e-07	0.006125	0.000159966	-3.22e-06	6.69e-05	0.00319811	4.47e-05	8.76e-07	1.17e-08	0.00250582	0.00675589	9.86e-06	MSO	C3	NF	3MSO	North	2.12566	-2.11589
CS76730	Br??sarp-34-145	SWE	55.7167	14.1333	0.000734628	-8.35e-06	-0.000154943	0.000263744	-6.04e-06	0.00114134	-4.66e-06	1.74e-05	4.93e-06	-9.4e-07	-1.01e-08	-2.72e-06	7.13e-05	8.53e-05	5.62e-05	-9.9e-05	0.00389355	0.00028061	-1.53e-05	-2.04e-07	0.00141225	0.00731875	0.00192416	Alk	C3	NF	Allyl	North	1.44378	0.602751
CS76734	Bur-0	IRL	53.08	-9.07556	0.000357611	4.78e-07	0.000305878	0.00127462	3.46e-07	0.000374237	2.67e-07	0.00131134	0.000423408	5.38e-08	5.8e-10	0.000119991	3.89e-06	0.00115152	0.000300357	0.00205055	0.00708054	4.69e-05	8.76e-07	5.26e-06	0.00180337	0.0142755	9.86e-06	Alk	C4	F	OH-But	North	-3.81037	2.25101
CS76736	IP-Bus-0	ESP	36.97	-3.28	0.00133097	9.31e-06	0.000172697	-0.000176378	6.73e-06	0.00172134	5.19e-06	-1.94e-05	-5.5e-06	1.05e-06	1.13e-08	3.03e-06	0.000233043	0.000235228	-6.26e-05	0.000137516	0.00521091	0.000387177	1.7e-05	2.28e-07	0.00416514	0.0142571	0.000191759	Alk	C3	F	Allyl	South	1.21857	0.196952
CS76738	IP-Cab-3	ESP	41.54	2.39	-5.52e-06	4.78e-07	0.000227378	0.00156509	3.46e-07	-1.23e-05	2.67e-07	-9.99e-07	0.000532159	5.38e-08	5.8e-10	1.56e-07	3.89e-06	0.000496044	-3.22e-06	0.00105064	0.00575269	0.00021502	8.76e-07	1.17e-08	0.0015555	0.0128083	0.00157004	Alk	C4	F	OH-But	South	-1.5017	1.99112
CS76739	IP-Cad-0	ESP	40.37	-5.74	0.000923075	4.78e-07	8.88e-06	-1.51e-05	3.46e-07	0.00124451	2.67e-07	-9.99e-07	5.48e-05	5.38e-08	5.8e-10	1.56e-07	0.000329657	0.000413794	-3.22e-06	7.18e-05	0.00839657	0.00032395	8.76e-07	1.17e-08	0.00173254	0.0136597	0.00170545	Alk	C3	NF	Allyl	South	0.675159	2.16605
CS76740	Can-0	ESP	29.2144	-13.4811	0.00254608	4.78e-07	8.88e-06	-1.51e-05	3.46e-07	-1.23e-05	2.67e-07	-9.99e-07	-2.82e-07	5.38e-08	5.8e-10	1.56e-07	0.000143711	0.000213971	-3.22e-06	0.000548007	0.00386752	0.000207586	8.76e-07	1.17e-08	0.0039453	0.00908765	9.86e-06	OH	C3	NF	3OHP	South	1.31043	-1.14214
CS76741	IP-Cap-1	ESP	36.97	-3.36	0.000817227	4.78e-07	8.88e-06	2.22e-05	3.46e-07	0.00147367	2.67e-07	-9.99e-07	-2.82e-07	5.38e-08	5.8e-10	1.56e-07	0.00014072	0.000157857	-3.22e-06	7.07e-06	0.00529667	0.000786027	8.76e-07	1.17e-08	0.00207009	0.0109706	0.00108192	Alk	C3	F	Allyl	South	1.19299	1.22356
CS76742	IP-Car-1	ESP	38.25	-4.32	0.000119904	4.78e-07	0.000682262	0.00583382	3.46e-07	9.44e-05	2.67e-07	0.000319478	0.00010123	5.38e-08	5.8e-10	3.32e-05	0.000475766	0.00043676	-3.22e-06	0.00143018	0.00689934	0.000530954	0.000242115	1.17e-08	0.00269795	0.0119546	9.86e-06	Alk	C4	F	OH-But	South	-2.52857	0.475041
CS76743	IP-Cas-0	ESP	38.54	-3.39	0.000446011	4.78e-07	0.000778332	0.00482854	3.46e-07	-1.23e-05	2.67e-07	0.000222435	0.000218022	5.38e-08	5.8e-10	0.00018345	2.62e-05	0.00102152	0.000215785	0.000356989	0.00900748	0.000170682	0.0001774	1.17e-08	0.00341355	0.010272	9.86e-06	Alk	C4	F	OH-But	South	-4.56433	1.3271
CS76744	Castelfed-1-195	ITA	46.3378	11.2928	0.0017897	4.78e-07	8.88e-06	-1.51e-05	3.46e-07	0.00505294	2.67e-07	7.76e-05	2.23e-05	5.38e-08	5.8e-10	1.56e-07	0.00048224	0.000151809	0.00070061	6.24e-05	0.00283334	0.000251814	8.76e-07	1.17e-08	0.00173585	0.00903209	0.00174553	Alk	C3	NF	Allyl	South	1.89839	1.17778
CS76745	Castelfed-1-196	ITA	46.3378	11.2928	0.0012049	4.78e-07	8.88e-06	-1.51e-05	3.46e-07	0.00292122	2.67e-07	-9.99e-07	4.82e-05	5.38e-08	5.8e-10	1.56e-07	0.000281338	0.000124292	0.000411889	2.68e-05	0.00234004	0.00024963	8.76e-07	1.17e-08	0.00246778	0.00737217	0.00171269	Alk	C3	NF	Allyl	South	1.51748	0.302075
CS76746	Castelfed-1-197	ITA	46.3378	11.2928	0.00166258	4.78e-07	8.88e-06	-1.51e-05	3.46e-07	0.00452348	2.67e-07	4.53e-05	2.68e-05	5.38e-08	5.8e-10	1.56e-07	0.000318921	0.000180012	0.000542209	7.72e-05	0.00288334	0.000286154	8.76e-07	1.17e-08	0.000801425	0.00678749	9.86e-06	Alk	C3	NF	Allyl	South	1.62671	0.432582
CS76747	Castelfed-1-198	ITA	46.3378	11.2928	0.00147813	4.78e-07	8.88e-06	-1.51e-05	3.46e-07	0.00388568	2.67e-07	5.06e-05	2.07e-05	5.38e-08	5.8e-10	1.56e-07	0.000289175	0.000139843	-3.22e-06	2.94e-05	0.00249608	0.000236391	8.76e-07	1.17e-08	0.00352404	0.0114722	9.86e-06	Alk	C3	NF	Allyl	South	1.89089	-0.239016
CS76748	Castelfed-1-199	ITA	46.3378	11.2928	0.00127816	4.78e-07	8.88e-06	-1.51e-05	0.00119779	0.00106376	2.67e-07	-9.99e-07	-2.82e-07	5.38e-08	5.8e-10	1.56e-07	0.000112777	9.46e-05	-3.22e-06	3.36e-05	0.00181333	0.000118244	8.76e-07	1.17e-08	0.00308763	0.00763338	9.86e-06	Alk	C3	NF	Allyl	South	0.737627	-2.31386
CS76749	Castelfed-2-200	ITA	46.3378	11.2928	0.00119228	4.78e-07	8.88e-06	-1.51e-05	3.46e-07	0.00132914	2.67e-07	-9.99e-07	7e-05	5.38e-08	5.8e-10	1.56e-07	0.00073076	0.000360485	0.000281533	0.000131653	0.0059671	0.000390242	8.76e-07	1.17e-08	0.00178655	0.0107279	0.00272789	Alk	C3	NF	Allyl	South	0.821875	1.88334
CS76750	Castelfed-2-201	ITA	46.3378	11.2928	0.000905307	4.78e-07	8.88e-06	-1.51e-05	3.46e-07	0.00173855	2.67e-07	-9.99e-07	5.16e-05	5.38e-08	5.8e-10	1.56e-07	0.00070933	0.000357991	0.000186486	9.27e-05	0.00635495	0.000343596	8.76e-07	1.17e-08	0.00173862	0.0113541	0.00108308	Alk	C3	NF	Allyl	South	0.882486	1.42443
CS76751	Castelfed-2-202	ITA	46.3378	11.2928	0.00174058	4.78e-07	8.88e-06	-1.51e-05	3.46e-07	0.00260597	2.67e-07	-9.99e-07	0.000102436	5.38e-08	5.8e-10	1.56e-07	0.000199321	0.000220847	0.000424901	5.03e-05	0.0068562	0.000286345	8.76e-07	1.17e-08	0.00201735	0.0147968	0.00341108	Alk	C3	NF	Allyl	South	1.26377	2.8191
CS76752	Castelfed-2-203	ITA	46.3378	11.2928	0.00140749	4.78e-07	8.88e-06	-1.51e-05	3.46e-07	0.00191774	2.67e-07	-9.99e-07	3.47e-05	5.38e-08	5.8e-10	1.56e-07	0.00128363	0.000287123	0.000259888	0.00013894	0.00606377	0.000539655	8.76e-07	1.17e-08	0.00184846	0.0131	0.0029837	Alk	C3	NF	Allyl	South	1.24346	2.27994
CS76754	Castelfed-3-205	ITA	46.3378	11.2928	0.00129105	-8.35e-06	-0.000154943	0.000263744	-6.04e-06	0.00176383	-4.66e-06	1.74e-05	4.93e-06	-9.4e-07	-1.01e-08	-2.72e-06	0.000140494	8.52e-05	5.62e-05	-7.74e-05	0.00199979	0.000211718	-1.53e-05	-2.04e-07	0.00295792	0.00613695	-0.000172045	Alk	C3	NF	Allyl	South	1.77121	-1.06212
CS76755	Castelfed-3-206	ITA	46.3378	11.2928	0.00249408	0.00046594	8.88e-06	5.34e-05	3.46e-07	0.00422159	2.67e-07	-9.99e-07	-2.82e-07	5.38e-08	5.8e-10	1.56e-07	0.00157733	0.0002067	-3.22e-06	3.63e-05	0.00293875	0.000297877	7.31e-05	1.17e-08	0.00468901	0.0100495	9.86e-06	Alk	C3	F	Allyl	South	2.25455	-1.04463
CS76756	Castelfed-3-207	ITA	46.3378	11.2928	0.00120058	4.78e-07	8.88e-06	0.000121227	0.000375921	0.000909319	2.67e-07	-9.99e-07	-2.82e-07	5.38e-08	5.8e-10	1.56e-07	6.82e-05	0.000232512	-3.22e-06	0.000270611	0.00446328	8.57e-05	8.76e-07	1.17e-08	0.00183979	0.00713297	0.000756665	Alk	C3	F	Allyl	South	0.773943	-0.578548
CS76757	Castelfed-3-208	ITA	46.3378	11.2928	0.00280451	8.11e-05	8.88e-06	-1.51e-05	3.46e-07	0.00388697	2.67e-07	-9.99e-07	2.54e-05	5.38e-08	5.8e-10	1.56e-07	0.0011741	0.000247627	0.000519112	0.000102014	0.00383035	0.000357561	8.76e-07	1.17e-08	0.00472953	0.0118548	9.86e-06	Alk	C3	NF	Allyl	South	2.10169	-0.00107746
CS76758	Castelfed-3-209	ITA	46.3378	11.2928	0.00404308	8.6e-05	0.000190145	0.000102789	3.46e-07	0.00430138	2.67e-07	-9.99e-07	3.2e-05	5.38e-08	5.8e-10	1.56e-07	0.00143224	0.000267066	-3.22e-06	7.35e-05	0.00374675	0.000343033	8.76e-07	1.17e-08	0.00662491	0.0118708	9.86e-06	Alk	C3	F	Allyl	South	2.40112	-1.06183
CS76759	IP-Cat-0	ESP	40.54	-3.69	0.00149648	4.78e-07	8.88e-06	0.00045744	3.46e-07	0.00303864	2.67e-07	0.000148092	-2.82e-07	5.38e-08	5.8e-10	1.56e-07	0.000756254	0.000342275	0.000760744	0.000255362	0.00754195	0.000246692	8.76e-07	1.17e-08	0.00320858	0.00802175	9.86e-06	Alk	C3	F	Allyl	South	1.1397	0.760143
CS76760	CATS-6	FRA	50.79	2.69	0.000467424	3.42e-06	0.000529415	0.00159041	2.47e-06	0.00090321	1.91e-06	-7.14e-06	0.000163643	3.85e-07	4.15e-09	1.18e-05	0.000169056	0.000339595	0.000291605	0.000512495	0.00456988	0.000315982	7.78e-05	8.37e-08	0.00224947	0.00903935	0.000806995	Alk	C4	F	OH-But	North	-0.636272	0.441788
CS76762	IP-Cdo-0	ESP	42.23	-4.64	0.000278115	-8.35e-06	-0.000154943	0.000263744	-6.04e-06	0.000354515	-4.66e-06	1.74e-05	6.27e-05	-9.4e-07	-1.01e-08	-2.72e-06	-6.79e-05	0.000262849	5.62e-05	-0.000123379	0.00717234	1.06e-05	-1.53e-05	-2.04e-07	0.000495117	0.00970276	-0.000172045	Alk	C3	NF	Allyl	South	0.741478	0.893911
CS76763	IP-Cem-0	ESP	41.15	-4.32	0.00018359	4.78e-07	8.88e-06	-1.51e-05	3.46e-07	0.000335284	2.67e-07	0.00082536	-2.82e-07	5.38e-08	5.8e-10	4.62e-05	0.00291975	0.00041852	-3.22e-06	0.000481207	0.00753654	0.000216874	0.000127825	1.17e-08	0.000527702	0.0103851	0.00184862	Alk	C3	NF	Allyl	South	-0.224602	1.33954
CS76764	IP-Cha-0	ESP	40.38	-4.21	0.00057894	4.78e-07	8.88e-06	7.66e-05	3.46e-07	0.000477851	2.67e-07	-9.99e-07	7.61e-05	5.38e-08	5.8e-10	1.56e-07	6.18e-05	0.000175126	-3.22e-06	7.07e-06	0.00582299	0.000554422	8.76e-07	1.17e-08	0.0016652	0.0119353	9.86e-06	Alk	C3	F	Allyl	South	0.7804	0.945346
CS76768	IP-Cho-0	ESP	40.51	-3.9	0.00117388	4.78e-07	8.88e-06	-1.51e-05	3.46e-07	0.00160586	2.67e-07	-9.99e-07	6.31e-05	5.38e-08	5.8e-10	1.56e-07	0.000129099	0.0004142	-3.22e-06	6.18e-05	0.00780632	0.000141023	8.76e-07	1.17e-08	0.00260985	0.0173865	0.0024555	Alk	C3	NF	Allyl	South	0.888831	2.46363
CS76769	Choto-1	BUL	41.5	23.33	0.000728565	9.31e-06	0.000172697	0.00140573	6.73e-06	0.00138893	5.19e-06	0.000341808	-5.5e-06	1.05e-06	1.13e-08	3.03e-06	7.57e-05	0.000291264	-6.26e-05	0.000137516	0.00606158	0.000160349	1.7e-05	2.28e-07	0.00303987	0.0137294	0.000191759	Alk	C3	F	Allyl	South	0.433631	0.466083
CS76770	CIBC-17	UK	51.4083	-0.6383	0.000460477	0.000267675	8.88e-06	5.3e-05	3.46e-07	0.00330243	2.67e-07	-9.99e-07	-2.82e-07	5.38e-08	5.8e-10	1.56e-07	0.00290681	0.000184676	-3.22e-06	4.22e-05	0.00459358	0.000236474	8.76e-07	1.17e-08	0.000410221	0.00709343	0.000502022	Alk	C3	F	Allyl	North	1.70126	0.151487
CS76771	Cimin-1	ITA	39.58	16.21	9.37e-05	4.78e-07	0.00129284	0.00310145	3.46e-07	-1.23e-05	2.67e-07	0.000770413	-2.82e-07	5.38e-08	5.8e-10	1.56e-07	0.000684855	0.000297019	0.000194271	0.00263296	0.00276445	0.000237881	0.000364674	1.17e-08	0.00386909	0.00899875	9.86e-06	Alk	C4	F	OH-But	South	-2.05563	-1.93701
CS76772	IP-Cir-0	ESP	40.61	-6.57	0.000329598	4.78e-07	0.000813231	0.000670468	3.46e-07	0.000758429	2.67e-07	0.000596584	-2.82e-07	5.38e-08	5.8e-10	4.24e-05	3.89e-06	0.000604616	3.92e-05	0.00270752	0.00662132	0.000147339	0.000215907	1.17e-08	0.000866237	0.00943616	0.00179389	Alk	C4	F	OH-But	South	-1.90233	0.79245
CS76774	IP-Cmo-3	ESP	40.05	-4.65	0.0019044	4.78e-07	8.88e-06	-1.51e-05	3.46e-07	0.00251079	2.67e-07	-9.99e-07	8.03e-05	5.38e-08	5.8e-10	1.56e-07	0.000399538	0.000220775	-3.22e-06	7.27e-05	0.00862279	0.000258106	8.76e-07	1.17e-08	0.00125925	0.014653	0.000866958	Alk	C3	NF	Allyl	South	1.27809	1.96052
CS76775	IP-Coa-0	POR	38.45	-7.5	-0.000107343	9.31e-06	0.000172697	0.00673707	6.73e-06	-0.000240156	5.19e-06	0.000316745	0.000227385	1.05e-06	1.13e-08	7.85e-05	7.57e-05	0.000583132	0.000190877	0.00135601	0.00517747	0.000580742	0.000324218	2.28e-07	0.00377943	0.0123612	0.000191759	Alk	C4	F	OH-But	South	-3.61379	0.677017
CS76776	IP-Coc-1	ESP	42.31	3.19	0.000198359	-8.35e-06	0.000439046	0.0016147	-6.04e-06	0.000215467	-4.66e-06	0.000420225	0.000208105	-9.4e-07	-1.01e-08	-2.72e-06	-6.79e-05	0.000846511	5.62e-05	0.000362709	0.0129895	2.54e-05	-1.53e-05	-2.04e-07	0.00265959	0.01329	-0.000172045	Alk	C4	F	OH-But	South	-1.35096	2.27342
CS76777	IP-Cod-0	ESP	41.25	-1.32	0.000621444	-8.35e-06	-0.000154943	0.000263744	-6.04e-06	0.00176804	-4.66e-06	1.74e-05	0.000108059	-9.4e-07	-1.01e-08	-2.72e-06	0.000139293	0.000121742	5.62e-05	-0.000123379	0.00259056	0.000140087	-1.53e-05	-2.04e-07	0.00137114	0.0128073	0.00319921	Alk	C3	NF	Allyl	South	1.38309	1.67504
CS76780	IP-Con-0	ESP	37.94	-5.6	0.000298286	4.78e-07	0.000482156	0.00271636	3.46e-07	0.00088737	2.67e-07	0.00106856	-2.82e-07	5.38e-08	5.8e-10	3.17e-05	3.44e-05	0.000399412	3.94e-05	0.00249907	0.00444149	0.000223179	8.76e-07	1.17e-08	0.00132617	0.0106216	0.00128966	Alk	C4	F	OH-But	South	-1.20604	0.627518
CS76782	IP-Cor-0	ESP	40.83	-2	0.00135856	-8.35e-06	1.93e-06	0.0004429	-6.04e-06	0.00364892	-4.66e-06	1.74e-05	9.97e-05	-9.4e-07	-1.01e-08	-2.72e-06	0.000102308	0.000121721	5.62e-05	-8.27e-05	0.00376737	1.06e-05	-1.53e-05	-2.04e-07	0.0027447	0.0110991	0.00320581	Alk	C3	F	Allyl	South	1.707	1.26583
CS76784	IP-Cot-0	ESP	41.83	-5.38	0.0019616	4.78e-07	8.88e-06	-1.51e-05	3.46e-07	0.00323536	2.67e-07	-9.99e-07	4.67e-05	5.38e-08	5.8e-10	1.56e-07	0.000480337	0.000206973	-3.22e-06	7.07e-06	0.00682238	0.000187855	8.76e-07	1.17e-08	0.00327214	0.0123034	9.86e-06	Alk	C3	NF	Allyl	South	1.65687	0.519248
CS76785	IP-Coy-0	ESP	40.44	-4.27	0.000338738	9.7e-05	-0.000154943	0.000263744	-6.04e-06	0.000898518	-4.66e-06	1.74e-05	5.06e-05	-9.4e-07	-1.01e-08	7.19e-05	7.41e-05	0.000768523	5.62e-05	-0.000123379	0.0248845	0.000246222	3.26e-05	-2.04e-07	0.000537717	0.0116634	-0.000172045	Alk	C3	NF	Allyl	South	-1.07758	4.87025
CS76786	Ct-1	ITA	37.3	15	0.00504159	4.78e-07	8.88e-06	-1.51e-05	3.46e-07	-1.23e-05	2.67e-07	-9.99e-07	-2.82e-07	5.38e-08	5.8e-10	1.56e-07	0.00037191	0.000104493	-3.22e-06	0.000539074	0.00253248	0.000233629	8.76e-07	1.17e-08	0.0057455	0.00927542	9.86e-06	OH	C3	NF	3OHP	South	2.11615	-2.24694
CS76787	IP-Cum-1	ESP	38.07	-6.66	-0.000107343	9.31e-06	0.000172697	0.00309685	6.73e-06	-0.000240156	5.19e-06	0.000193304	6.06e-05	1.05e-06	1.13e-08	4.68e-05	0.000169182	0.000513894	-6.26e-05	0.00447069	0.00454536	0.000158132	0.000575996	2.28e-07	0.00276379	0.00824123	0.000191759	Alk	C4	F	OH-But	South	-3.14252	-1.36988
CS76790	CYR	FRA	47.4	0.683333	0.000115772	4.78e-07	0.00180139	0.00619794	3.46e-07	-1.23e-05	2.73e-05	0.000140173	0.000157751	5.38e-08	5.8e-10	6.69e-05	3.89e-06	0.000541091	0.000196553	0.00374455	0.00351047	0.000220874	0.000546857	1.17e-08	0.00406934	0.00721502	9.86e-06	Alk	C4	F	OH-But	North	-5.36405	-2.40191
CS76791	Da-0	GER	49.8724	8.65081	0.000299782	4.78e-07	0.00201438	-1.51e-05	0.000181969	-1.23e-05	2.67e-07	-9.99e-07	-2.82e-07	2.74e-05	5.8e-10	1.56e-07	3.05e-05	0.000340632	-3.22e-06	0.00698101	0.00364561	0.000329043	0.000648019	1.17e-08	0.00359572	0.00563819	9.86e-06	MSO	C4	NF	4MSO	North	-3.69214	-3.4523
CS76792	IP-Dar-0	ESP	41.13	-1.43	0.000728744	-8.35e-06	-0.000154943	0.000263744	-6.04e-06	0.00186182	-4.66e-06	1.74e-05	7.46e-05	-9.4e-07	-1.01e-08	-2.72e-06	-2.09e-05	0.000109088	5.62e-05	-0.000123379	0.00691432	0.000371118	-1.53e-05	-2.04e-07	0.000760574	0.013416	-0.000172045	Alk	C3	NF	Allyl	South	1.31302	1.62987
CS76793	IP-Deh-1	ESP	40.29	-6.67	0.000402193	4.78e-07	0.000211613	0.00274448	3.46e-07	0.000462521	2.67e-07	7.69e-05	0.000261624	2.37e-05	5.8e-10	2.26e-05	4.41e-05	0.00058528	7.89e-05	0.00110138	0.00769271	0.000222151	8.76e-07	1.17e-08	0.000867555	0.0100453	0.00143951	Alk	C4	F	OH-But	South	-1.84818	1.97865
CS76796	DIR-9	FRA	48.54	4.32	0.000101763	4.78e-07	0.000813735	0.00171696	3.46e-07	-1.23e-05	2.67e-07	0.000102323	0.000120376	5.38e-08	5.8e-10	5.96e-05	3.89e-06	0.000514567	0.000136111	0.00148498	0.00343049	0.000279904	0.000330312	1.17e-08	0.00289638	0.00741124	9.86e-06	Alk	C4	F	OH-But	North	-2.33167	-0.916196
CS76802	Dolen-1	BUL	41.62	23.94	0.000248219	9.31e-06	0.000172697	0.00570718	6.73e-06	0.000576656	5.19e-06	0.000898983	6.18e-05	1.05e-06	1.13e-08	4.72e-05	7.57e-05	0.000565175	0.000186913	0.00104211	0.00447668	0.000135677	0.000232574	2.28e-07	0.00371265	0.0107481	0.000191759	Alk	C4	F	OH-But	South	-2.41753	-0.128383
CS76803	Dolna-1-10	BUL	42.32	23.1	0.0012607	4.78e-07	8.88e-06	9.07e-05	3.46e-07	0.00460756	2.67e-07	-9.99e-07	-2.82e-07	5.38e-08	5.8e-10	1.56e-07	6.49e-05	0.000122939	-3.22e-06	2.26e-05	0.00412425	0.000186969	8.76e-07	1.17e-08	0.00317753	0.0122207	9.86e-06	Alk	C3	F	Allyl	South	1.95086	0.280532
CS76804	Dolna-1-39	BUL	42.32	23.1	0.00304478	0.00043936	0.000172697	0.000136632	6.73e-06	0.00897629	5.19e-06	3.81e-05	-5.5e-06	1.05e-06	1.13e-08	3.03e-06	0.00202052	0.000280018	-6.26e-05	0.000137516	0.00472451	0.000315169	1.7e-05	2.28e-07	0.00216695	0.00698183	0.000191759	Alk	C3	F	Allyl	South	2.58136	0.0394163
CS76805	Dolna-1-40	BUL	42.32	23.1	0.000865239	4.78e-07	8.88e-06	5.16e-05	3.46e-07	0.00575401	2.67e-07	-9.99e-07	1.97e-05	5.38e-08	5.8e-10	1.56e-07	7e-05	0.000225389	-3.22e-06	2.2e-05	0.00598206	0.000187372	8.76e-07	1.17e-08	0.00172918	0.0119922	9.86e-06	Alk	C3	F	Allyl	South	1.70518	1.25772
CS76807	Dospa-1	BUL	41.64	24.18	0.00167425	4.78e-07	9.77e-05	0.00015712	3.46e-07	0.00204026	2.67e-07	-9.99e-07	-2.82e-07	5.38e-08	5.8e-10	1.56e-07	0.000426337	0.000129665	-3.22e-06	7.07e-06	0.00378435	0.000255803	8.76e-07	1.17e-08	0.00263884	0.00816253	9.86e-06	Alk	C3	F	Allyl	South	1.50996	-0.581543
CS76809	Dra1-4	SWE	55.76	14.12	0.000798308	-8.35e-06	-0.000154943	0.000263744	-6.04e-06	0.000557936	-4.66e-06	1.74e-05	4.93e-06	-9.4e-07	-1.01e-08	-2.72e-06	-8.3e-06	7.44e-05	5.62e-05	-1.77e-05	0.00295602	1.06e-05	-1.53e-05	-2.04e-07	0.00358396	0.00954068	-0.000172045	Alk	C3	NF	Allyl	North	1.59117	-0.91644
CS76811	Dra3-1	SWE	55.76	14.12	0.00146378	0.000177425	-0.000154943	0.000263744	-6.04e-06	0.000215467	-4.66e-06	1.74e-05	4.93e-06	-9.4e-07	-1.01e-08	-2.72e-06	0.00280076	0.000255466	5.62e-05	1.92e-05	0.00354966	3.77e-05	-1.53e-05	-2.04e-07	0.00224261	0.00954922	0.00307327	Alk	C3	NF	Allyl	North	1.71081	0.303864
CS76812	Draha2	CZE	49.4112	16.2815	0.00253609	4.78e-07	8.88e-06	-1.51e-05	3.46e-07	-1.23e-05	2.67e-07	-9.99e-07	-2.82e-07	5.38e-08	5.8e-10	1.56e-07	4.42e-05	0.000131463	-3.22e-06	6.84e-05	0.00261882	0.000221409	8.76e-07	1.17e-08	0.00551668	0.0104917	9.86e-06	OH	C3	NF	3OHP	North	1.65671	-1.55285
CS76813	DraII-1	CZE	49.4112	16.2815	0.00390368	4.78e-07	8.88e-06	-1.51e-05	3.46e-07	-1.23e-05	2.67e-07	-9.99e-07	-2.82e-07	5.38e-08	5.8e-10	1.56e-07	0.000424215	0.000202232	-3.22e-06	0.000101591	0.0031899	0.000254811	8.76e-07	1.17e-08	0.00294725	0.00622922	0.00110787	OH	C3	NF	3OHP	North	1.57976	-1.12524
CS76814	DraII-6	CZE	49.4112	16.2815	0.00333234	4.78e-07	8.88e-06	-1.51e-05	3.46e-07	-1.23e-05	2.67e-07	-9.99e-07	-2.82e-07	5.38e-08	5.8e-10	1.56e-07	0.000342446	0.000185841	-3.22e-06	8.03e-05	0.00309793	9.37e-05	8.76e-07	1.17e-08	0.00351814	0.0106787	9.86e-06	OH	C3	NF	3OHP	North	1.6254	-1.17997
CS76815	DraIII-1	CZE	49.4112	16.2815	0.00252454	4.78e-07	8.88e-06	-1.51e-05	3.46e-07	-1.23e-05	2.67e-07	-9.99e-07	-2.82e-07	5.38e-08	5.8e-10	1.56e-07	0.000119502	0.000140754	-3.22e-06	9.24e-05	0.00302116	0.000112651	8.76e-07	1.17e-08	0.00389656	0.0109822	9.86e-06	OH	C3	NF	3OHP	North	1.54953	-1.13131
CS76816	DraIV 1-11	CZE	49.4112	16.2815	0.0014791	4.78e-07	8.88e-06	2.74e-05	3.46e-07	-1.23e-05	2.67e-07	-9.99e-07	-2.82e-07	5.38e-08	5.8e-10	1.56e-07	9.07e-05	8.61e-05	-3.22e-06	7.07e-06	0.00168996	9.9e-05	8.76e-07	1.17e-08	0.00248081	0.00718836	9.86e-06	OH	C3	F	3OHP	North	1.32416	-1.39514
CS76817	DraIV 1-8	CZE	49.4112	16.2815	0.00472184	4.78e-07	8.88e-06	-1.51e-05	3.46e-07	-1.23e-05	2.67e-07	-9.99e-07	-2.82e-07	5.38e-08	5.8e-10	1.56e-07	0.000242578	0.000224216	-3.22e-06	8.48e-05	0.00387675	0.000192492	8.76e-07	1.17e-08	0.00483364	0.00944664	9.86e-06	OH	C3	NF	3OHP	North	1.83609	-1.58396
CS76818	DraIV 2-9	CZE	49.4112	16.2815	0.00262598	4.78e-07	8.88e-06	-1.51e-05	3.46e-07	-1.23e-05	2.67e-07	-9.99e-07	-2.82e-07	5.38e-08	5.8e-10	1.56e-07	0.000120582	0.000172746	-3.22e-06	7.22e-05	0.00322808	6.86e-05	8.76e-07	1.17e-08	0.00433197	0.00898868	9.86e-06	OH	C3	NF	3OHP	North	1.51535	-1.48705
CS76819	DraIV 3-7	CZE	49.4112	16.2815	0.00695207	4.78e-07	8.88e-06	5.08e-05	3.46e-07	-1.23e-05	2.67e-07	-9.99e-07	-2.82e-07	5.38e-08	5.8e-10	1.56e-07	0.000929757	0.000209015	-3.22e-06	0.000123993	0.00321779	0.000225561	8.76e-07	1.17e-08	0.00497113	0.00886978	9.86e-06	OH	C3	F	3OHP	North	2.34514	-2.18935
CS76820	DraIV 5-12	CZE	49.4112	16.2815	0.00291099	0.000212969	8.88e-06	0.000127043	3.46e-07	5.92e-05	2.67e-07	-9.99e-07	-2.82e-07	5.38e-08	5.8e-10	1.56e-07	0.00121632	0.000325764	-3.22e-06	7.45e-05	0.00480525	0.000357371	8.76e-07	1.17e-08	0.00540409	0.00894583	9.86e-06	OH	C3	F	3OHP	North	1.5179	-1.29773
CS76822	DraIV 6-13	CZE	49.4112	16.2815	0.00306704	4.78e-07	8.88e-06	-1.51e-05	3.46e-07	-1.23e-05	2.67e-07	-9.99e-07	-2.82e-07	5.38e-08	5.8e-10	1.56e-07	2.27e-05	0.000104512	-3.22e-06	7.07e-06	0.00221827	2.55e-05	8.76e-07	1.17e-08	0.00264509	0.00524713	9.86e-06	OH	C3	NF	3OHP	North	1.55306	-1.87037
CS76823	DraIV 6-22	CZE	49.4112	16.2815	0.00151019	4.78e-07	8.88e-06	-1.51e-05	3.46e-07	-1.23e-05	2.67e-07	-9.99e-07	-2.82e-07	5.38e-08	5.8e-10	1.56e-07	6.8e-05	0.000128414	-3.22e-06	5.58e-05	0.00194805	0.000211173	8.76e-07	1.17e-08	0.00389015	0.00853713	9.86e-06	OH	C3	NF	3OHP	North	1.35896	-1.38264
CS76824	Duk	CZE	49.1	16.2	0.00769875	4.78e-07	8.88e-06	-1.51e-05	3.46e-07	-1.23e-05	2.67e-07	-9.99e-07	-2.82e-07	5.38e-08	5.8e-10	1.56e-07	0.000279776	0.000179645	3.59e-05	0.00011343	0.00351601	0.000364466	8.76e-07	1.17e-08	0.00577617	0.0110649	9.86e-06	OH	C3	NF	3OHP	North	2.51859	-1.94162
CS76828	Eden-6	SWE	62.877	18.177	0.00071126	-8.35e-06	-0.000154943	0.000263744	-6.04e-06	0.00103476	-4.66e-06	1.74e-05	5.58e-05	-9.4e-07	-1.01e-08	-2.72e-06	-6.79e-05	0.000116082	5.62e-05	-0.000123379	0.00499646	0.00030164	-1.53e-05	-2.04e-07	0.00210084	0.0121633	-0.000172045	Alk	C3	NF	Allyl	North	1.33621	0.623826
CS76830	Eden-9	SWE	62.877	18.177	0.00123132	-8.35e-06	-0.000154943	0.000263744	-6.04e-06	0.00191952	-4.66e-06	1.74e-05	4.97e-05	-9.4e-07	-1.01e-08	-2.72e-06	-1.33e-05	0.000120188	5.62e-05	-0.000123379	0.00602274	0.000347152	-1.53e-05	-2.04e-07	0.00344406	0.0107896	-0.000172045	Alk	C3	NF	Allyl	North	1.60979	0.36828
CS76831	Edi-0	UK	55.9494	-3.16028	0.000919633	4.78e-07	8.88e-06	0.000102671	3.46e-07	0.00143904	2.67e-07	-9.99e-07	4.24e-05	5.38e-08	5.8e-10	1.56e-07	0.000712102	0.000192155	-3.22e-06	6.77e-05	0.00534827	0.000410901	8.76e-07	1.17e-08	0.00185402	0.0123535	9.86e-06	Alk	C3	F	Allyl	North	1.15306	0.699505
CS76832	Edi-1	UK	55.9681	-3.21833	-5.52e-06	4.78e-07	0.000815876	0.00254989	3.46e-07	-1.23e-05	2.67e-07	7.35e-05	0.000190287	5.38e-08	5.8e-10	0.00020289	3.89e-06	0.000706354	0.000150015	0.000280874	0.00741099	0.000252701	0.000129141	1.17e-08	0.00195775	0.0129232	9.86e-06	Alk	C4	F	OH-But	North	-3.65713	1.58289
CS76835	Eds-9	SWE	62.9	18.4	0.00174012	4.78e-07	8.88e-06	-1.51e-05	3.46e-07	0.00275455	2.67e-07	-9.99e-07	6.17e-05	5.38e-08	5.8e-10	1.56e-07	7e-05	0.000345898	0.000463941	2.28e-05	0.00775395	0.000329189	8.76e-07	1.17e-08	0.00123878	0.0108525	0.00147763	Alk	C3	NF	Allyl	North	1.01114	2.15042
CS76836	IP-Ees-0	ESP	40.59	-4.15	0.00102189	4.78e-07	8.88e-06	-1.51e-05	3.46e-07	0.000839865	2.67e-07	-9.99e-07	3.26e-05	5.38e-08	5.8e-10	1.56e-07	0.000192017	0.000118187	-3.22e-06	7.07e-06	0.00475328	0.000412907	8.76e-07	1.17e-08	0.00191909	0.0122542	0.00113965	Alk	C3	NF	Allyl	South	1.2072	0.862802
CS76837	EkS 2	SWE	57.6781	14.9986	0.00110894	4.78e-07	8.88e-06	-1.51e-05	3.46e-07	0.00153881	2.67e-07	-9.99e-07	-2.82e-07	5.38e-08	5.8e-10	1.56e-07	0.000597279	0.000303087	-3.22e-06	7.07e-06	0.00700588	0.000402321	8.76e-07	1.17e-08	0.00226952	0.0139793	9.86e-06	Alk	C3	NF	Allyl	North	1.1569	1.13431
CS76838	IP-Elb-0	ESP	41.81	2.34	0.000237087	-8.35e-06	0.000151699	0.000717323	-6.04e-06	0.000442389	-4.66e-06	0.000209148	4.93e-06	-9.4e-07	-1.01e-08	3.86e-05	-6.79e-05	0.000222185	5.62e-05	-0.000123379	0.0041595	1.06e-05	-1.53e-05	-2.04e-07	0.00109866	0.00618989	-0.000172045	Alk	C4	F	OH-But	South	0.281279	-0.350928
CS76840	IP-Elp-0	ESP	40.53	-3.92	0.00116515	4.78e-07	8.88e-06	-1.51e-05	3.46e-07	0.00103871	2.67e-07	-9.99e-07	4.86e-05	5.38e-08	5.8e-10	1.56e-07	0.000191765	0.000254709	2.51e-05	3.47e-05	0.00842835	0.000253774	8.76e-07	1.17e-08	0.00173488	0.0121288	0.000746151	Alk	C3	NF	Allyl	South	0.915533	1.38251
CS76841	En-1	GER	50	8.5	0.00632441	4.78e-07	8.88e-06	-1.51e-05	3.46e-07	-1.23e-05	2.67e-07	-9.99e-07	-2.82e-07	5.38e-08	5.8e-10	1.56e-07	0.000616247	0.000121825	-3.22e-06	0.000712354	0.00320872	0.000313573	8.76e-07	1.17e-08	0.00577661	0.0101812	9.86e-06	OH	C3	NF	3OHP	North	2.3171	-2.16144
CS76844	Epidauros-1	GRC	37.6	23.08	-5.52e-06	4.78e-07	0.000971292	0.00130874	3.46e-07	-1.23e-05	2.67e-07	0.00010636	-2.82e-07	5.38e-08	5.8e-10	1.33e-05	0.000457726	0.000433534	-3.22e-06	0.00905345	0.00766713	2.33e-05	0.000313982	1.17e-08	0.00103555	0.0100946	0.00156986	Alk	C4	F	OH-But	South	-2.76939	-0.517158
CS76845	Erg2-6	GER	48.5	8.8	0.00168803	4.78e-07	8.88e-06	-1.51e-05	3.46e-07	0.00141803	2.67e-07	-9.99e-07	-2.82e-07	5.38e-08	5.8e-10	1.56e-07	0.000571161	0.000141362	-3.22e-06	7.07e-06	0.00315014	0.000146823	8.76e-07	1.17e-08	0.00435081	0.0114125	9.86e-06	Alk	C3	NF	Allyl	North	1.71371	-0.862553
CS76846	IP-Esn-2	ESP	42.27	0.19	0.00105467	4.78e-07	8.88e-06	3.94e-05	3.46e-07	0.00394422	2.67e-07	-9.99e-07	0.000110345	5.38e-08	5.8e-10	1.56e-07	8.18e-05	0.000303783	0.000359567	7.07e-06	0.00821366	0.000561538	8.76e-07	1.17e-08	0.000931829	0.0142827	0.00125899	Alk	C3	F	Allyl	South	1.01932	3.10962
CS76847	ESP-1-11	FRA	50.72	3.47	0.000194828	4.78e-07	0.0016661	0.00618087	3.46e-07	-1.23e-05	2.67e-07	4.19e-05	0.000347752	5.38e-08	5.8e-10	8.63e-05	3.89e-06	0.00071653	0.000189339	0.00375318	0.00415616	0.000268234	0.000628646	1.17e-08	0.0041892	0.0095116	9.86e-06	Alk	C4	F	OH-But	North	-5.78335	-1.24931
CS76848	IP-Evs-0	ESP	40.48	-3.96	0.000867828	4.78e-07	8.88e-06	1.95e-05	0.000428126	0.000851639	2.67e-07	-9.99e-07	-2.82e-07	5.38e-08	5.8e-10	1.56e-07	0.000193847	0.000151516	-3.22e-06	7.07e-06	0.00774319	0.000240335	8.76e-07	1.17e-08	0.00160382	0.0158402	0.00133203	Alk	C3	F	Allyl	South	0.915247	1.43789
CS76850	F??b-2	SWE	63.0165	18.3174	0.00087034	-8.35e-06	-0.000154943	0.000263744	-6.04e-06	0.00196853	-4.66e-06	1.74e-05	0.00012695	-9.4e-07	2.13e-05	-2.72e-06	0.000113127	0.000452725	5.62e-05	-0.000123379	0.01752	0.000281656	-1.53e-05	-2.04e-07	0.000984942	0.0132742	-0.000172045	Alk	C3	NF	Allyl	North	0.157538	4.81886
CS76851	F??b-4	SWE	63.0165	18.3174	0.000680185	-8.35e-06	-0.000154943	0.000263744	-6.04e-06	0.00415888	-4.66e-06	0.000145298	4.93e-06	-9.4e-07	1.38e-05	3.45e-05	-6.79e-05	0.000316848	5.62e-05	-0.000123379	0.0126534	0.000772688	-1.53e-05	-2.04e-07	0.00186375	0.0135279	0.00333941	Alk	C3	NF	Allyl	North	0.800242	5.25971
CS76853	Faneronemi-3	GRC	37.07	22.04	0.000181842	4.78e-07	0.000174089	0.000803006	3.46e-07	0.000476884	2.67e-07	0.000142365	-2.82e-07	5.38e-08	5.8e-10	1.56e-07	0.000306671	0.000262329	-3.22e-06	0.0056577	0.00319783	0.000179446	0.000281575	1.17e-08	0.00168225	0.00850347	0.00184207	Alk	C4	F	OH-But	South	-0.972663	-0.731722
CS76854	IP-Fel-2	ESP	43.31	-5.7	-5.52e-06	4.78e-07	0.00119887	0.00387897	3.46e-07	-1.23e-05	2.67e-07	0.000563068	0.000110279	5.38e-08	5.8e-10	5.34e-05	3.89e-06	0.000428275	0.00036442	0.00253713	0.00324182	0.000280976	0.000473998	1.17e-08	0.00351778	0.0110599	9.86e-06	Alk	C4	F	OH-But	South	-3.37608	-0.975594
CS76856	Fell2-4	GER	48.43	8.79	0.00416276	4.78e-07	8.88e-06	-1.51e-05	3.46e-07	-1.23e-05	2.67e-07	-9.99e-07	-2.82e-07	5.38e-08	5.8e-10	1.56e-07	0.000664428	0.000147144	-3.22e-06	5.41e-05	0.00382786	1.5e-05	8.76e-07	1.17e-08	0.00437783	0.0135905	9.86e-06	OH	C3	NF	3OHP	North	1.9803	-1.16686
CS76857	Fell3-7	GER	48.43	8.79	0.00514566	4.78e-07	8.88e-06	-1.51e-05	3.46e-07	-1.23e-05	2.67e-07	-9.99e-07	-2.82e-07	5.38e-08	5.8e-10	1.56e-07	0.000914561	0.000175446	-3.22e-06	7.28e-05	0.00402853	0.000103579	8.76e-07	1.17e-08	0.00643814	0.0111429	9.86e-06	OH	C3	NF	3OHP	North	2.22305	-2.0165
CS76858	Filet-1	ITA	40.68	14.87	-0.000107343	9.31e-06	0.000172697	0.00657107	6.73e-06	-0.000240156	5.19e-06	-1.94e-05	0.000253392	1.05e-06	1.13e-08	3.03e-06	7.57e-05	0.000430295	9.09e-06	0.00142637	0.00375638	0.000366969	0.000248267	2.28e-07	0.00360686	0.0106117	0.000191759	Alk	C4	F	OH-But	South	-2.44613	-0.252602
CS76860	Fj??1-2	SWE	56.06	14.29	0.000639656	-8.35e-06	-0.000154943	0.000263744	-6.04e-06	0.000414268	-4.66e-06	1.74e-05	9.96e-05	-9.4e-07	-1.01e-08	8.34e-05	-6.79e-05	0.000599683	5.62e-05	-0.000123379	0.0115899	0.0004406	-1.53e-05	-2.04e-07	0.000689355	0.0128098	0.00284334	Alk	C3	NF	Allyl	North	-0.633065	3.94277
CS76862	Fj??2-4	SWE	56.06	14.29	0.00116956	4.78e-07	8.88e-06	-1.51e-05	3.46e-07	0.00177936	2.67e-07	-9.99e-07	-2.82e-07	5.38e-08	5.8e-10	1.56e-07	0.000184645	0.000541547	0.00036991	5.18e-05	0.00621416	0.000448332	8.76e-07	1.17e-08	0.00139307	0.00901843	0.00206867	Alk	C3	NF	Allyl	North	0.619845	1.91879
CS76863	Fly2-1	SWE	55.7509	13.3712	0.000169795	4.78e-07	0.00136347	-1.51e-05	0.000314906	-1.23e-05	2.77e-05	-9.99e-07	-2.82e-07	5.38e-08	5.8e-10	5.97e-05	6.12e-05	0.000518523	-3.22e-06	0.00555853	0.00517544	0.000471862	0.000401185	1.17e-08	0.00236523	0.00695564	9.86e-06	MSO	C4	NF	4MSO	North	-3.58207	-2.08273
CS76865	FlyA 3	SWE	55.7488	13.3742	0.000178249	-8.35e-06	0.000401157	0.000263744	7.3e-05	0.000215467	-4.66e-06	1.74e-05	4.93e-06	-9.4e-07	-1.01e-08	6.94e-05	-1.33e-05	0.000585416	5.62e-05	0.00174949	0.00493675	0.00025947	0.000323109	-2.04e-07	0.00112441	0.00800504	-0.000172045	Alk	C4	NF	Butenyl	North	-1.72672	-0.193559
CS76867	FOR-23	FRA	48.57	4.41	9.88e-05	4.78e-07	8.88e-06	0.00305861	3.46e-07	-1.23e-05	2.67e-07	8.48e-05	0.000125936	5.38e-08	5.8e-10	3.22e-05	7.95e-05	0.00029094	0.000118184	0.000917155	0.00183535	0.000149276	0.000269749	1.17e-08	0.00187915	0.00377202	9.86e-06	Alk	C4	F	OH-But	North	-1.33881	-1.32472
CS76868	Fri 1	SWE	55.8106	14.2091	0.00122719	4.78e-07	8.88e-06	-1.51e-05	3.46e-07	0.00367263	2.67e-07	-9.99e-07	-2.82e-07	5.38e-08	5.8e-10	1.56e-07	0.000545385	0.00027451	0.000396598	7.07e-06	0.00782881	0.000789041	0.000154179	1.17e-08	0.00174065	0.0099206	0.00170661	Alk	C3	NF	Allyl	North	0.995138	2.22136
CS76869	Fri 2	SWE	55.8106	14.2091	0.000636697	-8.35e-06	-0.000154943	0.000263744	-6.04e-06	0.00178	-4.66e-06	1.74e-05	9.4e-05	-9.4e-07	-1.01e-08	-2.72e-06	0.000142393	0.000518029	5.62e-05	-0.000123379	0.00993239	0.000913475	-1.53e-05	-2.04e-07	0.000603473	0.00726638	-0.000172045	Alk	C3	NF	Allyl	North	0.366677	2.32231
CS76870	Fri 3	SWE	55.8106	14.2091	0.00160596	4.78e-07	8.88e-06	-1.51e-05	3.46e-07	0.00454759	2.67e-07	-9.99e-07	3.51e-05	5.38e-08	5.8e-10	1.56e-07	0.000232643	0.000399959	0.000404174	7.07e-06	0.00648183	0.00072555	8.76e-07	1.17e-08	0.0029508	0.00854306	0.0019281	Alk	C3	NF	Allyl	North	1.3176	1.99607
CS76871	IP-Fue-2	ESP	38.26	-5.42	-5.52e-06	4.78e-07	0.000711028	0.00325971	3.46e-07	-1.23e-05	2.67e-07	0.000353042	3.64e-05	1.76e-05	5.8e-10	1.56e-07	3.89e-06	0.000398892	7.32e-05	0.000368213	0.00549167	0.000409416	0.000192911	1.17e-08	0.00290867	0.0145997	9.86e-06	Alk	C4	F	OH-But	South	-1.50723	0.53183
CS76873	Furni-1	ROU	45.14	25	0.00147414	4.78e-07	6.26e-05	9.05e-05	3.46e-07	0.00238703	2.67e-07	-9.99e-07	-2.82e-07	5.38e-08	5.8e-10	1.56e-07	0.000344233	0.000255519	-3.22e-06	7.07e-06	0.00449317	0.000334349	8.76e-07	1.17e-08	0.00313131	0.00788227	9.86e-06	Alk	C3	F	Allyl	South	1.35444	-0.321745
CS76875	Ge-0	SUI	46.5	6.08	0.000160449	4.78e-07	0.00196148	0.000225797	0.000247063	-1.23e-05	2.67e-07	-9.99e-07	3.82e-05	5.38e-08	5.8e-10	3.12e-05	3.89e-06	0.000570051	-3.22e-06	0.00346303	0.00503123	0.000363459	0.000416512	1.17e-08	0.00259654	0.00790131	9.86e-06	MSO	C4	F	4MSO	North	-3.09155	-1.67125
CS76876	Geg-14	ARM	40.1408	44.8203	0.00136262	9.31e-06	0.000172697	-0.000293964	6.73e-06	0.00444274	5.19e-06	7.16e-05	-5.5e-06	1.05e-06	1.13e-08	3.03e-06	0.000704323	0.00013255	-6.26e-05	0.000137516	0.00305901	0.00056866	1.7e-05	2.28e-07	0.00383745	0.00893164	0.000191759	Alk	C3	NF	Allyl	South	1.76929	-0.368928
CS76877	GEN-8	FRA	50.59	3.3	0.00157641	5.29e-05	8.88e-06	-1.51e-05	3.46e-07	0.0013719	2.67e-07	-9.99e-07	-2.82e-07	5.38e-08	5.8e-10	1.56e-07	0.000725688	0.00018355	-3.22e-06	5e-05	0.00414604	0.000118639	8.76e-07	1.17e-08	0.00414091	0.0114034	9.86e-06	Alk	C3	NF	Allyl	North	1.6152	-0.66613
CS76878	Giffo-1	ITA	38.44	16.13	-5.52e-06	4.78e-07	0.00141989	0.00474884	3.46e-07	-1.23e-05	2.67e-07	6.26e-05	5.47e-05	5.38e-08	1.62e-05	1.56e-07	3.89e-06	0.00033207	2.7e-05	0.0029041	0.00357974	0.000180693	8.93e-05	1.17e-08	0.00311754	0.011943	9.86e-06	Alk	C4	F	OH-But	South	-2.22504	-0.0573187
CS76879	IP-Glo-1	ESP	40.11	-5.77	0.000266139	4.78e-07	0.000592199	0.00541783	3.46e-07	-1.23e-05	2.67e-07	0.000255516	0.000446587	5.38e-08	5.8e-10	0.000269315	3.89e-06	0.00192767	-3.22e-06	0.000771366	0.0138671	0.000486118	8.76e-07	4.33e-06	0.00251753	0.0122459	9.86e-06	Alk	C4	F	OH-But	South	-7.19021	4.20293
CS76880	Gn-1	GER	48.57	9.17	0.00189261	0.000226878	8.88e-06	-1.51e-05	3.46e-07	0.00431542	2.67e-07	-9.99e-07	-2.82e-07	5.38e-08	5.8e-10	1.56e-07	0.00152266	0.000203497	-3.22e-06	7.07e-06	0.00374188	0.000301397	8.76e-07	1.17e-08	0.00399766	0.00980734	9.86e-06	Alk	C3	NF	Allyl	North	2.19551	-0.493568
CS76881	Gn2-3	GER	48.58	9.18	0.00131423	4.78e-07	5.13e-05	-1.51e-05	3.46e-07	0.00124678	2.67e-07	-9.99e-07	-2.82e-07	5.38e-08	5.8e-10	1.56e-07	0.000211929	0.000113358	-3.22e-06	7.07e-06	0.00242494	0.000291657	8.76e-07	1.17e-08	0.00267754	0.00840179	9.86e-06	Alk	C3	NF	Allyl	North	1.42832	-0.781417
CS76882	Goced-1	BUL	41.57	23.85	9.58e-05	4.78e-07	0.000516651	0.00393031	3.46e-07	-1.23e-05	2.67e-07	0.000171221	-2.82e-07	5.38e-08	5.8e-10	1.56e-05	3.89e-06	0.000337745	3.41e-05	0.00149813	0.00296929	0.000349844	0.000154185	1.17e-08	0.00230925	0.00671201	9.86e-06	Alk	C4	F	OH-But	South	-1.33126	-0.977254
CS76883	Gol-2	UK	57.9672	-3.96722	-0.000107343	9.31e-06	0.000172697	0.00289965	6.73e-06	-0.000240156	5.19e-06	-1.94e-05	0.000603321	1.05e-06	1.13e-08	0.000185958	7.57e-05	0.000611431	4.02e-05	0.000517823	0.00559663	0.000390792	9.48e-05	2.28e-07	0.00145903	0.00902597	0.000191759	Alk	C4	F	OH-But	North	-4.08213	1.59681
CS76884	Got-22	GER	51.5338	9.9355	0.000475446	4.78e-07	8.88e-06	-1.51e-05	3.46e-07	0.0011107	2.67e-07	-9.99e-07	5.12e-05	5.38e-08	5.8e-10	1.56e-07	7.44e-05	0.000277914	-3.22e-06	3.25e-05	0.00526687	0.000374379	8.76e-07	1.17e-08	0.00101081	0.00872505	0.00126154	Alk	C3	NF	Allyl	North	0.707332	1.02706
CS76885	Gr-5	AUT	47	15.5	0.0026909	4.78e-07	8.88e-06	-1.51e-05	3.46e-07	-1.23e-05	2.67e-07	-9.99e-07	-2.82e-07	5.38e-08	5.8e-10	1.56e-07	0.00105829	0.000149275	-3.22e-06	0.000556889	0.00429498	0.000163335	8.76e-07	1.17e-08	0.00361496	0.0102649	9.86e-06	OH	C3	NF	3OHP	South	1.55255	-1.07969
CS76886	IP-Gra-0	ESP	36.77	-5.39	0.000175402	4.78e-07	0.00099352	0.00153139	0.00035511	0.00047058	2.67e-07	0.00353564	0.000148814	5.38e-08	5.8e-10	1.56e-07	3.89e-06	0.000418976	-3.22e-06	0.00244558	0.00657244	0.000503758	8.76e-07	1.17e-08	0.00162853	0.00977195	9.86e-06	Alk	C4	F	OH-But	South	-2.4943	0.30588
CS76887	Gradi-1	CRO	45.17	18.7	0.00221867	3.42e-06	0.000109175	7e-05	2.47e-06	0.00263191	1.91e-06	-7.14e-06	-2.02e-06	3.85e-07	4.15e-09	1.11e-06	0.000182923	0.000209091	-2.3e-05	5.06e-05	0.00317857	0.000261998	6.27e-06	8.37e-08	0.00363446	0.0115995	7.05e-05	Alk	C3	F	Allyl	South	1.63173	-0.405856
CS76888	Grivo-1	BUL	41.84	25.75	0.000495257	4.78e-07	0.000365768	0.00165842	3.46e-07	0.000804933	2.67e-07	0.00100442	0.000230134	5.38e-08	5.8e-10	6.03e-05	6.23e-05	0.000594585	-3.22e-06	0.00159543	0.0084104	4.49e-05	8.76e-07	1.17e-08	0.000977635	0.0163452	0.00247861	Alk	C4	F	OH-But	South	-1.79612	2.95026
CS76890	Groch-1	BUL	41.71	24.41	0.000464541	-8.35e-06	0.000709356	0.00240817	-6.04e-06	0.00157446	-4.66e-06	0.000195326	4.93e-06	-9.4e-07	-1.01e-08	-2.72e-06	0.00148367	0.000186796	5.62e-05	0.000854774	0.00372121	0.000240229	-1.53e-05	-2.04e-07	0.00349024	0.0097841	-0.000172045	Alk	C4	F	OH-But	South	0.451053	-0.822314
CS76891	Gr??n 12	SWE	62.806	18.1896	0.00103499	-8.35e-06	-0.000154943	0.000263744	-6.04e-06	0.00105185	-4.66e-06	1.74e-05	9.47e-05	-9.4e-07	-1.01e-08	-2.72e-06	9.91e-06	0.000584558	5.62e-05	-0.000123379	0.0106137	0.000614079	-1.53e-05	-2.04e-07	0.00238553	0.0127568	0.00363164	Alk	C3	NF	Allyl	North	0.44999	3.66971
CS76894	IP-Gua-1	ESP	39.4	-5.33	0.000451726	3.42e-06	0.000693002	0.00233748	2.47e-06	0.000486673	1.91e-06	0.000983469	0.000177676	1.41e-05	4.15e-09	2.51e-05	0.000127413	0.000577942	0.000353874	0.000781058	0.00744233	0.00034202	0.0002047	8.37e-08	0.00268372	0.0126789	0.00219229	Alk	C4	F	OH-But	South	-2.30139	1.87759
CS76896	Gul1-2	SWE	56.4606	15.8127	0.0009963	4.78e-07	8.88e-06	-1.51e-05	0.000283169	0.00083311	2.67e-07	-9.99e-07	-2.82e-07	5.38e-08	5.8e-10	1.56e-07	4.65e-05	0.000273468	0.00039259	7.07e-06	0.00576026	0.000183264	8.76e-07	1.17e-08	0.00129259	0.0110628	9.86e-06	Alk	C3	NF	Allyl	North	0.743444	0.566811
CS76897	H55	CZE	49	15	0.000510156	4.78e-07	0.00212559	-1.51e-05	0.00109966	-1.23e-05	0.000138789	-9.99e-07	-2.82e-07	5.38e-08	5.8e-10	0.0001408	3.89e-06	0.000829179	-3.22e-06	0.00736651	0.00438039	0.00061568	0.000721988	1.17e-08	0.00306852	0.00646634	9.86e-06	MSO	C4	NF	4MSO	North	-8.64957	-4.98939
CS76898	Ha-HBT1-2	GER	48.54	9.02	0.00201701	0.000130383	8.88e-06	-1.51e-05	3.46e-07	0.00202137	2.67e-07	-9.99e-07	-2.82e-07	5.38e-08	5.8e-10	1.56e-07	0.00170229	0.000163997	-3.22e-06	7.07e-06	0.0028987	0.000337722	8.76e-07	1.17e-08	0.00449694	0.0107802	9.86e-06	Alk	C3	NF	Allyl	North	2.0024	-0.95812
CS76899	Ha-HBT2-10	GER	48.54	9.02	0.00120759	4.78e-07	8.88e-06	-1.51e-05	3.46e-07	0.000315857	2.67e-07	-9.99e-07	1.89e-05	5.38e-08	5.8e-10	1.56e-07	8.77e-05	0.000157617	-3.22e-06	4.41e-05	0.00465191	0.000236012	8.76e-07	1.17e-08	0.00315803	0.0113812	9.86e-06	OH	C3	NF	3OHP	North	1.19792	-0.219386
CS76900	Ha-HBT3-11	GER	48.54	9.02	0.00122194	4.78e-07	8.88e-06	-1.51e-05	3.46e-07	0.00121062	2.67e-07	-9.99e-07	0.000110168	5.38e-08	5.8e-10	3.71e-05	0.000501611	0.000215846	-3.22e-06	0.000430734	0.00500035	9.44e-05	8.76e-07	1.17e-08	0.00187553	0.0107489	0.0015364	Alk	C3	NF	Allyl	North	0.625463	0.725519
CS76901	Ha-P-13	GER	48.54	9.01	0.00182702	4.78e-05	8.88e-06	-1.51e-05	3.46e-07	0.0015423	2.67e-07	-9.99e-07	2.43e-05	5.38e-08	5.8e-10	1.56e-07	0.00105474	0.000206908	-3.22e-06	0.000605412	0.00364692	0.000225227	8.76e-07	1.17e-08	0.00388267	0.0085647	9.86e-06	Alk	C3	NF	Allyl	North	1.48532	-1.00947
CS76902	Ha-P2-1	GER	48.54	9.01	0.00250405	0.00022985	5.51e-05	-1.51e-05	3.46e-07	0.00245917	2.67e-07	-9.99e-07	2.77e-05	5.38e-08	5.8e-10	1.56e-07	0.00149095	0.000191972	-3.22e-06	0.000614498	0.0032725	0.000217971	8.76e-07	1.17e-08	0.00397685	0.00980167	9.86e-06	Alk	C3	NF	Allyl	North	1.87904	-1.05871
CS76903	Ha-S-B	GER	48.54	9.01	0.00153244	0.000173783	8.88e-06	-1.51e-05	3.46e-07	0.00139755	2.67e-07	-9.99e-07	2.87e-05	5.38e-08	5.8e-10	1.56e-07	0.000650001	0.00027337	-3.22e-06	7.07e-06	0.00536668	0.000329027	8.76e-07	1.17e-08	0.00358424	0.00986393	9.86e-06	Alk	C3	NF	Allyl	North	1.32083	-0.205899
CS76904	Ha-SP-2	GER	48.54	9.01	0.00921934	4.81e-05	8.88e-06	-1.51e-05	3.46e-07	-1.23e-05	2.67e-07	-9.99e-07	-2.82e-07	5.38e-08	5.8e-10	1.56e-07	0.00126832	0.000149211	-3.22e-06	0.000745136	0.00251345	0.000240781	8.76e-07	1.17e-08	0.00477176	0.0084743	9.86e-06	OH	C3	NF	3OHP	North	2.82115	-2.80583
CS76905	Hadd-2	SWE	57.3263	15.8979	0.00283545	8.98e-05	8.88e-06	-1.51e-05	3.46e-07	-1.23e-05	2.67e-07	-9.99e-07	-2.82e-07	5.38e-08	5.8e-10	1.56e-07	0.00287438	0.000110285	-3.22e-06	6.5e-05	0.00204781	0.00015362	8.76e-07	1.17e-08	0.00480782	0.0108409	9.86e-06	MSO	C3	NF	3MSO	North	2.13387	-1.94149
CS76906	Hadd-3	SWE	57.3263	15.8979	0.00252218	4.78e-07	8.88e-06	-1.51e-05	3.46e-07	-1.23e-05	2.67e-07	-9.99e-07	-2.82e-07	5.38e-08	5.8e-10	1.56e-07	0.00010784	2.42e-05	-3.22e-06	4.23e-05	0.00114861	0.000299386	8.76e-07	1.17e-08	0.00341504	0.00538519	9.86e-06	OH	C3	NF	3OHP	North	1.63687	-1.96289
CS76907	Hag-2	SWE	56.5804	16.4063	0.000959195	-8.35e-06	-0.000154943	0.000263744	-6.04e-06	0.000771884	-4.66e-06	1.74e-05	0.000119771	-9.4e-07	1.21e-05	-2.72e-06	2.17e-05	0.000518308	5.62e-05	-9.61e-05	0.01279	1.06e-05	-1.53e-05	-2.04e-07	0.00101007	0.0140188	0.00303111	Alk	C3	NF	Allyl	North	0.203988	4.34232
CS76909	Halca-1	SVK	48.47	18.96	0.00298911	4.78e-07	8.88e-06	-1.51e-05	3.46e-07	0.00400762	2.67e-07	-9.99e-07	-2.82e-07	5.38e-08	5.8e-10	1.56e-07	0.00035932	0.000188261	0.000643181	7.07e-06	0.00352606	0.000475599	6.61e-05	1.17e-08	0.0035038	0.00778498	9.86e-06	Alk	C3	NF	Allyl	South	1.8714	-0.103171
CS76910	Hamm-1	SWE	55.4234	13.9905	0.000488234	-8.35e-06	-0.000154943	0.000263744	-6.04e-06	0.000491298	-4.66e-06	1.74e-05	4.93e-06	-9.4e-07	-1.01e-08	-2.72e-06	-2.57e-05	0.000297061	5.62e-05	-9.07e-05	0.00800451	1.06e-05	-1.53e-05	-2.04e-07	0.00108257	0.0112489	0.00303233	Alk	C3	NF	Allyl	North	0.933267	2.15776
CS76913	Hart-2	GER	48.39	8.85	0.00155807	4.76e-05	8.88e-06	-1.51e-05	3.46e-07	0.00116156	2.67e-07	-9.99e-07	-2.82e-07	5.38e-08	5.8e-10	1.56e-07	0.000555495	0.000150445	-3.22e-06	7.07e-06	0.00402256	9.56e-05	8.76e-07	1.17e-08	0.00297059	0.00922217	9.86e-06	Alk	C3	NF	Allyl	North	1.50581	-0.730664
CS76914	Haes-1	GER	48.6	9.2	0.00220519	0.000183228	0.000105789	-1.51e-05	3.46e-07	0.0019937	2.67e-07	-9.99e-07	-2.82e-07	5.38e-08	5.8e-10	1.56e-07	0.00103399	0.000182482	-3.22e-06	7.07e-06	0.00380576	1.85e-05	8.76e-07	1.17e-08	0.0033744	0.00896097	9.86e-06	Alk	C3	NF	Allyl	North	1.77357	-1.06878
CS76915	Hau-0	DEN	55.675	12.5686	0.00108951	4.78e-07	8.88e-06	2.37e-05	3.46e-07	0.00249466	2.67e-07	7.39e-05	0.000114365	5.38e-08	5.8e-10	1.35e-05	8.33e-05	0.000676073	3.06e-05	7.07e-06	0.0205582	0.000592259	8.76e-07	1.17e-08	0.00152714	0.0104551	0.00117631	Alk	C3	F	Allyl	North	-0.234219	4.47787
CS76916	HE-1	GER	48.55	8.99	0.00319094	4.78e-07	8.88e-06	-1.51e-05	3.46e-07	-1.23e-05	2.67e-07	-9.99e-07	-2.82e-07	5.38e-08	5.8e-10	1.56e-07	0.000255996	0.00010004	-3.22e-06	8.67e-05	0.00214922	0.000126712	8.76e-07	1.17e-08	0.00515513	0.0101148	9.86e-06	OH	C3	NF	3OHP	North	1.84149	-1.83644
CS76917	IP-Hec-0	ESP	42.86	-0.7	0.000225318	4.78e-07	0.000335937	0.00312458	3.46e-07	0.000155302	2.67e-07	0.000181706	0.000176644	5.38e-08	5.8e-10	1.56e-07	3.89e-06	0.000263455	4.02e-05	0.000638969	0.00443785	0.000258203	8.76e-07	1.17e-08	0.00244745	0.0130901	9.86e-06	Alk	C4	F	OH-But	South	-0.574607	0.455539
CS76918	Hel-3	SWE	57.8765	14.8549	0.000805081	4.78e-07	8.88e-06	-1.51e-05	3.46e-07	0.00128092	2.67e-07	-9.99e-07	-2.82e-07	5.38e-08	5.8e-10	1.56e-07	0.000288026	0.000284843	-3.22e-06	7.07e-06	0.00764439	0.000246266	8.76e-07	1.17e-08	0.00103462	0.0105053	9.86e-06	Alk	C3	NF	Allyl	North	0.911865	0.971569
CS76920	IP-Her-12	ESP	39.4	-5.78	0.00017768	4.78e-07	0.0002098	0.000745969	3.46e-07	0.00157694	2.67e-07	0.00078379	2.63e-05	5.38e-08	5.8e-10	2.6e-05	3.89e-06	0.000276581	-3.22e-06	0.000752667	0.0105806	0.000292821	0.000178716	1.17e-08	0.000752112	0.00836469	0.00150996	Alk	C4	F	OH-But	South	-0.636995	1.71851
CS76924	Hod	CZE	48.8	17.1	0.00141098	4.78e-07	8.88e-06	-1.51e-05	3.46e-07	0.00174896	2.67e-07	-9.99e-07	-2.82e-07	5.38e-08	5.8e-10	1.56e-07	0.000392956	0.000140668	-3.22e-06	2.47e-05	0.00337832	0.000169505	8.76e-07	1.17e-08	0.00273648	0.00914587	0.000609091	Alk	C3	NF	Allyl	North	1.53535	-0.377536
CS76925	Hof-1	GER	48.41	8.85	0.00208005	0.000151291	8.12e-05	-1.51e-05	3.46e-07	0.001517	2.67e-07	-9.99e-07	-2.82e-07	5.38e-08	5.8e-10	1.56e-07	0.00125068	0.000203586	-3.22e-06	0.000318078	0.00361908	0.000224017	8.76e-07	1.17e-08	0.00337148	0.00762324	9.86e-06	Alk	C3	NF	Allyl	North	1.59355	-1.13754
CS76926	HolA-1 1	SWE	55.7491	13.399	0.00153224	4.78e-07	8.88e-06	-1.51e-05	3.46e-07	0.0047664	2.67e-07	4.47e-05	5.67e-05	5.38e-08	5.8e-10	1.56e-07	4.19e-05	0.000355109	0.000537965	7.07e-06	0.00430241	0.00026493	8.76e-07	1.17e-08	0.00140976	0.0076233	9.86e-06	Alk	C3	NF	Allyl	North	1.29162	0.903276
CS76927	HolA-1 2	SWE	55.7491	13.399	0.000384502	-8.35e-06	-0.000154943	0.000263744	-6.04e-06	0.00228794	-4.66e-06	1.74e-05	4.93e-06	-9.4e-07	-1.01e-08	-2.72e-06	0.000790161	0.000121499	5.62e-05	-0.000123379	0.00278255	0.000164359	-1.53e-05	-2.04e-07	0.000967599	0.0070907	0.00170185	Alk	C3	NF	Allyl	North	1.60018	0.459318
CS76928	HolA-2 2	SWE	55.7491	13.399	0.000651475	4.78e-07	8.88e-06	-1.51e-05	3.46e-07	0.00248474	2.67e-07	-9.99e-07	6.25e-05	5.38e-08	5.8e-10	1.56e-07	0.00110119	0.000235886	-3.22e-06	7.07e-06	0.00537971	0.000161691	8.76e-07	1.17e-08	0.00133135	0.00979125	9.86e-06	Alk	C3	NF	Allyl	North	1.18047	0.462127
CS76930	IP-Hor-0	ESP	41.67	2.62	0.00121886	4.78e-07	8.88e-06	4.17e-05	3.46e-07	0.00169098	2.67e-07	-9.99e-07	0.000111883	5.38e-08	5.8e-10	1.56e-07	3e-05	0.000272598	-3.22e-06	7.07e-06	0.00661361	7.53e-05	8.76e-07	1.17e-08	0.00139796	0.0138877	0.00120431	Alk	C3	F	Allyl	South	0.897853	1.55691
CS76931	Hov1-10	SWE	56.1	13.74	0.000304681	4.78e-07	0.000171265	-1.51e-05	0.000334997	-1.23e-05	2.67e-07	-9.99e-07	8.18e-05	5.38e-08	5.8e-10	3.74e-05	9.54e-05	0.000555961	-3.22e-06	0.00699	0.0062598	0.000225912	0.000408954	1.17e-08	0.00124291	0.0105792	0.00201551	MSO	C4	NF	4MSO	North	-2.58443	0.030456
CS76932	Hov1-7	SWE	56.1	13.74	0.00123431	4.78e-07	8.88e-06	5.73e-05	3.46e-07	0.00154132	2.67e-07	-9.99e-07	-2.82e-07	5.38e-08	5.8e-10	1.56e-07	0.000161575	0.000309918	-3.22e-06	7.07e-06	0.00907199	0.000254502	8.76e-07	1.17e-08	0.00201111	0.0143103	9.86e-06	Alk	C3	F	Allyl	North	1.04887	1.48186
CS76936	Hov4-1	SWE	56.1	13.74	0.000312628	-8.35e-06	-0.000154943	0.000320158	-6.04e-06	0.000648474	-4.66e-06	1.74e-05	4.93e-06	-9.4e-07	-1.01e-08	-2.72e-06	-6.79e-05	0.000140045	5.62e-05	-8.79e-05	0.00354874	0.000347353	-1.53e-05	-2.04e-07	0.00110653	0.0129682	0.00256174	Alk	C3	F	Allyl	North	1.25632	1.70214
CS76937	Hovdala-2	SWE	56.1	13.74	0.000556346	4.78e-07	0.00105861	-1.51e-05	0.000152366	-1.23e-05	2.67e-07	-9.99e-07	-2.82e-07	5.38e-08	5.8e-10	1.56e-07	6.37e-05	0.000210382	-3.22e-06	0.00310229	0.00369715	0.000308556	8.76e-07	1.17e-08	0.00323116	0.0101376	9.86e-06	MSO	C4	NF	4MSO	North	-0.267671	-1.33497
CS76938	Hovdala-6	SWE	56.1	13.74	0.000389464	4.78e-07	8.88e-06	-1.51e-05	3.46e-07	0.000521401	2.67e-07	-9.99e-07	-2.82e-07	5.38e-08	5.8e-10	1.56e-07	4.42e-05	0.000246418	-3.22e-06	7.07e-06	0.00704813	0.000608091	8.76e-07	1.17e-08	0.000805557	0.0114827	9.86e-06	Alk	C3	NF	Allyl	North	0.728219	1.36459
CS76940	HR-10	UK	51.4083	-0.6383	0.000142923	4.78e-07	0.00139966	0.00439013	3.46e-07	-1.23e-05	2.67e-07	8.28e-05	0.000251642	5.38e-08	5.8e-10	4.63e-05	3.89e-06	0.000433188	0.000172215	0.00113178	0.00371662	0.000185455	0.000263519	1.17e-08	0.0017497	0.00818356	9.86e-06	Alk	C4	F	OH-But	North	-3.17448	-0.582503
CS76941	HSm	CZE	49.33	15.76	0.00339963	4.78e-07	8.88e-06	-1.51e-05	3.46e-07	-1.23e-05	2.67e-07	-9.99e-07	-2.82e-07	5.38e-08	5.8e-10	1.56e-07	0.000171052	0.000247846	-3.22e-06	0.000454551	0.0036713	0.000239275	8.76e-07	1.17e-08	0.0045503	0.00909178	9.86e-06	OH	C3	NF	3OHP	North	1.46995	-1.37288
CS76942	IP-Hue-3	ESP	42.96	-6.1	0.000304048	-8.35e-06	-0.000154943	0.000263744	-6.04e-06	0.000313215	-4.66e-06	1.74e-05	4.93e-06	-9.4e-07	1.7e-05	6.08e-05	-6.79e-05	0.000525224	5.62e-05	-0.000123379	0.0144006	0.000650564	-1.53e-05	-2.04e-07	0.000518265	0.0167404	0.00249823	Alk	C3	NF	Allyl	South	-0.469747	5.82019
CS76943	IP-Hum-2	ESP	42.23	-3.69	0.000462051	4.78e-07	8.88e-06	-1.51e-05	3.46e-07	0.00120874	2.67e-07	-9.99e-07	-2.82e-07	5.38e-08	5.8e-10	1.56e-07	7.14e-05	0.000537443	0.000192896	7.07e-06	0.0127586	0.000932225	8.76e-07	1.17e-08	0.000700533	0.00958794	0.000985523	Alk	C3	NF	Allyl	South	0.160194	3.26841
CS76944	Iasi-1	ROU	47.16	27.59	0.00202145	7.52e-05	8.88e-06	-1.51e-05	3.46e-07	0.00696663	2.67e-07	9.83e-05	5.07e-05	5.38e-08	5.8e-10	1.56e-07	0.000421374	0.000276567	2.36e-05	6.79e-05	0.00542973	0.000366188	8.76e-07	1.17e-08	0.0026962	0.0100886	9.86e-06	Alk	C3	NF	Allyl	South	2.01294	0.899601
CS76945	IP-Ini-0	ESP	40.46	-3.75	0.0013334	4.78e-07	8.88e-06	2.19e-05	3.46e-07	0.00132024	2.67e-07	-9.99e-07	5.1e-05	5.38e-08	5.8e-10	1.56e-07	0.000243419	0.000287493	-3.22e-06	7.07e-06	0.00658729	0.000463841	8.76e-07	1.17e-08	0.00333871	0.013199	9.86e-06	Alk	C3	F	Allyl	South	1.07964	0.792749
CS76947	ISS-20	FRA	43.92	3.71	-5.52e-06	4.78e-07	0.000926222	0.00486333	3.46e-07	-1.23e-05	2.67e-07	0.000597194	0.000127607	5.38e-08	5.8e-10	2.17e-05	3.89e-06	0.00035288	6.48e-05	0.0038607	0.00296875	0.000337677	0.000323181	1.17e-08	0.00278575	0.00868689	9.86e-06	Alk	C4	F	OH-But	North	-2.9872	-1.25981
CS76948	IST-29	FRA	47.58	5.33	-5.52e-06	4.78e-07	0.000601135	0.00253435	3.46e-07	-1.23e-05	2.67e-07	-9.99e-07	0.000160267	5.38e-08	5.8e-10	0.000124856	3.89e-06	0.000948676	-3.22e-06	0.00232008	0.00538753	0.000193741	0.000165896	1.17e-08	0.00184754	0.00837018	9.86e-06	Alk	C4	F	OH-But	North	-3.53579	0.382063
CS76950	Istisu-5	AZE	38.9786	48.5594	0.00515223	-8.35e-06	4.12e-05	0.000263744	-6.04e-06	0.000215467	-4.66e-06	1.74e-05	4.93e-06	-9.4e-07	-1.01e-08	-2.72e-06	0.0020554	8.83e-05	5.62e-05	4.7e-05	0.00121044	0.000453458	-1.53e-05	2.69e-05	0.00540124	0.00659242	-0.000172045	OH	C3	NF	3OHP	North	2.16378	-3.48382
CS76953	Istisu-9	AZE	38.9786	48.5594	0.00838325	-8.35e-06	-1.5e-05	0.000263744	-6.04e-06	0.000215467	-4.66e-06	1.74e-05	4.93e-06	-9.4e-07	-1.01e-08	-2.72e-06	0.00349217	0.000136025	5.62e-05	0.000115509	0.00242406	0.000374844	-1.53e-05	-2.04e-07	0.00825427	0.00840653	-0.000172045	OH	C3	NF	3OHP	North	3.42699	-3.51606
CS76954	Ivano-1	BUL	43.7	25.91	0.000653263	-8.35e-06	-0.000154943	0.000263744	-6.04e-06	0.00146576	-4.66e-06	1.74e-05	4.93e-06	-9.4e-07	-1.01e-08	5.43e-05	0.000269061	0.000812657	5.62e-05	-0.000123379	0.0114582	2.96e-05	-1.53e-05	-2.04e-07	0.00109301	0.0123765	-0.000172045	Alk	C3	NF	Allyl	South	-0.2398	2.42905
CS76956	Jl-2	CZE	49.17	16.5	0.00590341	4.78e-07	8.88e-06	-1.51e-05	3.46e-07	-1.23e-05	2.67e-07	-9.99e-07	-2.82e-07	5.38e-08	5.8e-10	1.56e-07	0.00069032	0.000176819	-3.22e-06	0.000117314	0.00367697	0.000128631	8.76e-07	1.17e-08	0.00454728	0.0124263	9.86e-06	OH	C3	NF	3OHP	North	2.22223	-1.49888
CS76959	Kal 1	SWE	56.047	13.9519	0.000871688	-8.35e-06	-0.000154943	0.000263744	-6.04e-06	0.000649494	-4.66e-06	1.74e-05	8.09e-05	-9.4e-07	-1.01e-08	-2.72e-06	0.000210666	0.000219636	5.62e-05	-0.000123379	0.00642197	0.000460194	-1.53e-05	-2.04e-07	0.000973085	0.0126608	-0.000172045	Alk	C3	NF	Allyl	North	1.00612	1.38489
CS76962	Kardz-1	BUL	41.62	25.35	0.000247918	4.78e-07	0.000176506	0.00168369	3.46e-07	0.000664448	2.67e-07	0.000838176	6.87e-05	5.38e-08	5.8e-10	1.56e-07	3.89e-06	0.000270101	8.51e-05	0.00086606	0.00358933	0.000358739	8.76e-07	1.17e-08	0.00157401	0.00883063	9.86e-06	Alk	C4	F	OH-But	South	-0.206934	0.10386
CS76963	Kardz-2	BUL	41.66	25.47	0.000271222	4.78e-07	0.000247675	0.000874153	3.46e-07	0.000383015	2.67e-07	0.000184167	0.000206198	5.38e-08	5.8e-10	1.56e-07	3.89e-06	0.000260627	-3.22e-06	0.000744628	0.00520513	0.000394707	8.76e-07	1.17e-08	0.000856512	0.0136764	0.00151469	Alk	C4	F	OH-But	South	-0.202284	1.75288
CS76964	K??vlinge-1	SWE	55.8	13.1	0.00058599	4.78e-07	8.88e-06	-1.51e-05	3.46e-07	0.000492764	2.67e-07	-9.99e-07	-2.82e-07	5.38e-08	5.8e-10	1.56e-07	8.12e-05	0.000309923	0.00040544	5.19e-05	0.00693752	0.000573095	8.76e-07	1.17e-08	0.00121426	0.00676339	0.000699125	Alk	C3	NF	Allyl	North	0.585898	1.15432
CS76965	KBG1-14	GER	48.53	9.01	0.00237214	0.000184797	8e-05	-1.51e-05	3.46e-07	0.00190805	2.67e-07	-9.99e-07	-2.82e-07	5.38e-08	5.8e-10	1.56e-07	0.00149848	0.000241296	-3.22e-06	0.000453306	0.00411891	0.000104618	8.76e-07	1.17e-08	0.00400866	0.00942335	9.86e-06	Alk	C3	NF	Allyl	North	1.74219	-1.10908
CS76966	KBG2-13	GER	48.53	9.01	0.00571024	4.78e-07	8.88e-06	-1.51e-05	3.46e-07	-1.23e-05	2.67e-07	-9.99e-07	-2.82e-07	5.38e-08	5.8e-10	1.56e-07	0.000365272	0.000153825	-3.22e-06	0.00010678	0.00240526	0.000194631	8.76e-07	1.17e-08	0.00505448	0.0110181	9.86e-06	OH	C3	NF	3OHP	North	2.21551	-1.90506
CS76967	Kent	UK	51.15	0.4	0.00465004	4.78e-07	8.88e-06	-1.51e-05	5.46e-05	-1.23e-05	2.67e-07	-9.99e-07	-2.82e-07	5.38e-08	5.8e-10	1.56e-07	0.00120455	0.00024185	-3.22e-06	0.000116179	0.00378814	0.00013483	8.76e-07	1.17e-08	0.00439418	0.00955502	9.86e-06	OH	C3	NF	3OHP	North	1.86768	-1.67766
CS76968	Kia 1	SWE	56.0573	14.302	0.000567664	-8.35e-06	-0.000154943	0.000263744	-6.04e-06	0.000680245	-4.66e-06	1.74e-05	4.93e-06	-9.4e-07	1.37e-05	-2.72e-06	3.72e-05	0.000344404	5.62e-05	-8.79e-05	0.00715618	0.000662685	-1.53e-05	-2.04e-07	0.000557857	0.0133493	0.00252142	Alk	C3	NF	Allyl	North	0.653462	3.71966
CS76969	Kn-0	LTU	54.8969	23.8924	0.00227788	4.78e-07	8.88e-06	-1.51e-05	3.46e-07	-1.23e-05	2.67e-07	-9.99e-07	-2.82e-07	5.38e-08	5.8e-10	1.56e-07	0.000120256	0.000197589	-3.22e-06	8e-05	0.00345898	0.000188903	8.76e-07	1.17e-08	0.00350154	0.00800521	9.86e-06	OH	C3	NF	3OHP	North	1.32117	-1.1766
CS76970	Kni-1	SWE	55.66	13.4	0.00015498	4.78e-07	0.00115755	-1.51e-05	0.000577096	-1.23e-05	6.42e-05	-9.99e-07	-2.82e-07	5.38e-08	5.8e-10	0.000166649	8.91e-05	0.000931913	-3.22e-06	0.00524511	0.00840302	0.000542672	0.000426393	1.17e-08	0.00167657	0.00632906	9.86e-06	MSO	C4	NF	4MSO	North	-5.99594	-1.43786
CS76971	Knjas-1	SRB	43.54	22.29	0.00131813	4.78e-07	8.88e-06	2.04e-05	3.46e-07	0.00264912	2.67e-07	-9.99e-07	-2.82e-07	5.38e-08	5.8e-10	1.56e-07	0.000205456	0.000144117	-3.22e-06	8.53e-05	0.0041426	0.000146502	8.76e-07	1.17e-08	0.00240642	0.0143323	9.86e-06	Alk	C3	F	Allyl	South	1.65188	0.422636
CS76974	Kolar-1	BUL	41.37	23.14	0.00036775	4.78e-07	0.00113007	0.000899742	3.46e-07	0.00089049	2.67e-07	0.00080105	-2.82e-07	5.38e-08	5.8e-10	3.31e-05	3.89e-06	0.00040972	0.000160219	0.00126197	0.00345789	0.000364722	0.000186473	1.17e-08	0.000846793	0.00687261	0.000751778	Alk	C4	F	OH-But	South	-1.5192	-0.220939
CS76976	PHW-3	GER	51	7	0.0030556	4.78e-07	8.88e-06	-1.51e-05	3.46e-07	-1.23e-05	2.67e-07	-9.99e-07	-2.82e-07	5.38e-08	5.8e-10	1.56e-07	0.00017719	0.000105211	-3.22e-06	8.75e-05	0.00260925	0.000509913	8.76e-07	1.17e-08	0.00244935	0.00941664	9.86e-06	OH	C3	NF	3OHP	North	1.55188	-0.761053
CS76981	Kor 3	SWE	57.2746	16.1494	0.00164352	4.78e-07	8.88e-06	7.06e-05	3.46e-07	0.00193035	2.67e-07	-9.99e-07	-2.82e-07	5.38e-08	5.8e-10	1.21e-05	8.3e-05	0.00052774	-3.22e-06	7.07e-06	0.0088459	0.000233339	8.76e-07	1.17e-08	0.00118983	0.0103442	0.00160913	Alk	C3	F	Allyl	North	0.610842	1.91485
CS76982	Kor 4	SWE	57.2746	16.1494	0.00111926	4.78e-07	8.88e-06	4.47e-05	3.46e-07	0.0013767	2.67e-07	-9.99e-07	-2.82e-07	5.38e-08	5.8e-10	1.56e-07	0.000222597	0.000313918	-3.22e-06	7.07e-06	0.00514371	0.000337799	8.76e-07	1.17e-08	0.00360466	0.012929	9.86e-06	Alk	C3	F	Allyl	North	1.17925	0.326667
CS76983	Koren-1	BUL	41.83	25.69	0.000549862	4.78e-07	0.000315694	0.00136855	3.46e-07	0.00124917	2.67e-07	0.000992113	2.98e-05	5.38e-08	5.8e-10	1.97e-05	3.89e-06	0.000334952	0.000125408	0.00199402	0.00578376	6.18e-05	8.76e-07	1.17e-08	0.00102842	0.0065928	0.00108795	Alk	C4	F	OH-But	South	-0.590063	0.321986
CS76984	Krazo-1	RUS	53.06	51.96	0.000543757	-8.35e-06	-0.000154943	0.000263744	-6.04e-06	0.00193489	-4.66e-06	1.74e-05	4.93e-06	-9.4e-07	-1.01e-08	-2.72e-06	-1.23e-05	0.000165405	5.62e-05	-0.000123379	0.00555923	0.000537193	-1.53e-05	-2.04e-07	0.000834233	0.0093896	-0.000172045	Alk	C3	NF	Allyl	North	1.31132	1.03443
CS76990	Kus2-2	GER	48.52	9.11	0.00407998	7.76e-05	8.88e-06	-1.51e-05	3.46e-07	-1.23e-05	2.67e-07	-9.99e-07	-2.82e-07	5.38e-08	5.8e-10	1.56e-07	0.0014486	0.000129207	3.05e-05	0.000556529	0.00291733	4.72e-05	8.76e-07	1.17e-08	0.00587274	0.0111289	9.86e-06	OH	C3	NF	3OHP	North	2.12008	-2.14124
CS76991	Kus3-1	GER	48.51	9.11	0.00439688	4.78e-07	8.88e-06	-1.51e-05	3.46e-07	-1.23e-05	2.67e-07	-9.99e-07	-2.82e-07	5.38e-08	5.8e-10	1.56e-07	0.000219434	0.000131576	-3.22e-06	0.000582814	0.00307696	0.000335088	8.76e-07	1.17e-08	0.00481424	0.0104388	9.86e-06	OH	C3	NF	3OHP	North	1.86342	-1.5426
CS76996	IP-Lac-0	ESP	43.33	-5.91	0.000195154	4.78e-07	0.00248874	0.00146482	3.46e-07	-1.23e-05	2.67e-07	0.00158791	-2.82e-07	3.57e-05	5.8e-10	1.56e-07	3.89e-06	0.00030879	0.000251959	0.00365383	0.00282028	0.000239887	0.000515386	1.17e-08	0.00415025	0.00926771	9.86e-06	Alk	C4	F	OH-But	South	-3.84339	-2.55545
CS76997	IP-Laf-1	ESP	43.36	-5.88	4.77e-05	4.78e-07	0.00216276	0.00442825	3.46e-07	-1.23e-05	2.67e-07	0.000191207	0.000125909	5.38e-08	5.8e-10	2.75e-05	3.89e-06	0.000253301	0.000109096	0.00260068	0.00245121	0.000228448	0.000287343	1.17e-08	0.00455968	0.00768392	9.86e-06	Alk	C4	F	OH-But	South	-3.07387	-2.41492
CS76998	Lag1-2	GEO	41.8296	46.2831	3.1e-05	4.78e-07	0.000846651	0.00457334	3.46e-07	-1.23e-05	2.67e-07	0.000308127	0.000356525	5.38e-08	5.8e-10	1.56e-07	3.89e-06	0.000334927	7.93e-05	0.00349751	0.00464043	0.000124929	8.37e-05	3.15e-06	0.00298913	0.00874349	9.86e-06	Alk	C4	F	OH-But	South	-2.52728	-0.747804
CS76999	Lag1-4	GEO	41.8296	46.2831	0.000149511	4.78e-07	0.000332298	0.00447209	3.46e-07	-1.23e-05	2.67e-07	0.000185489	0.000230791	5.38e-08	5.8e-10	1.56e-07	8.68e-05	0.000391031	-3.22e-06	0.00402509	0.00552286	9.89e-05	3.05e-05	1.17e-08	0.00242012	0.00757934	9.86e-06	Alk	C4	F	OH-But	South	-1.89589	-0.520839
CS77000	Lag1-5	GEO	41.8296	46.2831	0.00036994	4.78e-07	0.000580858	0.00361911	3.46e-07	8.9e-05	2.67e-07	0.000112609	3.45e-05	5.38e-08	5.8e-10	1.77e-05	3.89e-06	0.000401544	-3.22e-06	0.00263153	0.00437338	0.00028581	0.000202859	1.17e-08	0.0029009	0.00966886	9.86e-06	Alk	C4	F	OH-But	South	-1.64372	-0.742939
CS77001	Lag1-6	GEO	41.8296	46.2831	0.000705173	4.78e-07	0.000334448	0.00143745	3.46e-07	0.00129103	2.67e-07	0.000109307	2.84e-05	5.38e-08	5.8e-10	1.58e-05	0.000185598	0.000262046	-3.22e-06	0.00166371	0.00472199	7.36e-05	8.76e-07	1.17e-08	0.00332009	0.0111441	9.86e-06	Alk	C4	F	OH-But	South	0.164202	-0.419823
CS77002	Lag1-7	GEO	41.8296	46.2831	4.46e-05	4.78e-07	0.000626618	0.00358714	3.46e-07	-1.23e-05	2.67e-07	0.000299765	0.000249247	5.38e-08	5.8e-10	1.56e-07	3.89e-06	0.00033684	0.000154526	0.00344983	0.00470772	0.000121111	6.6e-05	3.37e-06	0.00330371	0.0111948	9.86e-06	Alk	C4	F	OH-But	South	-1.8302	-0.485384
CS77003	Lag1-8	GEO	41.8296	46.2831	0.000282756	4.78e-07	0.000432592	0.00509294	3.46e-07	0.00028451	2.67e-07	0.000373055	0.000170202	5.38e-08	8.25e-06	1.56e-07	3.89e-06	0.00026067	-3.22e-06	0.00308253	0.00384267	0.000228208	7.65e-05	1.17e-08	0.00206318	0.00768235	9.86e-06	Alk	C4	F	OH-But	South	-1.8247	-0.239306
CS77004	Lag2-10	GEO	41.8296	46.2831	0.00376633	4.78e-07	0.000953389	-1.51e-05	0.000118625	-1.23e-05	2.67e-07	-9.99e-07	-2.82e-07	5.38e-08	5.8e-10	1.56e-07	0.000583738	0.000225474	0.000827354	0.00164928	0.00420066	0.000166178	8.76e-07	1.17e-08	0.00277942	0.0115953	9.86e-06	OH	C3	NF	3OHP	South	0.611289	-0.760867
CS77005	Lag2-4	GEO	41.8296	46.2831	0.00651712	4.78e-07	0.00204447	-1.51e-05	0.000269178	-1.23e-05	2.67e-07	-9.99e-07	-2.82e-07	5.38e-08	5.8e-10	1.56e-07	0.000566649	0.000293009	-3.22e-06	0.00390422	0.00570218	0.000132643	8.76e-07	1.17e-08	0.00454952	0.00943664	9.86e-06	OH	C3	NF	3OHP	South	-0.0598215	-3.01784
CS77006	Lag2-6	GEO	41.8296	46.2831	0.0036452	4.78e-07	0.00151468	-1.51e-05	8.56e-05	-1.23e-05	2.67e-07	-9.99e-07	-2.82e-07	5.38e-08	5.8e-10	1.56e-07	0.000519047	0.000231167	-3.22e-06	0.00283506	0.00499508	5.74e-05	8.76e-07	1.17e-08	0.00411765	0.00956022	9.86e-06	OH	C4	NF	4OHB	South	0.142795	-2.23176
CS77007	Lag2-7	GEO	41.8296	46.2831	0.00280215	-8.35e-06	0.000375521	0.000263744	-6.04e-06	0.000215467	-4.66e-06	1.74e-05	4.93e-06	-9.4e-07	-1.01e-08	-2.72e-06	0.000515163	5.46e-05	5.62e-05	0.000626998	0.00116134	0.000123007	-1.53e-05	-2.04e-07	0.00364058	0.00471243	-0.000172045	OH	C3	NF	3OHP	South	1.50691	-2.44702
CS77008	IP-Lam-0	ESP	40.57	-3.89	0.000845276	0.000258385	8.88e-06	2.73e-05	3.46e-07	0.00134488	2.67e-07	-9.99e-07	-2.82e-07	5.38e-08	5.8e-10	1.56e-07	0.00285118	0.000202005	-3.22e-06	5.13e-05	0.00896038	-6.1e-07	5.17e-05	1.17e-08	0.00290725	0.0122171	9.86e-06	Alk	C3	F	Allyl	South	1.50219	0.148823
CS77009	Lan 1	SWE	55.9745	14.3997	0.000393838	-8.35e-06	-0.000154943	0.000263744	-6.04e-06	0.00041696	-4.66e-06	1.74e-05	0.000168418	-9.4e-07	-1.01e-08	-2.72e-06	-2.09e-05	0.000320795	5.62e-05	-0.000123379	0.00728426	0.00056873	-1.53e-05	-2.04e-07	0.000748391	0.0160107	0.00354286	Alk	C3	NF	Allyl	North	0.52081	3.70921
CS77010	IP-Lch-0	ESP	40.51	-4	0.00103137	4.78e-07	8.88e-06	1.78e-05	3.46e-07	0.0019108	2.67e-07	-9.99e-07	5.53e-05	5.38e-08	5.8e-10	1.56e-07	0.00186933	0.000240126	-3.22e-06	3.11e-05	0.00720459	-6.1e-07	8.76e-07	1.17e-08	0.00236128	0.0113199	0.000723163	Alk	C3	F	Allyl	South	1.3364	0.560783
CS77012	IP-Ldd-0	ESP	41.58	-4.71	0.000579374	-8.35e-06	-0.000154943	0.000263744	-6.04e-06	0.00128104	-4.66e-06	1.74e-05	4.93e-06	-9.4e-07	1.32e-05	-2.72e-06	7.46e-05	0.000299772	5.62e-05	-8.48e-05	0.0064347	0.000489576	-1.53e-05	-2.04e-07	0.000960262	0.0109038	0.00267159	Alk	C3	NF	Allyl	South	0.84957	3.06896
CS77013	LDV-18	FRA	48.5167	-4.06667	4.15e-05	4.78e-07	0.00145064	0.00460536	3.46e-07	-1.23e-05	2.67e-07	9.44e-05	0.000261408	5.38e-08	5.8e-10	7.33e-05	2.88e-05	0.000541047	0.000176719	0.00109586	0.0038164	0.000323096	0.000343808	1.17e-08	0.00409763	0.00998336	9.86e-06	Alk	C4	F	OH-But	North	-3.70749	-0.715758
CS77014	LDV-46	FRA	48.5167	-4.06667	0.000118617	4.78e-07	0.00175428	0.00543827	3.46e-07	-1.23e-05	2.67e-07	0.0001093	0.000265147	5.38e-08	5.8e-10	7.23e-05	5.34e-05	0.00055695	0.00010942	0.00149709	0.00348527	0.000326213	0.000400429	1.17e-08	0.00394574	0.0093818	9.86e-06	Alk	C4	F	OH-But	North	-4.29228	-1.08234
CS77018	LEC-25	FRA	43.91	4.14	7.87e-05	4.78e-07	0.000674499	0.00390958	3.46e-07	-1.23e-05	2.67e-07	0.000245276	7.8e-05	5.38e-08	5.8e-10	3.05e-05	4.44e-05	0.00037009	0.000159647	0.00246842	0.00331773	0.00024246	0.000261901	1.17e-08	0.00306657	0.00945051	9.86e-06	Alk	C4	F	OH-But	North	-2.10882	-0.929807
CS77019	IP-Leg-0	ESP	40.33	-3.8	0.000894833	4.78e-07	8.88e-06	3.18e-05	3.46e-07	0.00206314	2.67e-07	-9.99e-07	7.17e-05	5.38e-08	5.8e-10	1.56e-07	0.000295603	0.000225109	-3.22e-06	3.11e-05	0.00805531	0.000232031	8.76e-07	1.17e-08	0.00162308	0.014727	9.86e-06	Alk	C3	F	Allyl	South	1.06511	1.5492
CS77021	Ler-1	GER	47.984	10.8719	0.00224861	4.78e-07	8.88e-06	-1.51e-05	3.46e-07	-1.23e-05	2.67e-07	-9.99e-07	-2.82e-07	5.38e-08	5.8e-10	1.56e-07	0.000328528	5.6e-05	-3.22e-06	7.07e-06	0.00155707	2.34e-05	8.76e-07	1.17e-08	0.00268175	0.00467624	9.86e-06	OH	C3	NF	3OHP	North	1.53306	-2.03455
CS77023	Lerik1-4	AZE	38.7406	48.6131	0.00707582	-8.35e-06	-2.19e-05	0.000263744	-6.04e-06	0.000215467	-4.66e-06	1.74e-05	4.93e-06	-9.4e-07	-1.01e-08	-2.72e-06	0.000971731	8.85e-05	5.62e-05	-8.52e-06	0.0014258	0.000214274	-1.53e-05	-2.04e-07	0.00886631	0.00496998	-0.000172045	OH	C3	NF	3OHP	North	2.97647	-3.96604
CS77024	Lerik1-7	AZE	38.7406	48.6131	0.00362561	-8.35e-06	-1.69e-05	0.000263744	-6.04e-06	0.000215467	-4.66e-06	1.74e-05	4.93e-06	-9.4e-07	-1.01e-08	-2.72e-06	0.000780246	0.00016317	5.62e-05	-4.37e-06	0.00209761	0.000422042	-1.53e-05	-2.04e-07	0.004884	0.00860425	-0.000172045	OH	C3	NF	3OHP	North	1.96688	-1.60842
CS77025	Lerik2-1	AZE	38.7833	48.5517	0.00541464	-8.35e-06	1.97e-05	0.000263744	-6.04e-06	0.000215467	-4.66e-06	1.74e-05	4.93e-06	-9.4e-07	-1.01e-08	-2.72e-06	0.00147258	0.000108363	5.62e-05	9.25e-05	0.002351	0.00022429	-1.53e-05	-2.04e-07	0.00622514	0.00961151	-0.000172045	OH	C3	NF	3OHP	North	2.55096	-2.38592
CS77026	Lerik2-3	AZE	38.7833	48.5517	0.00520119	-8.35e-06	5.6e-06	0.000263744	-6.04e-06	0.000215467	-4.66e-06	1.74e-05	4.93e-06	-9.4e-07	-1.01e-08	-2.72e-06	0.00284644	6.6e-05	5.62e-05	7.74e-05	0.00127191	0.000355213	-1.53e-05	-2.04e-07	0.00827946	0.00460123	-0.000172045	OH	C3	NF	3OHP	North	2.83887	-3.76478
CS77028	Lerik2-6	AZE	38.7833	48.5517	0.00756787	-8.35e-06	0.000153769	0.000263744	-6.04e-06	0.000215467	-4.66e-06	1.74e-05	4.93e-06	-9.4e-07	-1.01e-08	-2.72e-06	0.00154147	0.000138004	5.62e-05	6.43e-05	0.0022067	0.000239916	-1.53e-05	3.34e-05	0.00788417	0.00923072	-0.000172045	OH	C3	NF	3OHP	North	2.50118	-4.29901
CS77029	Lerik2-7	AZE	38.7833	48.5517	0.00071646	4.78e-07	8.88e-06	-1.51e-05	3.46e-07	0.000981188	2.67e-07	-9.99e-07	0.000100496	5.38e-08	5.8e-10	2.54e-05	0.000116881	0.000421237	0.000246307	7.07e-06	0.0102444	0.000390966	8.76e-07	1.17e-08	0.000848667	0.0124788	0.0009918	Alk	C3	NF	Allyl	North	0.0929928	2.66554
CS77030	Leska-1-44	BUL	41.54	24.98	0.000296009	4.78e-07	0.000382367	0.00328165	3.46e-07	0.00115131	2.67e-07	0.0009372	-2.82e-07	5.38e-08	5.8e-10	3.3e-05	0.000353007	0.000469715	8.54e-05	0.00160878	0.00609661	0.000101162	3.66e-05	1.17e-08	0.00147959	0.00824707	0.00125741	Alk	C4	F	OH-But	South	-1.26606	0.629665
CS77032	Lesno-1	RUS	53.04	51.9	0.00102201	4.78e-07	8.88e-06	-1.51e-05	3.46e-07	0.00164755	2.67e-07	-9.99e-07	-2.82e-07	5.38e-08	5.8e-10	1.56e-07	0.000125657	0.000173085	-3.22e-06	7.07e-06	0.00336063	0.000323389	8.76e-07	1.17e-08	0.00243755	0.00982595	9.86e-06	Alk	C3	NF	Allyl	North	1.3387	-0.168455
CS77033	Lesno-2	RUS	53.04	51.94	0.00117511	4.78e-07	5.24e-05	-1.51e-05	3.46e-07	0.0032653	2.67e-07	2.91e-05	-2.82e-07	5.38e-08	5.8e-10	1.56e-07	0.000163291	0.000141072	-3.22e-06	7.07e-06	0.00389578	0.000578221	8.76e-07	1.17e-08	0.00198154	0.00810497	9.86e-06	Alk	C3	NF	Allyl	North	1.52098	0.217055
CS77034	Lesno-4	RUS	53.04	51.96	0.00105709	4.78e-07	8.88e-06	-1.51e-05	3.46e-07	0.00205679	2.67e-07	-9.99e-07	-2.82e-07	5.38e-08	5.8e-10	1.56e-07	0.000151941	0.000159015	-3.22e-06	7.07e-06	0.00405871	0.000411551	8.76e-07	1.17e-08	0.00268757	0.0100516	9.86e-06	Alk	C3	NF	Allyl	North	1.42414	0.0379496
CS77035	Li-7	GER	50.3833	8.0666	0.00397201	4.78e-07	8.88e-06	-1.51e-05	3.46e-07	-1.23e-05	2.67e-07	-9.99e-07	-2.82e-07	5.38e-08	5.8e-10	1.56e-07	0.000564173	0.00011142	-3.22e-06	0.000106395	0.0037034	8.08e-05	8.76e-07	1.17e-08	0.00483486	0.011171	9.86e-06	OH	C3	NF	3OHP	North	1.96549	-1.54815
CS77039	Lill??-1	SWE	56.1494	15.7884	0.000439881	-8.35e-06	-0.000154943	0.000263744	-6.04e-06	0.00110752	-4.66e-06	1.74e-05	4.93e-06	-9.4e-07	-1.01e-08	-2.72e-06	8.38e-05	5.59e-05	5.62e-05	-0.000123379	0.00300069	0.000188076	-1.53e-05	-2.04e-07	0.000854273	0.0102708	0.0020268	Alk	C3	NF	Allyl	North	1.48403	0.926435
CS77042	Lis-1	SWE	56.0328	14.775	0.00143861	3.42e-06	6.35e-05	-0.000108062	2.47e-06	0.0019211	1.91e-06	-7.14e-06	2.96e-05	3.85e-07	4.15e-09	1.11e-06	0.000224673	0.000343562	0.000276811	0.000224203	0.00618035	0.000225231	6.27e-06	8.37e-08	0.00376786	0.0102254	7.05e-05	Alk	C3	NF	Allyl	North	1.04478	0.232718
CS77044	Lis-3	SWE	56.0328	14.775	0.00132494	4.78e-07	8.88e-06	-1.51e-05	3.46e-07	0.00112946	2.67e-07	-9.99e-07	5.94e-05	5.38e-08	5.8e-10	1.56e-07	0.000242992	0.000157167	-3.22e-06	7.07e-06	0.00402158	0.000250884	8.76e-07	1.17e-08	0.00295574	0.0129634	9.86e-06	Alk	C3	NF	Allyl	North	1.30263	0.0760146
CS77047	LL-0	ESP	41.59	2.49	-5.52e-06	4.76e-05	4.78e-05	-1.51e-05	0.000207874	-1.23e-05	2.67e-07	-9.99e-07	0.000217561	5.38e-08	5.8e-10	1.56e-07	0.00026052	0.000328915	-3.22e-06	0.00505239	0.00395018	4.33e-05	0.000142747	5.35e-06	0.000861917	0.0109077	0.00114675	MSO	C4	NF	4MSO	South	-1.17713	-0.265575
CS77048	Lom1-1	SWE	56.09	13.9	0.00146258	4.78e-07	0.000678571	-1.51e-05	0.000310286	-1.23e-05	2.67e-07	-9.99e-07	-2.82e-07	5.38e-08	5.8e-10	2.09e-05	0.000200936	0.000343869	-3.22e-06	0.00205746	0.00662828	0.000228794	8.76e-07	1.17e-08	0.00328017	0.0119484	9.86e-06	MSO	C4	NF	4MSO	North	-0.19545	-0.546422
CS77052	Lp2-6	CZE	49.38	16.81	0.00186273	9.59e-05	8.88e-06	-1.51e-05	3.46e-07	-1.23e-05	2.67e-07	-9.99e-07	-2.82e-07	5.38e-08	5.8e-10	1.56e-07	0.00272392	0.000141777	-3.22e-06	0.000124516	0.00386713	4.08e-05	8.76e-07	1.17e-08	0.0029503	0.0125695	9.86e-06	MSO	C3	NF	3MSO	North	1.75566	-0.890124
CS77054	IP-Lro-0	ESP	40.5	-3.88	0.000790191	4.78e-07	8.88e-06	0.000107679	3.46e-07	0.000630415	2.67e-07	-9.99e-07	3.04e-05	5.38e-08	5.8e-10	1.56e-07	0.000282655	0.000191818	-3.22e-06	7.07e-06	0.00661078	0.000231273	8.76e-07	1.17e-08	0.00180249	0.0075588	9.86e-06	Alk	C3	F	Allyl	South	0.892181	0.0772842
CS77055	IP-Lso-0	ESP	38.86	-3.16	0.000242981	-8.35e-06	0.000273924	0.00119584	-6.04e-06	0.000753243	-4.66e-06	0.000207383	0.000151707	-9.4e-07	-1.01e-08	4.39e-05	-6.79e-05	0.000644481	5.62e-05	0.00102563	0.00730392	0.000208803	-1.53e-05	-2.04e-07	0.00114083	0.00645188	-0.000172045	Alk	C4	F	OH-But	South	-1.16479	0.853572
CS77056	Lu-1	SWE	55.71	13.2	0.00233493	4.78e-07	8.88e-06	-1.51e-05	3.46e-07	-1.23e-05	2.67e-07	-9.99e-07	-2.82e-07	5.38e-08	5.8e-10	1.56e-07	0.000125044	0.000104812	-3.22e-06	7.41e-05	0.00299624	0.000191346	3.57e-05	1.17e-08	0.00385153	0.00922162	9.86e-06	OH	C3	NF	3OHP	North	1.45555	-1.32074
CS77057	Lu3-30	GER	48.53	9.09	0.00148782	8.59e-05	8.88e-06	8.05e-05	0.00137342	0.0024453	2.67e-07	-9.99e-07	-2.82e-07	5.38e-08	5.8e-10	1.56e-07	0.000549251	0.00018204	-3.22e-06	7.07e-06	0.00269751	0.000225986	7.61e-05	1.17e-08	0.00323692	0.00775229	9.86e-06	Alk	C3	F	Allyl	North	0.608794	-2.15855
CS77058	Lu4-2	GER	48.54	9.09	0.00118916	5.27e-05	8.88e-06	-1.51e-05	3.46e-07	0.00504082	2.67e-07	-9.99e-07	-2.82e-07	5.38e-08	5.8e-10	1.56e-07	0.000519981	0.000137696	-3.22e-06	7.07e-06	0.00377536	0.000298247	8.76e-07	1.17e-08	0.00330748	0.00888886	9.86e-06	Alk	C3	NF	Allyl	North	2.02871	-0.117451
CS77059	IP-Lum-0	ESP	42.24	-2.62	0.000221137	4.78e-07	0.000591573	0.00256953	3.46e-07	0.000318369	2.67e-07	8.65e-05	0.00016373	5.38e-08	5.8e-10	2.62e-05	3.89e-06	0.000490774	0.000101449	0.000415764	0.00567848	0.000251865	0.000160438	1.17e-08	0.0021819	0.0125076	9.86e-06	Alk	C4	F	OH-But	South	-1.52023	0.679201
CS77060	Lund	SWE	55.71	13.2	0.000169342	4.78e-07	0.00121966	-1.51e-05	0.000204365	-1.23e-05	2.67e-07	-9.99e-07	-2.82e-07	5.38e-08	5.8e-10	9.69e-05	3.89e-06	0.000673173	-3.22e-06	0.00256015	0.0051974	0.000490331	0.00037616	1.17e-08	0.00106101	0.00685606	9.86e-06	MSO	C4	NF	4MSO	North	-3.0824	-0.624069
CS77061	IP-Mac-0	ESP	40.72	-3.21	0.00108358	4.78e-07	8.88e-06	-1.51e-05	3.46e-07	0.00230999	2.67e-07	-9.99e-07	5.98e-05	5.38e-08	5.8e-10	1.56e-07	0.000113437	0.000308299	0.000422549	7.07e-06	0.00565965	0.000346064	8.76e-07	1.17e-08	0.00157935	0.00880376	0.00207679	Alk	C3	NF	Allyl	South	0.942432	1.64122
CS77062	IP-Mad-0	ESP	40.45	-3.67	-5.52e-06	4.78e-07	0.000968937	0.00449099	3.46e-07	-1.23e-05	2.67e-07	0.000152683	0.000533107	5.38e-08	5.8e-10	7.55e-05	3.89e-06	0.000473764	9.94e-05	0.00201555	0.00406068	0.000120572	2.94e-05	6.83e-06	0.00190135	0.00840797	9.86e-06	Alk	C4	F	OH-But	South	-3.58689	-0.0598416
CS77063	IP-Mah-6	ESP	40	4.25	0.000137279	4.78e-07	0.00063405	0.00554046	3.46e-07	-1.23e-05	2.67e-07	0.000569051	0.00101412	5.38e-08	5.8e-10	0.00011546	3.89e-06	0.00111185	-3.22e-06	0.0025479	0.00654855	0.000313176	0.000140848	6.39e-06	0.00235633	0.00973529	0.00287609	Alk	C4	F	OH-But	South	-6.46424	2.78952
CS77068	IP-Mar-1	ESP	39.58	-3.93	0.000353556	-8.35e-06	5.53e-05	0.000676197	-6.04e-06	0.00180544	-4.66e-06	0.000546608	4.93e-06	-9.4e-07	-1.01e-08	3.6e-05	-6.79e-05	0.000253041	5.62e-05	-3.42e-05	0.0104387	0.000574413	0.00024271	-2.04e-07	0.00104629	0.015072	-0.000172045	Alk	C3	F	Allyl	South	-0.219576	2.34642
CS77069	MAR-4-16	FRA	47.45	3.94	0.00188726	4.78e-07	7.76e-05	0.000193337	3.46e-07	0.00277811	2.67e-07	-9.99e-07	-2.82e-07	5.38e-08	5.8e-10	1.56e-07	0.000567225	0.000192845	-3.22e-06	7.07e-06	0.00510867	0.000269432	8.76e-07	1.17e-08	0.00394956	0.0120495	9.86e-06	Alk	C3	F	Allyl	North	1.70097	-0.0478368
CS77070	MAR2-3	FRA	47.35	3.93333	0.00122661	4.78e-07	8.88e-06	0.00155062	3.46e-07	0.001185	2.67e-07	-9.99e-07	-2.82e-07	5.38e-08	5.8e-10	1.56e-07	0.000636914	0.000109602	-3.22e-06	7.07e-06	0.0029266	0.000180969	8.76e-07	1.17e-08	0.00291456	0.00899027	9.86e-06	Alk	C3	F	Allyl	North	1.19124	-0.812947
CS77071	Marce-1	ITA	38.92	16.47	4.33e-05	4.78e-07	0.000791391	0.00296297	3.46e-07	0.000150469	2.67e-07	0.000657285	-2.82e-07	5.38e-08	5.8e-10	1.71e-05	3.89e-06	0.000332937	-3.22e-06	0.00136856	0.00315751	0.000152411	0.000128704	1.17e-08	0.00192362	0.00878692	9.86e-06	Alk	C4	F	OH-But	South	-1.33576	-0.831335
CS77072	Marti-1	ITA	40.64	17.31	-5.52e-06	4.78e-07	0.000231767	0.0014726	3.46e-07	-1.23e-05	2.67e-07	5.73e-05	-2.82e-07	5.38e-08	1.38e-05	2.21e-05	0.000325194	0.000573038	-3.22e-06	0.00343866	0.0074815	0.000330974	0.000186347	1.17e-08	0.000858631	0.0100688	0.00142844	Alk	C4	F	OH-But	South	-1.71119	1.8308
CS77074	IP-Mat-0	ESP	41.76	2.69	-5.52e-06	4.78e-07	0.000279561	0.00238321	3.46e-07	-1.23e-05	2.67e-07	3.47e-05	0.000357257	1.67e-05	5.8e-10	1.56e-07	5.75e-05	0.00026304	2.22e-05	0.00189973	0.00407012	0.000111661	9.18e-05	3.91e-06	0.00157132	0.0114692	0.00140233	Alk	C4	F	OH-But	South	-1.55331	0.607309
CS77078	Melic-1	ITA	38.45	16.04	-5.52e-06	4.78e-07	0.00198189	0.00496771	3.46e-07	-1.23e-05	2.67e-07	0.000884878	0.000118483	5.38e-08	5.8e-10	3.94e-05	3.89e-06	0.000398056	0.000120081	0.00165687	0.00298878	0.000289149	0.000246828	1.17e-08	0.00330513	0.00873218	9.86e-06	Alk	C4	F	OH-But	South	-3.44719	-1.38232
CS77079	Melni-1	BUL	41.53	23.39	0.000629268	3.42e-06	0.000387852	0.00210261	2.47e-06	0.000686695	1.91e-06	0.000321557	-2.02e-06	3.85e-07	4.15e-09	2.5e-05	0.000105642	0.00038129	1.8e-05	0.00120597	0.00481522	0.000288274	9.89e-05	8.37e-08	0.0032467	0.0132799	7.05e-05	Alk	C4	F	OH-But	South	-0.569697	0.0735258
CS77081	IP-Men-2	ESP	39.66	-4.34	0.000363701	5.47e-05	8.88e-06	1.41e-05	3.46e-07	0.000436008	2.67e-07	-9.99e-07	-2.82e-07	5.38e-08	5.8e-10	1.56e-07	0.00321238	0.00016901	-3.22e-06	2.82e-05	0.00762908	0.000298275	8.76e-07	1.17e-08	0.00138379	0.0151606	0.00106006	Alk	C3	F	Allyl	South	1.39253	1.35339
CS77085	Mitterberg-2-184	ITA	46.3668	11.2837	0.00181649	0.000105602	8.88e-06	-1.51e-05	3.46e-07	0.00176616	2.67e-07	-9.99e-07	5.63e-05	5.38e-08	5.8e-10	1.56e-07	0.000444552	0.000188108	0.000689041	2.77e-05	0.00538422	0.000375613	8.76e-07	1.17e-08	0.00159631	0.00977232	9.86e-06	Alk	C3	NF	Allyl	South	1.26047	0.826
CS77086	Mitterberg-2-185	ITA	46.3668	11.2837	0.00143615	0.000136771	8.88e-06	-1.51e-05	3.46e-07	0.00319147	2.67e-07	-9.99e-07	4.32e-05	5.38e-08	5.8e-10	1.56e-07	0.000814631	0.000446706	-3.22e-06	2.12e-05	0.0074254	0.000230236	8.76e-07	1.17e-08	0.00347799	0.0127893	9.86e-06	Alk	C3	NF	Allyl	South	1.27375	0.878692
CS77088	Mitterberg-3-187	ITA	46.3668	11.2837	0.00158132	4.78e-07	8.88e-06	-1.51e-05	3.46e-07	0.00187775	2.67e-07	3.4e-05	2.78e-05	5.38e-08	5.8e-10	1.56e-07	0.00066533	0.000197706	-3.22e-06	3.52e-05	0.00592102	0.000356516	8.76e-07	1.17e-08	0.00324952	0.013647	9.86e-06	Alk	C3	NF	Allyl	South	1.48053	0.525202
CS77089	Mitterberg-3-188	ITA	46.3668	11.2837	0.00127463	4.78e-07	8.88e-06	-1.51e-05	3.46e-07	0.0028232	2.67e-07	3.71e-05	-2.82e-07	5.38e-08	5.8e-10	1.56e-07	0.000300507	0.000145166	1.93e-05	8.85e-05	0.00565935	0.000176773	8.76e-07	1.17e-08	0.00297744	0.0155481	9.86e-06	Alk	C3	NF	Allyl	South	1.69252	0.757145
CS77090	Mitterberg-3-189	ITA	46.3668	11.2837	0.00148149	4.78e-07	4.69e-05	1.81e-05	3.46e-07	0.00157516	2.67e-07	-9.99e-07	7.2e-05	5.38e-08	5.8e-10	1.56e-07	0.000205209	0.000180128	-3.22e-06	7.28e-05	0.00638872	0.000311282	8.76e-07	1.17e-08	0.0029528	0.0134117	9.86e-06	Alk	C3	F	Allyl	South	1.22631	0.648794
CS77093	Mitterberg-4-192	ITA	46.3718	11.2866	0.00133483	4.78e-07	8.88e-06	-1.51e-05	3.46e-07	0.00178803	2.67e-07	-9.99e-07	-2.82e-07	5.38e-08	5.8e-10	1.56e-07	0.000156425	0.000249681	0.00043087	0.000235436	0.00417683	0.000340778	8.76e-07	1.17e-08	0.000674532	0.00779358	9.86e-06	Alk	C3	NF	Allyl	South	1.06084	0.485861
CS77094	Mitterberg-4-193	ITA	46.3718	11.2866	0.00163864	0.000224483	8.88e-06	-1.51e-05	3.46e-07	0.00163221	2.67e-07	-9.99e-07	2.27e-05	5.38e-08	5.8e-10	1.56e-07	0.000786601	0.000395813	0.000480995	0.000119369	0.00714492	0.000402395	8.76e-07	1.17e-08	0.00159146	0.0134646	0.00362481	Alk	C3	NF	Allyl	South	1.06986	2.82244
CS77095	Mitterberg-4-194	ITA	46.3718	11.2866	0.00189283	0.000574377	8.88e-06	2.45e-05	3.46e-07	0.00269754	2.67e-07	-9.99e-07	2.27e-05	5.38e-08	5.8e-10	1.56e-07	0.000620925	0.000381102	2.95e-05	0.000149718	0.00677684	0.000170672	0.000101576	1.17e-08	0.00294613	0.00991984	9.86e-06	Alk	C3	F	Allyl	South	1.22305	0.0126831
CS77102	IP-Moa-0	ESP	42.46	0.7	0.000898272	-8.35e-06	-0.000154943	0.000263744	-6.04e-06	0.00261047	-4.66e-06	1.74e-05	9.21e-05	-9.4e-07	-1.01e-08	-2.72e-06	-1.32e-05	0.000116995	5.62e-05	-7.59e-05	0.00608676	0.000342355	-1.53e-05	-2.04e-07	0.00399644	0.0144978	-0.000172045	Alk	C3	NF	Allyl	South	1.65297	0.902264
CS77103	IP-Moc-11	ESP	41.57	-5.64	0.00117006	0.000104671	8.88e-06	-1.51e-05	3.46e-07	0.00298309	2.67e-07	8.56e-05	-2.82e-07	5.38e-08	5.8e-10	5.03e-05	0.000223511	0.000311578	0.000343088	7.07e-06	0.00840849	0.000322897	8.76e-07	1.17e-08	0.00101929	0.0107109	0.001268	Alk	C3	NF	Allyl	South	0.702376	2.16093
CS77104	IP-Moe-0	ESP	41.78	2.37	-5.52e-06	4.78e-07	0.000495183	0.00409483	3.46e-07	-1.23e-05	2.67e-07	0.000663212	0.000815223	5.38e-08	5.8e-10	0.000177437	3.89e-06	0.00113985	0.00020701	0.00222091	0.00783392	0.000346323	4.53e-05	4.8e-06	0.0016148	0.0113536	0.00162545	Alk	C4	F	OH-But	South	-6.05005	3.28555
CS77105	IP-Moj-0	ESP	36.76	-5.28	-5.52e-06	4.78e-07	0.000200355	0.000503008	3.46e-07	0.000299184	2.67e-07	0.00193938	-2.82e-07	5.38e-08	5.8e-10	5.7e-05	3.89e-06	0.000820634	0.000108606	0.00158899	0.0108259	5.97e-05	8.21e-05	1.17e-08	0.000929213	0.0123166	0.00216979	Alk	C4	F	OH-But	South	-2.02523	2.76061
CS77107	IP-Mon-5	ESP	38.06	-4.38	5.1e-05	4.78e-07	0.00101985	0.00400397	3.46e-07	0.000164862	2.67e-07	0.00076878	0.000136877	5.38e-08	5.8e-10	0.000132677	3.89e-06	0.000874366	0.000271583	0.000238574	0.00859786	0.000266984	8.76e-07	1.17e-08	0.00360028	0.0101243	9.86e-06	Alk	C4	F	OH-But	South	-3.47737	1.23427
CS77108	IP-Mos-1	POR	40.04	-7.11	5.65e-05	4.78e-07	0.000226498	0.00134534	3.46e-07	0.000293449	2.67e-07	0.000214258	5.76e-05	3.94e-05	5.8e-10	1.56e-07	3.89e-06	0.000826948	4.65e-05	0.00172005	0.00949322	0.000212147	0.000244386	1.17e-08	0.00184011	0.00956741	0.00253601	Alk	C4	F	OH-But	South	-2.28172	1.94059
CS77109	IP-Mot-0	ESP	38.19	-6.24	4.9e-05	4.78e-07	0.00116255	-1.51e-05	3.46e-07	-1.23e-05	2.67e-07	0.00247986	3.74e-05	3.78e-05	5.8e-10	1.56e-07	4.03e-05	0.000431053	0.000174993	0.00102566	0.00483035	0.00027112	0.000245845	1.17e-08	0.00133399	0.00720903	0.0014158	Alk	C4	NF	Butenyl	South	-2.50315	0.0757109
CS77113	Muh-2	GER	48.42	8.76	0.00554354	4.78e-07	8.88e-06	-1.51e-05	3.46e-07	-1.23e-05	2.67e-07	-9.99e-07	-2.82e-07	5.38e-08	5.8e-10	1.56e-07	0.000486893	0.000137292	-3.22e-06	0.000100661	0.00259149	0.000270207	8.76e-07	1.17e-08	0.00507692	0.0104073	9.86e-06	OH	C3	NF	3OHP	North	2.20678	-1.88943
CS77114	IP-Mun-0	ESP	40.71	-5.04	0.000682968	-8.35e-06	-0.000154943	0.000263744	-6.04e-06	0.00132086	-4.66e-06	1.74e-05	5.3e-05	-9.4e-07	-1.01e-08	-2.72e-06	8.59e-06	0.000406145	5.62e-05	-0.000123379	0.00688068	0.000644829	-1.53e-05	-2.04e-07	0.00138581	0.00778439	0.00207681	Alk	C3	NF	Allyl	South	0.733723	1.99865
CS77119	Nar-3	AZE	38.9522	48.925	0.00686131	-8.35e-06	0.000102565	0.000263744	-6.04e-06	0.000215467	-4.66e-06	1.74e-05	4.93e-06	-9.4e-07	-1.01e-08	-2.72e-06	0.00133283	7.6e-05	5.62e-05	3.72e-05	0.000939917	0.000504009	-1.53e-05	-2.04e-07	0.00932224	0.00466614	-0.000172045	OH	C3	NF	3OHP	North	2.92158	-3.99184
CS77121	Nar-5	AZE	38.9522	48.925	0.0104242	4.78e-07	0.000193003	-1.51e-05	7.02e-05	-1.23e-05	2.67e-07	-9.99e-07	-2.82e-07	5.38e-08	5.8e-10	1.56e-07	0.00101708	0.000134736	0.000680474	0.000132609	0.00192862	0.000199481	8.76e-07	5.88e-06	0.0073805	0.00789609	9.86e-06	OH	C3	NF	3OHP	North	3.00417	-3.57257
CS77122	N??s 2	SWE	62.8815	18.4055	0.000904788	-8.35e-06	-0.000154943	0.000263744	-6.04e-06	0.00106863	-4.66e-06	1.74e-05	5.2e-05	-9.4e-07	-1.01e-08	-2.72e-06	0.000130655	0.000424512	5.62e-05	-9.57e-05	0.0092775	0.000560988	-1.53e-05	-2.04e-07	0.00151703	0.0109008	0.0028732	Alk	C3	NF	Allyl	North	0.73649	2.8963
CS77125	IP-Ndc-0	ESP	37.94	-5.45	0.000156305	4.78e-07	0.000789369	0.00182909	3.46e-07	-1.23e-05	2.67e-07	0.0019684	-2.82e-07	4.39e-05	5.8e-10	1.65e-05	8.45e-05	0.000547277	0.000210465	0.00109726	0.00610956	0.00021057	0.000233149	1.17e-08	0.00304045	0.0142655	9.86e-06	Alk	C4	F	OH-But	South	-2.58202	0.473104
CS77126	NFA-10	UK	51.4083	-0.6383	0.000107345	4.78e-07	0.000541086	0.00250103	3.46e-07	-1.23e-05	2.67e-07	-9.99e-07	0.000382658	5.38e-08	5.8e-10	1.56e-07	3.89e-06	0.000346831	3.7e-05	0.00179806	0.00330714	9.33e-05	3.86e-05	3.82e-06	0.0017596	0.0102197	9.86e-06	Alk	C4	F	OH-But	North	-1.52518	-0.173705
CS77127	Nicas-1	ITA	38.97	16.34	0.000112257	4.78e-07	0.00154544	0.00470722	3.46e-07	-1.23e-05	2.67e-07	0.000602114	9.8e-05	5.38e-08	5.8e-10	1.56e-07	0.00161545	0.000257295	0.000134113	0.00385328	0.00243077	0.000257367	0.000338452	1.17e-08	0.0042663	0.0123136	9.86e-06	Alk	C4	F	OH-But	South	-2.57553	-1.93105
CS77128	No-0	GER	51.0581	13.2995	0.00508931	6.6e-05	8.88e-06	-1.51e-05	3.46e-07	-1.23e-05	2.67e-07	-9.99e-07	-2.82e-07	5.38e-08	5.8e-10	1.56e-07	0.00130375	0.000123025	-3.22e-06	0.000121869	0.00188916	0.000140513	0.000124374	1.17e-08	0.00299079	0.0062644	9.86e-06	OH	C3	NF	3OHP	North	1.81838	-2.37845
CS77129	IP-Nog-17	ESP	40.45	-1.6	0.00135751	4.78e-07	8.88e-06	-1.51e-05	3.46e-07	0.00263741	2.67e-07	-9.99e-07	0.000143813	5.38e-08	5.8e-10	1.56e-07	0.000104867	0.000287651	0.000223089	7.07e-06	0.00503654	0.000436951	8.76e-07	1.17e-08	0.00149805	0.00913355	9.86e-06	Alk	C3	NF	Allyl	South	0.892883	0.913259
CS77134	NOZ-6	FRA	44.12	4.33	-5.52e-06	4.78e-07	0.000737588	0.0036876	3.46e-07	-1.23e-05	2.67e-07	5.11e-05	0.000124566	5.38e-08	5.8e-10	2.5e-05	3.89e-06	0.000377367	2.88e-05	0.00070767	0.00371061	0.000745528	0.000171231	1.17e-08	0.00204467	0.0114831	9.86e-06	Alk	C4	F	OH-But	North	-1.75093	0.422861
CS77136	Nyl-2	SWE	62.9513	18.2763	0.00068851	-8.35e-06	-0.000154943	0.000263744	-6.04e-06	0.00180211	-4.66e-06	1.74e-05	7.52e-05	-9.4e-07	-1.01e-08	-2.72e-06	-1.12e-05	0.00042958	5.62e-05	-0.000123379	0.0125276	0.000406389	-1.53e-05	-2.04e-07	0.0015968	0.0129881	0.00293023	Alk	C3	NF	Allyl	North	0.708324	3.7399
CS77140	Obh-13	GER	48.39	8.96	0.00271434	0.000106548	8.88e-06	-1.51e-05	3.46e-07	0.0029836	2.67e-07	-9.99e-07	-2.82e-07	5.38e-08	5.8e-10	1.56e-07	0.00113222	9.28e-05	0.00042382	0.000400272	0.00446476	0.000290565	8.76e-07	1.17e-08	0.0040697	0.0109346	9.86e-06	Alk	C3	NF	Allyl	North	2.14903	-0.318042
CS77143	IP-Oja-0	ESP	42.34	-3	0.000182838	4.78e-07	0.00145312	0.00415367	3.46e-07	-1.23e-05	2.67e-07	0.000439494	0.000114854	5.38e-08	5.8e-10	8.94e-05	3.89e-06	0.000416347	0.000143482	0.00227241	0.00334701	0.000291548	0.000461724	1.17e-08	0.00337292	0.00794865	9.86e-06	Alk	C4	F	OH-But	South	-3.82075	-1.50331
CS77144	Olympia-2	GRC	37.63	21.62	0.000145722	4.78e-07	0.00149288	0.00386906	3.46e-07	-1.23e-05	2.67e-07	0.000479024	-2.82e-07	5.38e-08	5.8e-10	1.56e-07	0.000843194	0.00021841	4.29e-05	0.00240333	0.00318618	0.000317712	8.54e-05	1.17e-08	0.00341991	0.00832164	9.86e-06	Alk	C4	F	OH-But	South	-1.49219	-1.69436
CS77145	Omn-1	SWE	62.9308	18.3448	0.00116236	4.78e-07	8.88e-06	-1.51e-05	3.46e-07	0.00102493	2.67e-07	-9.99e-07	3.06e-05	5.38e-08	5.8e-10	1.56e-07	0.000271217	0.000268152	0.00048507	7.07e-06	0.00682713	0.000291384	8.76e-07	1.17e-08	0.00125038	0.0102641	0.00169099	Alk	C3	NF	Allyl	North	0.891744	1.67525
CS77146	Omn-5	SWE	62.9308	18.3448	0.00235937	4.78e-07	8.88e-06	-1.51e-05	3.46e-07	0.00230551	2.67e-07	-9.99e-07	3.64e-05	5.38e-08	5.8e-10	1.56e-07	0.000535412	0.000208957	0.000632441	7.07e-06	0.00592125	0.000544194	8.76e-07	1.17e-08	0.00221069	0.0122748	0.00317885	Alk	C3	NF	Allyl	North	1.49916	2.35297
CS77151	Orast-1	ROU	45.84	23.16	0.00152865	0.000140087	8.88e-06	5.99e-05	3.46e-07	0.00279383	2.67e-07	-9.99e-07	-2.82e-07	5.38e-08	5.8e-10	1.56e-07	0.000860914	0.000328573	0.000812291	4.13e-05	0.00551446	0.000317339	8.76e-07	1.17e-08	0.00121116	0.00873273	0.00185379	Alk	C3	F	Allyl	South	1.27448	1.67126
CS77152	IP-Orb-10	ESP	42.97	-1.23	0.0002103	4.78e-07	0.000448838	0.00233272	3.46e-07	0.000386744	2.67e-07	0.000214524	-2.82e-07	5.38e-08	5.8e-10	3.93e-05	3.89e-06	0.000489129	7.3e-05	0.000544799	0.00511962	0.000212363	4.31e-05	1.17e-08	0.00325248	0.0120262	9.86e-06	Alk	C4	F	OH-But	South	-0.819398	0.20878
CS77154	Ost-0	SWE	60.25	18.37	0.0005052	-8.35e-06	-0.000154943	0.000263744	-6.04e-06	0.000973945	-4.66e-06	1.74e-05	0.00014742	-9.4e-07	-1.01e-08	-2.72e-06	-6.79e-05	0.000243776	5.62e-05	-0.000123379	0.00845036	0.000830682	-1.53e-05	-2.04e-07	0.00116515	0.0144955	0.00311149	Alk	C3	NF	Allyl	North	0.726727	3.68117
CS77155	IP-Ovi-1	ESP	43.38	-5.87	0.000134522	4.78e-07	0.000941672	0.00298477	3.46e-07	-1.23e-05	2.67e-07	0.000167204	0.000136549	5.38e-08	9.53e-06	1.3e-05	3.89e-06	0.000399167	0.000134943	0.00368992	0.00298514	0.000220208	0.000501297	1.17e-08	0.00401734	0.00867122	9.86e-06	Alk	C4	F	OH-But	South	-2.89482	-1.30615
CS77156	Oy-0	NOR	60.3855	6.19302	0.00108545	0.000283501	8.88e-06	-1.51e-05	3.46e-07	-1.23e-05	2.67e-07	-9.99e-07	-2.82e-07	5.38e-08	5.8e-10	1.56e-07	0.00732396	0.000132471	0.000433974	0.000191506	0.00270594	0.000514221	8.76e-07	1.17e-08	0.00146913	0.0066464	9.86e-06	MSO	C3	NF	3MSO	North	2.04453	-1.24128
cs77158	IP-Pad-0	ESP	41.34	0.99	0.00134301	9.31e-06	0.000172697	-0.000293964	6.73e-06	0.00304893	5.19e-06	7.13e-05	6.46e-05	1.05e-06	1.13e-08	7.37e-05	0.000249441	0.000636091	0.000614328	0.000221904	0.0111121	0.000107711	1.7e-05	2.28e-07	0.000899462	0.00699342	0.00141234	Alk	C3	NF	Allyl	South	-0.500644	2.44528
CS77159	IP-Pal-0	ESP	42.34	1.3	0.000638104	4.78e-07	8.88e-06	0.00118188	3.46e-07	0.00131444	2.67e-07	0.000766938	0.000213998	5.38e-08	6.3e-06	0.000110604	4.05e-05	0.0012764	-3.22e-06	0.000557041	0.0108385	0.000185841	3.78e-05	1.17e-08	0.000715389	0.0119418	0.00382358	Alk	C4	F	OH-But	South	-2.95073	4.80572
CS77161	Panik-1	RUS	53.05	52.15	0.00148238	4.78e-07	5.13e-05	-1.51e-05	3.46e-07	0.00271973	2.67e-07	-9.99e-07	-2.82e-07	5.38e-08	5.8e-10	1.56e-07	0.000156411	0.000154221	-3.22e-06	7.07e-06	0.00326206	0.000222901	8.76e-07	1.17e-08	0.00323505	0.00983741	9.86e-06	Alk	C3	NF	Allyl	North	1.65245	-0.438116
CS77163	Parti-1	RUS	52.99	52.16	0.00111554	4.78e-07	8.88e-06	-1.51e-05	3.46e-07	0.00226909	2.67e-07	3.53e-05	-2.82e-07	5.38e-08	5.8e-10	1.56e-07	3.7e-05	0.000191508	-3.22e-06	7.07e-06	0.00412444	0.000356524	8.76e-07	1.17e-08	0.00328243	0.00827382	9.86e-06	Alk	C3	NF	Allyl	North	1.40238	-0.314547
CS77166	IP-Pds-1	ESP	42.87	-6.45	0.000201948	4.78e-07	0.000377074	0.00234738	3.46e-07	-1.23e-05	2.67e-07	0.000140844	3.99e-05	5.38e-08	5.8e-10	2.17e-05	9.45e-05	0.000366805	-3.22e-06	0.00142519	0.00762207	0.000672611	0.000224163	1.17e-08	0.00147007	0.014589	9.86e-06	Alk	C4	F	OH-But	South	-1.27454	1.34547
CS77167	IP-Pee-0	ESP	40.78	-3.62	0.000547136	-8.35e-06	-0.000154943	0.000263744	-6.04e-06	0.00113323	-4.66e-06	1.74e-05	9.5e-05	-9.4e-07	-1.01e-08	-2.72e-06	-1.41e-06	0.000170597	5.62e-05	-0.000123379	0.0046586	0.000405426	-1.53e-05	-2.04e-07	0.00161792	0.0110012	0.00226347	Alk	C3	NF	Allyl	South	1.11005	1.6321
CS77169	IP-Per-0	ESP	37.6	-1.12	0.000449522	4.78e-07	0.000129104	0.00107548	3.46e-07	0.00161673	2.67e-07	0.000396287	5.88e-05	5.38e-08	5.8e-10	1.56e-07	4.03e-05	0.000477592	4.56e-05	0.00110174	0.00920073	0.000185308	8.76e-07	1.17e-08	0.00165832	0.00867498	9.86e-06	Alk	C4	F	OH-But	South	-0.191288	1.04824
CS77170	Petergof	RUS	59	29	0.00214316	4.78e-07	8.88e-06	-1.51e-05	3.46e-07	-1.23e-05	2.67e-07	-9.99e-07	-2.82e-07	5.38e-08	5.8e-10	1.56e-07	0.000349549	9.21e-05	0.000604514	0.000195726	0.00220377	0.000136265	8.76e-07	1.17e-08	0.00493519	0.0108955	9.86e-06	OH	C3	NF	3OHP	North	1.61712	-1.11568
CS77171	Pfn-10	GER	48.54	9.09	0.00231115	0.000188863	6.19e-05	-1.51e-05	3.46e-07	0.00344583	2.67e-07	-9.99e-07	-2.82e-07	5.38e-08	5.8e-10	1.56e-07	0.00125475	0.000225879	0.000477998	7.07e-06	0.00450975	0.00013198	8.76e-07	1.17e-08	0.00364209	0.00711765	9.86e-06	Alk	C3	NF	Allyl	North	1.92251	-0.584784
CS77172	Pfn-N2.2-6	GER	48.56	9.11	0.00338674	4.78e-07	8.88e-06	-1.51e-05	3.46e-07	0.00065799	2.67e-07	-9.99e-07	3.87e-05	2.46e-05	5.8e-10	1.56e-07	0.000610071	0.000172495	0.000562485	7.07e-06	0.00459028	0.000285227	8.76e-07	1.17e-08	0.00442301	0.0137557	9.86e-06	OH	C3	NF	3OHP	North	1.36475	-0.0346991
CS77173	PHW-2	ITA	43.7703	11.2547	-5.52e-06	4.78e-07	0.000714127	0.0042274	3.46e-07	-1.23e-05	2.67e-07	0.000114342	0.00018057	5.38e-08	5.8e-10	5.62e-05	3.89e-06	0.000710076	0.000124247	0.000904555	0.00602885	0.000397017	0.000249567	1.17e-08	0.00368825	0.0112403	9.86e-06	Alk	C4	F	OH-But	South	-2.91788	0.428684
CS77174	PHW-34	FRA	48.6103	2.3086	0.00573797	3.46e-05	8.88e-06	-1.51e-05	3.46e-07	-1.23e-05	2.67e-07	-9.99e-07	-2.82e-07	5.38e-08	5.8e-10	1.56e-07	0.000306644	0.000215765	-3.22e-06	6.65e-05	0.00405469	0.000121525	8.76e-07	1.17e-08	0.00626111	0.0129304	9.86e-06	OH	C3	NF	3OHP	North	2.21175	-1.69975
CS77175	IP-Pib-1	ESP	42.72	-3.44	0.000781381	-8.35e-06	-0.000154943	0.000263744	-6.04e-06	0.00140232	-4.66e-06	1.74e-05	0.000158973	-9.4e-07	-1.01e-08	-2.72e-06	-9.5e-06	0.000102775	5.62e-05	-0.000123379	0.0039816	0.000415106	-1.53e-05	-2.04e-07	0.000840152	0.0118706	-0.000172045	Alk	C3	NF	Allyl	South	1.123	0.994245
CS77176	IP-Pie-0	ESP	40.46	-5.32	0.00109566	4.78e-07	8.88e-06	-1.51e-05	3.46e-07	0.00278054	2.67e-07	-9.99e-07	0.000103062	5.38e-08	5.8e-10	1.56e-07	6.52e-05	0.000654609	0.000396301	4.34e-05	0.0113785	0.000468399	8.76e-07	1.17e-08	0.000884061	0.0116616	9.86e-06	Alk	C3	NF	Allyl	South	0.1991	2.96257
CS77177	Pigna-1	ITA	41.18	14.18	-0.000107343	9.31e-06	0.000172697	0.00791612	6.73e-06	-0.000240156	5.19e-06	-1.94e-05	0.000278487	1.05e-06	1.13e-08	3.03e-06	7.57e-05	0.000476593	-6.26e-05	0.000806796	0.00515195	0.000459531	0.000172969	2.28e-07	0.00298522	0.0130114	0.000191759	Alk	C4	F	OH-But	South	-2.63361	0.739951
CS77178	IP-Pil-0	ESP	40.46	-4.26	0.000619664	4.78e-07	8.88e-06	1.29e-05	3.46e-07	0.00111057	2.67e-07	-9.99e-07	4.57e-05	5.38e-08	5.8e-10	1.56e-07	0.000838629	0.000150791	-3.22e-06	5.71e-05	0.00579173	0.000195116	8.76e-07	1.17e-08	0.00168212	0.0127182	0.00131715	Alk	C3	F	Allyl	South	1.15911	1.05479
CS77179	IP-Piq-0	ESP	42.1	-2.56	0.000666303	4.78e-07	0.000572906	0.00273256	3.46e-07	0.000955675	2.67e-07	0.000323214	-2.82e-07	5.38e-08	5.8e-10	1.56e-07	0.000365045	0.000231311	4.18e-05	0.00109556	0.00389569	0.000148056	8.76e-07	1.17e-08	0.00455455	0.0121682	9.86e-06	Alk	C4	F	OH-But	South	0.0852229	-0.785399
CS77181	PLY-20	FRA	48.59	4.24	8.38e-05	4.78e-07	0.00179287	0.00404524	3.46e-07	-1.23e-05	2.67e-07	0.000189894	0.000209229	5.38e-08	5.8e-10	9.77e-05	3.89e-06	0.000711986	0.000333963	0.00215768	0.00595277	0.000272788	0.000452376	1.17e-08	0.0042328	0.0126776	9.86e-06	Alk	C4	F	OH-But	North	-4.61608	-0.24902
CS77182	Pn-0	FRA	48.0653	-2.96591	0.00336616	4.78e-07	8.88e-06	-1.51e-05	3.46e-07	-1.23e-05	2.67e-07	-9.99e-07	-2.82e-07	5.38e-08	5.8e-10	1.56e-07	0.000122267	9.75e-05	0.0002345	0.000121767	0.00221804	0.000178118	8.76e-07	1.17e-08	0.00287788	0.00576614	9.86e-06	OH	C3	NF	3OHP	North	1.60467	-1.61519
[truncated: 276 more rows]
