# Supplementary material for: Genetic variation, environment and demography intersect to shape Arabidopsis defense metabolite variation across Europe
Source: eLife. 2021 May 5;10:e67784. doi: 10.7554/eLife.67784 (PMC8205490; doi:10.7554/eLife.67784)
Supplement: Supplementary file 2. — The number of significant SNPs in the GSLs related loci (columns c to o) was counted for each GWA study separately. Rows 2–3: common name and AT number of gene/s in the loci. Rows 4–5: upstream and downstream positions of the relevant loci (10 kb were added upstream and downstream of the genes). Rows 6–33: GSLs traits used for GWA studies. In black: number of SNPs with p value between 0.00001 and 0.0000001. In red: number of SNPs with p value equal or smaller than 0.0000001. [file elife-67784-supp2.xlsx]

## Sheet: Sheet2
Supplementary table 2: SNPs in GSLs related loci under different GWAS: GSLs values were used as traits to conduct GWAS. The number of significant SNPs in the GSLs related loci (columns c to o) were counted for each GWAS separately. Rows 2-3: common name and AT number of gene/s in the loci. Rows 4-5: upstream and downstream positions of the relevant loci (10kb were added upstream and downstream of…
	Total number of sig. SNPs	GS-OX6,5,7	ESP	GS-OX2,3,4,1	NAD-ME1	GS-OH	ESM1	NSP3,1,4	NSP2	NSP5	AOP3,2	MYB29	MAM1,3	MYB28
AT number		AT1G12130, AT1G12140, AT1G12160.1	AT1G54040.2	AT1G62540.1, AT1G62560.1, AT1G62570, AT1G65860	AT2G13560	AT2G25450	AT3G14210	AT3G16390, AT3G16400, AT3G16410	AT2G33070	AT5G48180	AT4G03060, AT4G03050	AT5G07690	AT5G23010, AT5G23020	AT5G61420
Pos. upstream		1.41085	1.20161	1.23141	2.56397	2.1082	3.47193	3.55523	3.14018	3.19531	4.13337	5.24366	5.76928	5.24679		Black:	# of SNPs with p value between 0.00001 to 0.0000001
Pos. downstream		1.41384	1.20184	1.24513	2.56656	2.10842	3.4742	3.55849	3.14041	3.19553	4.13642	5.24587	5.77321	5.24701		Red:	# of SNPs with p value equal or smaller than 0.0000001
PC1	197, 1161										6, 18		9, 259
PC2	410, 95										129, 14		11, 36
3OHP	326, 1108			2							15, 168		71, 132
3MSO	20, 111	1		1
4OHB	126, 1281										11, 32		11, 224
OH-3-Butenyl	97, 260					1							61, 97
4MSO	367, 205										2, 1		92, 61
Allyl	213, 548										40, 169		36, 64
5MSO	283, 172			2							2		88, 28
3-Butenyl	34, 101			1									8, 1
Branched	106, 328					1					16, 42		23, 107
OHPentenyl	6, 83
4OHI3M	4, 65
6MSO	207, 541										18		15, 129
3MT	79, 16												29
7MSO	205, 308												25, 124
4Pentenyl
4MT	201, 1117										3, 4		47, 209
8MSO	1
I3M	5
7MT	282, 1217										34, 35		43, 189
4MOI3M	6, 227			1
BZO	423, 127										13, 122
8MT	125, 275										3		57, 36
8MTder	1, 5
Total_Aliphatic
Total_SC	217, 169										2		31, 67
Total_LC	24												8
